# Supplementary material for: Reactions of 3-acylchromones with dimethyl 1,3-acetonedicarboxylate and 1,3-diphenylacetone: one-pot synthesis of functionalized 2-hydroxybenzophenones, 6H-benzo[c]chromenes and benzo[c]coumarins
Source: Royal Society of Chemistry journal article supplement (doi:10.1039/c2ob07020k), 2012-01-01

## Supporting Information. Part 2

### Reactions of 3-acylchromones with dimethyl 1,3-acetonedicarboxylate and 1,3-diphenylacetone: one-pot synthesis of functionalized 2-hydroxybenzophenones, 6*H*-benzo[*c*]chromenes and benzo[*c*]coumarins

34

Viktor O. Iaroshenko<sup>a,b\*</sup>, Iryna Savych<sup>a</sup>, Alexander Villinger<sup>a</sup>, Vyacheslav Ya. Sosnovskikh<sup>d</sup>, Peter Langer<sup>a,e</sup>

<sup>a</sup>*Institut für Chemie, Universität Rostock, Albert Einstein Str. 3a, 18059 Rostock, Germany E-mail: [viktor.iaroshenko@uni-rostock.de](mailto:viktor.iaroshenko@uni-rostock.de), [iva108@googlemail.com](mailto:iva108@googlemail.com)*

<sup>b</sup>*National Taras Shevchenko University, 62 Volodymyrska st., Kyiv-33, 01033, Ukraine.*

<sup>c</sup>*Department of Chemistry, Ural Federal University, 51 Lenina Ave., 620083 Ekaterinburg, Russia.*

<sup>d</sup>*Leibniz-Institut für Katalyse an der Universität Rostock e.V., Albert Einstein Str. 29a, 18059 Rostock, Germany.*

**(E) Copies of <sup>1</sup>H and <sup>13</sup>C NMR spectra for all compounds synthesised**

Savych IS-15 1H DMSO

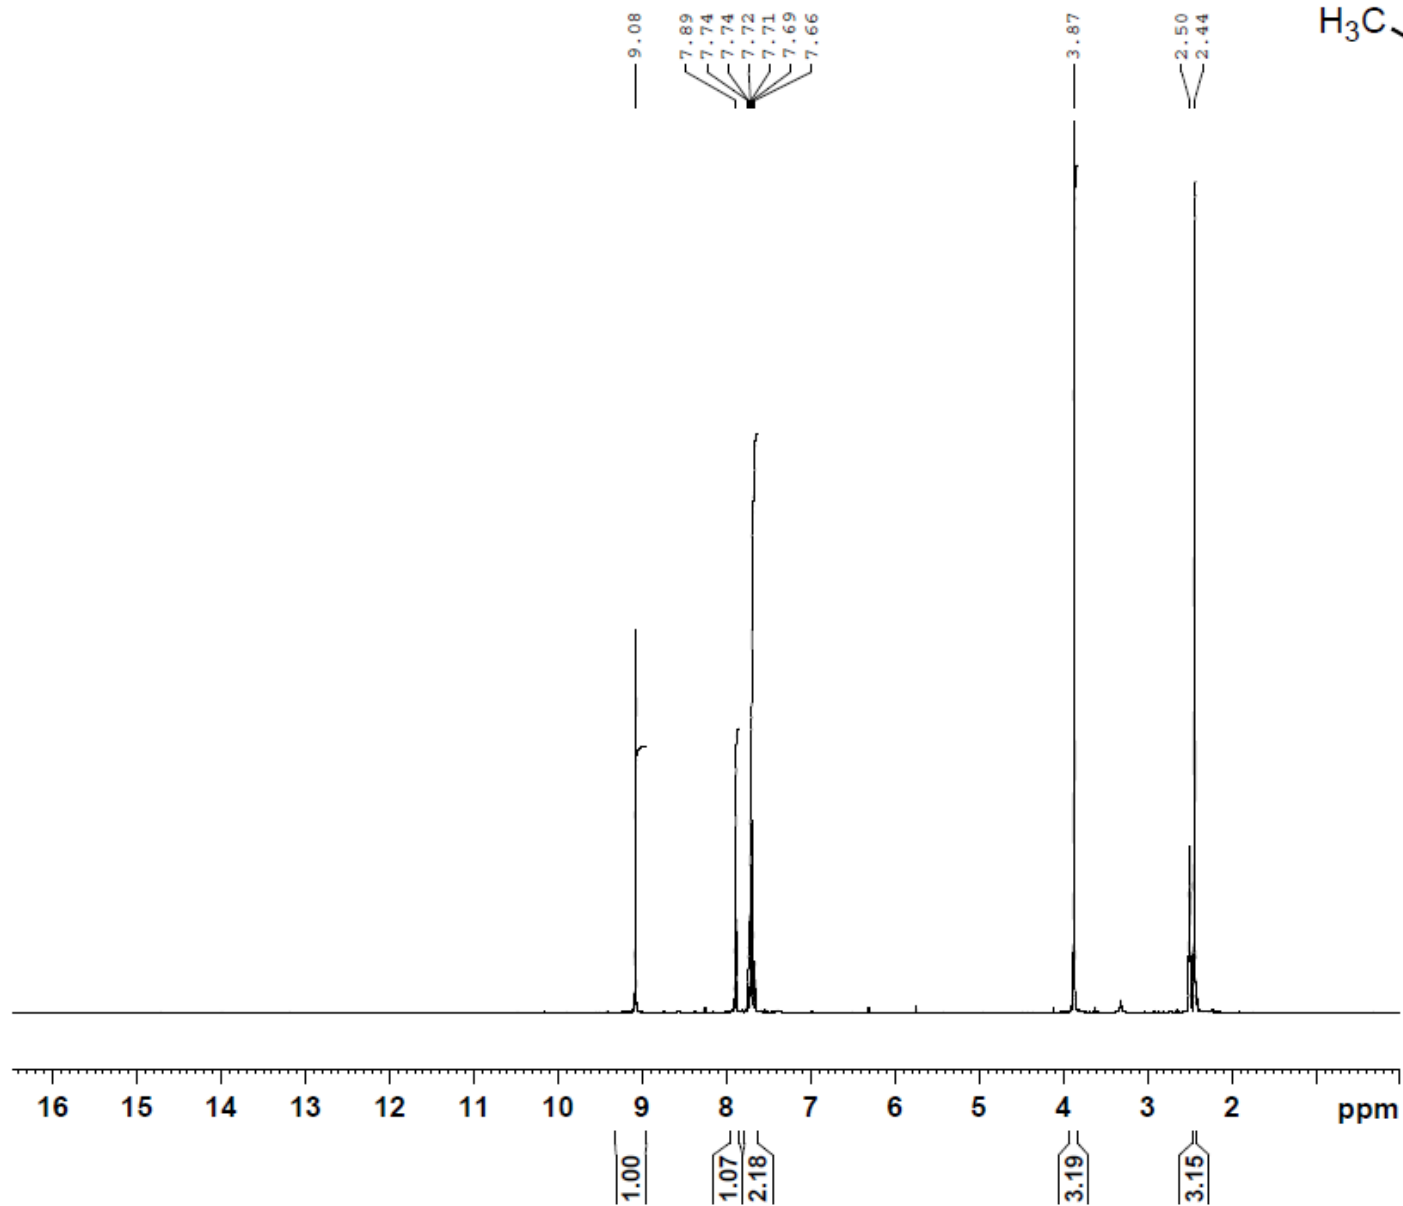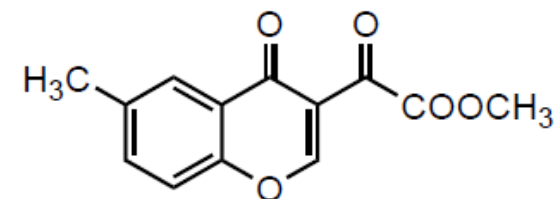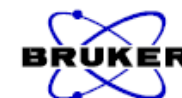

Current Data Parameters

NAME 101216.u318 MM15  
EXPNO 10  
PROCNO 1

F2 - Acquisition Parameters

Date\_ 20101216  
Time 11.46  
INSTRUM spect  
PROBHD 5 mm PABBO BB-  
PULPROG zg30  
TD 65536  
SOLVENT DMSO  
NS 16  
DS 2  
SWH 6188.119 Hz  
FIDRES 0.094423 Hz  
AQ 5.2953587 sec  
RG 128  
DW 80.800 usec  
DE 10.00 usec  
TE 298.2 K  
D1 1.00000000 sec  
TD0 1

----- CHANNEL f1 -----

NUC1 1H  
P1 10.00 usec  
PL1 0.00 dB  
PL1W 11.25325108 W  
SFO1 300.1318534 MHz

F2 - Processing parameters

SI 32768  
SF 300.1300053 MHz  
WDW EM  
SSB 0  
LB 0.30 Hz  
GB 0  
PC 1.00

Savych IS-15 13C DMSO

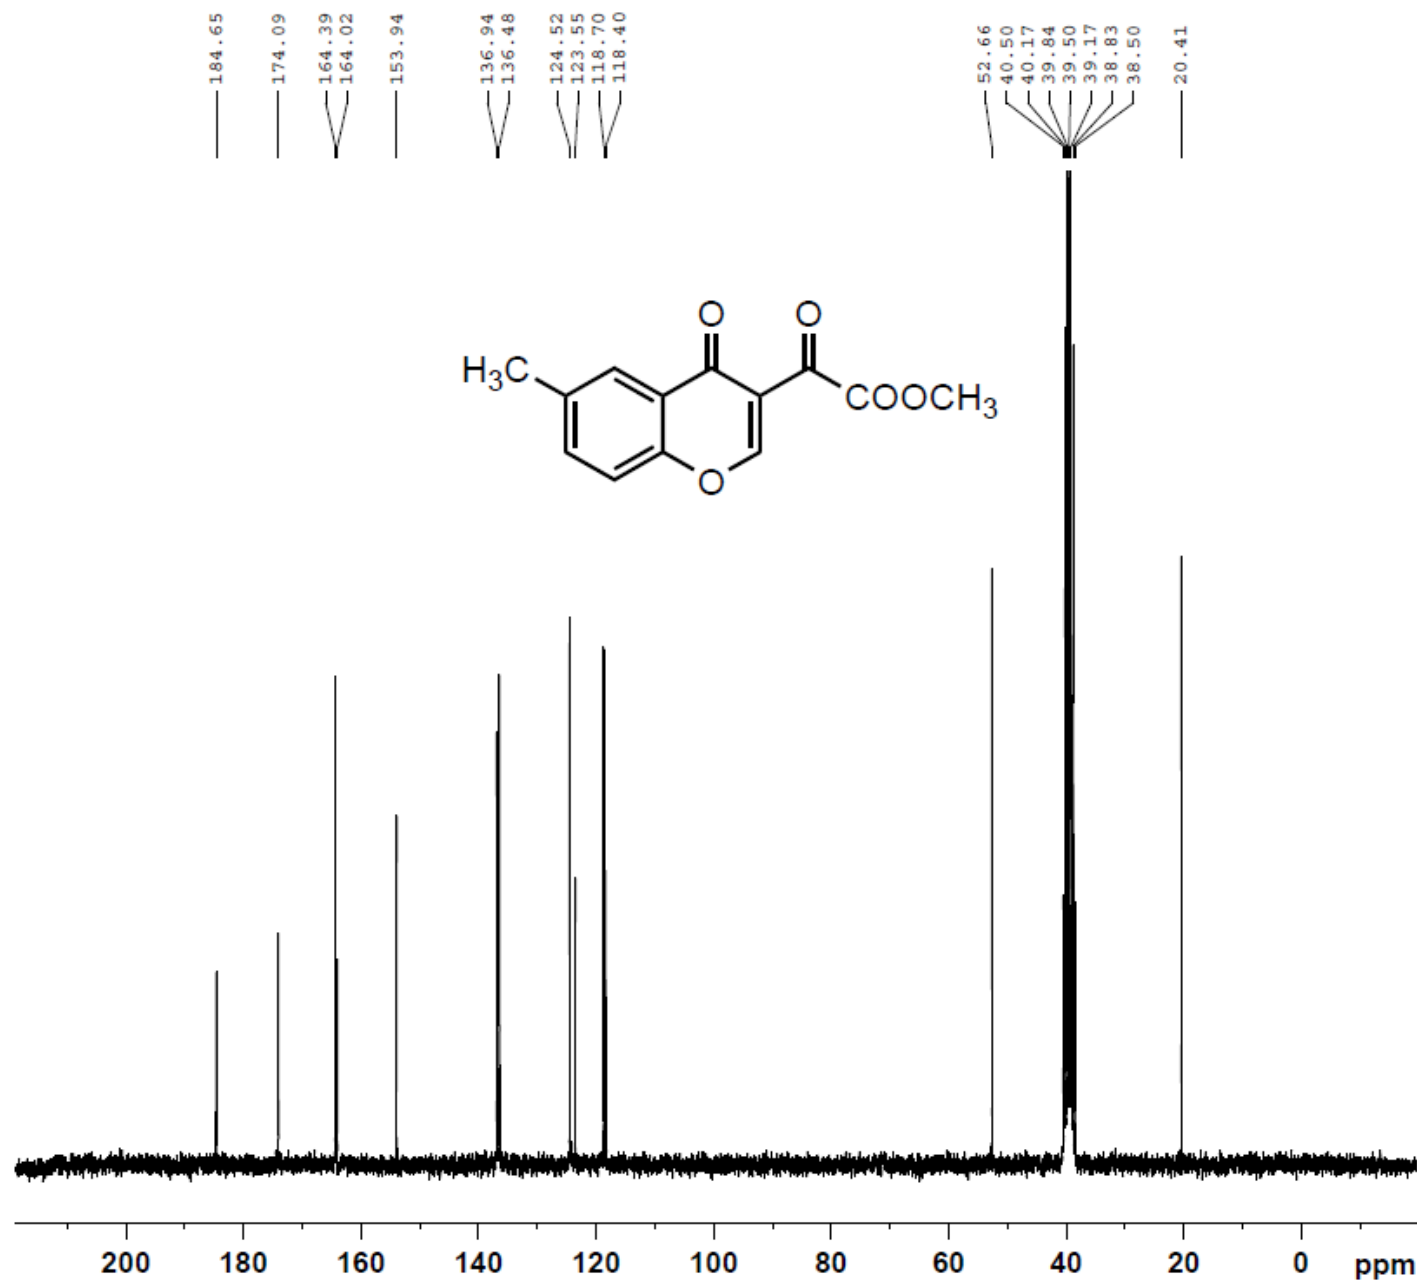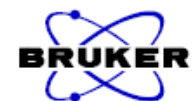

Current Data Parameters  
NAME 110525.212 MM-15  
EXPNO 10  
PROCNO 1

F2 - Acquisition Parameters  
Date\_ 20110526  
Time 3.21  
INSTRUM spect  
PROBHD 5 mm PABBO BB-  
PULPROG zgpg30  
TD 65536  
SOLVENT DMSO  
NS 1024  
DS 4  
SWH 15000.000 Hz  
FIDRES 0.228882 Hz  
AQ 2.1845834 sec  
RG 2050  
DW 33.333 usec  
DE 10.00 usec  
TE 298.7 K  
D1 2.00000000 sec  
d11 0.03000000 sec  
DELTA 1.89999998 sec  
TD0 1

===== CHANNEL f1 =====  
NUC1 13C  
P1 10.00 usec  
PL1 -1.00 dB  
SFO1 62.9015280 MHz

===== CHANNEL f2 =====  
CPDPRG2 waltz16  
NUC2 1H  
PCPD2 70.00 usec  
PL12 15.00 dB  
PL13 15.00 dB  
PL2 -2.50 dB  
SFO2 250.1310005 MHz

F2 - Processing parameters  
SI 32768  
SF 62.8952692 MHz  
WDW EM  
SSB 0  
LB 1.00 Hz  
GB 0  
PC 1.40

Savych IS-67 1H DMSO

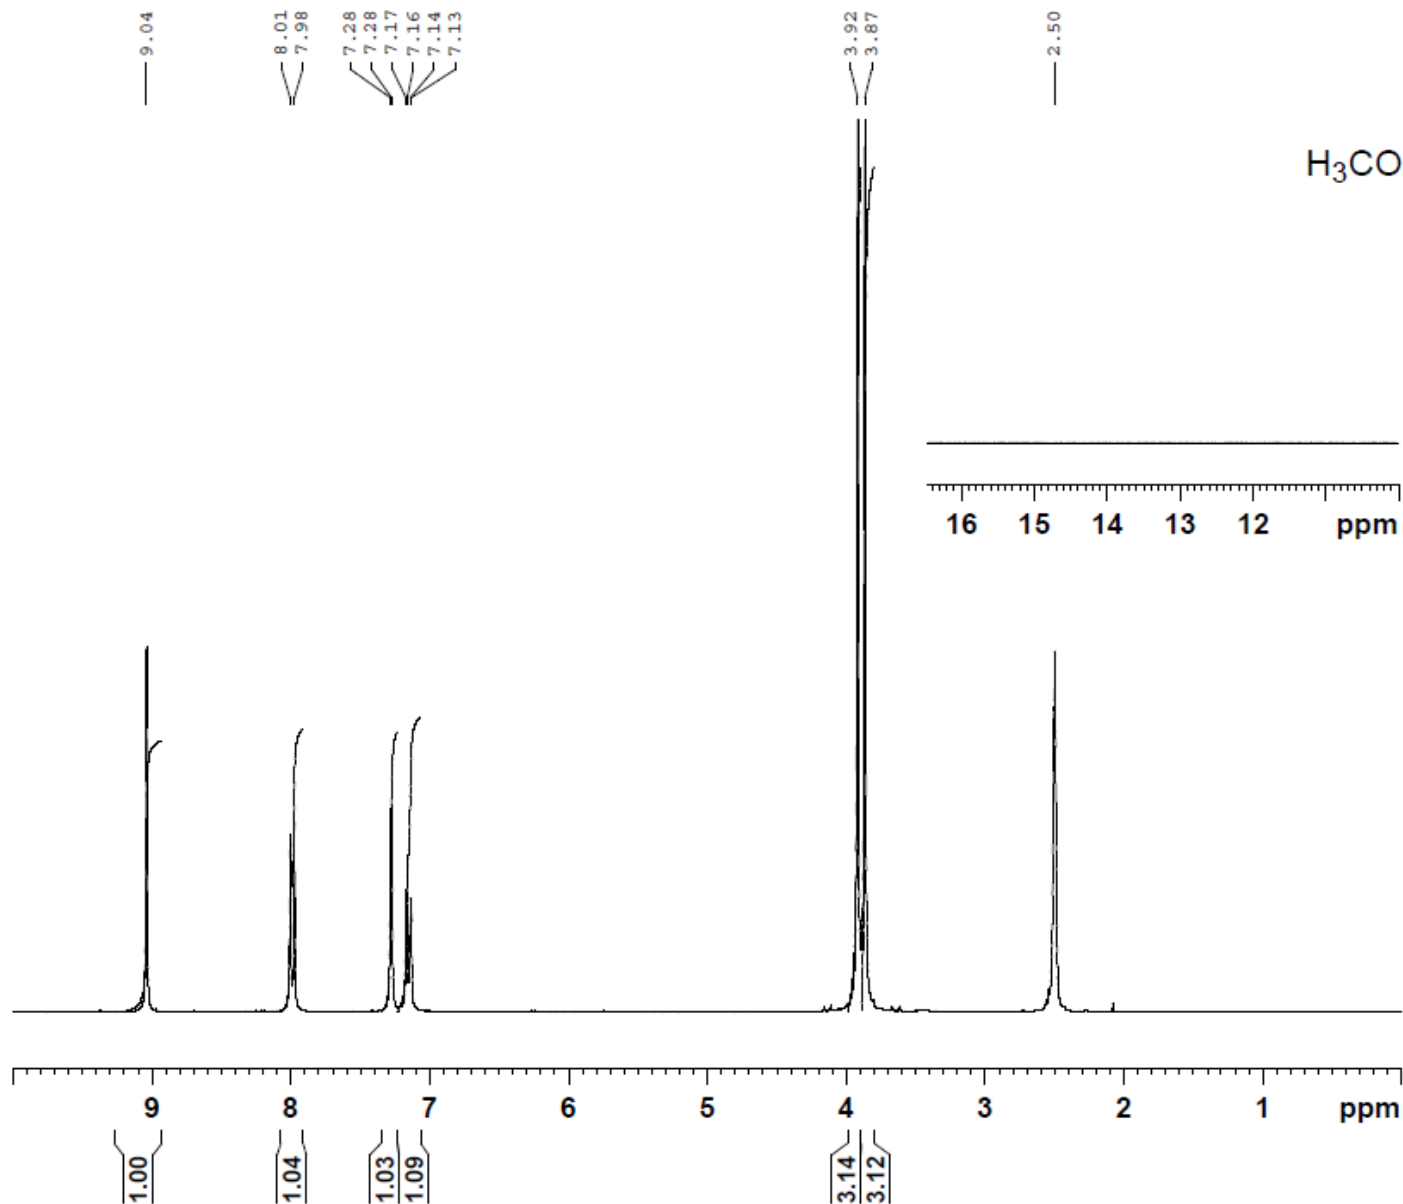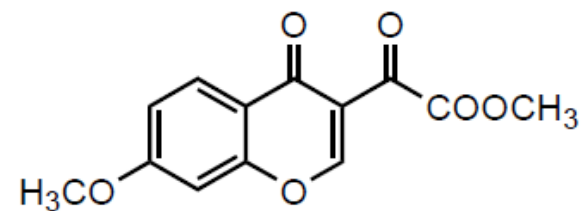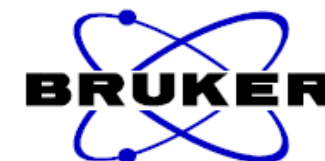

Current Data Parameters

NAME 110307.u303 IS-67  
EXPNO 10  
PROCNO 1

F2 - Acquisition Parameters

Date\_ 20110307  
Time 9.45  
INSTRUM spect  
PROBHD 5 mm PABBO BB-  
PULPROG zg30  
TD 65536  
SOLVENT DMSO  
NS 16  
DS 2  
SWH 6188.119 Hz  
FIDRES 0.094423 Hz  
AQ 5.2953587 sec  
RG 114  
DW 80.800 usec  
DE 10.00 usec  
TE 298.2 K  
D1 1.00000000 sec  
TD0 1

----- CHANNEL f1 -----

NUC1 1H  
P1 10.00 usec  
PL1 0.00 dB  
PL1W 11.25325108 W  
SFO1 300.1318534 MHz

F2 - Processing parameters

SI 32768  
SF 300.1300063 MHz  
WDW EM  
SSB 0  
LB 0.30 Hz  
GB 0  
PC 1.00



Savych IS-67 13C DMSO

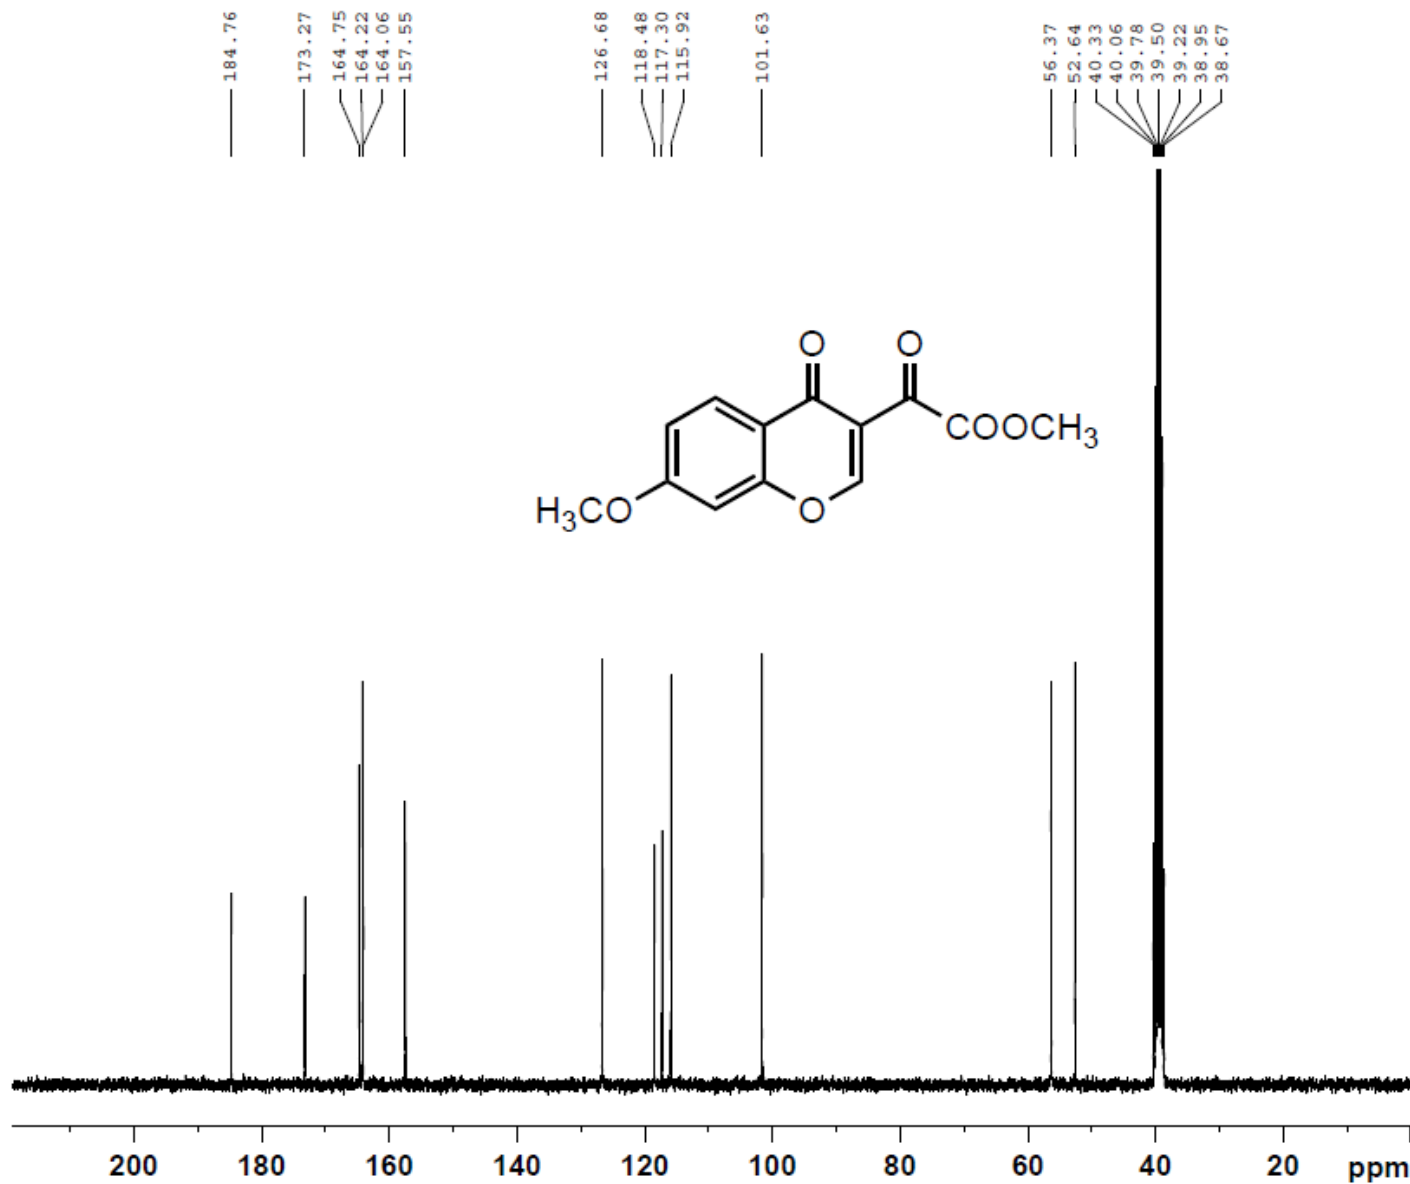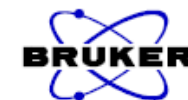

Current Data Parameters  
NAME 110307.u303 IS-67  
EXPNO 11  
PROCNO 1

F2 - Acquisition Parameters  
Date\_ 20110308  
Time 2.03  
INSTRUM spect  
PROBHD 5 mm PABBO BB-  
PULPROG zgpg30  
TD 65536  
SOLVENT DMSO  
NS 1024  
DS 4  
SWH 18028.846 Hz  
FIDRES 0.275098 Hz  
AQ 1.8175818 sec  
RG 2050  
DW 27.733 usec  
DE 10.00 usec  
TE 298.2 K  
D1 2.00000000 sec  
D11 0.03000000 sec  
TD0 1

===== CHANNEL f1 =====  
NUC1 13C  
P1 10.00 usec  
PL1 -0.50 dB  
PL1W 33.25691986 W  
SFO1 75.4752953 MHz

===== CHANNEL f2 =====  
CPDPRG2 waltz16  
NUC2 1H  
PCPD2 72.00 usec  
PL2 0.00 dB  
PL12 17.00 dB  
PL13 17.00 dB  
PL2W 11.25325108 W  
PL12W 0.22453187 W  
PL13W 0.22453187 W  
SFO2 300.1312005 MHz

F2 - Processing parameters  
SI 32768  
SF 75.4677870 MHz  
WDW EM  
SSB 0  
LB 1.00 Hz  
GB 0  
PC 1.40

Savych IS-68 1H DMSO

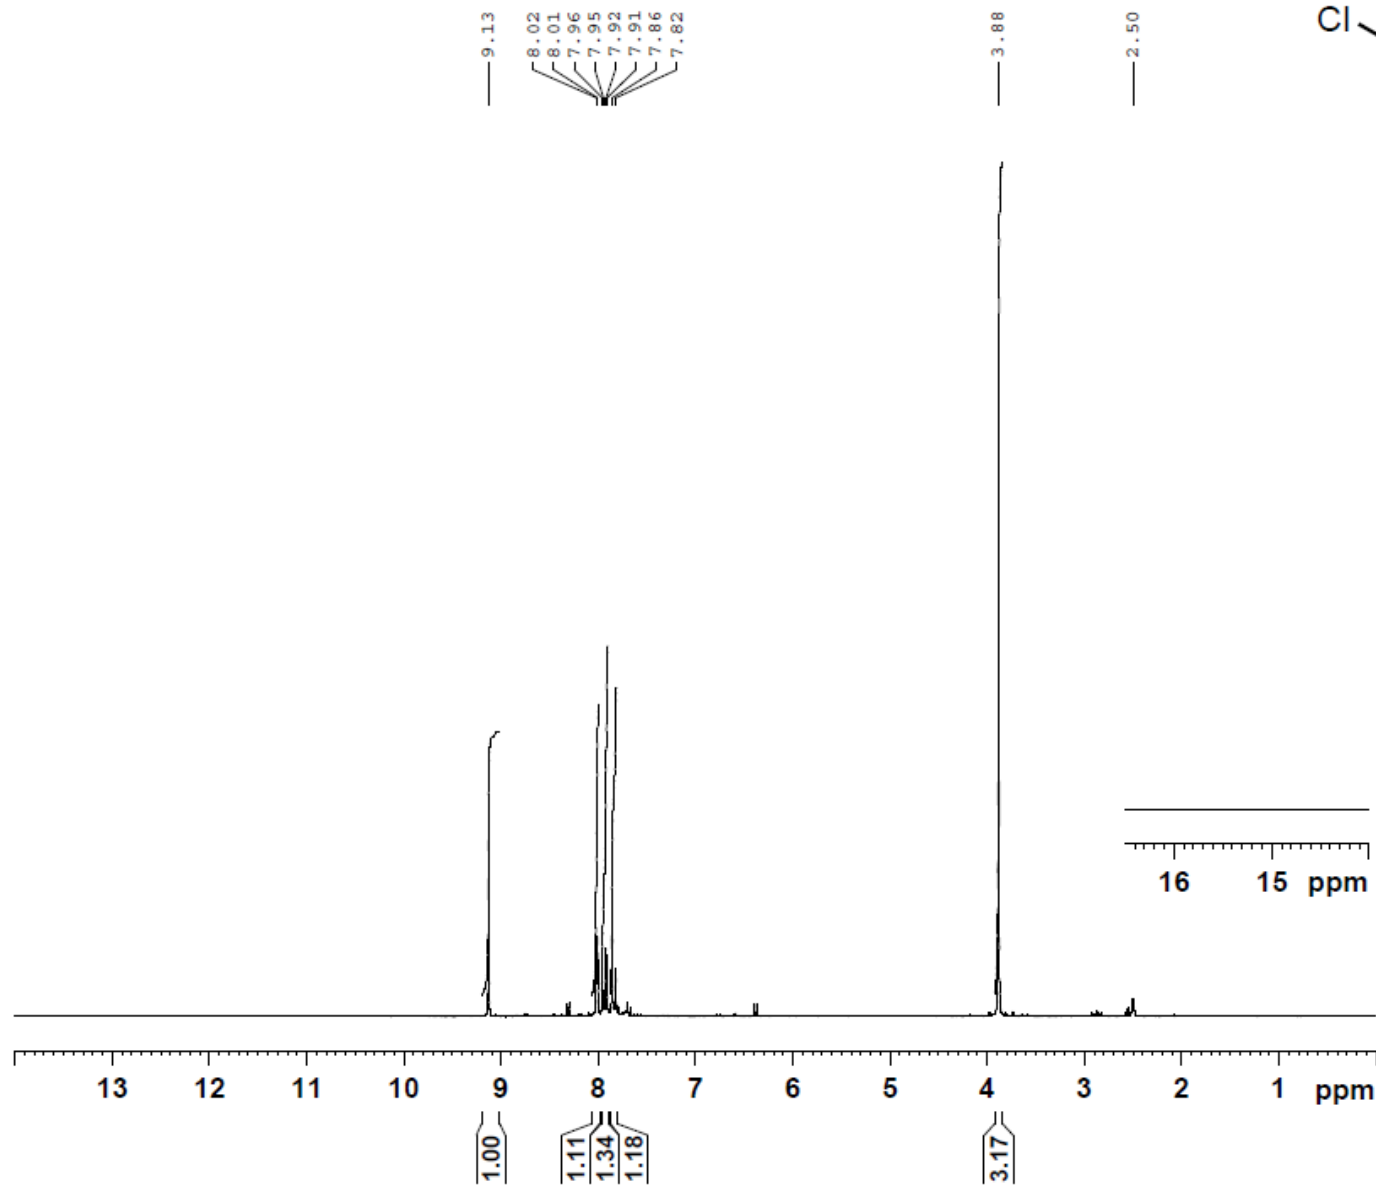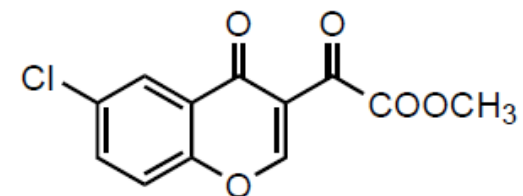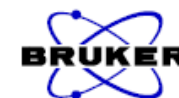

Current Data Parameters  
NAME 110525.213 IS-68  
EXPNO 12  
PROCNO 1

F2 - Acquisition Parameters  
Date\_ 20110526  
Time 5.21  
INSTRUM spect  
PROBHD 5 mm PABBO BB-  
PULPROG zg30  
TD 65536  
SOLVENT DMSO  
NS 16  
DS 2  
SWH 5165.289 Hz  
FIDRES 0.078816 Hz  
AQ 6.3439350 sec  
RG 362  
DW 96.800 usec  
DE 10.00 usec  
TE 298.1 K  
D1 1.00000000 sec  
TD0 1

===== CHANNEL f1 =====  
NUC1 1H  
P1 10.00 usec  
PL1 -2.50 dB  
SFO1 250.1315447 MHz

F2 - Processing parameters  
SI 32768  
SF 250.1299986 MHz  
WDW EM  
SSB 0  
LB 0.30 Hz  
GB 0  
PC 1.00

Savych IS-68 13C DMSO

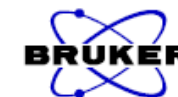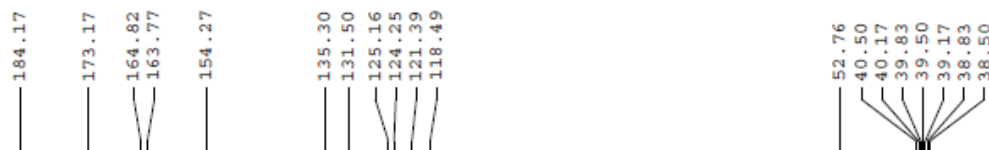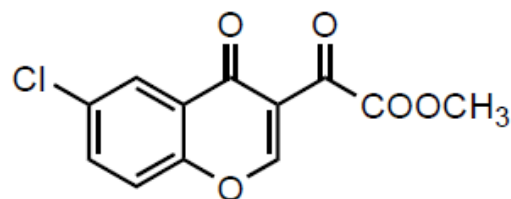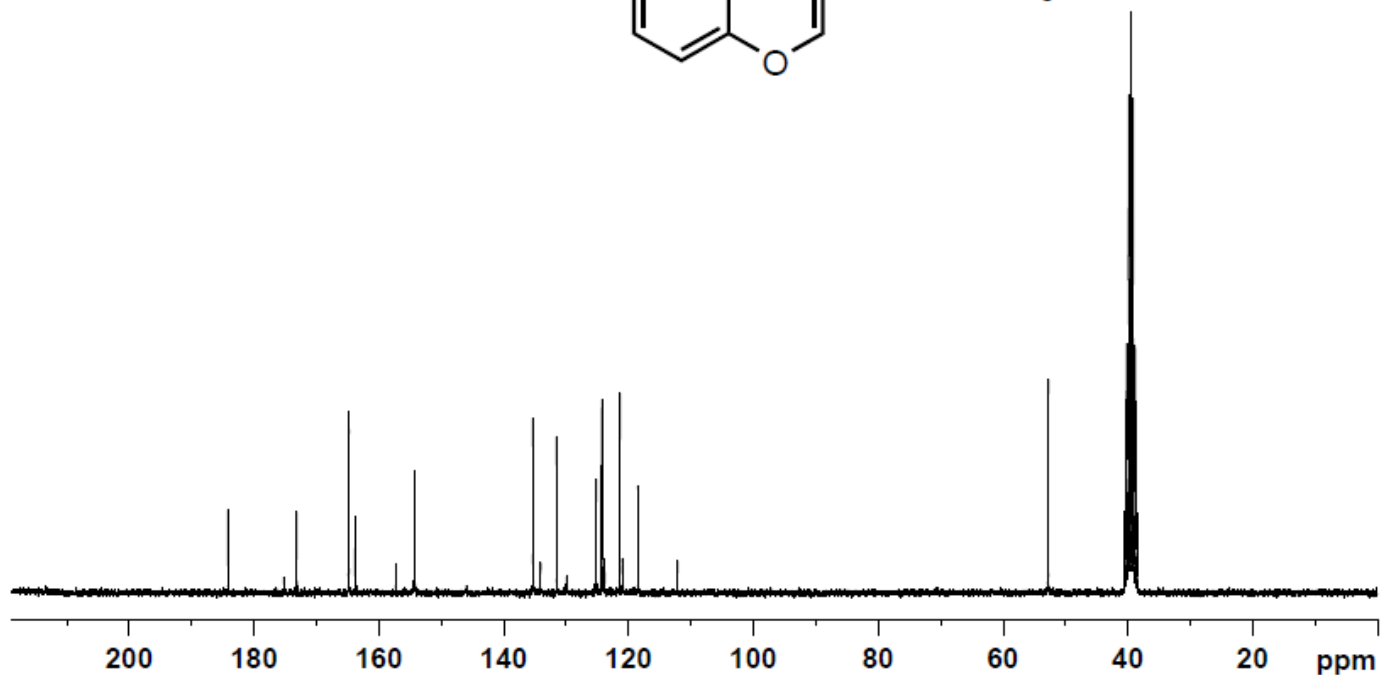

Current Data Parameters  
NAME 110525.213 IS-68  
EXPNO 10  
PROCNO 1

F2 - Acquisition Parameters  
Date\_ 20110526  
Time 4.58  
INSTRUM spect  
PROBHD 5 mm PABBO BB-  
PULPROG zgpg30  
TD 65536  
SOLVENT DMSO  
NS 1024  
DS 4  
SWH 15000.000 Hz  
FIDRES 0.228882 Hz  
AQ 2.1845834 sec  
RG 2050  
DW 33.333 usec  
DE 10.00 usec  
TE 298.7 K  
D1 2.0000000 sec  
d11 0.03000000 sec  
DELTA 1.89999998 sec  
TD0 1

===== CHANNEL f1 =====  
NUC1 13C  
P1 10.00 usec  
PL1 -1.00 dB  
SFO1 62.9015280 MHz

===== CHANNEL f2 =====  
CPDPRG2 waltz16  
NUC2 1H  
PCPD2 70.00 usec  
PL12 15.00 dB  
PL13 15.00 dB  
PL2 -2.50 dB  
SFO2 250.1310005 MHz

F2 - Processing parameters  
SI 32768  
SF 62.8952692 MHz  
WDW EM  
SSB 0  
LB 1.00 Hz  
GB 0  
PC 1.40

Savych IS-92 1H CDCl3

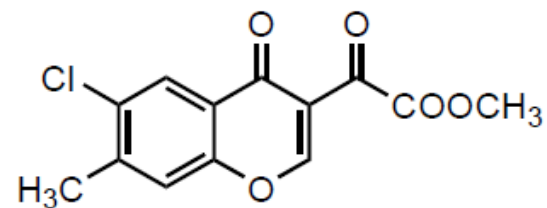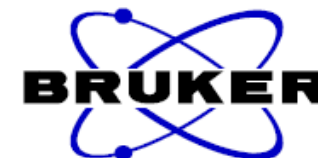

Current Data Parameters  
NAME 110408.u318 IS-92  
EXPNO 10  
PROCNO 1

F2 - Acquisition Parameters  
Date\_ 20110408  
Time 12.52  
INSTRUM spect  
PROBHD 5 mm PABBO BB-  
PULPROG zg30  
TD 65536  
SOLVENT CDCl3  
NS 16  
DS 2  
SWH 6188.119 Hz  
FIDRES 0.094423 Hz  
AQ 5.2953587 sec  
RG 144  
DW 80.800 usec  
DE 10.00 usec  
TE 298.2 K  
D1 1.00000000 sec  
TD0 1

===== CHANNEL f1 =====  
NUC1 1H  
P1 10.00 usec  
PL1 0.00 dB  
PL1W 11.25325108 W  
SFO1 300.1318534 MHz

F2 - Processing parameters  
SI 32768  
SF 300.1300087 MHz  
WDW EM  
SSB 0  
LB 0.30 Hz  
GB 0  
PC 1.00

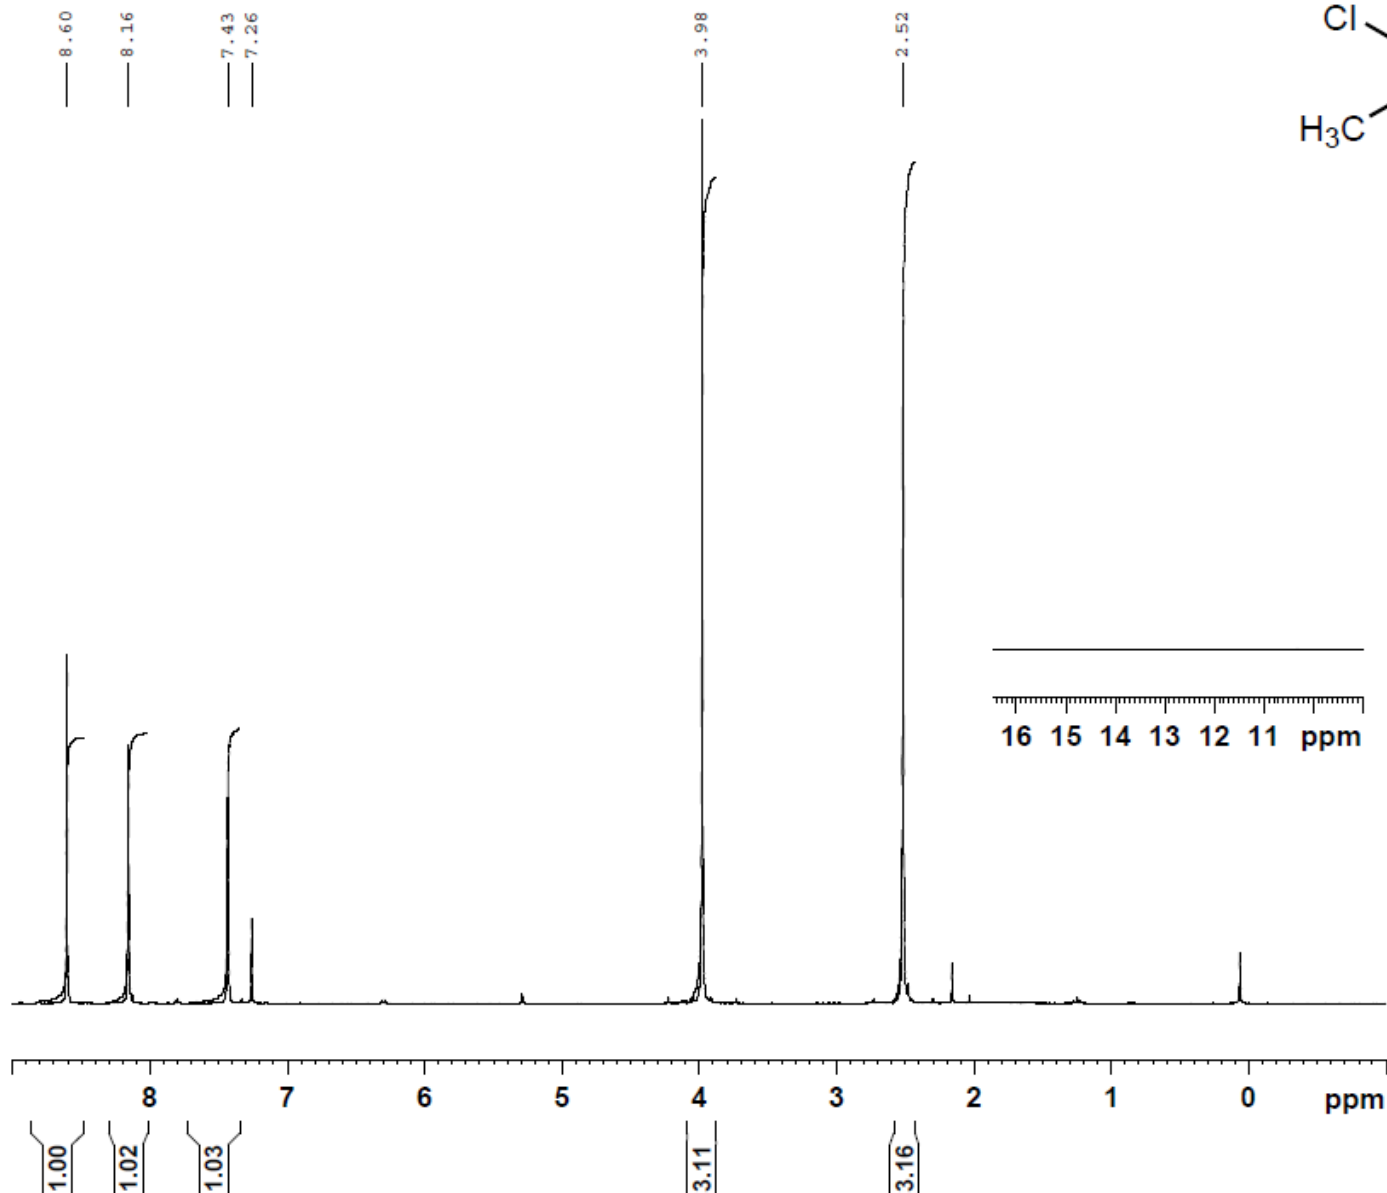

Savych IS-92 13C CDCl3

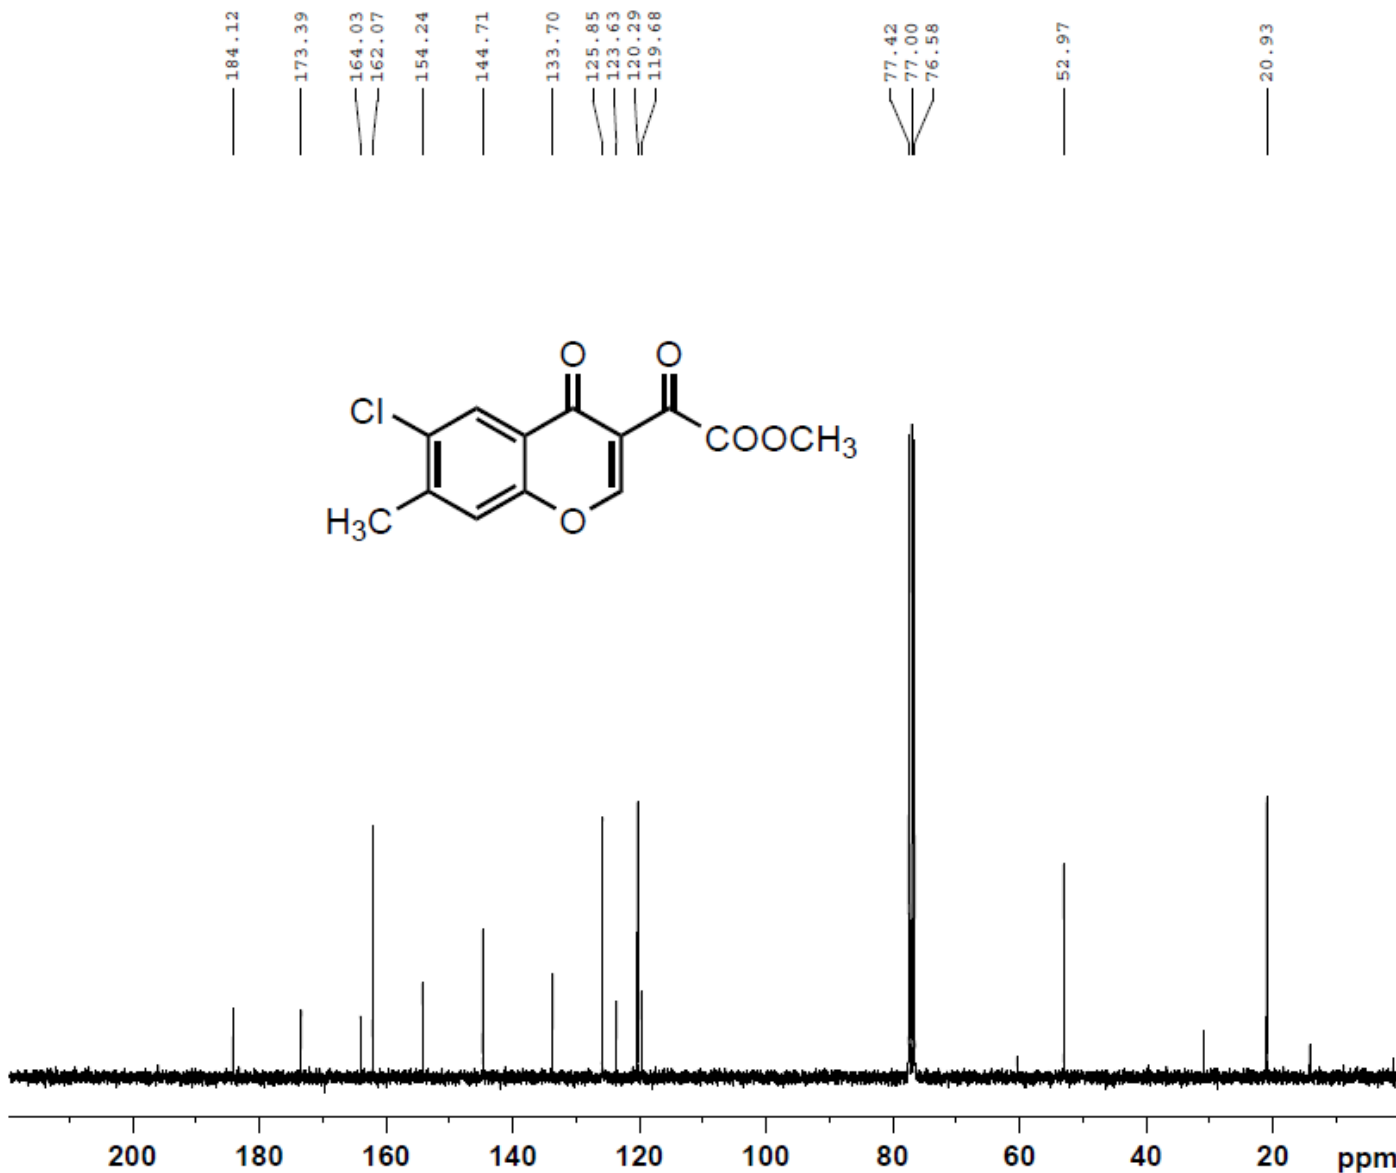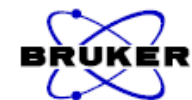

Current Data Parameters  
NAME 110408.u318 IS-92  
EXPNO 12  
PROCNO 1

F2 - Acquisition Parameters  
Date\_ 20110410  
Time 1.00  
INSTRUM spect  
PROBHD 5 mm PABBO BB-  
PULPROG zgpg30  
TD 65536  
SOLVENT CDCl3  
NS 512  
DS 4  
SWH 18028.846 Hz  
FIDRES 0.275098 Hz  
AQ 1.8175818 sec  
RG 2050  
DW 27.733 usec  
DE 10.00 usec  
TE 298.2 K  
D1 2.00000000 sec  
D11 0.03000000 sec  
TD0 1

===== CHANNEL f1 =====  
NUC1 13C  
P1 10.00 usec  
PL1 -0.50 dB  
PL1W 33.25691986 W  
SFO1 75.4752953 MHz

===== CHANNEL f2 =====  
CPDPRG2 waltz16  
NUC2 1H  
PCPD2 72.00 usec  
PL2 0.00 dB  
PL12 17.00 dB  
PL13 17.00 dB  
PL2W 11.25325108 W  
PL12W 0.22453187 W  
PL13W 0.22453187 W  
SFO2 300.1312005 MHz

F2 - Processing parameters  
SI 32768  
SF 75.4677520 MHz  
WDW EM  
SSB 0  
LB 1.00 Hz  
GB 0  
PC 1.40

Savych IS-10 1H DMSO

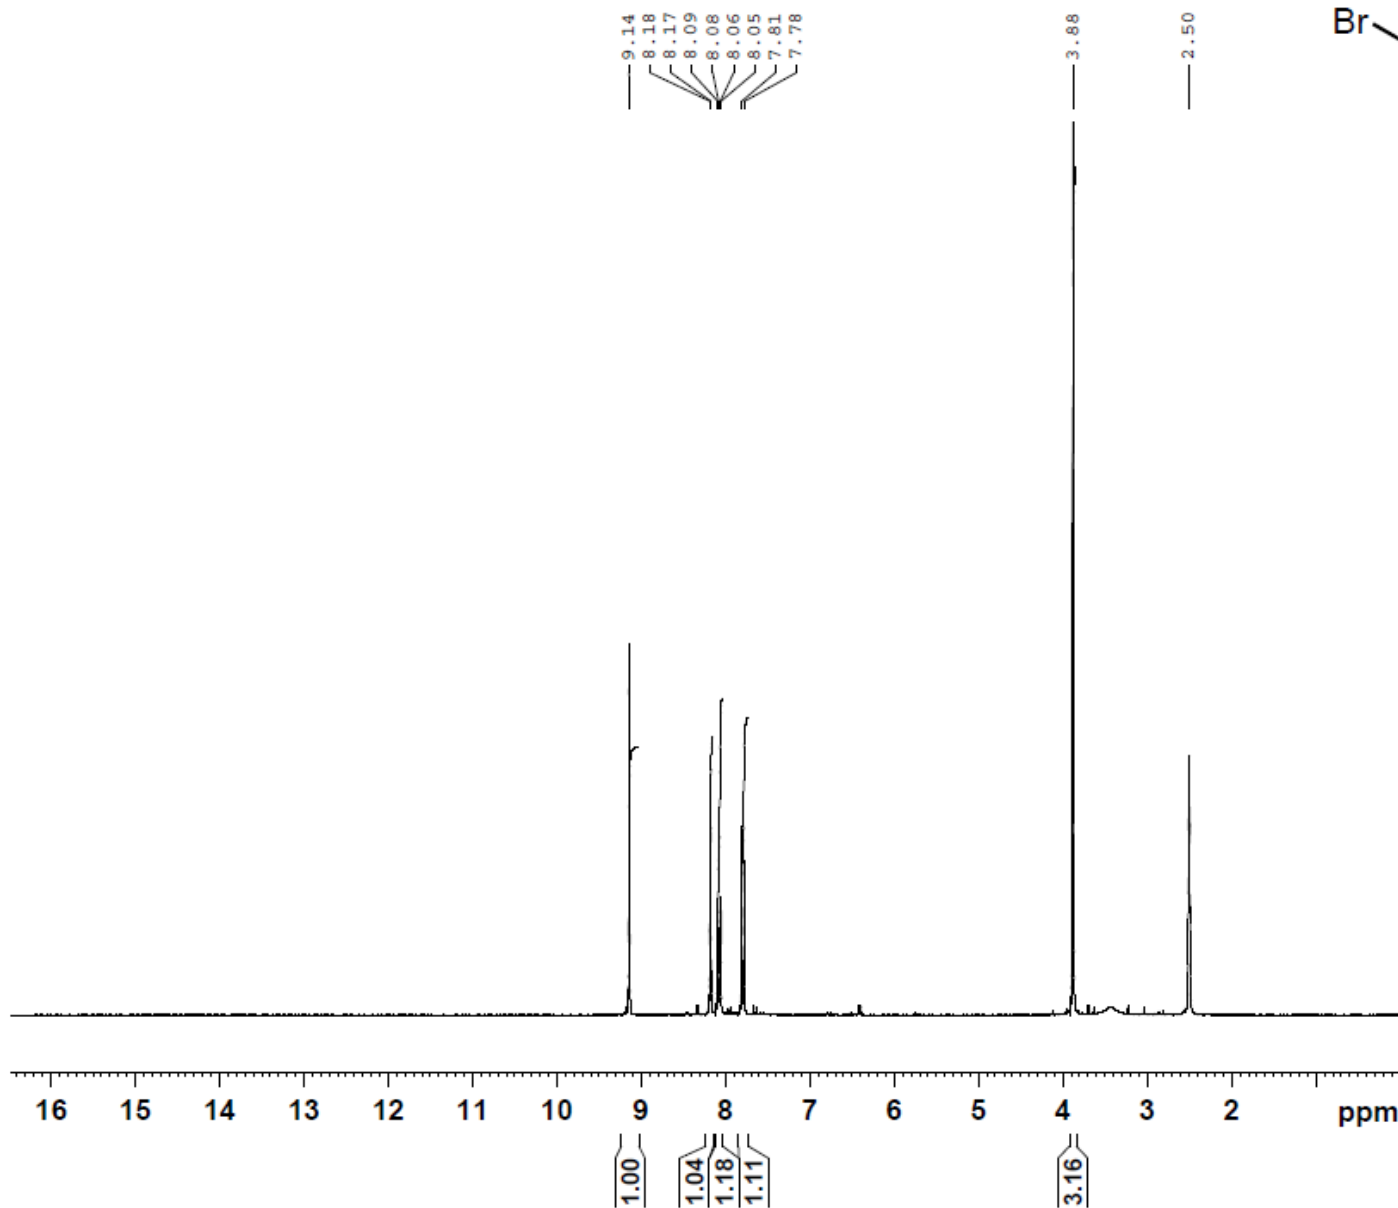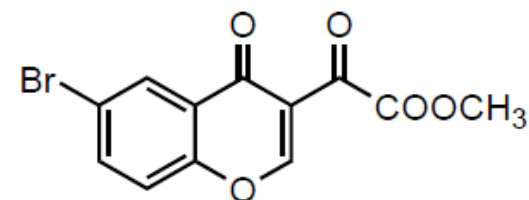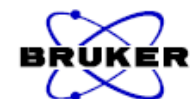

Current Data Parameters  
NAME 101207.u318 MM-10  
EXPNO 10  
PROCNO 1

F2 - Acquisition Parameters  
Date\_ 20101207  
Time 10.26  
INSTRUM spect  
PROBHD 5 mm PABBO BB-  
PULPROG zg30  
TD 65536  
SOLVENT DMSO  
NS 16  
DS 2  
SWH 6188.119 Hz  
FIDRES 0.094423 Hz  
AQ 5.2953587 sec  
RG 144  
DW 80.800 usec  
DE 10.00 usec  
TE 298.2 K  
D1 1.00000000 sec  
TD0 1

----- CHANNEL f1 -----  
NUC1 1H  
P1 10.00 usec  
PL1 0.00 dB  
PL1W 11.25325108 W  
SFO1 300.1318534 MHz

F2 - Processing parameters  
SI 32768  
SF 300.1300056 MHz  
WDW EM  
SSB 0  
LB 0.30 Hz  
GB 0  
PC 1.00

Savych IS-10 13C DMSO

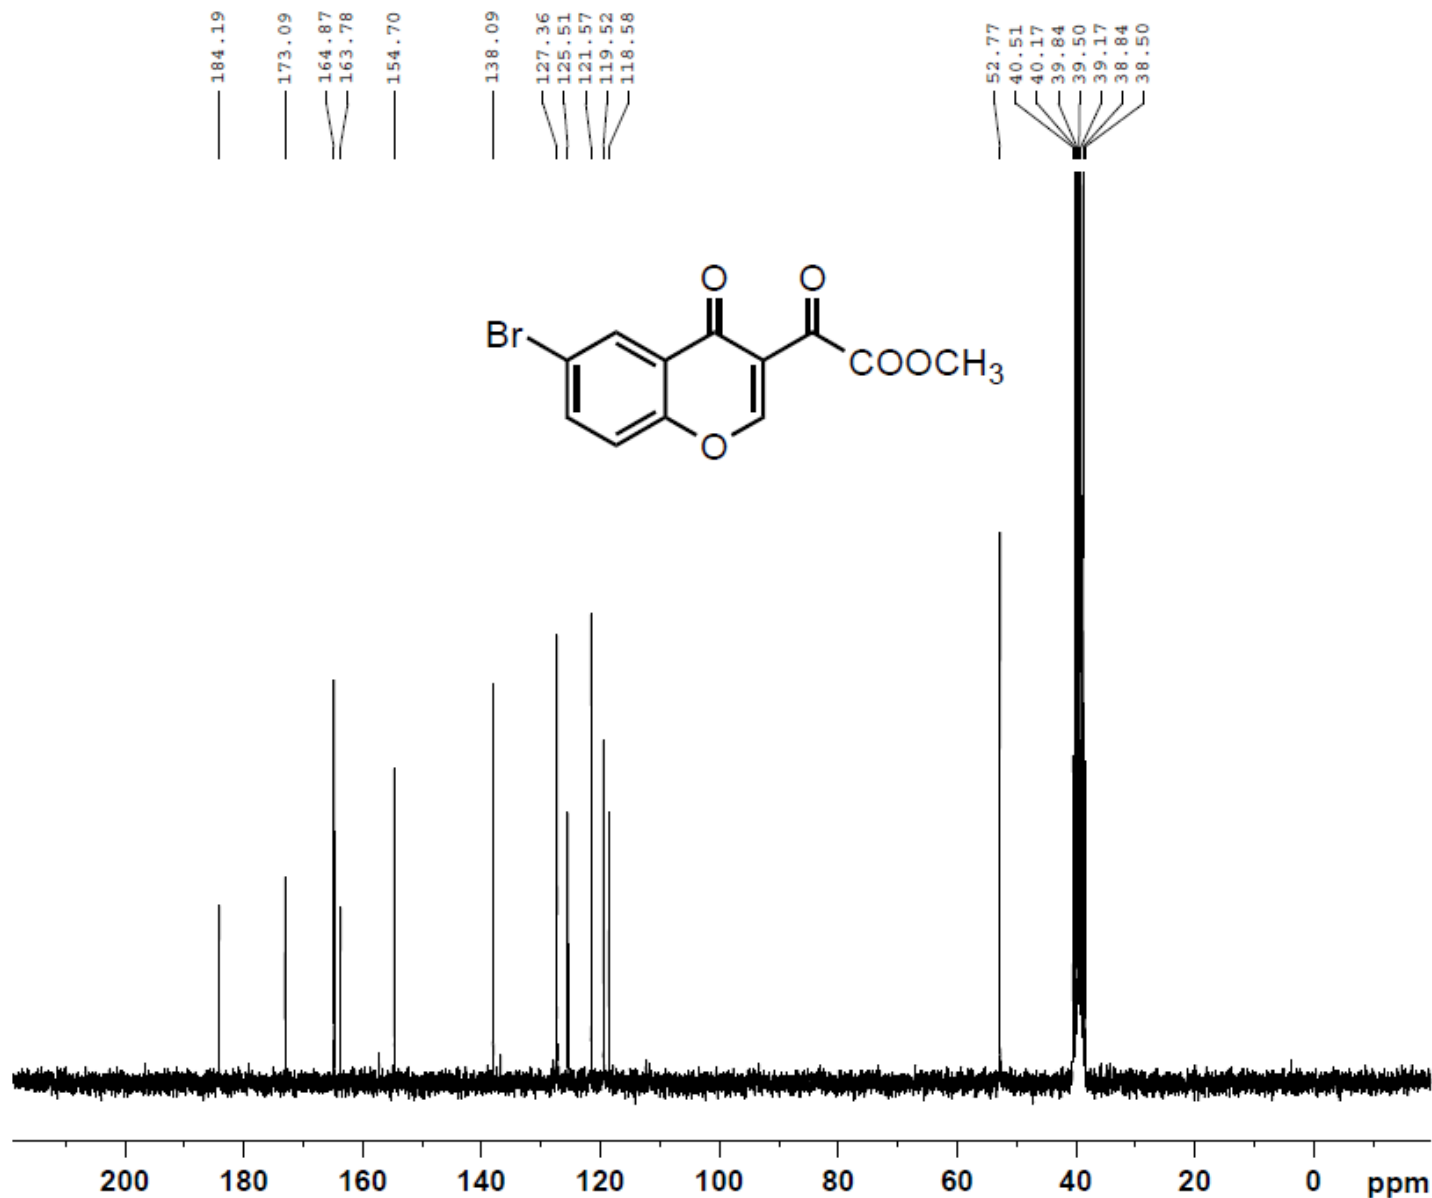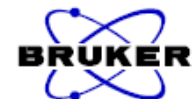

Current Data Parameters  
NAME 101207.213  
EXPNO 10  
PROCNO 1

F2 - Acquisition Parameters  
Date\_ 20101208  
Time 4.12  
INSTRUM spect  
PROBHD 5 mm PABBO BB-  
PULPROG zgpg30  
TD 65536  
SOLVENT DMSO  
NS 1024  
DS 4  
SWH 15000.000 Hz  
FIDRES 0.228882 Hz  
AQ 2.1845834 sec  
RG 2050  
DW 33.333 usec  
DE 10.00 usec  
TE 297.9 K  
D1 2.00000000 sec  
d11 0.03000000 sec  
DELTA 1.89999998 sec  
TD0 1

===== CHANNEL f1 =====  
NUC1 13C  
P1 10.00 usec  
PL1 -1.00 dB  
SFO1 62.9015280 MHz

===== CHANNEL f2 =====  
CPDPRG2 waltz16  
NUC2 1H  
PCPD2 70.00 usec  
PL12 15.00 dB  
PL13 15.00 dB  
PL2 -2.50 dB  
SFO2 250.1310005 MHz

F2 - Processing parameters  
SI 32768  
SF 62.8952692 MHz  
WDW EM  
SSB 0  
LB 1.00 Hz  
GB 0  
PC 1.40

Savych IS-107.12 1H CDCl3

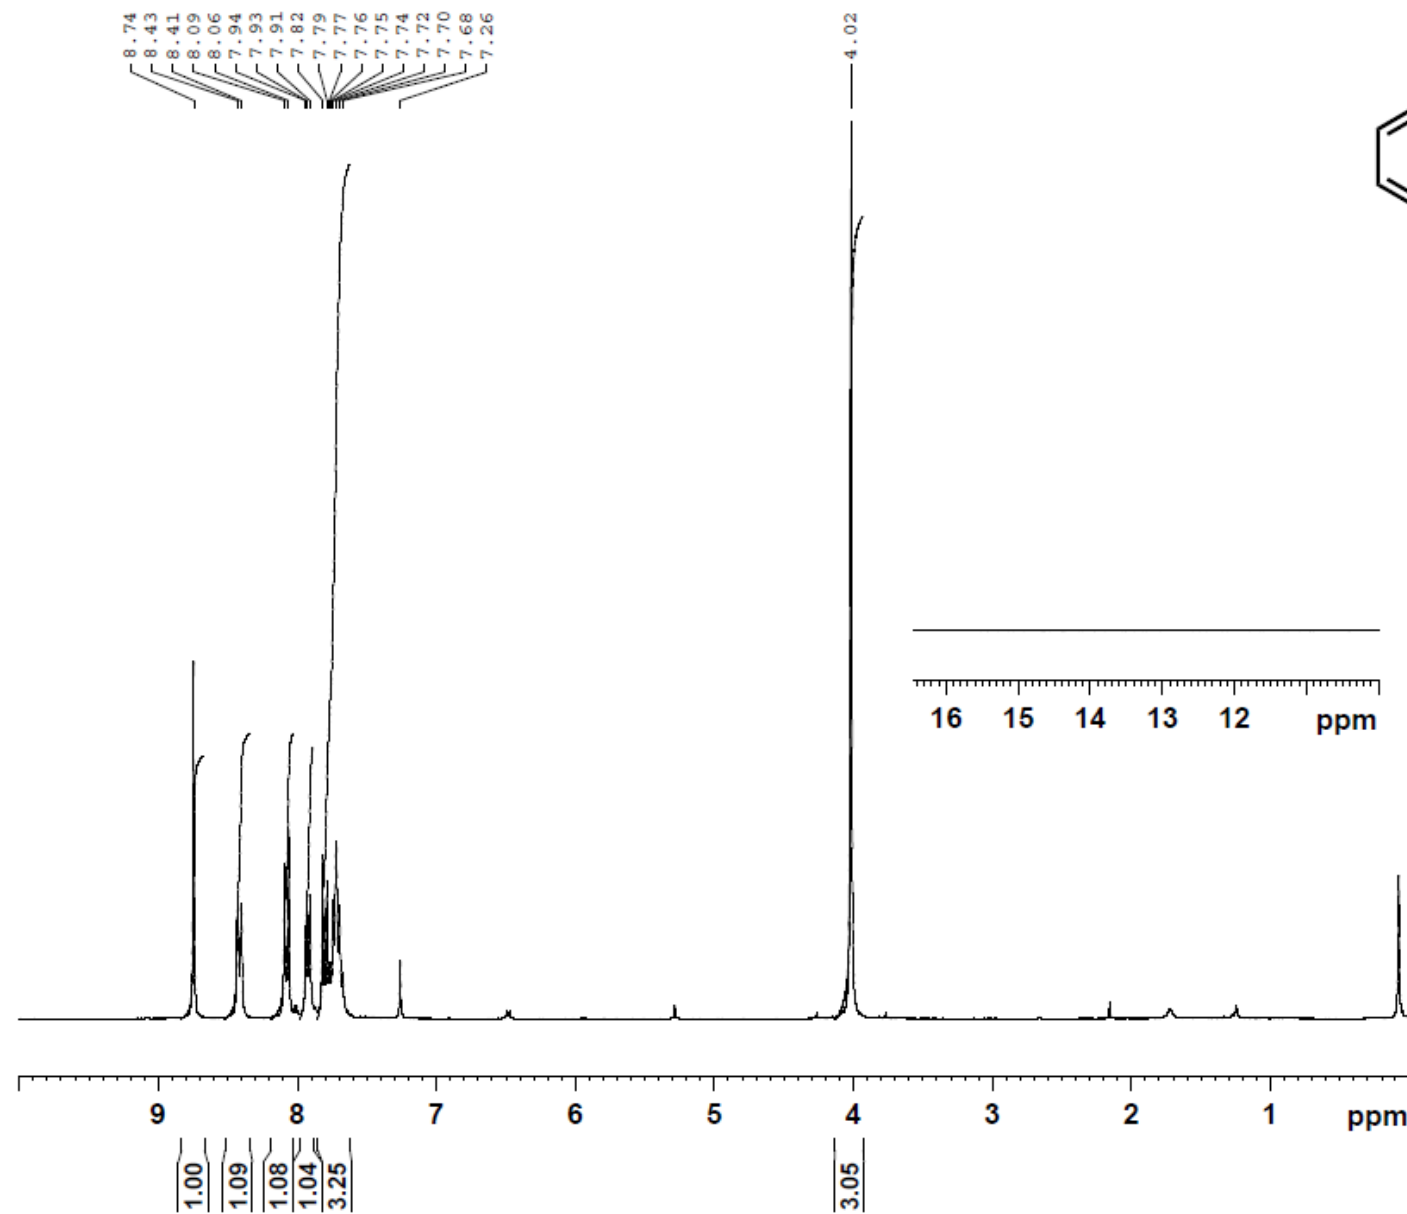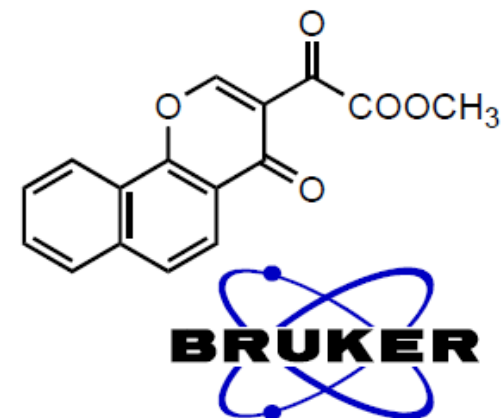

Current Data Parameters  
NAME 110510.u327 IS-107.12  
EXPNO 10  
PROCNO 1

F2 - Acquisition Parameters  
Date\_ 20110510  
Time 12.49  
INSTRUM spect  
PROBHD 5 mm PABBO BB-  
PULPROG zg30  
TD 65536  
SOLVENT CDCl3  
NS 16  
DS 2  
SWH 6188.119 Hz  
FIDRES 0.094423 Hz  
AQ 5.2953587 sec  
RG 114  
DW 80.800 usec  
DE 10.00 usec  
TE 298.5 K  
D1 1.00000000 sec  
TD0 1

===== CHANNEL f1 =====  
NUC1 1H  
P1 10.00 usec  
PL1 0.00 dB  
PL1W 11.25325108 W  
SFO1 300.1318534 MHz

F2 - Processing parameters  
SI 32768  
SF 300.1300102 MHz  
WDW EM  
SSB 0  
LB 0.30 Hz  
GB 0  
PC 1.00



Savych IS-107.12 13C CDCl3

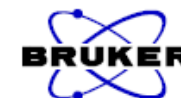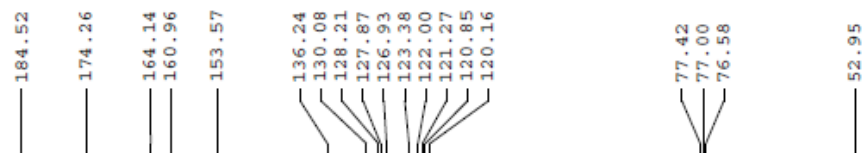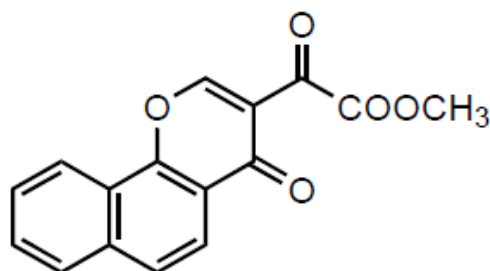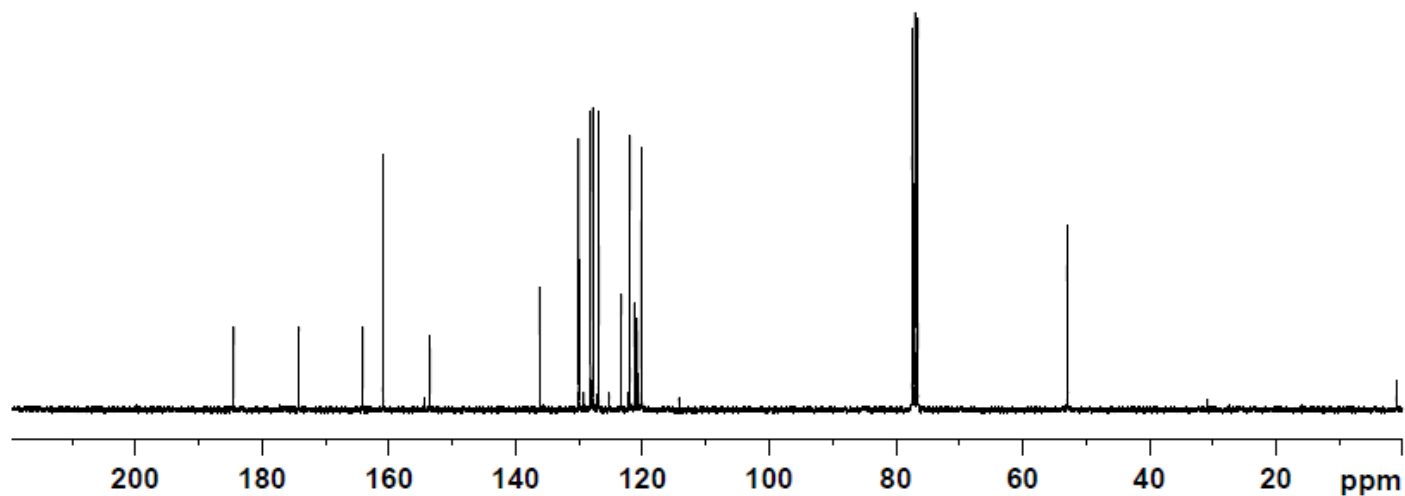

Current Data Parameters  
NAME 110511.u342 IS-107.12  
EXPNO 10  
PROCNO 1

F2 - Acquisition Parameters  
Date\_ 20110511  
Time 16.34  
INSTRUM spect  
PROBHD 5 mm PABBO BB-  
PULPROG zgpg30  
TD 65536  
SOLVENT CDCl3  
NS 1024  
DS 4  
SWH 18028.846 Hz  
FIDRES 0.275098 Hz  
AQ 1.8175818 sec  
RG 2050  
DW 27.733 usec  
DE 10.00 usec  
TE 299.9 K  
D1 2.00000000 sec  
D11 0.03000000 sec  
TD0 1

===== CHANNEL f1 =====  
NUC1 13C  
P1 10.00 usec  
PL1 -0.50 dB  
PL1W 33.25691986 W  
SFO1 75.4752953 MHz

===== CHANNEL f2 =====  
CPDPRG2 waltz16  
NUC2 1H  
PCPD2 72.00 usec  
PL2 0.00 dB  
PL12 17.00 dB  
PL13 17.00 dB  
PL2W 11.25325108 W  
PL12W 0.22453187 W  
PL13W 0.22453187 W  
SFO2 300.1312005 MHz

F2 - Processing parameters  
SI 32768  
SF 75.4677542 MHz  
WDW EM  
SSB 0  
LB 1.00 Hz  
GB 0  
PC 1.40

Savych IS-194 1H DMSO

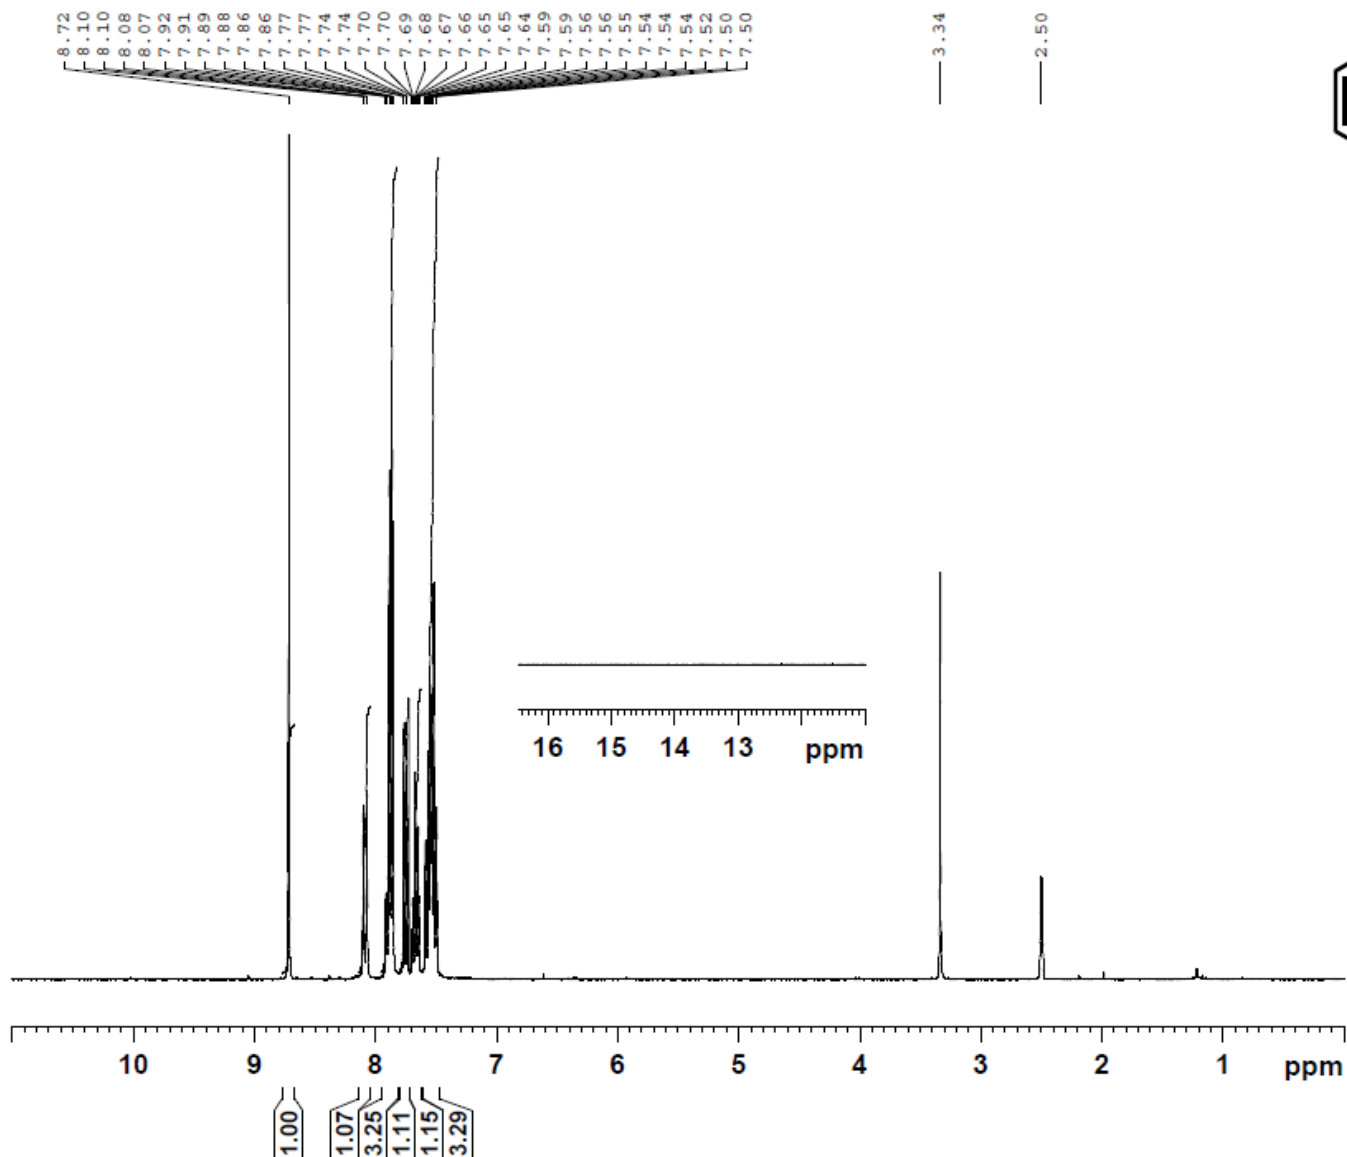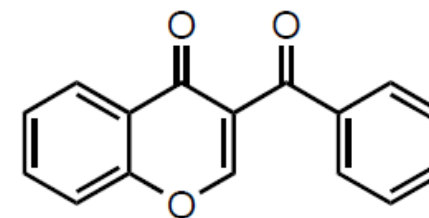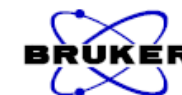

Current Data Parameters  
NAME 120119.u326 IS-194  
EXPNO 10  
PROCNO 1

F2 - Acquisition Parameters  
Date\_ 20120119  
Time 14.09  
INSTRUM spect  
PROBHD 5 mm PABBO BB-  
PULPROG zg30  
TD 65536  
SOLVENT DMSO  
NS 16  
DS 2  
SWH 6188.119 Hz  
FIDRES 0.094423 Hz  
AQ 5.2953587 sec  
RG 144  
DW 80.800 usec  
DE 10.00 usec  
TE 298.2 K  
D1 1.00000000 sec  
TD0 1

===== CHANNEL f1 =====  
NUC1 1H  
P1 10.00 usec  
PL1 0.00 dB  
PL1W 11.25325108 W  
SFO1 300.1318534 MHz

F2 - Processing parameters  
SI 32768  
SF 300.1300062 MHz  
WDW EM  
SSB 0  
LB 0.30 Hz  
GB 0  
PC 1.00

Savych IS-194 13C DMSO

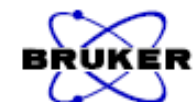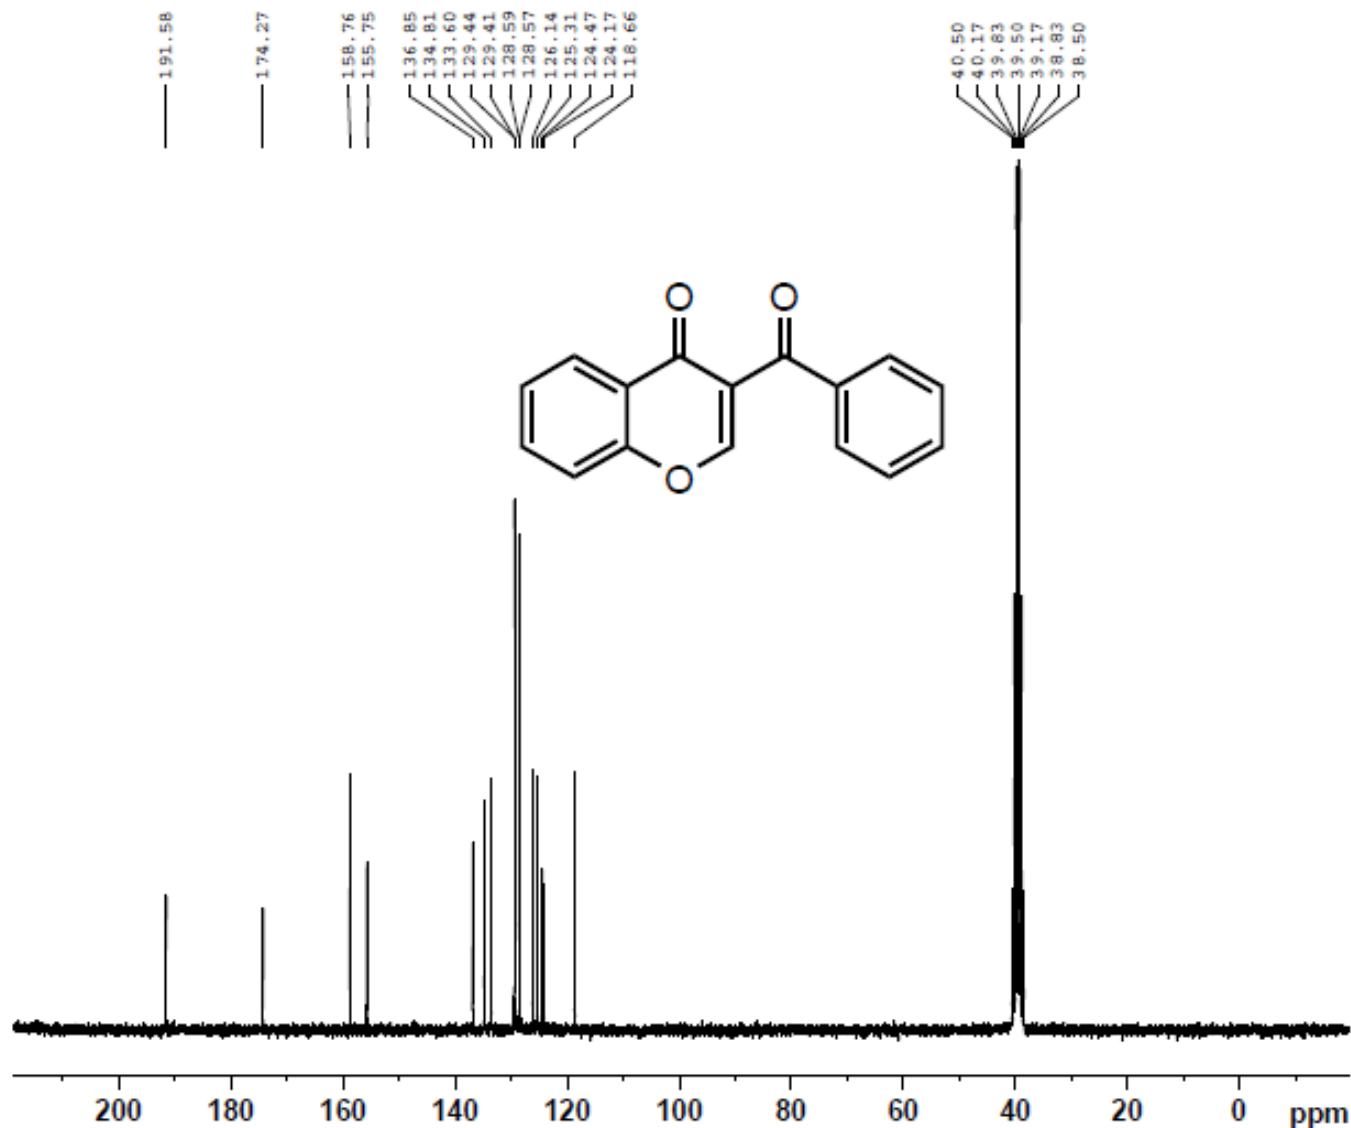

Current Data Parameters  
NAME 120119.210  
EXPNO 10  
PROCNO 1

F2 - Acquisition Parameters  
Date\_ 20120120  
Time 4.48  
INSTRUM spect  
PROBHD 5 mm QNP 1H/13  
PULPROG zgpg30  
TD 65536  
SOLVENT DMSO  
NS 1024  
DS 4  
SWH 15000.000 Hz  
FIDRES 0.228882 Hz  
AQ 2.1845834 sec  
RG 2050  
DW 33.333 usec  
DE 10.00 usec  
TE 298.2 K  
D1 2.00000000 sec  
d11 0.03000000 sec  
DELTA 1.89999998 sec  
TD0 1

==== CHANNEL f1 =====  
NUC1 13C  
P1 10.20 usec  
PL1 0.00 dB  
SFO1 62.9015280 MHz

==== CHANNEL f2 =====  
CPDPRG2 waltz16  
NUC2 1H  
PCPD2 70.00 usec  
PL12 14.00 dB  
PL13 14.00 dB  
PL2 -3.00 dB  
SFO2 250.1310005 MHz

F2 - Processing parameters  
SI 32768  
SF 62.8952687 MHz  
WDW EM  
SSB 0  
LB 1.00 Hz  
GB 0  
PC 1.40

Savych IS-59 1H CDCl3

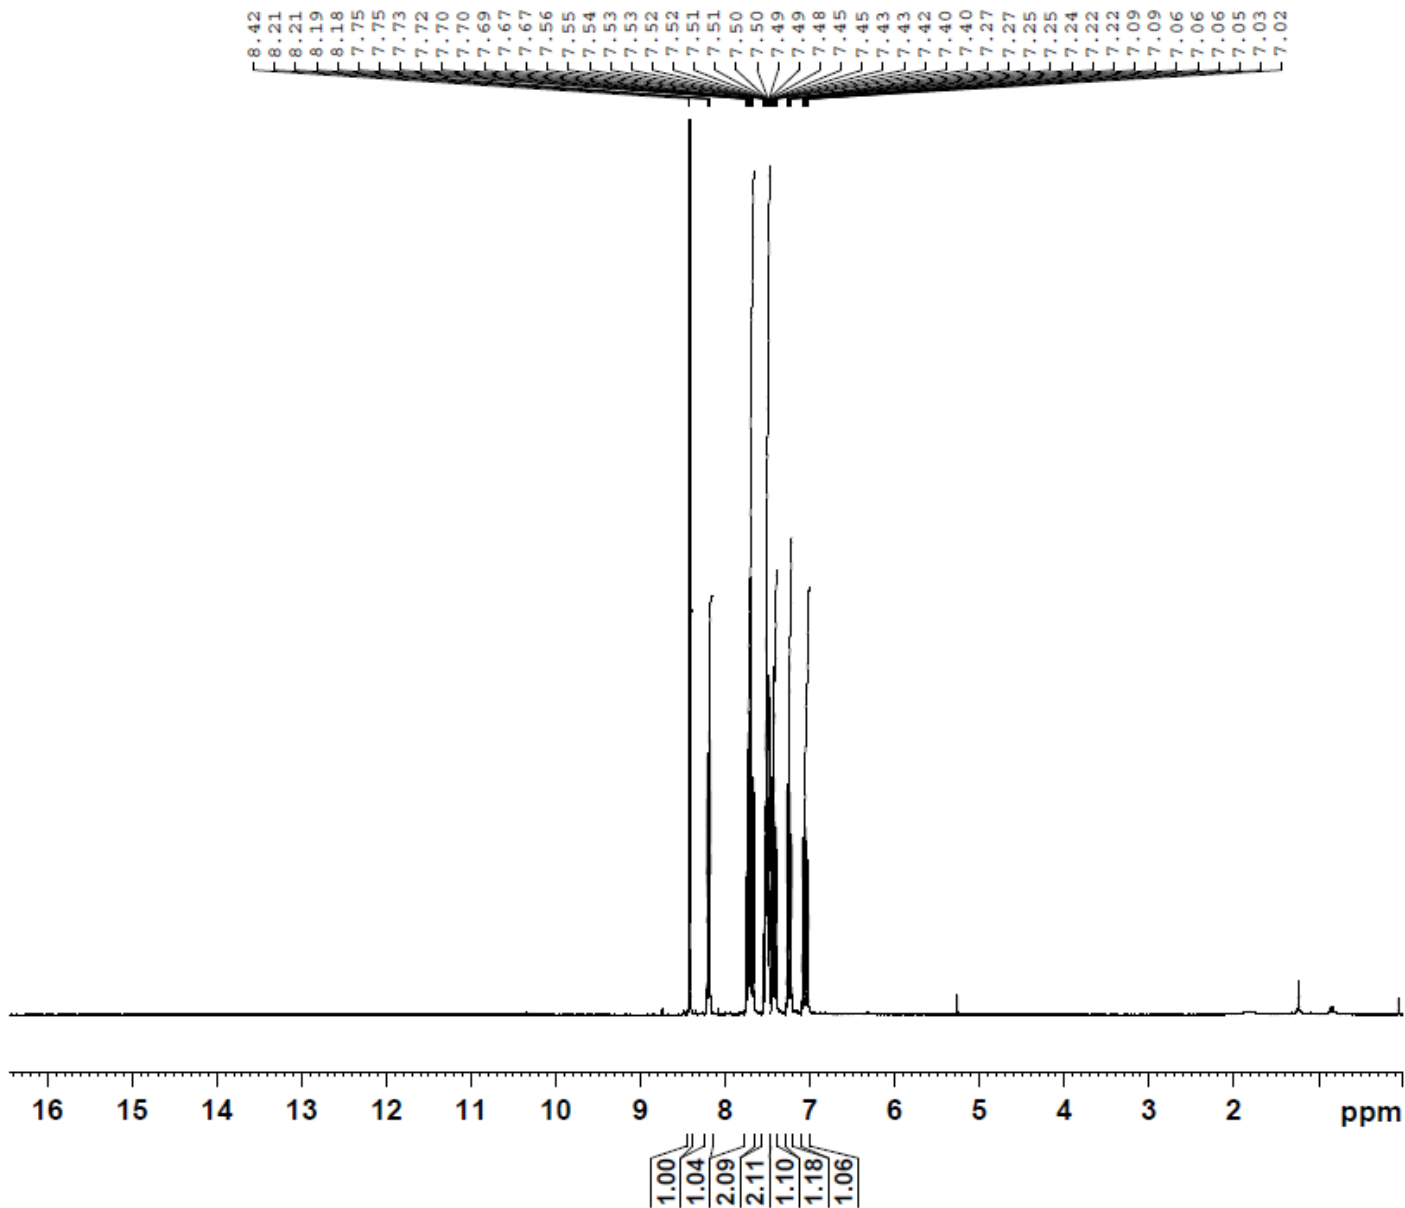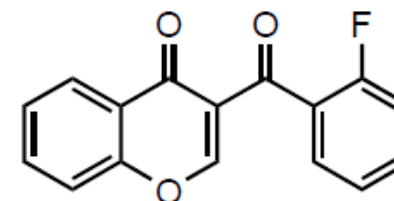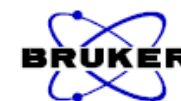

Current Data Parameters  
NAME 110407.u321 SM-459  
EXPNO 10  
PROCNO 1

F2 - Acquisition Parameters  
Date\_ 20110407  
Time 11.50  
INSTRUM spect  
PROBHD 5 mm PABBO BB-  
PULPROG zg30  
TD 65536  
SOLVENT CDCl3  
NS 16  
DS 2  
SWH 6188.119 Hz  
FIDRES 0.094423 Hz  
AQ 5.2953587 sec  
RG 128  
DW 80.800 usec  
DE 10.00 usec  
TE 298.2 K  
D1 1.00000000 sec  
TD0 1

===== CHANNEL f1 =====  
NUC1 1H  
P1 10.00 usec  
PL1 0.00 dB  
PL1W 11.25325108 W  
SFO1 300.1318534 MHz

F2 - Processing parameters  
SI 32768  
SF 300.1300139 MHz  
WDW EM  
SSB 0  
LB 0.30 Hz  
GB 0  
PC 1.00

Savych IS-59 13C CDCl3

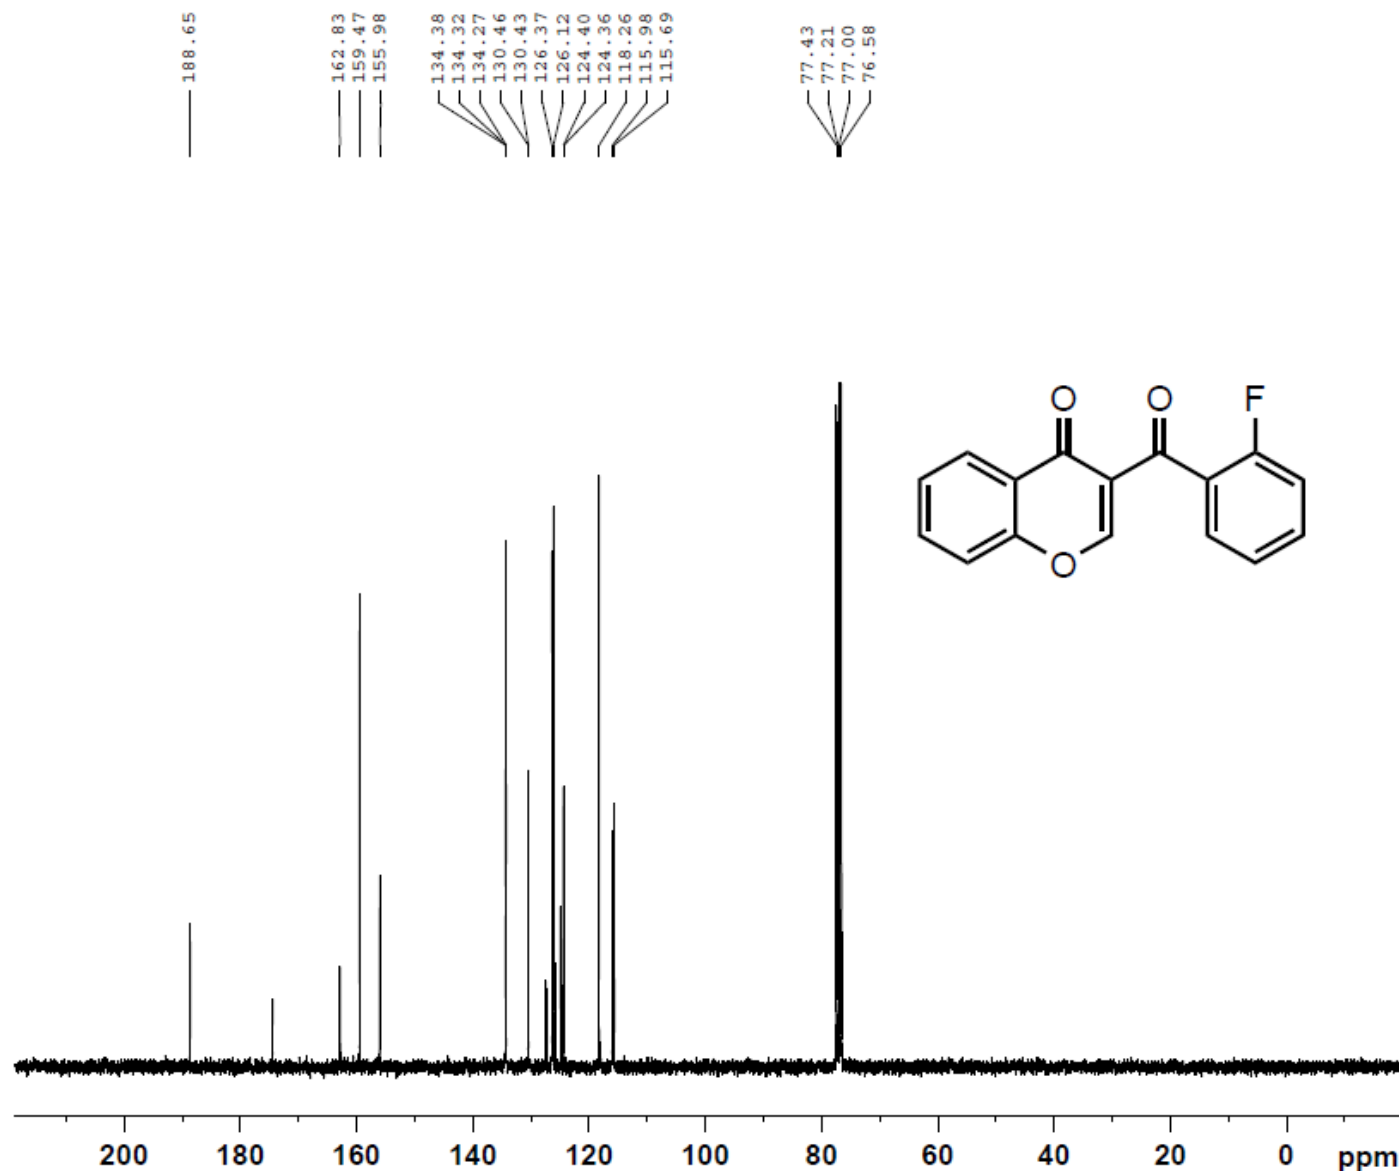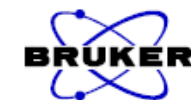

Current Data Parameters  
NAME 110407.u321 SM-459  
EXPNO 12  
PROCNO 1

F2 - Acquisition Parameters  
Date\_ 20110408  
Time 2.59  
INSTRUM spect  
PROBHD 5 mm PABBO BB-  
PULPROG zgpg30  
TD 65536  
SOLVENT CDCl3  
NS 512  
DS 4  
SWH 18028.846 Hz  
FIDRES 0.275098 Hz  
AQ 1.8175818 sec  
RG 2050  
DW 27.733 usec  
DE 10.00 usec  
TE 298.2 K  
D1 2.00000000 sec  
D11 0.03000000 sec  
TD0 1

===== CHANNEL f1 =====  
NUC1 13C  
P1 10.00 usec  
PL1 -0.50 dB  
PL1W 33.25691986 W  
SFO1 75.4752953 MHz

===== CHANNEL f2 =====  
CPDPRG2 waltz16  
NUC2 1H  
PCPD2 72.00 usec  
PL2 0.00 dB  
PL12 17.00 dB  
PL13 17.00 dB  
PL2W 11.25325108 W  
PL12W 0.22453187 W  
PL13W 0.22453187 W  
SFO2 300.1312005 MHz

F2 - Processing parameters  
SI 32768  
SF 75.4677536 MHz  
WDW EM  
SSB 0  
LB 1.00 Hz  
GB 0  
PC 1.40

I. Savch, IS- 148, DMSO, 1H

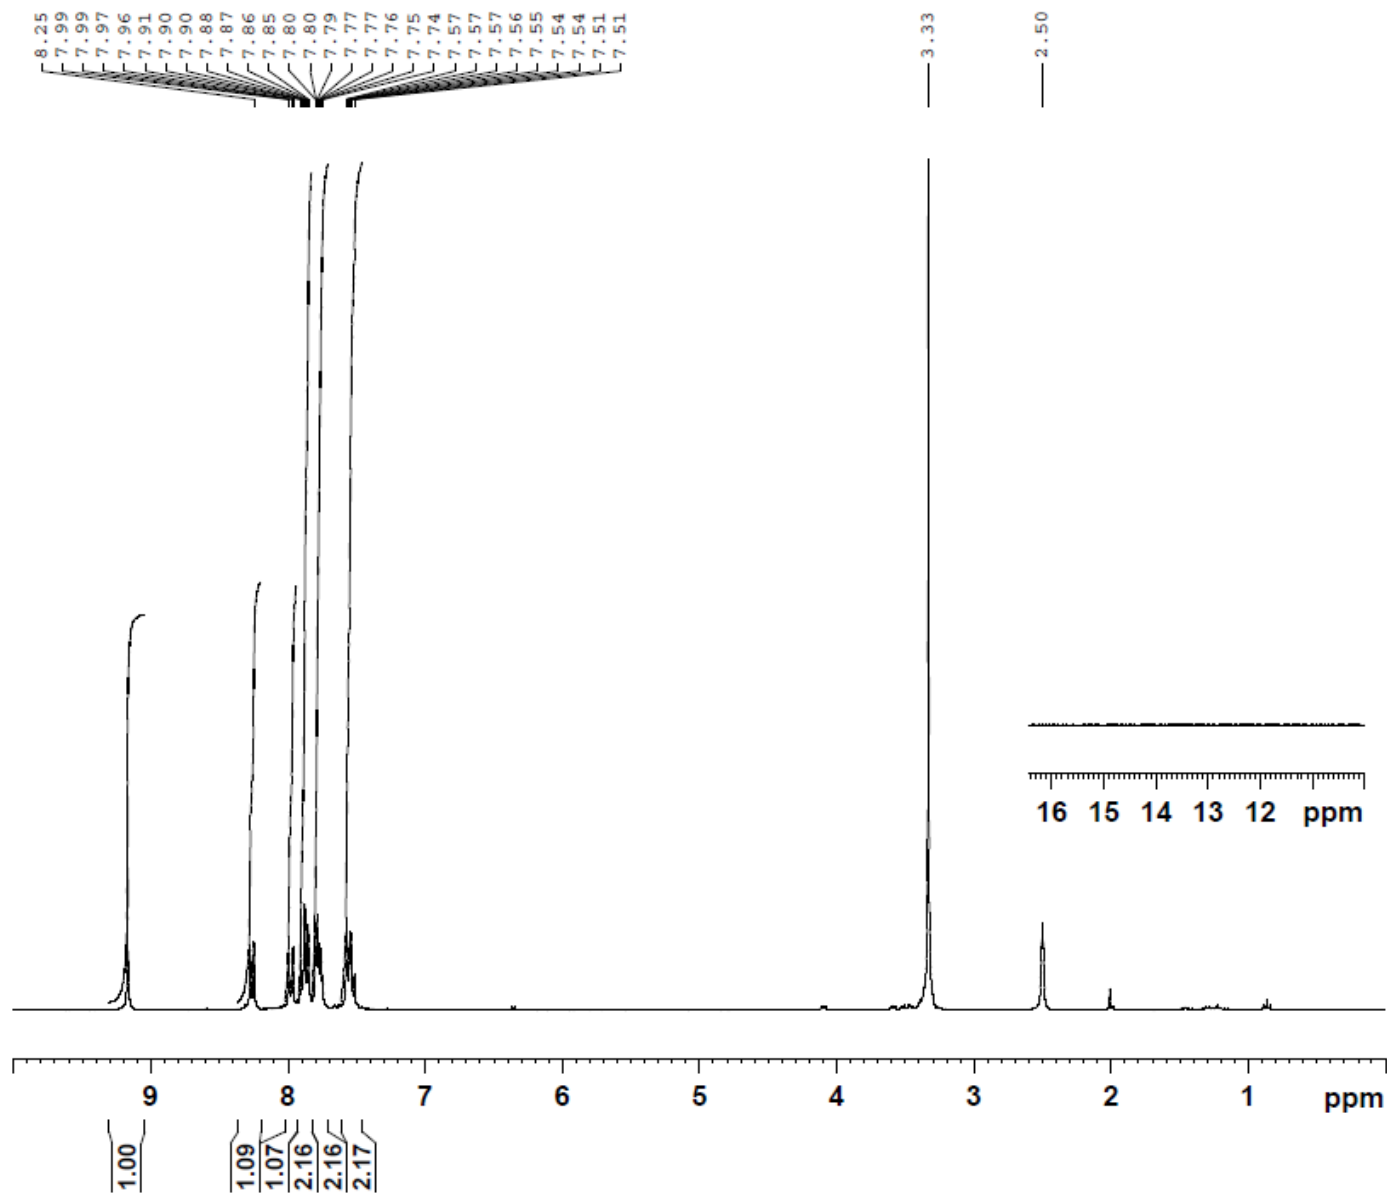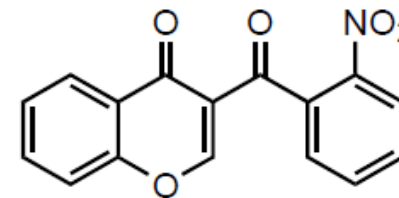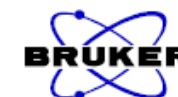

Current Data Parameters  
NAME 110805.u307 IS-148  
EXPNO 10  
PROCNO 1

F2 - Acquisition Parameters  
Date\_ 20110805  
Time 9.20  
INSTRUM spect  
PROBHD 5 mm PABBO BB-  
PULPROG zg30  
TD 65536  
SOLVENT DMSO  
NS 16  
DS 2  
SWH 6188.119 Hz  
FIDRES 0.094423 Hz  
AQ 5.2953587 sec  
RG 144  
DW 80.800 usec  
DE 10.00 usec  
TE 298.2 K  
D1 1.00000000 sec  
TD0 1

===== CHANNEL f1 =====  
NUC1 1H  
P1 10.00 usec  
PL1 0.00 dB  
PL1W 11.25325108 W  
SFO1 300.1318534 MHz

F2 - Processing parameters  
SI 32768  
SF 300.1300111 MHz  
WDW EM  
SSB 0  
LB 0.30 Hz  
GB 0  
PC 1.00

Savych, IS-148, DMSO, 13C

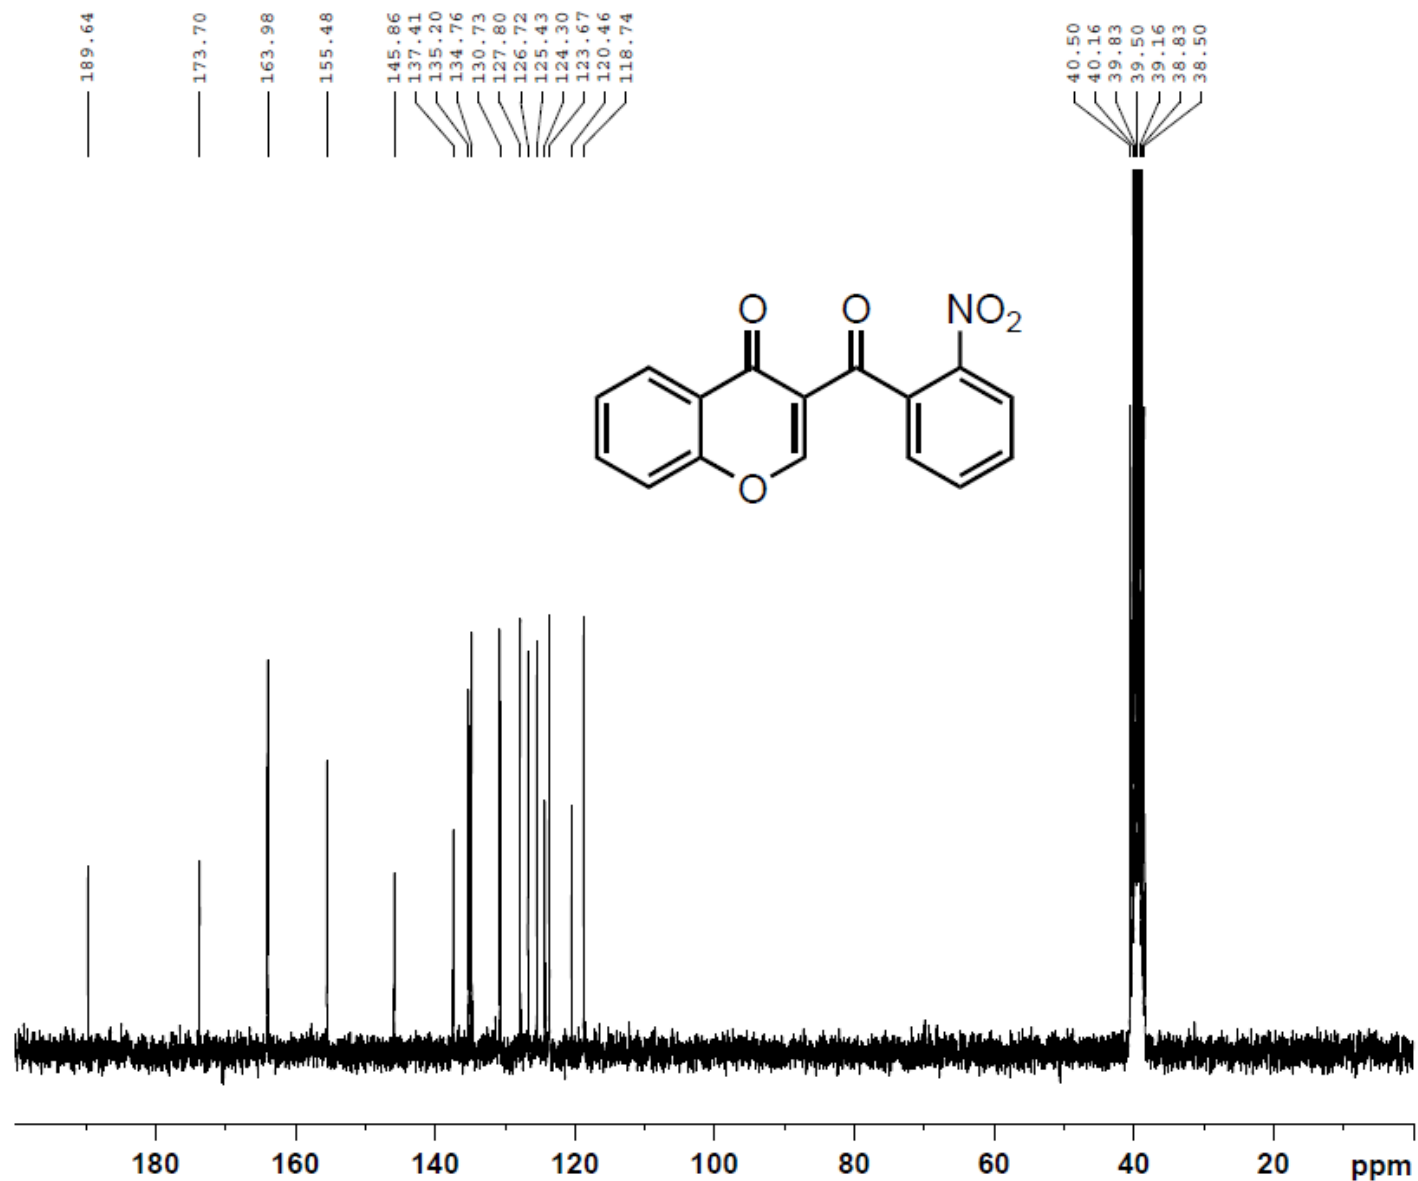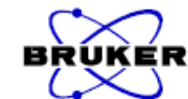

Current Data Parameters

NAME 110805.202 IS-148  
EXPNO 10  
PROCNO 1

F2 - Acquisition Parameters

Date\_ 20110805  
Time 13.15  
INSTRUM spect  
PROBHD 5 mm PABBO BB-  
PULPROG zgpg30  
TD 65536  
SOLVENT DMSO  
NS 1500  
DS 4  
SWH 15000.000 Hz  
FIDRES 0.228882 Hz  
AQ 2.1845834 sec  
RG 2050  
DW 33.333 usec  
DE 10.00 usec  
TE 298.1 K  
D1 2.00000000 sec  
d11 0.03000000 sec  
DELTA 1.89999998 sec  
TD0 1

===== CHANNEL f1 =====

NUC1 13C  
P1 10.00 usec  
PL1 -1.00 dB  
SFO1 62.9015280 MHz

===== CHANNEL f2 =====

CPDPRG2 waltz16  
NUC2 1H  
PCPD2 70.00 usec  
PL12 15.00 dB  
PL13 15.00 dB  
PL2 -2.50 dB  
SFO2 250.1310005 MHz

F2 - Processing parameters

SI 32768  
SF 62.8952692 MHz  
WDW EM  
SSB 0  
LB 1.00 Hz  
GB 0  
PC 1.40

Savych, IS-150, DMSO, 1H

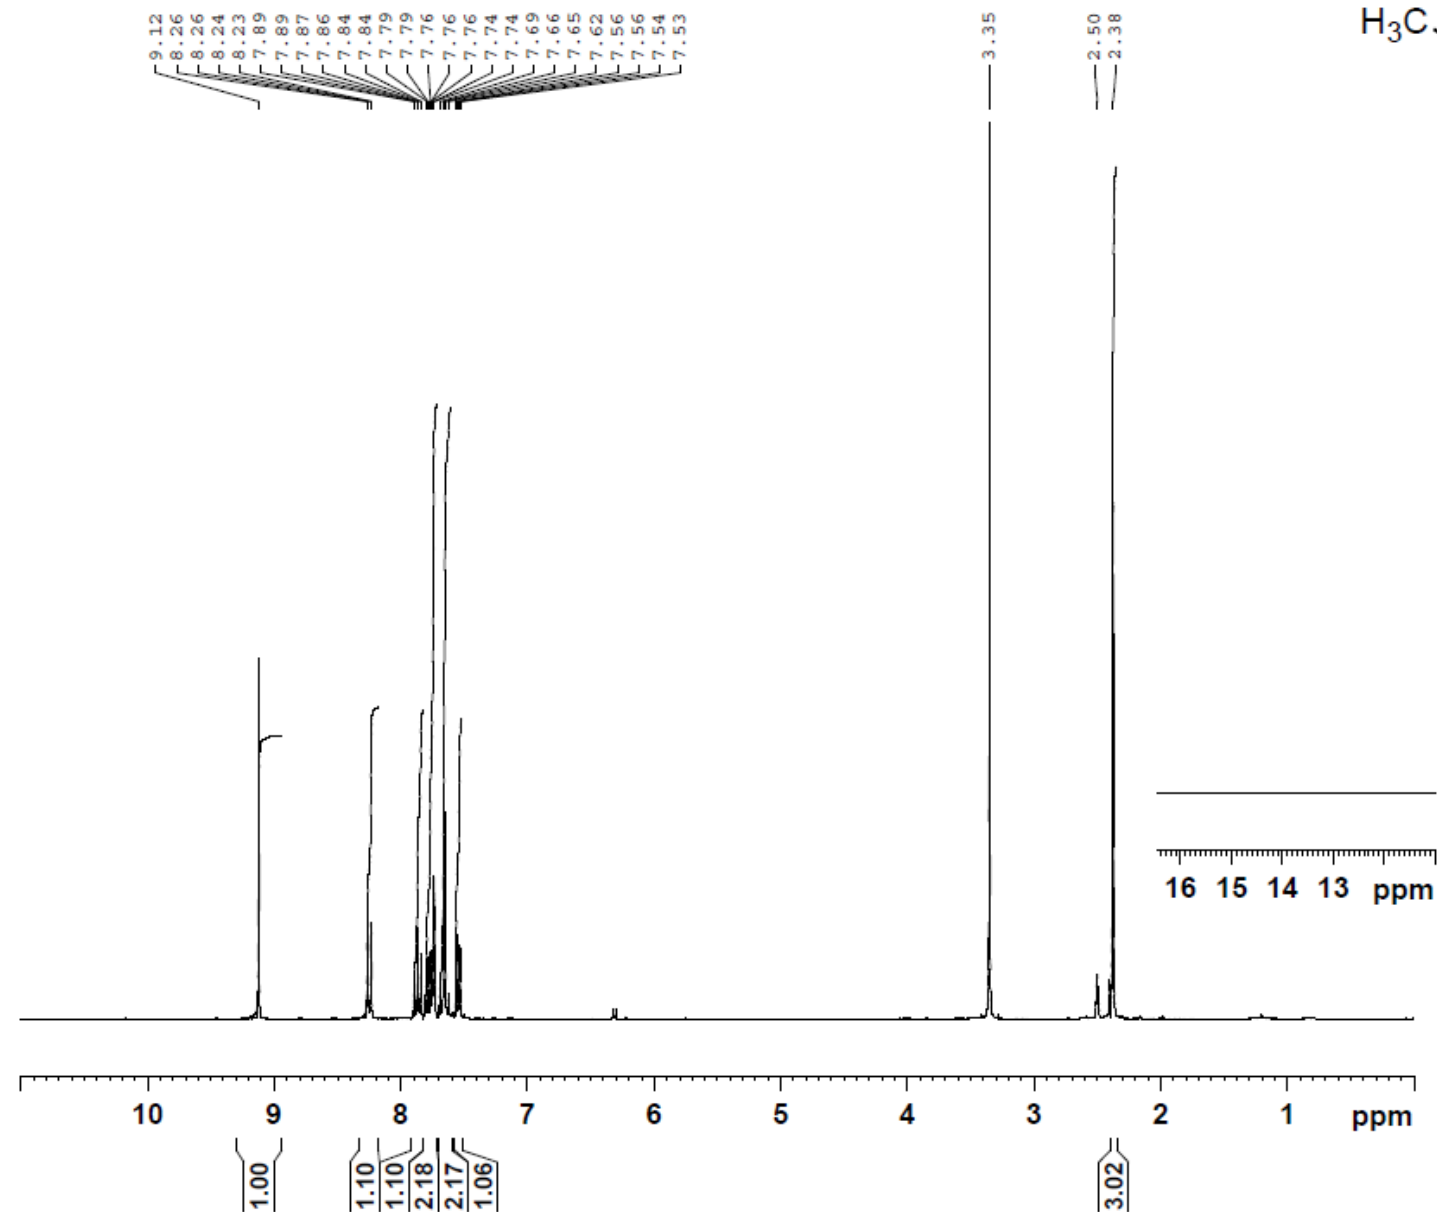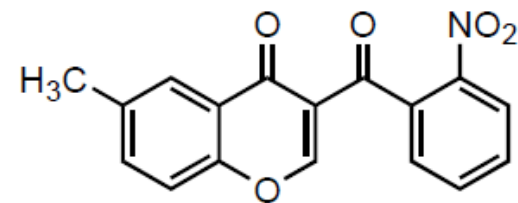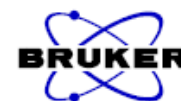

Current Data Parameters

NAME 110818.u311 IS-150  
EXPNO 10  
PROCNO 1

F2 - Acquisition Parameters

Date\_ 20110818  
Time 10.21  
INSTRUM spect  
PROBHD 5 mm PABBO BB-  
PULPROG zg30  
TD 65536  
SOLVENT DMSO  
NS 16  
DS 2  
SWH 6188.119 Hz  
FIDRES 0.094423 Hz  
AQ 5.2953587 sec  
RG 101  
DW 80.800 usec  
DE 10.00 usec  
TE 298.2 K  
D1 1.00000000 sec  
TD0 1

===== CHANNEL f1 =====

NUC1 1H  
P1 10.00 usec  
PL1 0.00 dB  
PL1W 11.25325108 W  
SFO1 300.1318534 MHz

F2 - Processing parameters

SI 32768  
SF 300.1300076 MHz  
WDW EM  
SSB 0  
LB 0.30 Hz  
GB 0  
PC 1.00



Savych, IS-150, DMSO, 13C

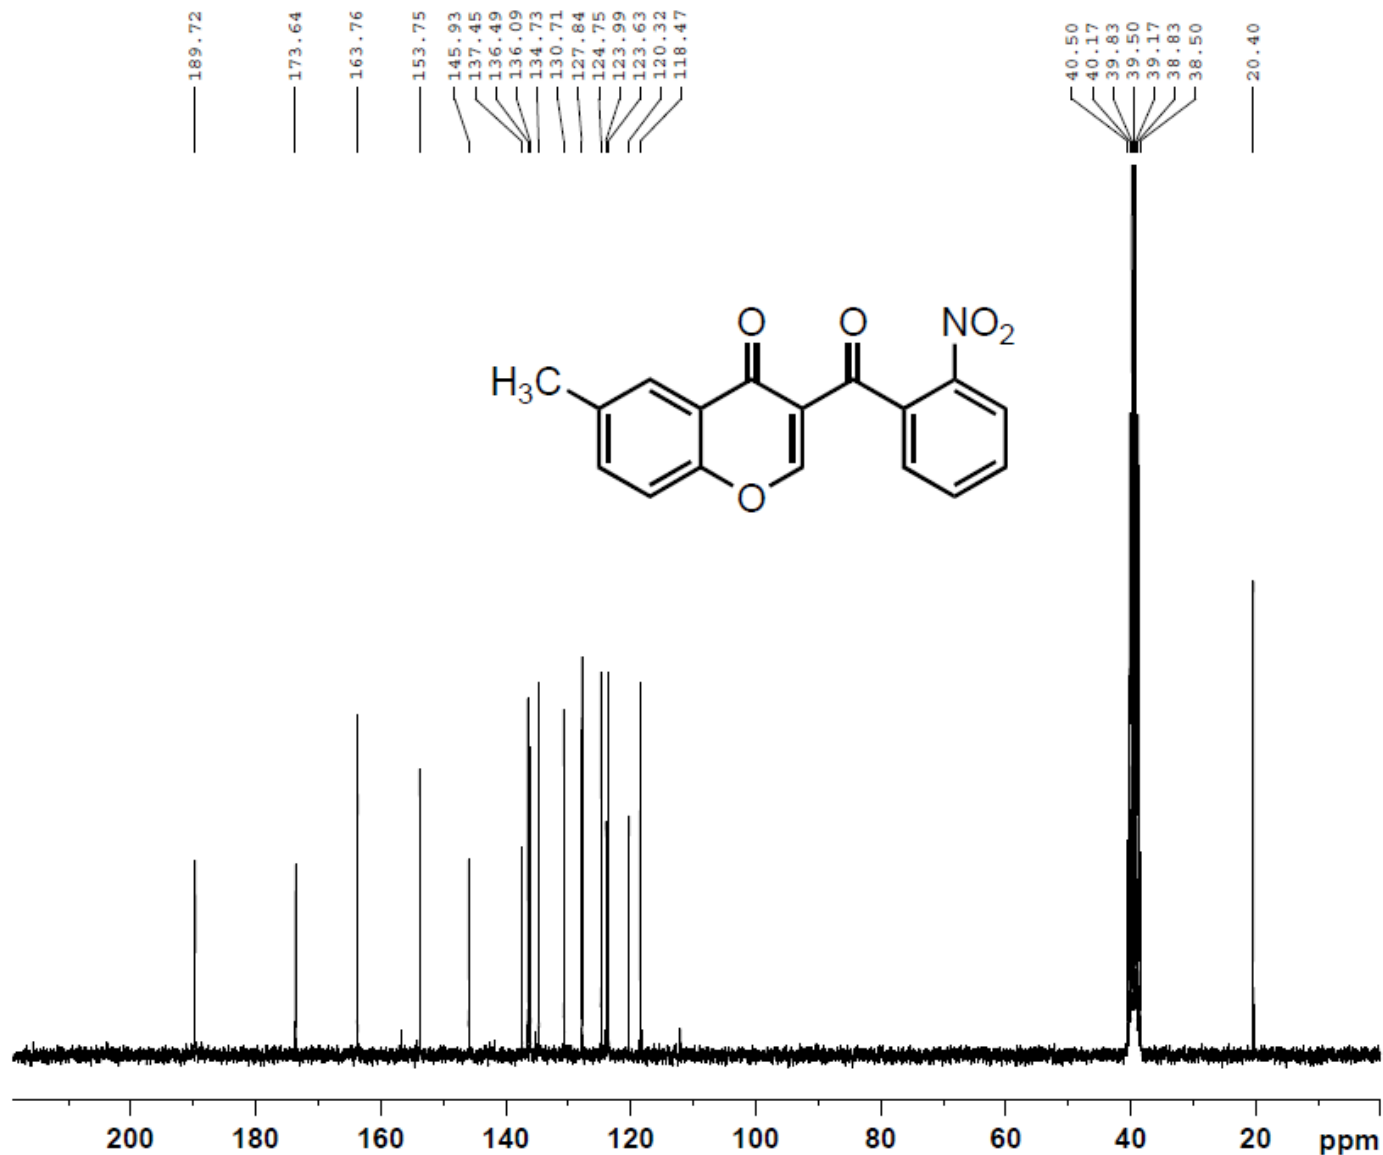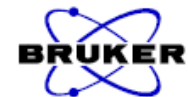

Current Data Parameters  
NAME 110818.207 IS-150  
EXPNO 10  
PROCNO 1

F2 - Acquisition Parameters  
Date\_ 20110819  
Time 2.39  
INSTRUM spect  
PROBHD 5 mm PABBO BB-  
PULPROG zgpg30  
TD 65536  
SOLVENT DMSO  
NS 1024  
DS 4  
SWH 15000.000 Hz  
FIDRES 0.228882 Hz  
AQ 2.1845834 sec  
RG 2050  
DW 33.333 usec  
DE 10.00 usec  
TE 297.9 K  
D1 2.00000000 sec  
d11 0.03000000 sec  
DELTA 1.89999998 sec  
TD0 1

===== CHANNEL f1 =====  
NUC1 13C  
P1 10.00 usec  
PL1 -1.00 dB  
SFO1 62.9015280 MHz

===== CHANNEL f2 =====  
CPDPRG2 waltz16  
NUC2 1H  
PCPD2 70.00 usec  
PL12 15.00 dB  
PL13 15.00 dB  
PL2 -2.50 dB  
SFO2 250.1310005 MHz

F2 - Processing parameters  
SI 32768  
SF 62.8952683 MHz  
WDW EM  
SSB 0  
LB 1.00 Hz  
GB 0  
PC 1.40

Savych IS-152 1H DMSO

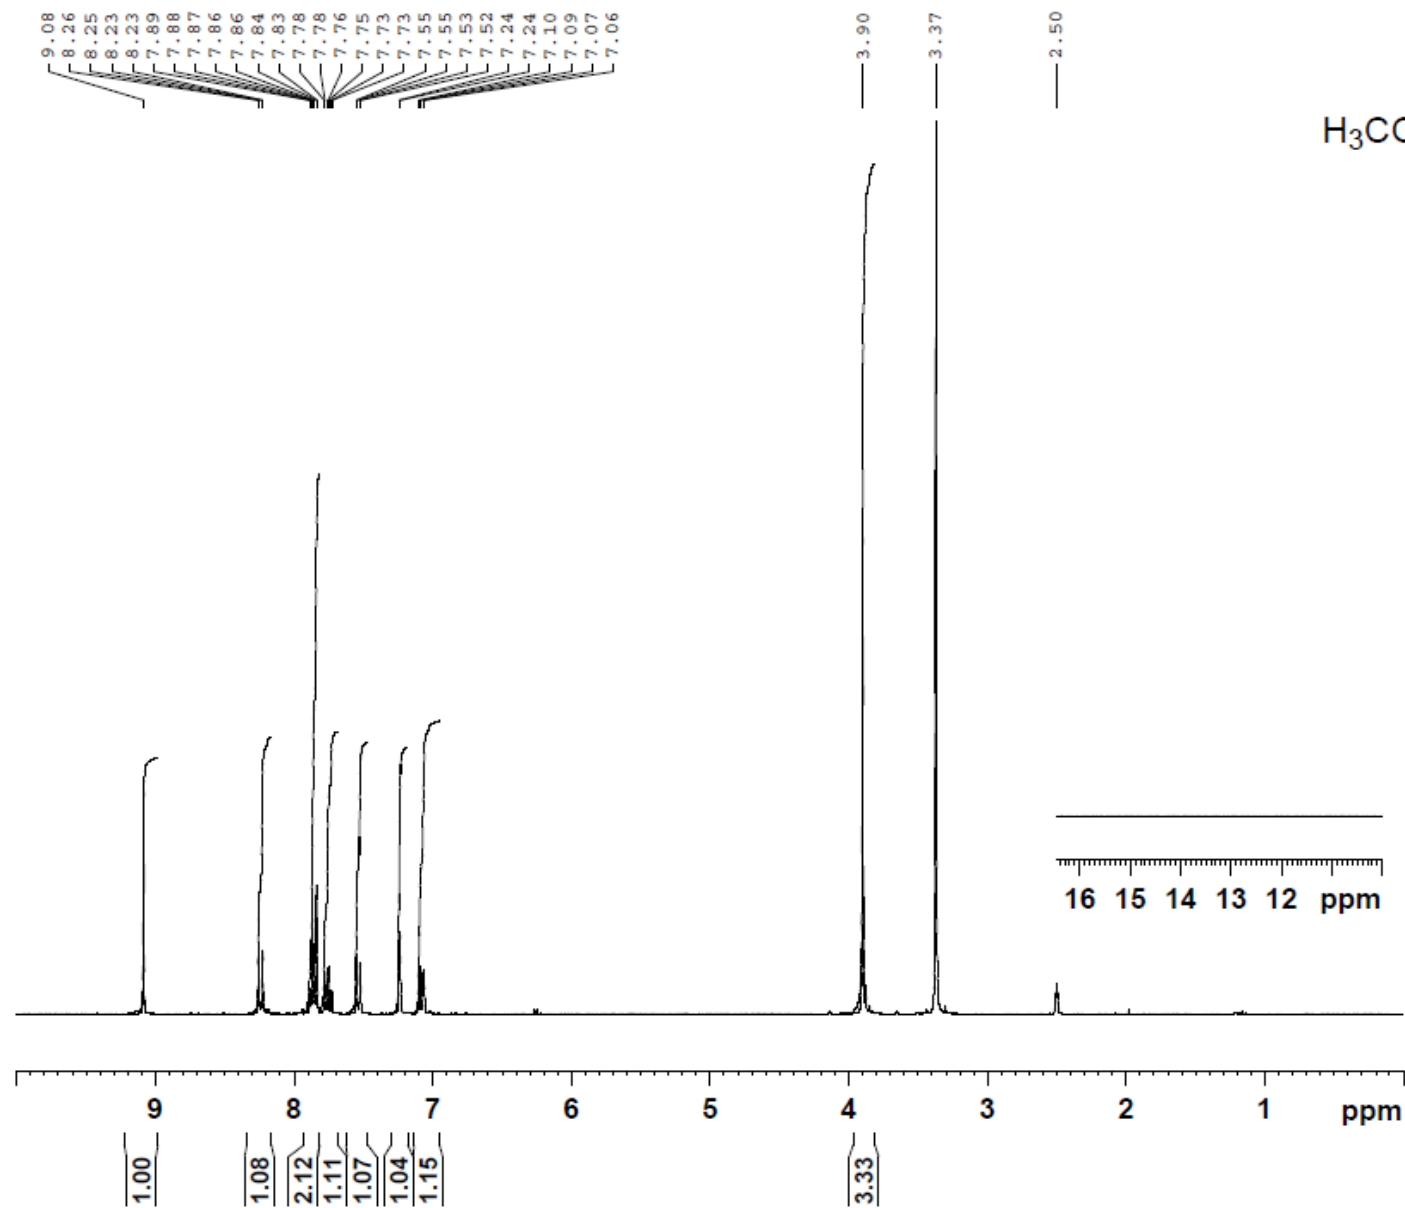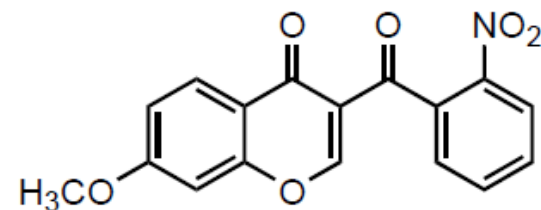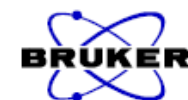

Current Data Parameters  
 NAME 110902.u311 IS-152  
 EXPNO 10  
 PROCNO 1

F2 - Acquisition Parameters  
 Date\_ 20110902  
 Time 10.32  
 INSTRUM spect  
 PROBHD 5 mm PABBO BB-  
 PULPROG zg30  
 TD 65536  
 SOLVENT DMSO  
 NS 16  
 DS 2  
 SWH 6188.119 Hz  
 FIDRES 0.094423 Hz  
 AQ 5.2953587 sec  
 RG 101  
 DW 80.800 usec  
 DE 10.00 usec  
 TE 298.2 K  
 D1 1.00000000 sec  
 TD0 1

===== CHANNEL f1 =====  
 NUC1 1H  
 P1 10.00 usec  
 PL1 0.00 dB  
 PL1W 11.25325108 W  
 SFO1 300.1318534 MHz

F2 - Processing parameters  
 SI 32768  
 SF 300.1300078 MHz  
 WDW EM  
 SSB 0  
 LB 0.30 Hz  
 GB 0  
 PC 1.00

Savych IS-152 13C DMSO

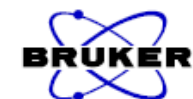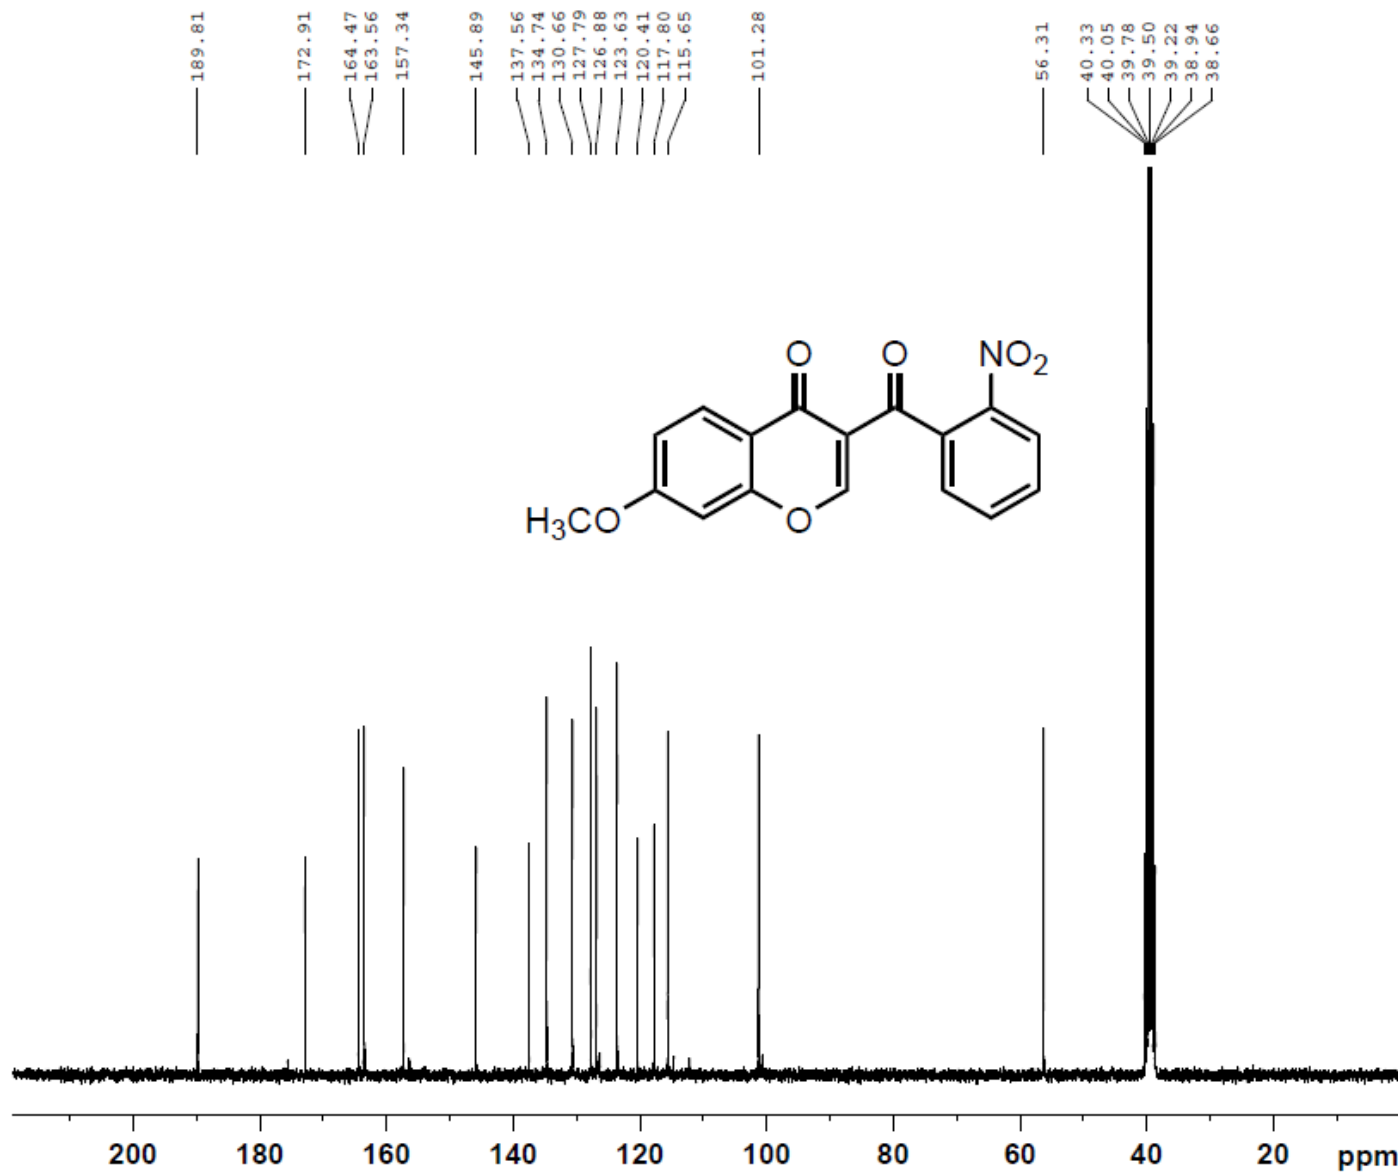

Current Data Parameters  
NAME 110902.u311 IS-152  
EXPNO 11  
PROCNO 1

F2 - Acquisition Parameters  
Date\_ 20110904  
Time 0.40  
INSTRUM spect  
PROBHD 5 mm PABBO BB-  
PULPROG zgpg30  
TD 65536  
SOLVENT DMSO  
NS 1024  
DS 4  
SWH 18028.846 Hz  
FIDRES 0.275098 Hz  
AQ 1.8175818 sec  
RG 2050  
DW 27.733 usec  
DE 10.00 usec  
TE 298.2 K  
D1 2.00000000 sec  
D11 0.03000000 sec  
TD0 1

===== CHANNEL f1 =====  
NUC1 13C  
P1 10.00 usec  
PL1 -0.50 dB  
PL1W 33.25691986 W  
SFO1 75.4752953 MHz

===== CHANNEL f2 =====  
CPDPRG2 waltz16  
NUC2 1H  
PCPD2 72.00 usec  
PL2 0.00 dB  
PL12 17.00 dB  
PL13 17.00 dB  
PL2W 11.25325108 W  
PL12W 0.22453187 W  
PL13W 0.22453187 W  
SFO2 300.1312005 MHz

F2 - Processing parameters  
SI 32768  
SF 75.4677854 MHz  
WDW EM  
SSB 0  
LB 1.00 Hz  
GB 0  
PC 1.40

Savych IS192 1H DMSO

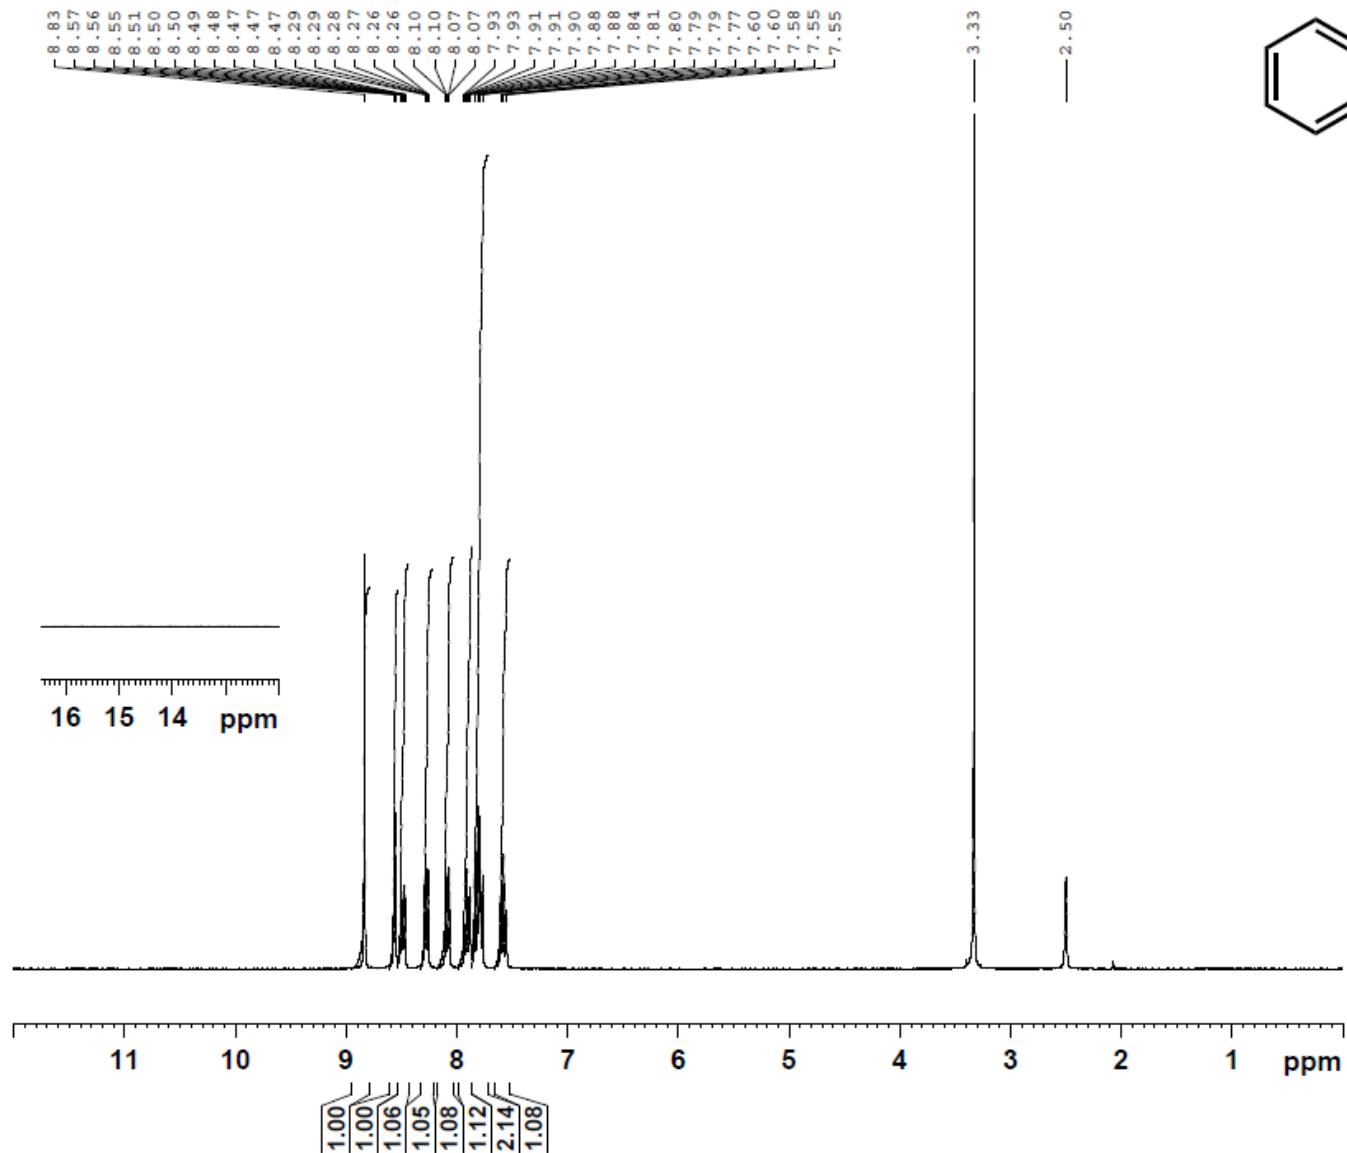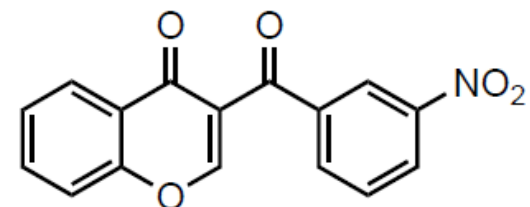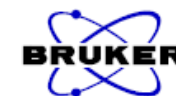

Current Data Parameters  
 NAME 120120.u338 IS-192  
 EXPNO 10  
 PROCNO 1

F2 - Acquisition Parameters  
 Date\_ 20120120  
 Time 14.46  
 INSTRUM spect  
 PROBHD 5 mm PABBO BB-  
 PULPROG zg30  
 TD 65536  
 SOLVENT DMSO  
 NS 16  
 DS 2  
 SWH 6188.119 Hz  
 FIDRES 0.094423 Hz  
 AQ 5.2953587 sec  
 RG 203  
 DW 80.800 usec  
 DE 10.00 usec  
 TE 298.2 K  
 D1 1.00000000 sec  
 TD0 1

===== CHANNEL f1 =====  
 NUC1 1H  
 P1 10.00 usec  
 PL1 0.00 dB  
 PL1W 11.25325108 W  
 SFO1 300.1318534 MHz

F2 - Processing parameters  
 SI 32768  
 SF 300.1300067 MHz  
 WDW EM  
 SSB 0  
 LB 0.30 Hz  
 GB 0  
 PC 1.00

Savych IS192 13C DMSO

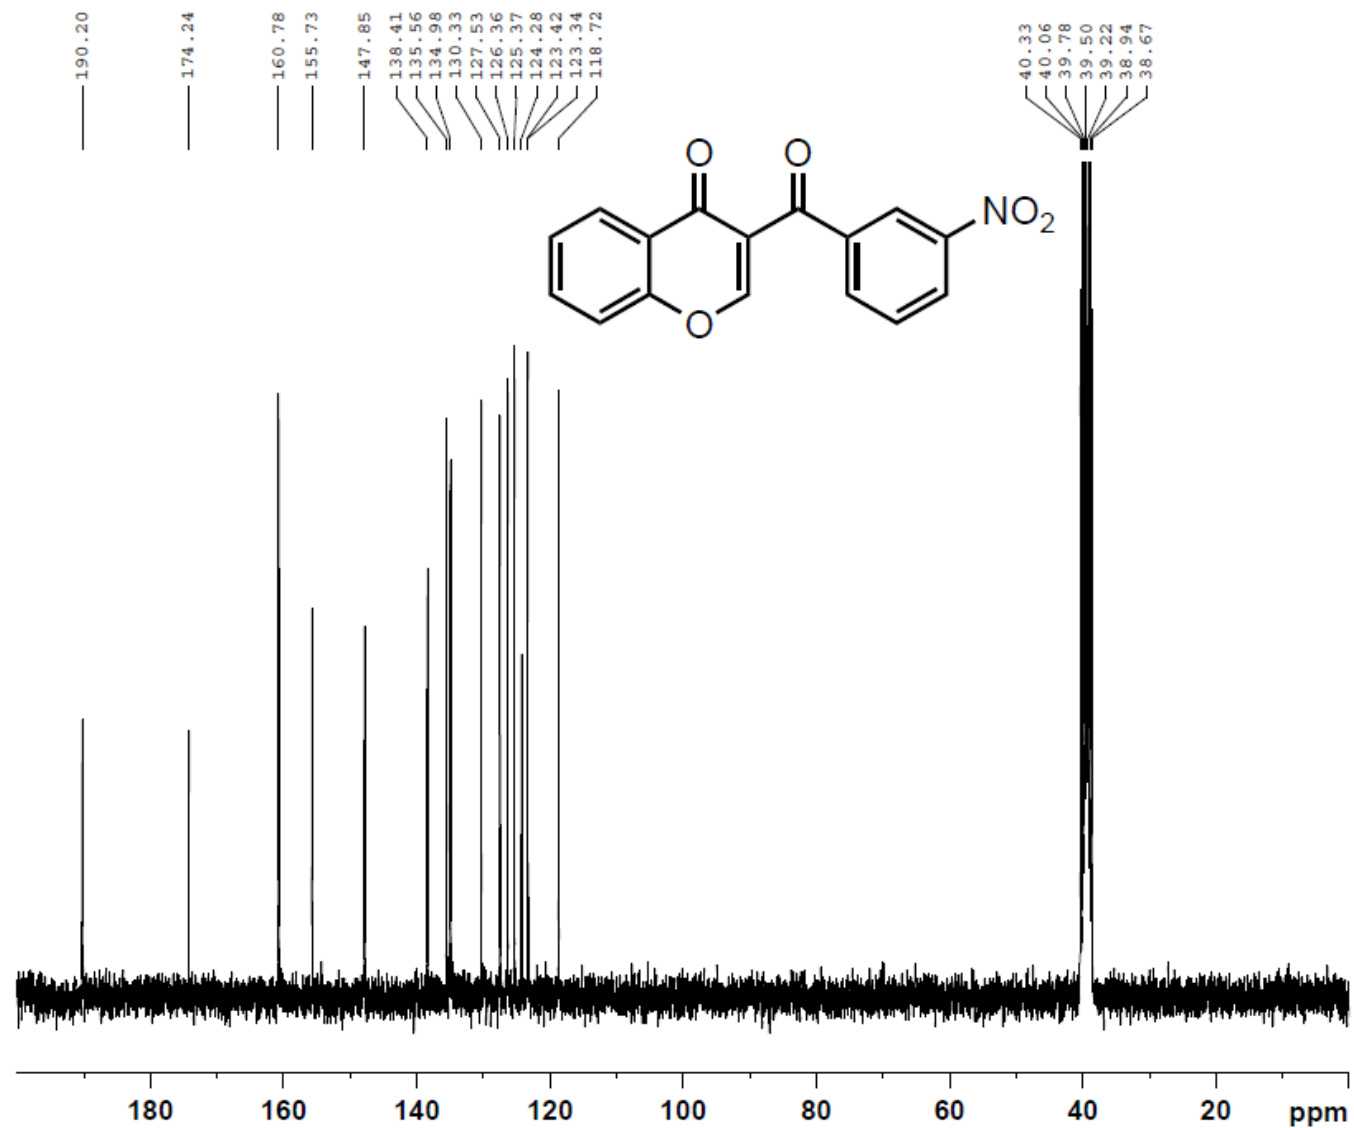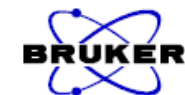

Current Data Parameters  
NAME 120120.u338 IS-192  
EXPNO 11  
PROCNO 1

F2 - Acquisition Parameters  
Date\_ 20120120  
Time 15.54  
INSTRUM spect  
PROBHD 5 mm PABBO BB-  
PULPROG zgpg30  
TD 65536  
SOLVENT DMSO  
NS 1024  
DS 4  
SWH 18028.846 Hz  
FIDRES 0.275098 Hz  
AQ 1.8175818 sec  
RG 2050  
DW 27.733 usec  
DE 10.00 usec  
TE 298.2 K  
D1 2.00000000 sec  
D11 0.03000000 sec  
TD0 1

===== CHANNEL f1 =====  
NUC1 13C  
P1 10.00 usec  
PL1 -0.50 dB  
PL1W 33.25691986 W  
SFO1 75.4752953 MHz

===== CHANNEL f2 =====  
CPDPRG2 waltz16  
NUC2 1H  
PCPD2 72.00 usec  
PL2 0.00 dB  
PL12 17.00 dB  
PL13 17.00 dB  
PL2W 11.25325108 W  
PL12W 0.22453187 W  
PL13W 0.22453187 W  
SFO2 300.1312005 MHz

F2 - Processing parameters  
SI 32768  
SF 75.4677876 MHz  
WDW EM  
SSB 0  
LB 1.00 Hz  
GB 0  
PC 1.40

Savych IS-191a 1H DMSO

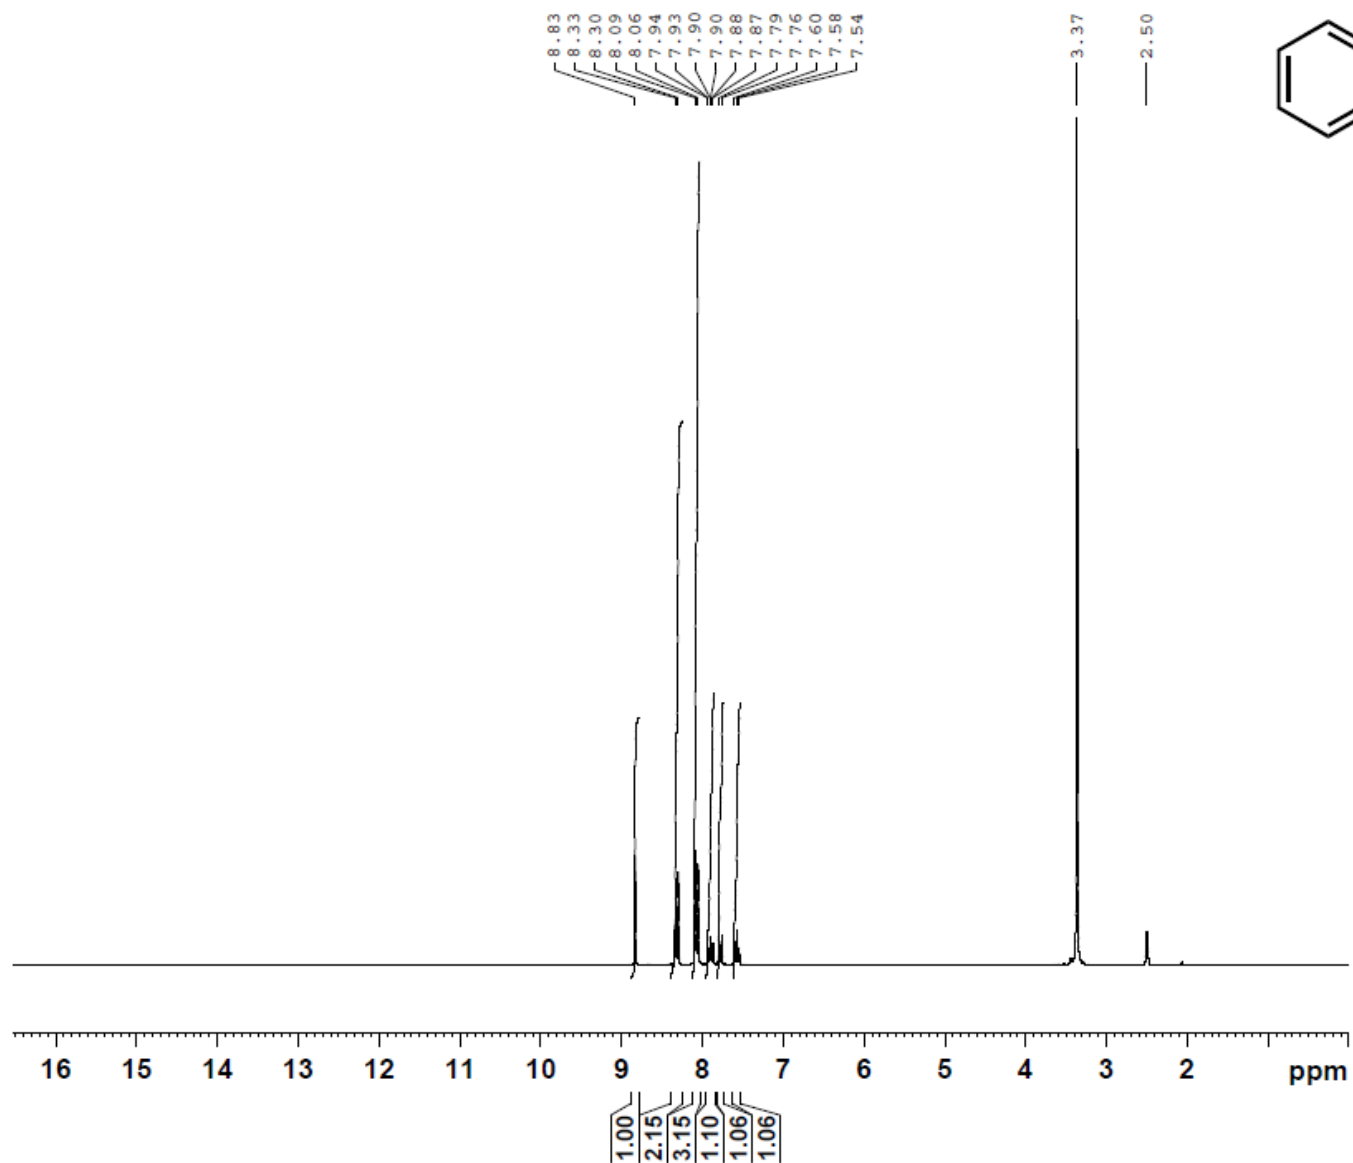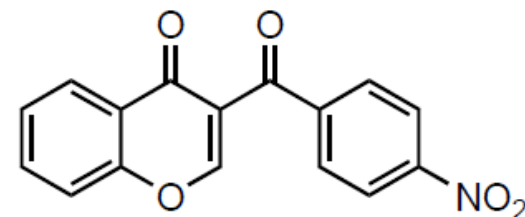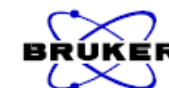

Current Data Parameters  
NAME 120120.202 IS-191.a  
EXPNO 10  
PROCNO 1

F2 - Acquisition Parameters  
Date\_ 20120120  
Time 14.37  
INSTRUM spect  
PROBHD 5 mm QNP 1H/13  
PULPROG zg30  
TD 65536  
SOLVENT DMSO  
NS 16  
DS 2  
SWH 5165.289 Hz  
FIDRES 0.078816 Hz  
AQ 6.3439350 sec  
RG 645  
DW 96.800 usec  
DE 10.00 usec  
TE 298.2 K  
D1 1.00000000 sec  
TD0 1

===== CHANNEL f1 =====  
NUC1 1H  
P1 11.40 usec  
PL1 -3.00 dB  
SFO1 250.1315447 MHz

F2 - Processing parameters  
SI 32768  
SF 250.1299951 MHz  
WDW EM  
SSB 0  
LB 0.30 Hz  
GB 0  
PC 1.00

Savych IS-191a 13C DMSO

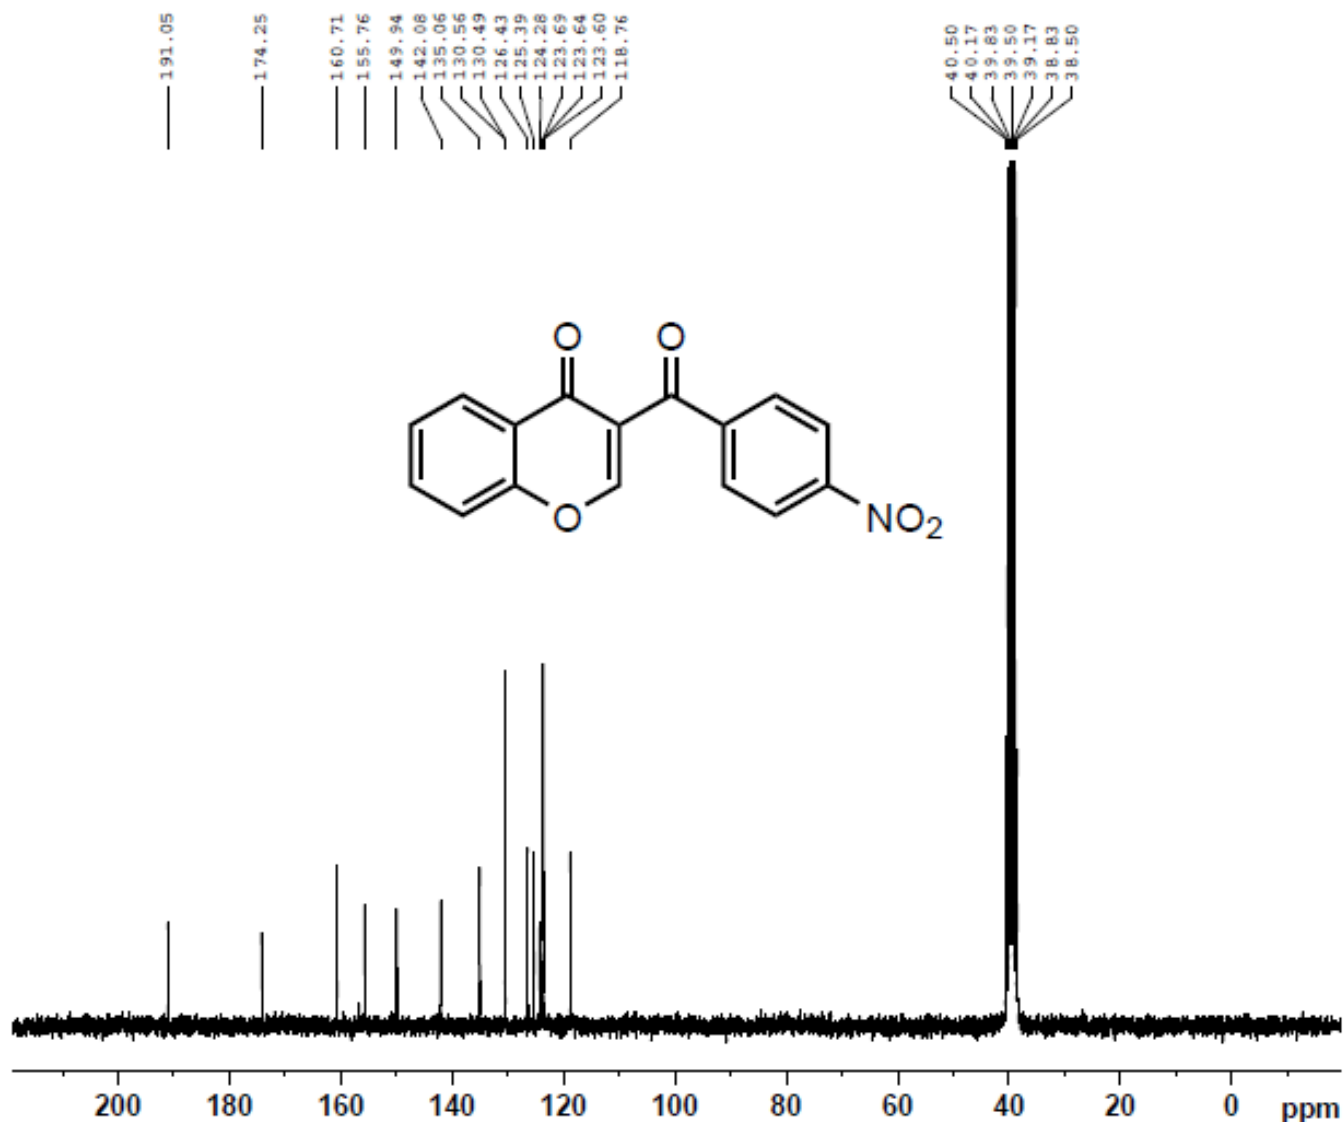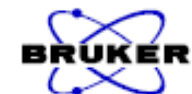

Current Data Parameters  
NAME 120120.202  
EXPNO 11  
PROCNO 1

F2 - Acquisition Parameters  
Date\_ 20120120  
Time 16.31  
INSTRUM spect  
PROBHD 5 mm QNP 1H/13  
PULPROG zgpg30  
TD 65536  
SOLVENT DMSO  
NS 1600  
DS 4  
SWH 15000.000 Hz  
FIDRES 0.228882 Hz  
AQ 2.1845834 sec  
RG 2050  
DW 33.333 usec  
DE 10.00 usec  
TE 298.2 K  
D1 2.0000000 sec  
d11 0.0300000 sec  
DELTA 1.89999998 sec  
TD0 1

==== CHANNEL f1 =====  
NUC1 13C  
P1 10.20 usec  
PL1 0.00 dB  
SFO1 62.9015280 MHz

==== CHANNEL f2 =====  
CPDPRG2 waltz16  
NUC2 1H  
PCPD2 70.00 usec  
PL12 14.00 dB  
PL13 14.00 dB  
PL2 -3.00 dB  
SFO2 250.1310005 MHz

F2 - Processing parameters  
SI 32768  
SF 62.8952635 MHz  
WDW EM  
SSB 0  
LB 1.00 Hz  
GB 0  
PC 1.40

Savych IS-193 1H DMSO

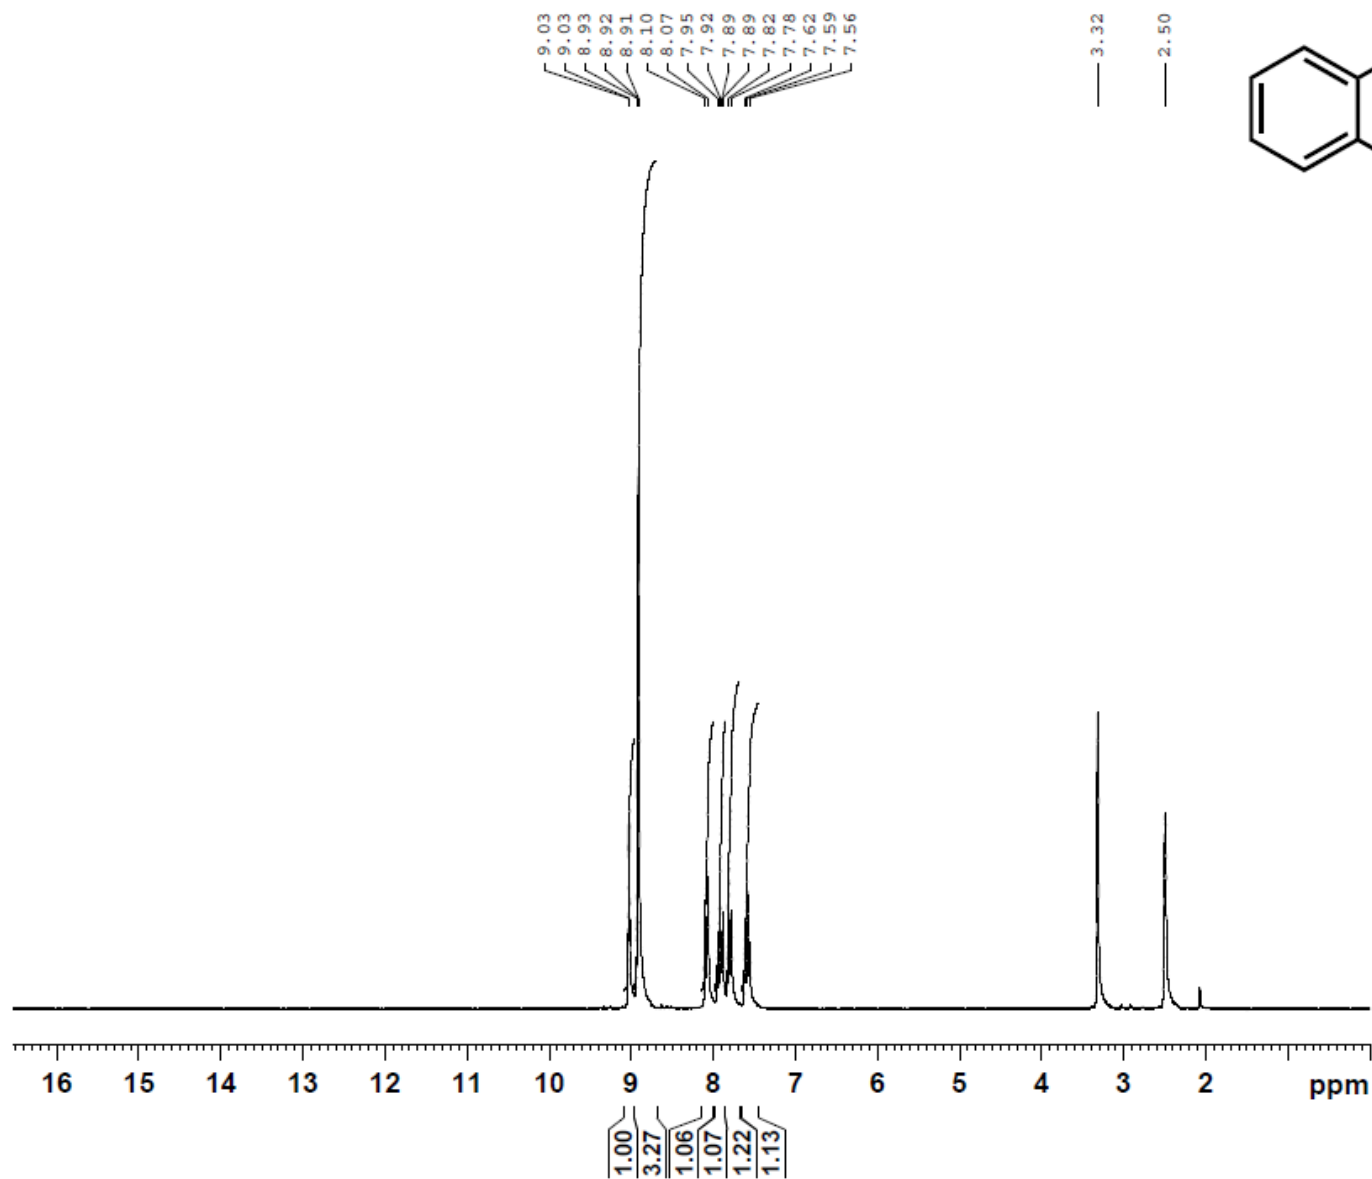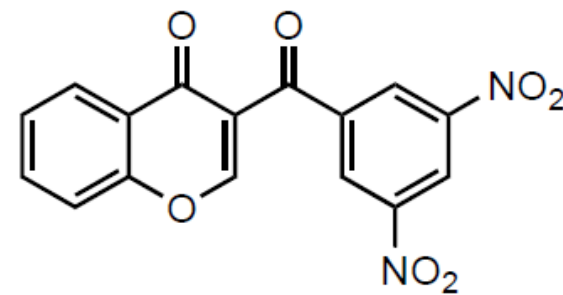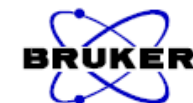

Current Data Parameters  
NAME 120217.221  
EXPNO 10  
PROCNO 1

F2 - Acquisition Parameters  
Date\_ 20120217  
Time 21.45  
INSTRUM spect  
PROBHD 5 mm QNP 1H/13  
PULPROG zg30  
TD 65536  
SOLVENT DMSO  
NS 16  
DS 2  
SWH 5165.289 Hz  
FIDRES 0.078816 Hz  
AQ 6.3439350 sec  
RG 1030  
DW 96.800 usec  
DE 10.00 usec  
TE 298.2 K  
D1 1.00000000 sec  
TD0 1

===== CHANNEL f1 =====  
NUC1 1H  
P1 11.40 usec  
PL1 -3.00 dB  
SFO1 250.1315447 MHz

F2 - Processing parameters  
SI 32768  
SF 250.1299957 MHz  
WDW EM  
SSB 0  
LB 0.30 Hz  
GB 0  
PC 1.00



Savych IS-193 13C DMSO

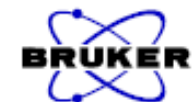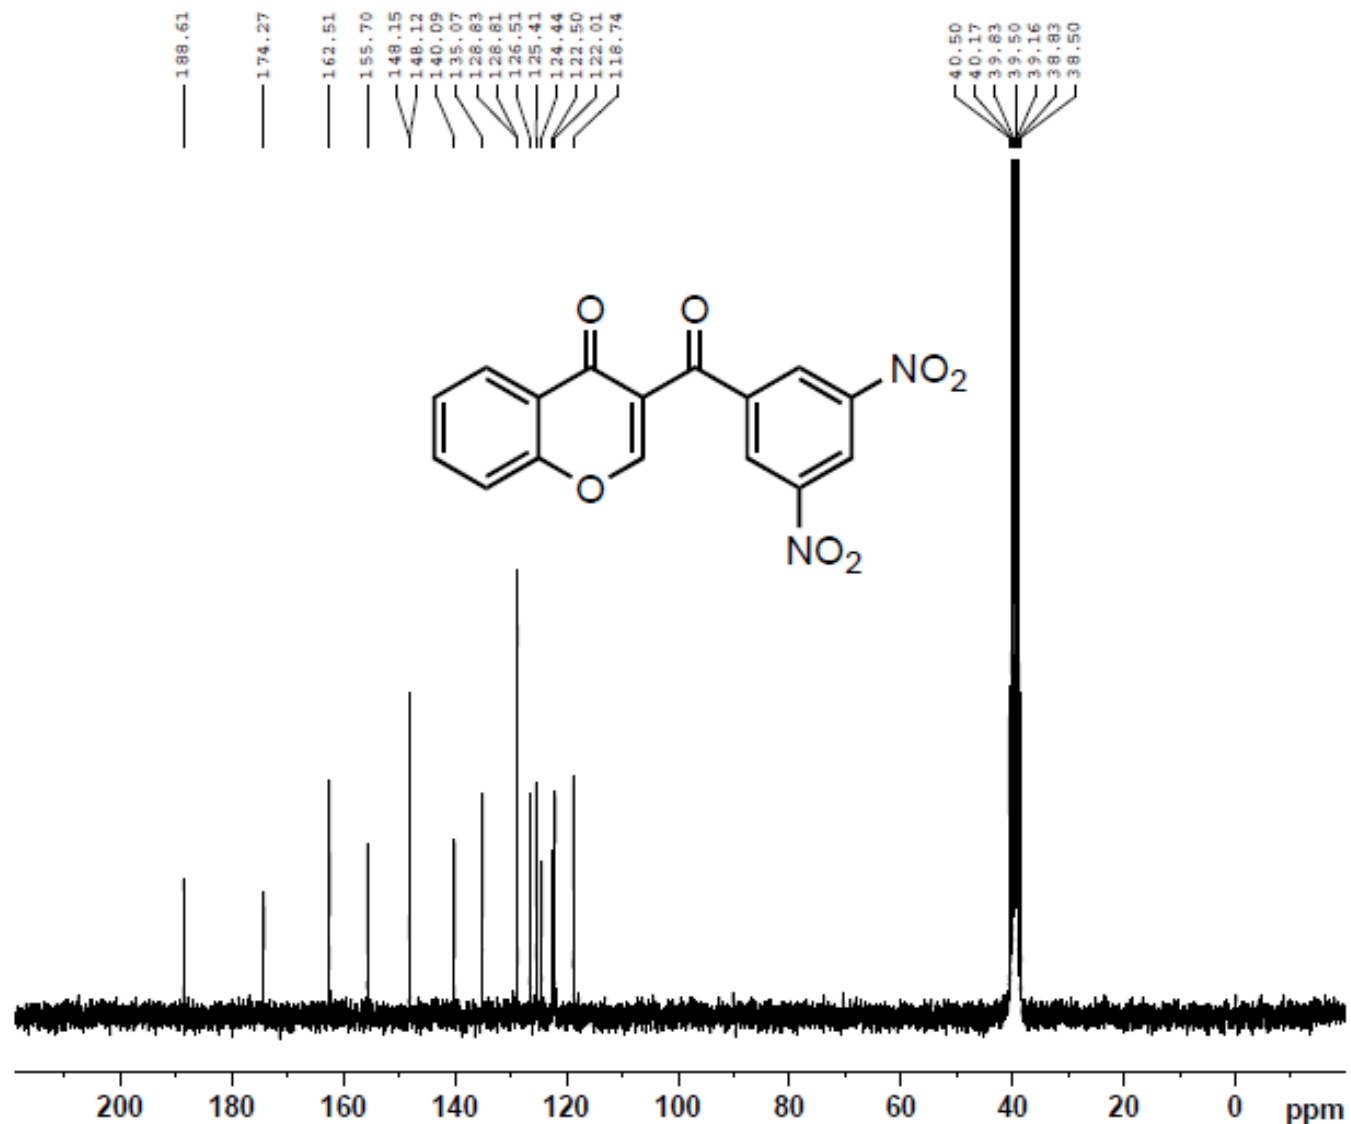

Current Data Parameters  
NAME 120217.221  
EXPNO 11  
PROCNO 1

F2 - Acquisition Parameters  
Date\_ 20120217  
Time 22.58  
INSTRUM spect  
PROBHD 5 mm QNP 1H/13  
PULPROG zgpg30  
TD 65536  
SOLVENT DMSO  
NS 1024  
DS 4  
SWH 15000.000 Hz  
FIDRES 0.228882 Hz  
AQ 2.1845834 sec  
RG 2050  
DW 33.333 usec  
DE 10.00 usec  
TE 298.2 K  
D1 2.00000000 sec  
d11 0.03000000 sec  
DELTA 1.89999998 sec  
TD0 1

==== CHANNEL f1 =====  
NUC1 13C  
P1 10.20 usec  
PL1 0.00 dB  
SFO1 62.9015280 MHz

==== CHANNEL f2 =====  
CPDPRG2 waltz16  
NUC2 1H  
PCPD2 70.00 usec  
PL12 14.00 dB  
PL13 14.00 dB  
PL2 -3.00 dB  
SFO2 250.1310005 MHz

F2 - Processing parameters  
SI 32768  
SF 62.8952678 MHz  
WDW EM  
SSB 0  
LB 1.00 Hz  
GB 0  
PC 1.40

Savych IS-169 1H DMSO

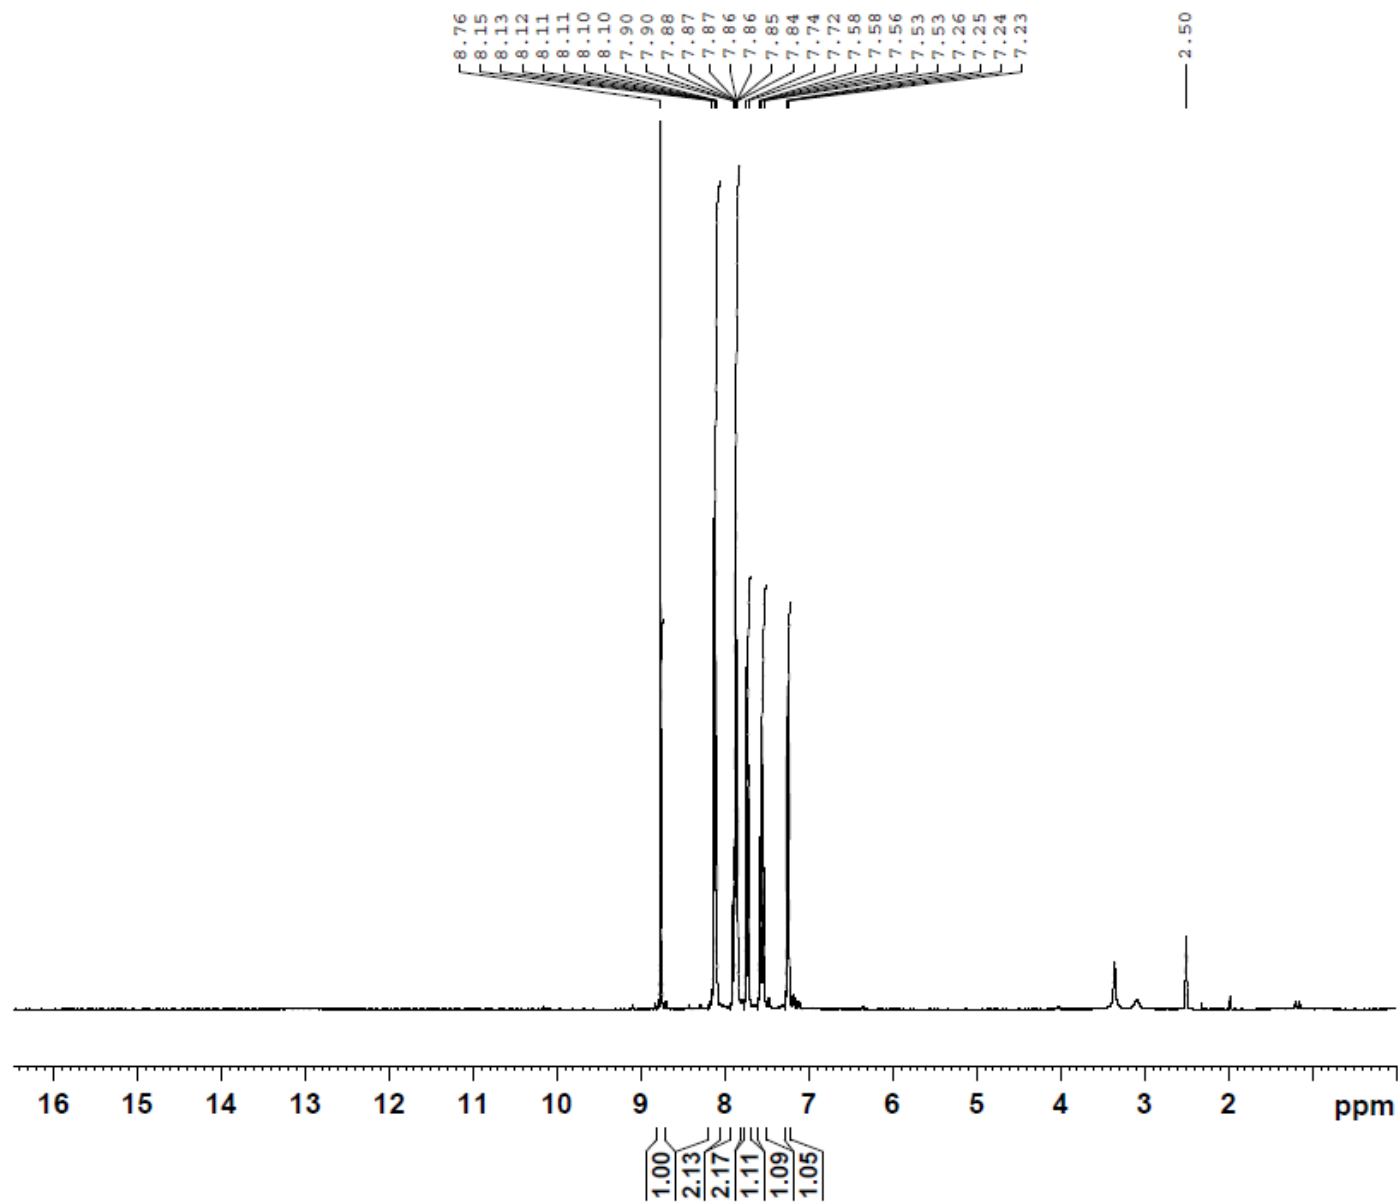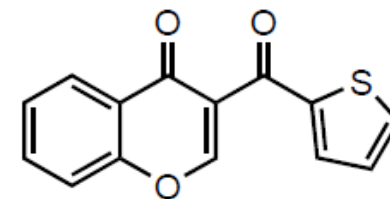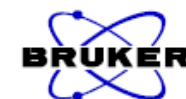

Current Data Parameters  
NAME 111012.u305 IS-169  
EXPNO 10  
PROCNO 1

F2 - Acquisition Parameters  
Date\_ 20111012  
Time 9.37  
INSTRUM spect  
PROBHD 5 mm PABBO BB-  
PULPROG zg30  
TD 65536  
SOLVENT DMSO  
NS 16  
DS 2  
SWH 6188.119 Hz  
FIDRES 0.094423 Hz  
AQ 5.2953587 sec  
RG 90.5  
DW 80.800 usec  
DE 10.00 usec  
TE 298.2 K  
D1 1.00000000 sec  
TD0 1

===== CHANNEL f1 =====  
NUC1 1H  
P1 10.00 usec  
PL1 0.00 dB  
PL1W 11.25325108 W  
SFO1 300.1318534 MHz

F2 - Processing parameters  
SI 32768  
SF 300.1300073 MHz  
WDW EM  
SSB 0  
LB 0.30 Hz  
GB 0  
PC 1.00

Savych IS-169 13C DMSO

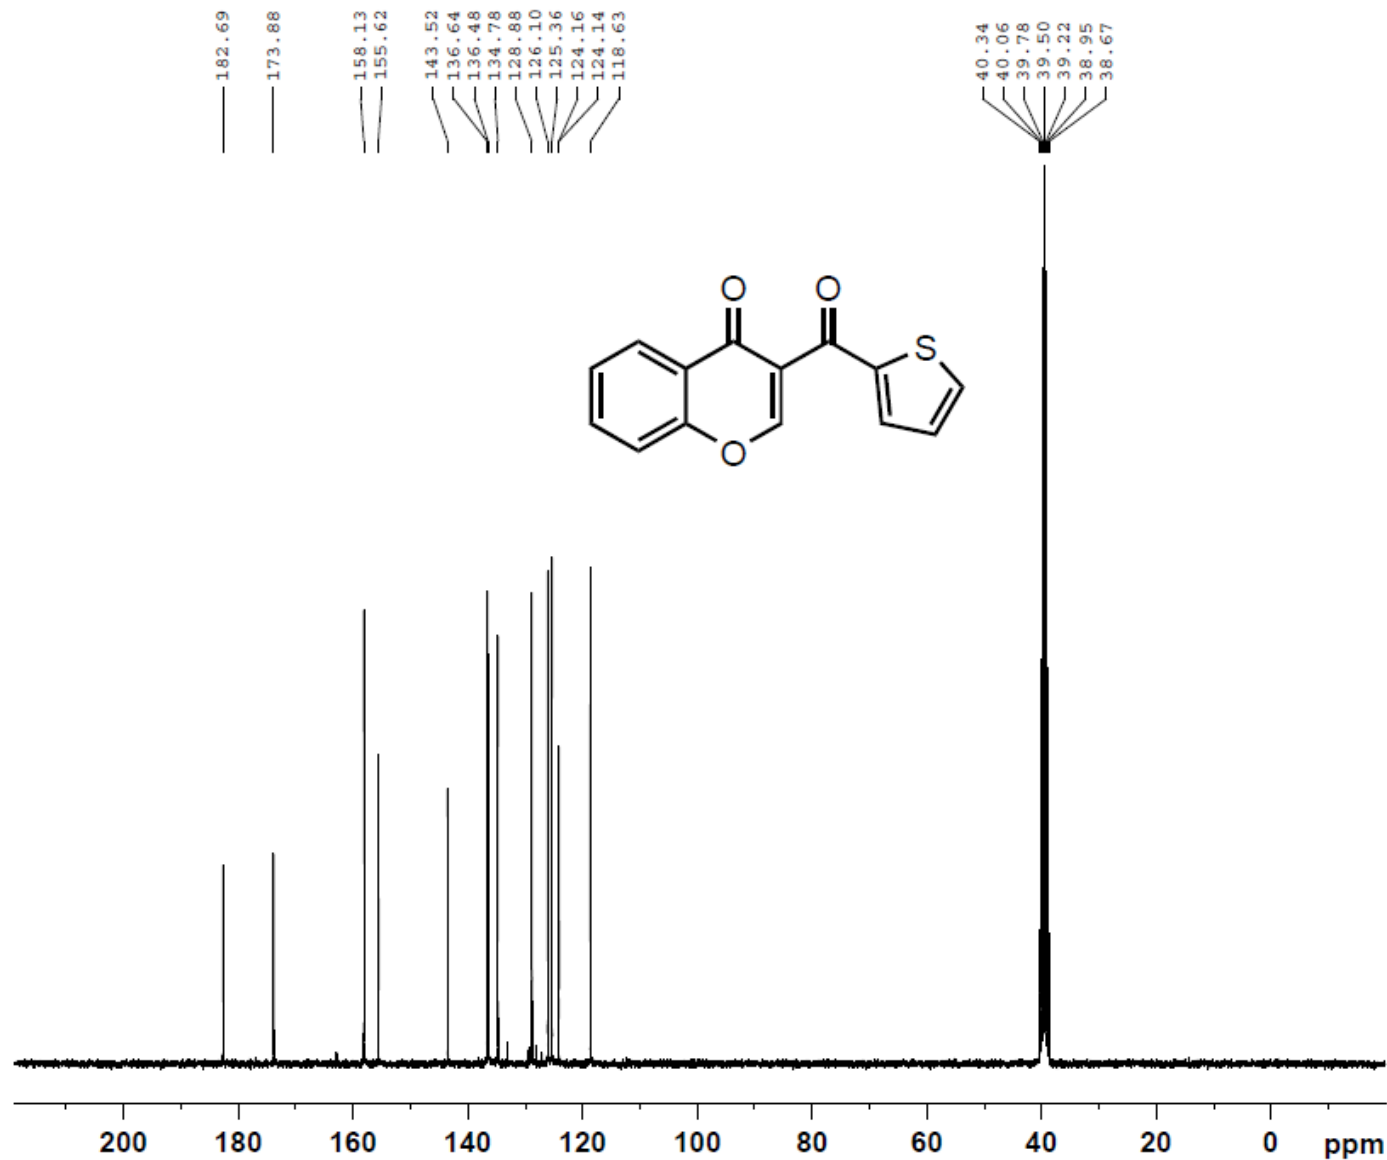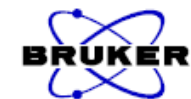

Current Data Parameters  
NAME 111012.u305 IS-169  
EXPNO 11  
PROCNO 1

F2 - Acquisition Parameters  
Date\_ 20111013  
Time 4.00  
INSTRUM spect  
PROBHD 5 mm PABBO BB-  
PULPROG zgpg30  
TD 65536  
SOLVENT DMSO  
NS 1024  
DS 4  
SWH 18028.846 Hz  
FIDRES 0.275098 Hz  
AQ 1.8175818 sec  
RG 2050  
DW 27.733 usec  
DE 10.00 usec  
TE 298.2 K  
D1 2.00000000 sec  
D11 0.03000000 sec  
TD0 1

===== CHANNEL f1 =====  
NUC1 13C  
P1 10.00 usec  
PL1 -0.50 dB  
PL1W 33.25691986 W  
SFO1 75.4752953 MHz

===== CHANNEL f2 =====  
CPDPRG2 waltz16  
NUC2 1H  
PCPD2 72.00 usec  
PL2 0.00 dB  
PL12 17.00 dB  
PL13 17.00 dB  
PL2W 11.25325108 W  
PL12W 0.22453187 W  
PL13W 0.22453187 W  
SFO2 300.1312005 MHz

F2 - Processing parameters  
SI 32768  
SF 75.4677881 MHz  
WDW EM  
SSB 0  
LB 1.00 Hz  
GB 0  
PC 1.40

Savych IS-53.3 1H CDC13

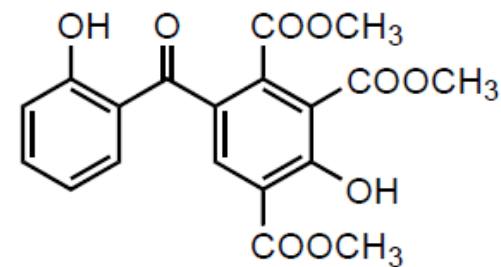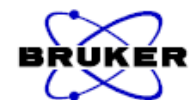

Current Data Parameters

NAME 110531.u317 IS-53.3  
 EXPNO 10  
 PROCNO 1

F2 - Acquisition Parameters

Date\_ 20110531  
 Time 12.50  
 INSTRUM spect  
 PROBHD 5 mm PABBO BB-  
 PULPROG zg30  
 TD 65536  
 SOLVENT CDC13  
 NS 16  
 DS 2  
 SWH 6188.119 Hz  
 FIDRES 0.094423 Hz  
 AQ 5.2953587 sec  
 RG 114  
 DW 80.800 usec  
 DE 10.00 usec  
 TE 298.2 K  
 D1 1.00000000 sec  
 TD0 1

===== CHANNEL f1 =====

NUC1 1H  
 P1 10.00 usec  
 PL1 0.00 dB  
 PL1W 11.25325108 W  
 SFO1 300.1318534 MHz

F2 - Processing parameters

SI 32768  
 SF 300.1300088 MHz  
 WDW EM  
 SSB 0  
 LB 0.30 Hz  
 GB 0  
 PC 1.00

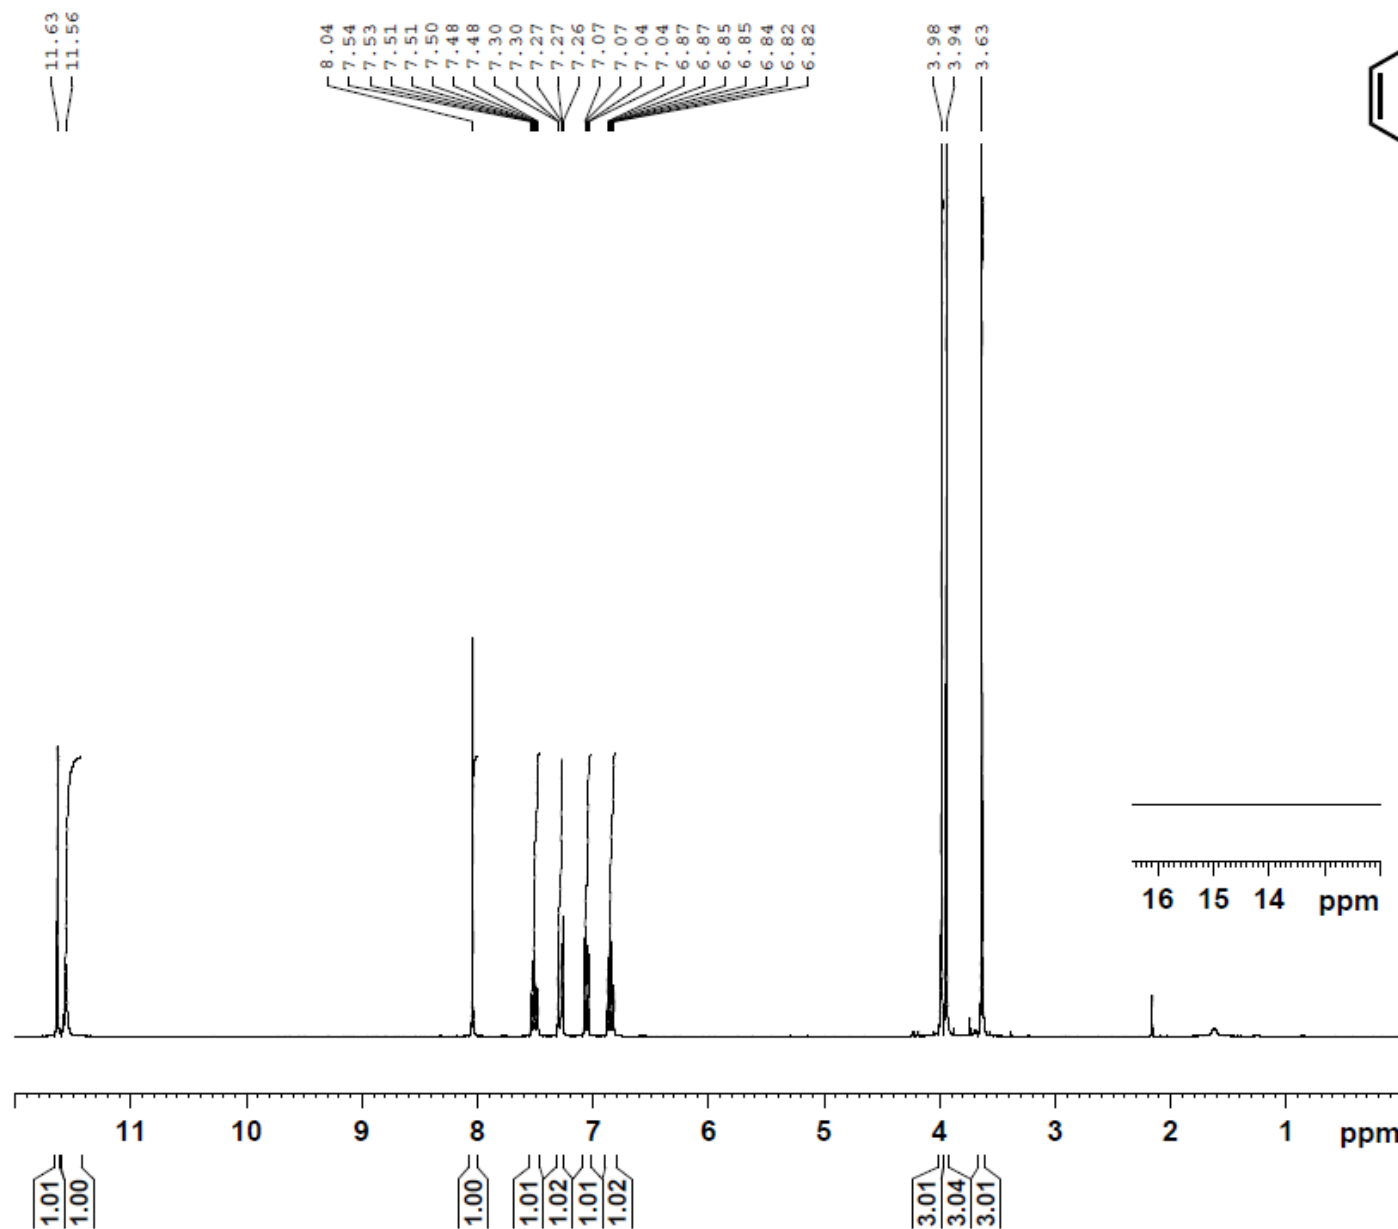

Savych IS-53.3 13C CDCl3

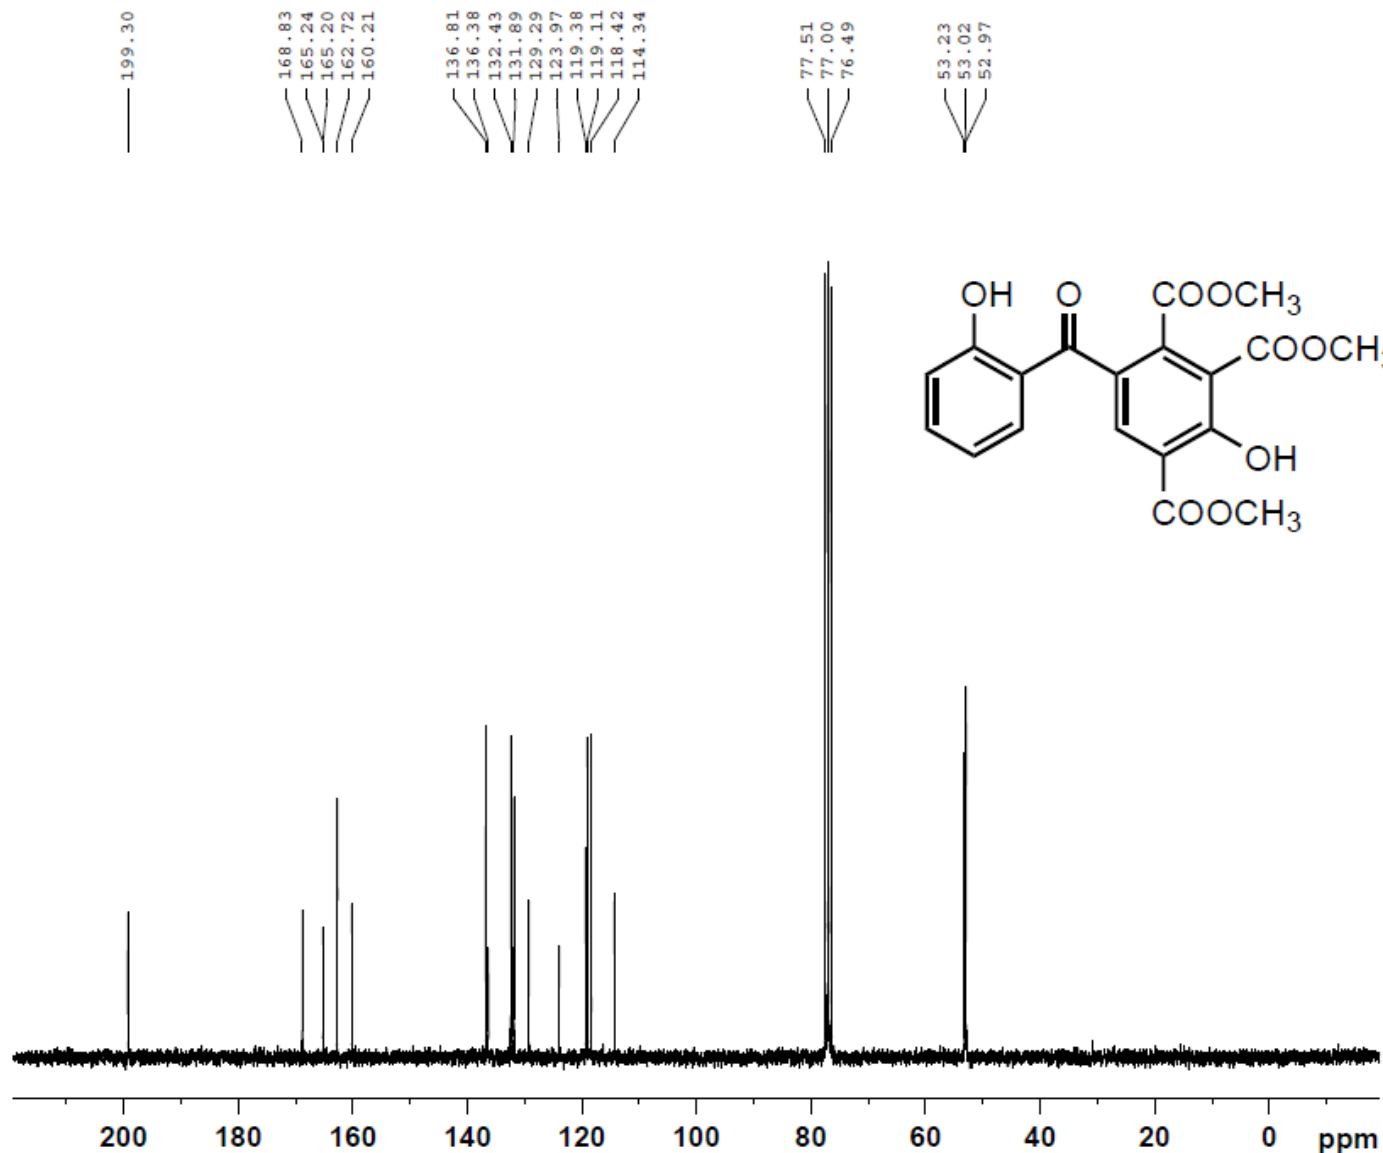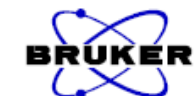

Current Data Parameters  
NAME 110601.206 IS-53.3  
EXPNO 10  
PROCNO 1

F2 - Acquisition Parameters  
Date\_ 20110601  
Time 16.37  
INSTRUM spect  
PROBHD 5 mm PABBO BB-  
PULPROG zgpg30  
TD 65536  
SOLVENT CDCl3  
NS 1024  
DS 4  
SWH 15000.000 Hz  
FIDRES 0.228882 Hz  
AQ 2.1845834 sec  
RG 2050  
DW 33.333 usec  
DE 10.00 usec  
TE 299.0 K  
D1 2.00000000 sec  
d11 0.03000000 sec  
DELTA 1.89999998 sec  
TD0 1

===== CHANNEL f1 =====  
NUC1 13C  
P1 10.00 usec  
PL1 -1.00 dB  
SFO1 62.9015280 MHz

===== CHANNEL f2 =====  
CPDPRG2 waltz16  
NUC2 1H  
PCPD2 70.00 usec  
PL12 15.00 dB  
PL13 15.00 dB  
PL2 -2.50 dB  
SFO2 250.1310005 MHz

F2 - Processing parameters  
SI 32768  
SF 62.8952402 MHz  
WDW EM  
SSB 0  
LB 1.00 Hz  
GB 0  
PC 1.40

Savych IS-52! 1H DMSO

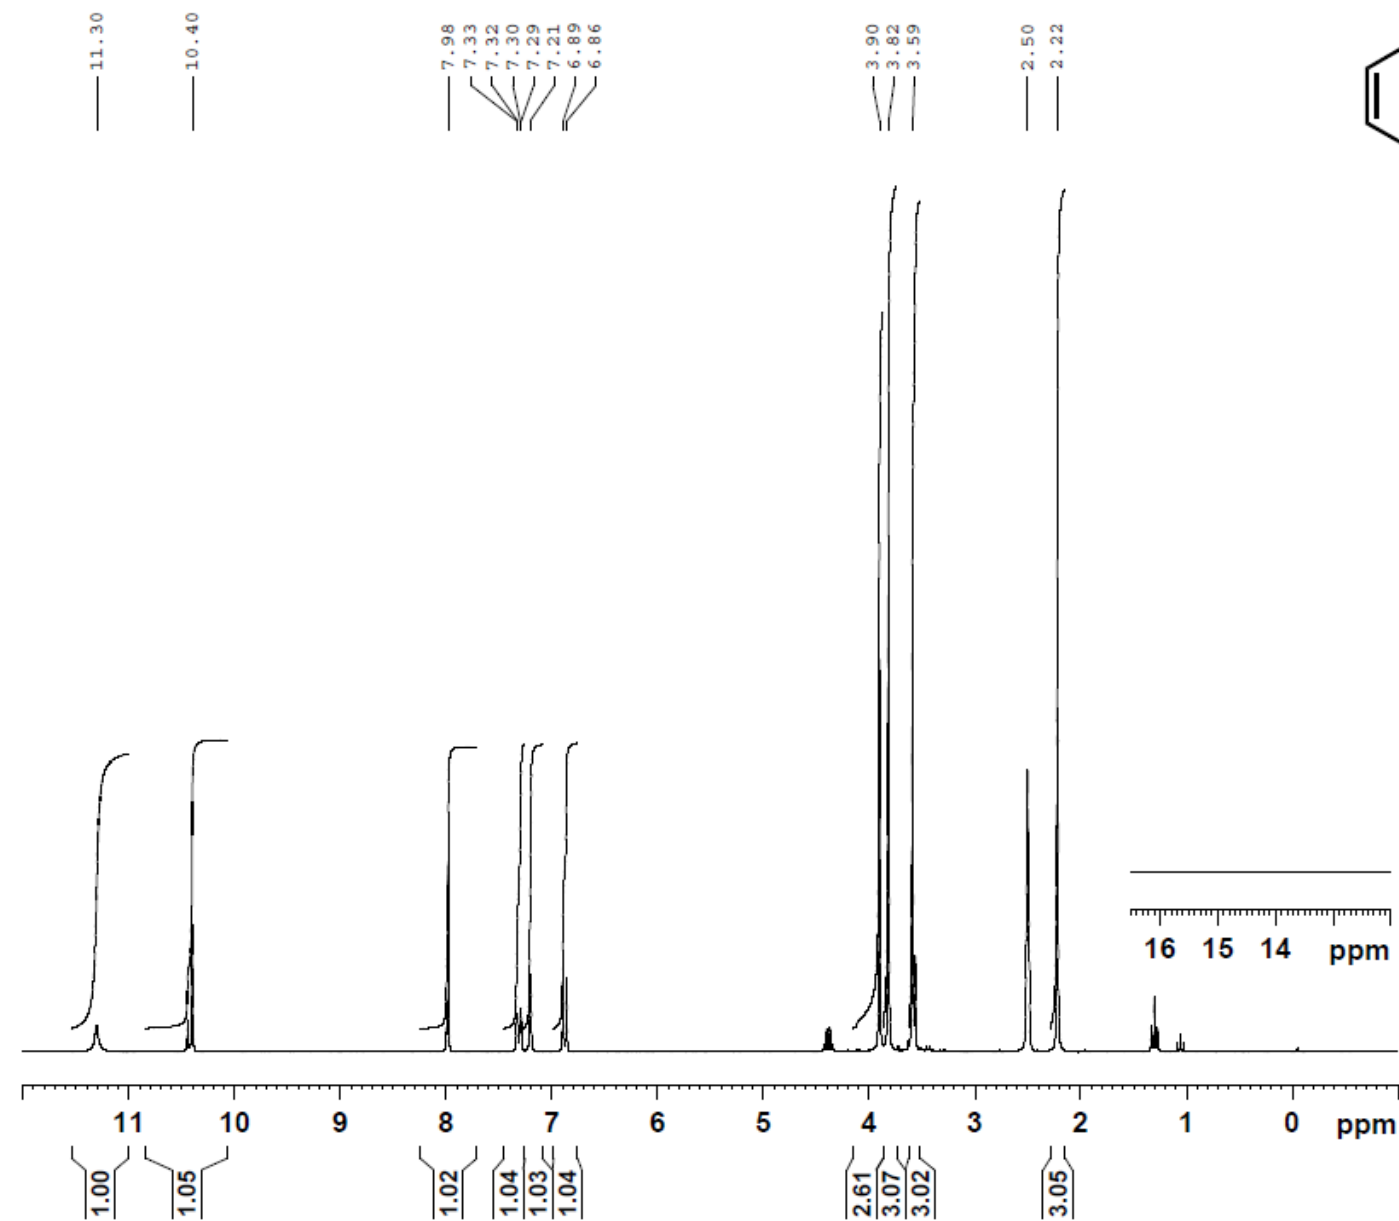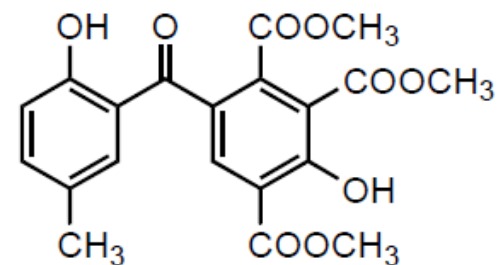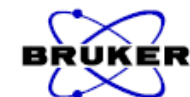

Current Data Parameters  
 NAME 110216.216 IS-52  
 EXPNO 10  
 PROCNO 1

F2 - Acquisition Parameters  
 Date\_ 20110216  
 Time 13.36  
 INSTRUM spect  
 PROBHD 5 mm PABBO BB-  
 PULPROG zg30  
 TD 65536  
 SOLVENT DMSO  
 NS 16  
 DS 2  
 SWH 5165.289 Hz  
 FIDRES 0.078816 Hz  
 AQ 6.3439350 sec  
 RG 322  
 DW 96.800 usec  
 DE 10.00 usec  
 TE 298.1 K  
 D1 1.00000000 sec  
 TD0 1

===== CHANNEL f1 =====  
 NUC1 1H  
 P1 10.00 usec  
 PL1 -2.50 dB  
 SFO1 250.1315447 MHz

F2 - Processing parameters  
 SI 32768  
 SF 250.1299986 MHz  
 WDW EM  
 SSB 0  
 LB 0.30 Hz  
 GB 0  
 PC 1.00

Savych IS-52! 13C DMSO

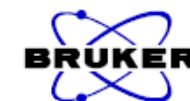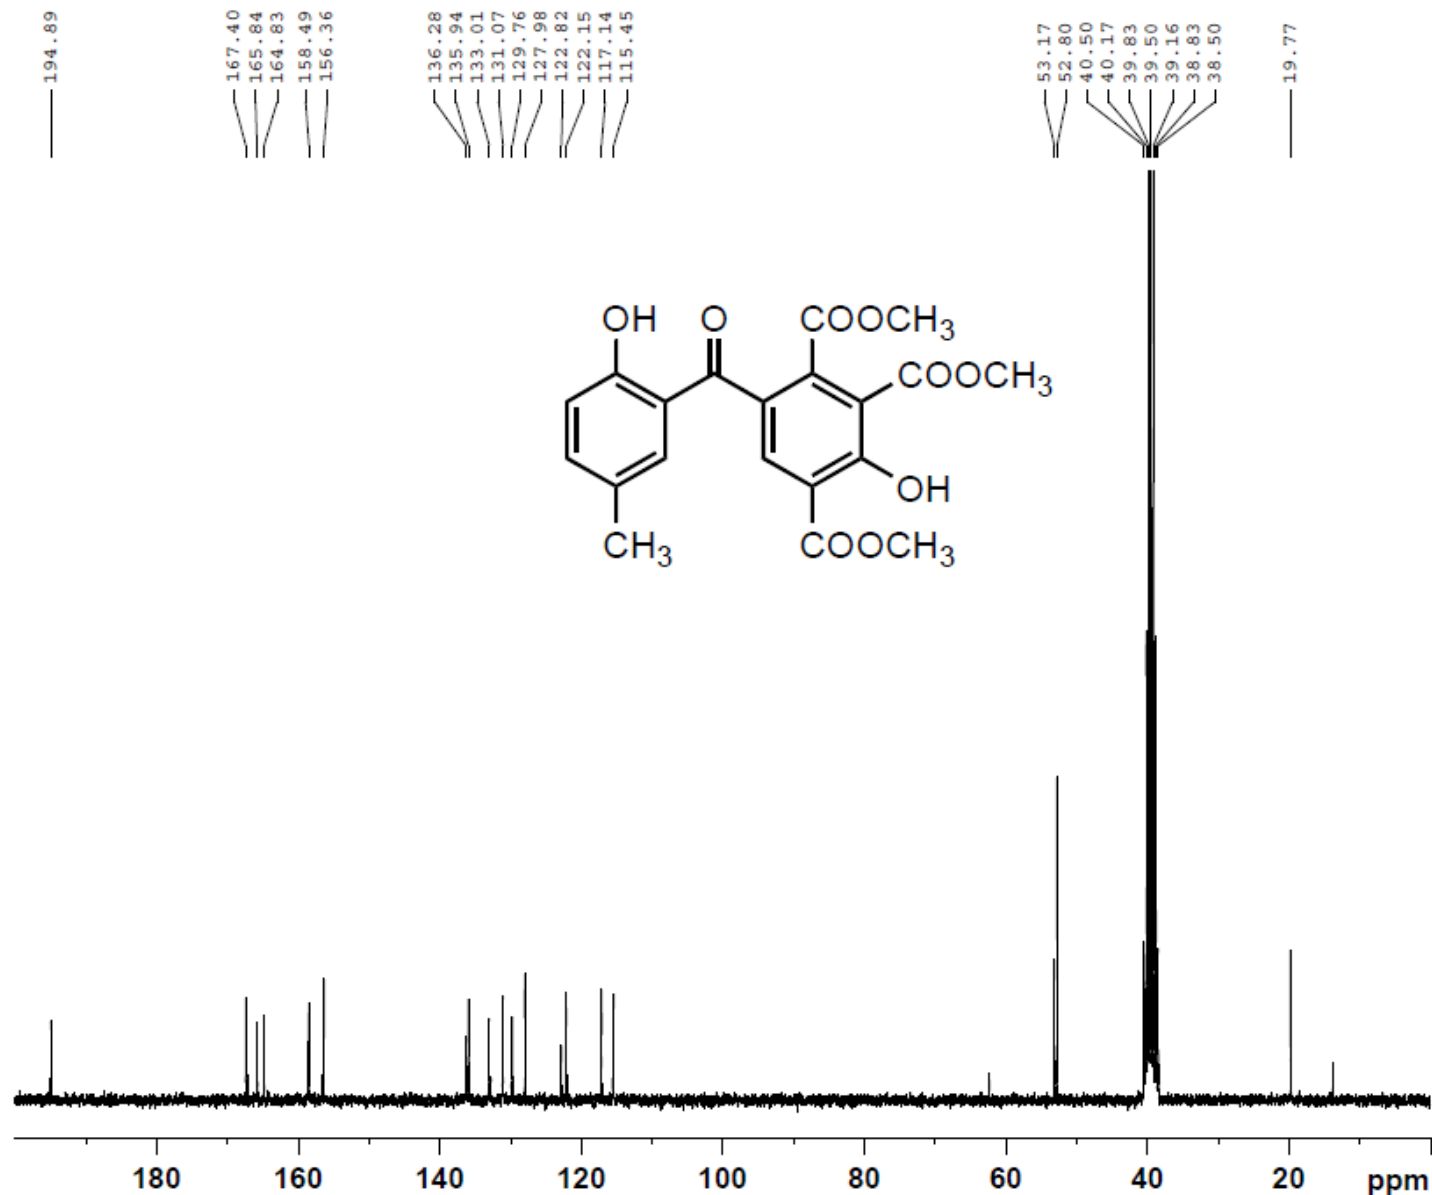

Current Data Parameters  
 NAME 110216.216 IS-52!  
 EXPNO 11  
 PROCNO 1

F2 - Acquisition Parameters  
 Date\_ 20110217  
 Time 3.18  
 INSTRUM spect  
 PROBHD 5 mm PABBO BB-  
 PULPROG zgpg30  
 TD 65536  
 SOLVENT DMSO  
 NS 1024  
 DS 4  
 SWH 15000.000 Hz  
 FIDRES 0.228882 Hz  
 AQ 2.1845834 sec  
 RG 2050  
 DW 33.333 usec  
 DE 10.00 usec  
 TE 297.9 K  
 D1 2.0000000 sec  
 d11 0.03000000 sec  
 DELTA 1.89999998 sec  
 TD0 1

===== CHANNEL f1 =====  
 NUC1 13C  
 P1 10.00 usec  
 PL1 -1.00 dB  
 SFO1 62.9015280 MHz

===== CHANNEL f2 =====  
 CPDPRG2 waltz16  
 NUC2 1H  
 PCPD2 70.00 usec  
 PL12 15.00 dB  
 PL13 15.00 dB  
 PL2 -2.50 dB  
 SFO2 250.1310005 MHz

F2 - Processing parameters  
 SI 32768  
 SF 62.8952687 MHz  
 WDW EM  
 SSB 0  
 LB 1.00 Hz  
 GB 0  
 PC 1.40

Savych IS-73 1H DMSO

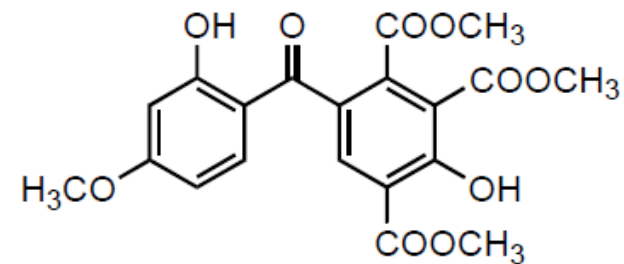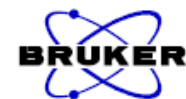

Current Data Parameters  
 NAME 110310.u323  
 EXPNO 10  
 PROCNO 1

F2 - Acquisition Parameters  
 Date\_ 20110310  
 Time 11.17  
 INSTRUM spect  
 PROBHD 5 mm PABBO BB-  
 PULPROG zg30  
 TD 65536  
 SOLVENT DMSO  
 NS 16  
 DS 2  
 SWH 6188.119 Hz  
 FIDRES 0.094423 Hz  
 AQ 5.2953587 sec  
 RG 114  
 DW 80.800 usec  
 DE 10.00 usec  
 TE 298.2 K  
 D1 1.00000000 sec  
 TD0 1

===== CHANNEL f1 =====  
 NUC1 1H  
 P1 10.00 usec  
 PL1 0.00 dB  
 PL1W 11.25325108 W  
 SFO1 300.1318534 MHz

F2 - Processing parameters  
 SI 32768  
 SF 300.1300056 MHz  
 WDW EM  
 SSB 0  
 LB 0.30 Hz  
 GB 0  
 PC 1.00

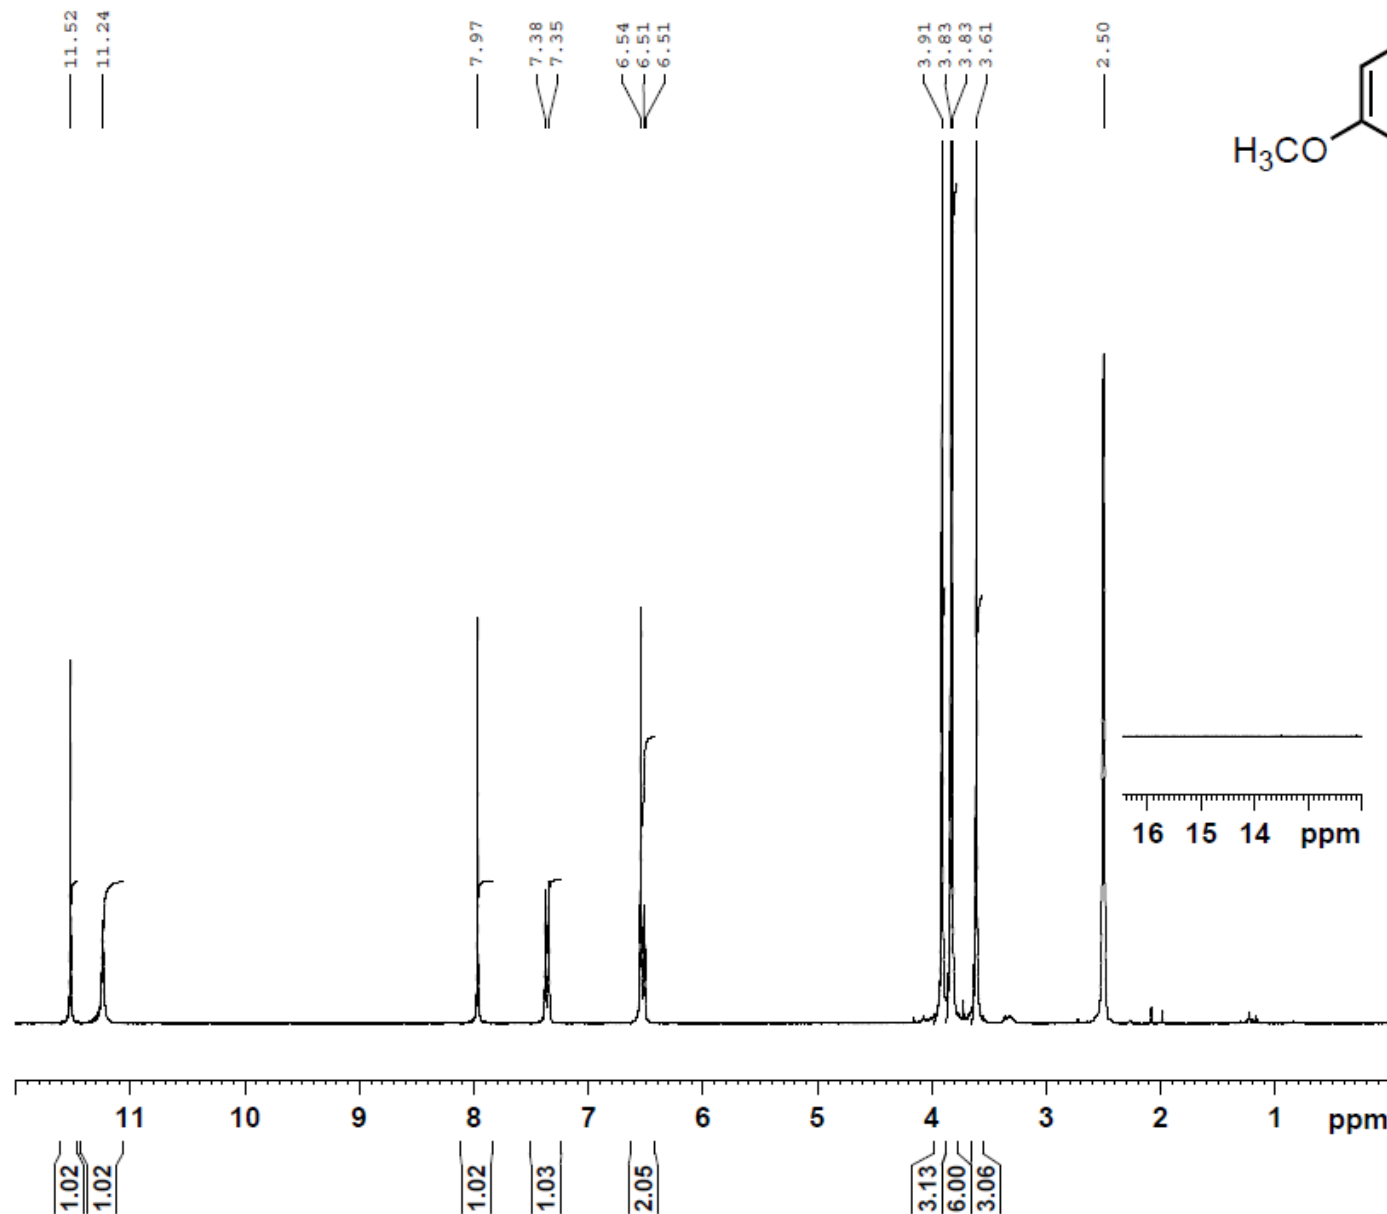



Savych IS-73 13C DMSO

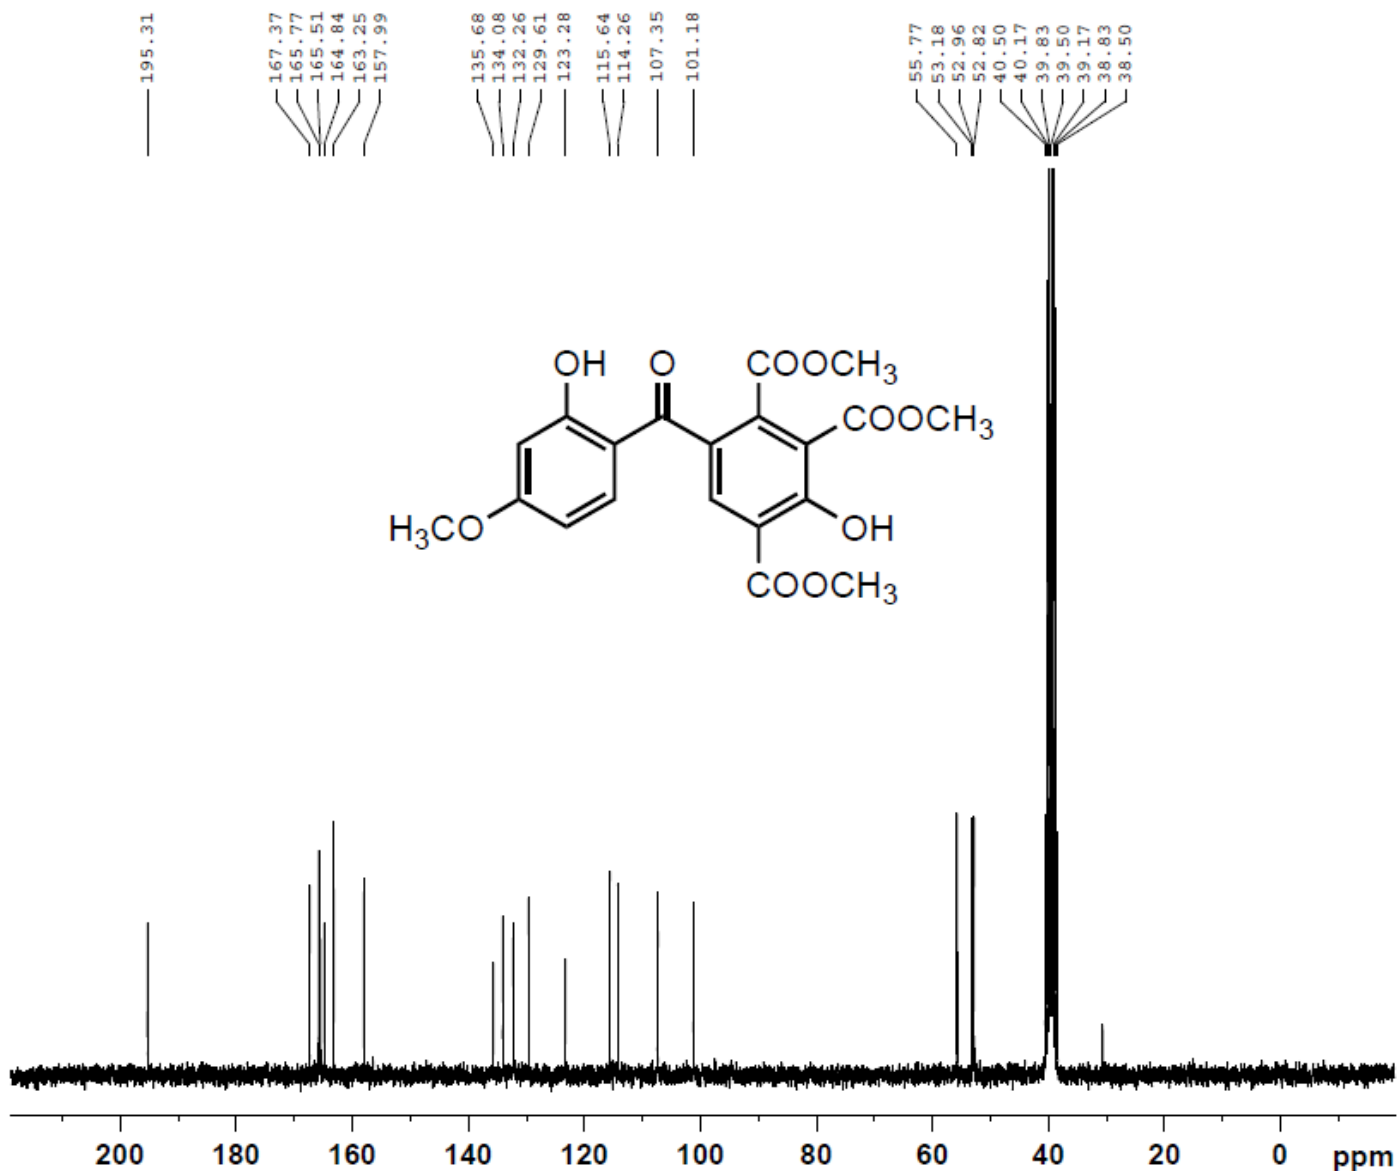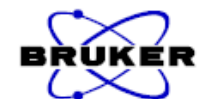

Current Data Parameters

NAME 110314.225 IS-73  
EXPNO 10  
PROCNO 1

F2 - Acquisition Parameters

Date\_ 20110315  
Time 7.20  
INSTRUM spect  
PROBHD 5 mm PABBO BB-  
PULPROG zgpg30  
TD 65536  
SOLVENT DMSO  
NS 1024  
DS 4  
SWH 15000.000 Hz  
FIDRES 0.228882 Hz  
AQ 2.1845834 sec  
RG 2050  
DW 33.333 usec  
DE 10.00 usec  
TE 298.0 K  
D1 2.00000000 sec  
d11 0.03000000 sec  
DELTA 1.89999998 sec  
TD0 1

===== CHANNEL f1 =====

NUC1 13C  
P1 10.00 usec  
PL1 -1.00 dB  
SFO1 62.9015280 MHz

===== CHANNEL f2 =====

CPDPRG2 waltz16  
NUC2 1H  
PCPD2 70.00 usec  
PL12 15.00 dB  
PL13 15.00 dB  
PL2 -2.50 dB  
SFO2 250.1310005 MHz

F2 - Processing parameters

SI 32768  
SF 62.8952687 MHz  
WDW EM  
SSB 0  
LB 1.00 Hz  
GB 0  
PC 1.40

Savych, IS-74, DMSO, 1H

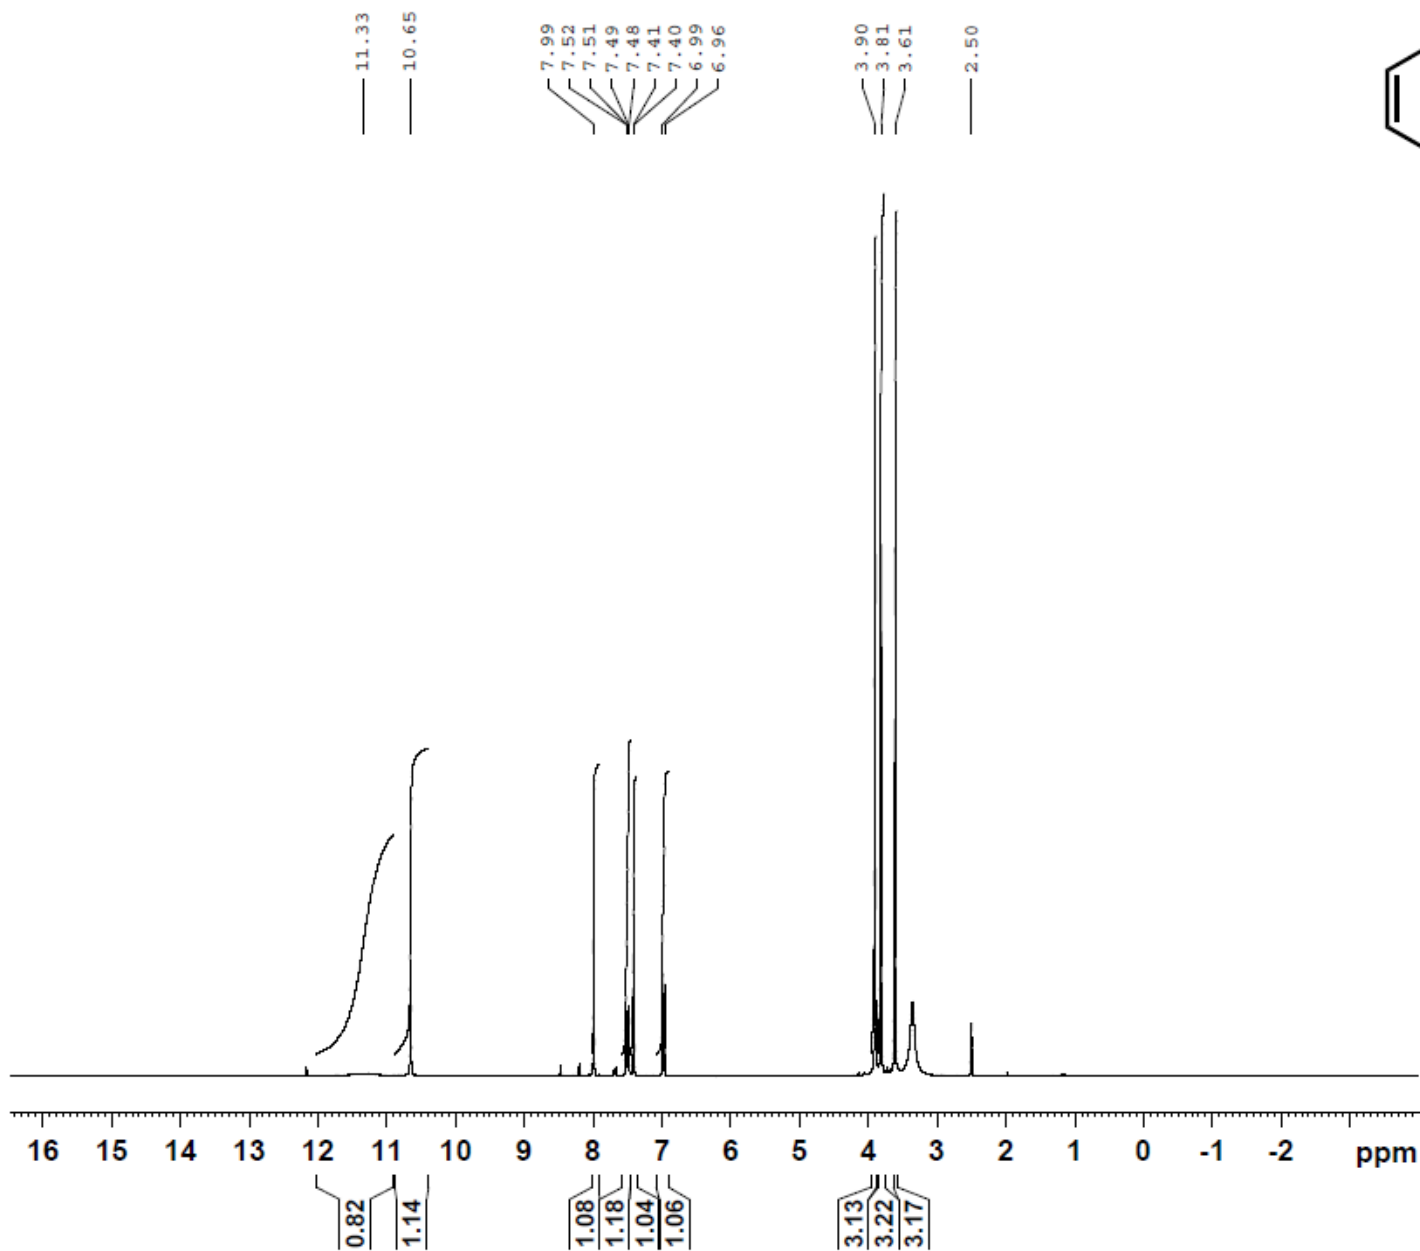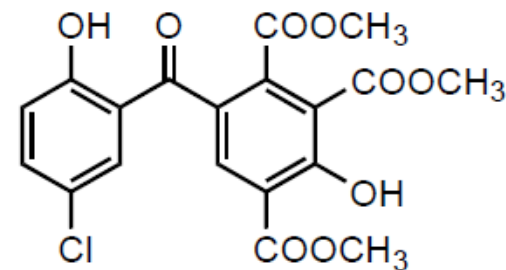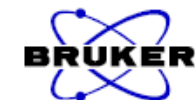

Current Data Parameters  
 NAME 110822.u319 IS-74  
 EXPNO 10  
 PROCNO 1

F2 - Acquisition Parameters  
 Date\_ 20110822  
 Time 14.55  
 INSTRUM spect  
 PROBHD 5 mm PABBO BB-  
 PULPROG zg30  
 TD 65536  
 SOLVENT DMSO  
 NS 16  
 DS 2  
 SWH 6188.119 Hz  
 FIDRES 0.094423 Hz  
 AQ 5.2953587 sec  
 RG 101  
 DW 80.800 usec  
 DE 10.00 usec  
 TE 298.2 K  
 D1 1.00000000 sec  
 TD0 1

===== CHANNEL f1 =====  
 NUC1 1H  
 P1 10.00 usec  
 PL1 0.00 dB  
 PL1W 11.25325108 W  
 SFO1 300.1318534 MHz

F2 - Processing parameters  
 SI 32768  
 SF 300.1300085 MHz  
 WDW EM  
 SSB 0  
 LB 0.30 Hz  
 GB 0  
 PC 1.00

Savych, IS-74, DMSO, 13C

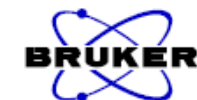

72

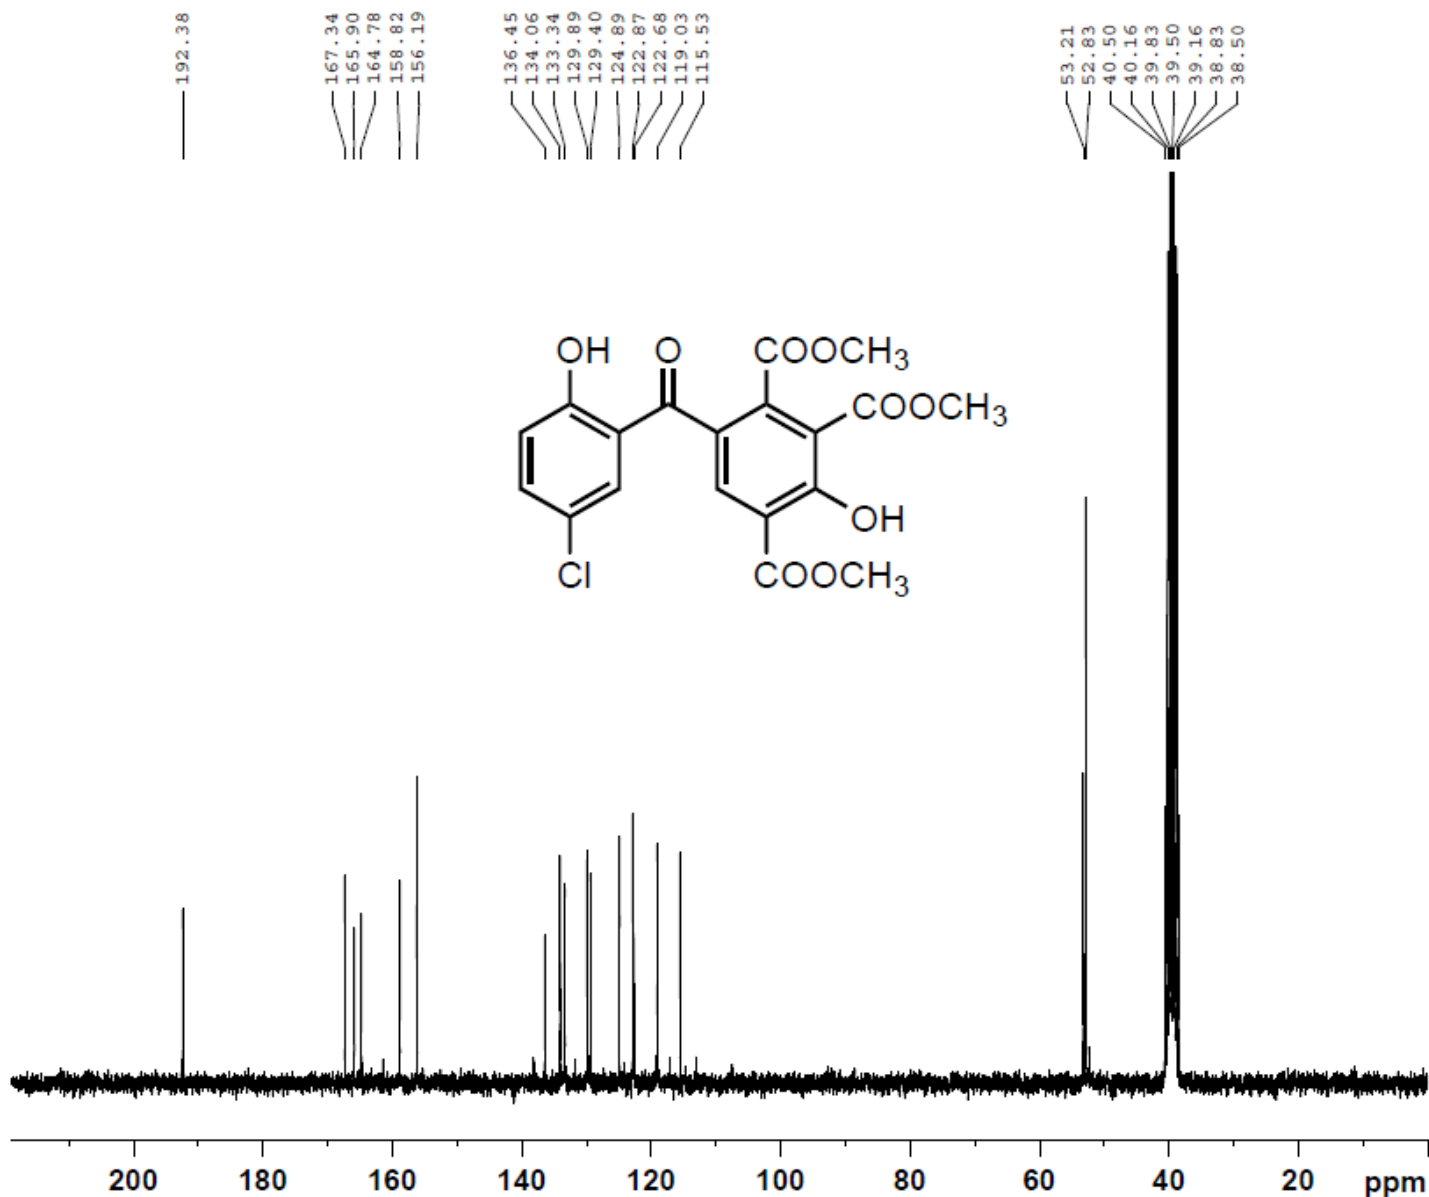

Current Data Parameters  
 NAME 110822.204  
 EXPNO 30  
 PROCNO 1

F2 - Acquisition Parameters  
 Date\_ 20110822  
 Time 17.05  
 INSTRUM spect  
 PROBHD 5 mm PABBO BB-  
 PULPROG zgpg30  
 TD 65536  
 SOLVENT DMSO  
 NS 1024  
 DS 4  
 SWH 15000.000 Hz  
 FIDRES 0.228882 Hz  
 AQ 2.1845834 sec  
 RG 2050  
 DW 33.333 usec  
 DE 10.00 usec  
 TE 298.8 K  
 D1 2.00000000 sec  
 d11 0.03000000 sec  
 DELTA 1.89999998 sec  
 TD0 1

===== CHANNEL f1 =====  
 NUC1 13C  
 P1 10.00 usec  
 PL1 -1.00 dB  
 SFO1 62.9015280 MHz

===== CHANNEL f2 =====  
 CPDPRG2 waltz16  
 NUC2 1H  
 PCPD2 70.00 usec  
 PL12 15.00 dB  
 PL13 15.00 dB  
 PL2 -2.50 dB  
 SFO2 250.1310005 MHz

F2 - Processing parameters  
 SI 32768  
 SF 62.8952674 MHz  
 WDW EM  
 SSB 0  
 LB 1.00 Hz  
 GB 0  
 PC 1.40

Savych IS-98.2M 1H DMSO

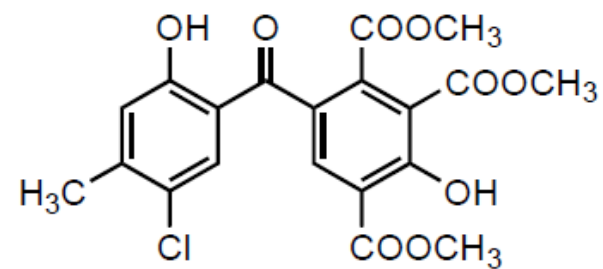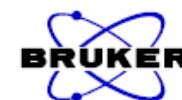

Current Data Parameters

NAME 110617.u307 IS-98.2M  
 EXPNO 10  
 PROCNO 1

F2 - Acquisition Parameters

Date\_ 20110617  
 Time 9.21  
 INSTRUM spect  
 PROBHD 5 mm PABBO BB-  
 PULPROG zg30  
 TD 65536  
 SOLVENT DMSO  
 NS 16  
 DS 2  
 SWH 6188.119 Hz  
 FIDRES 0.094423 Hz  
 AQ 5.2953587 sec  
 RG 101  
 DW 80.800 usec  
 DE 10.00 usec  
 TE 298.2 K  
 D1 1.00000000 sec  
 TD0 1

===== CHANNEL f1 =====

NUC1 1H  
 P1 10.00 usec  
 PL1 0.00 dB  
 PL1W 11.25325108 W  
 SFO1 300.1318534 MHz

F2 - Processing parameters

SI 32768  
 SF 300.1300075 MHz  
 WDW EM  
 SSB 0  
 LB 0.30 Hz  
 GB 0  
 PC 1.00

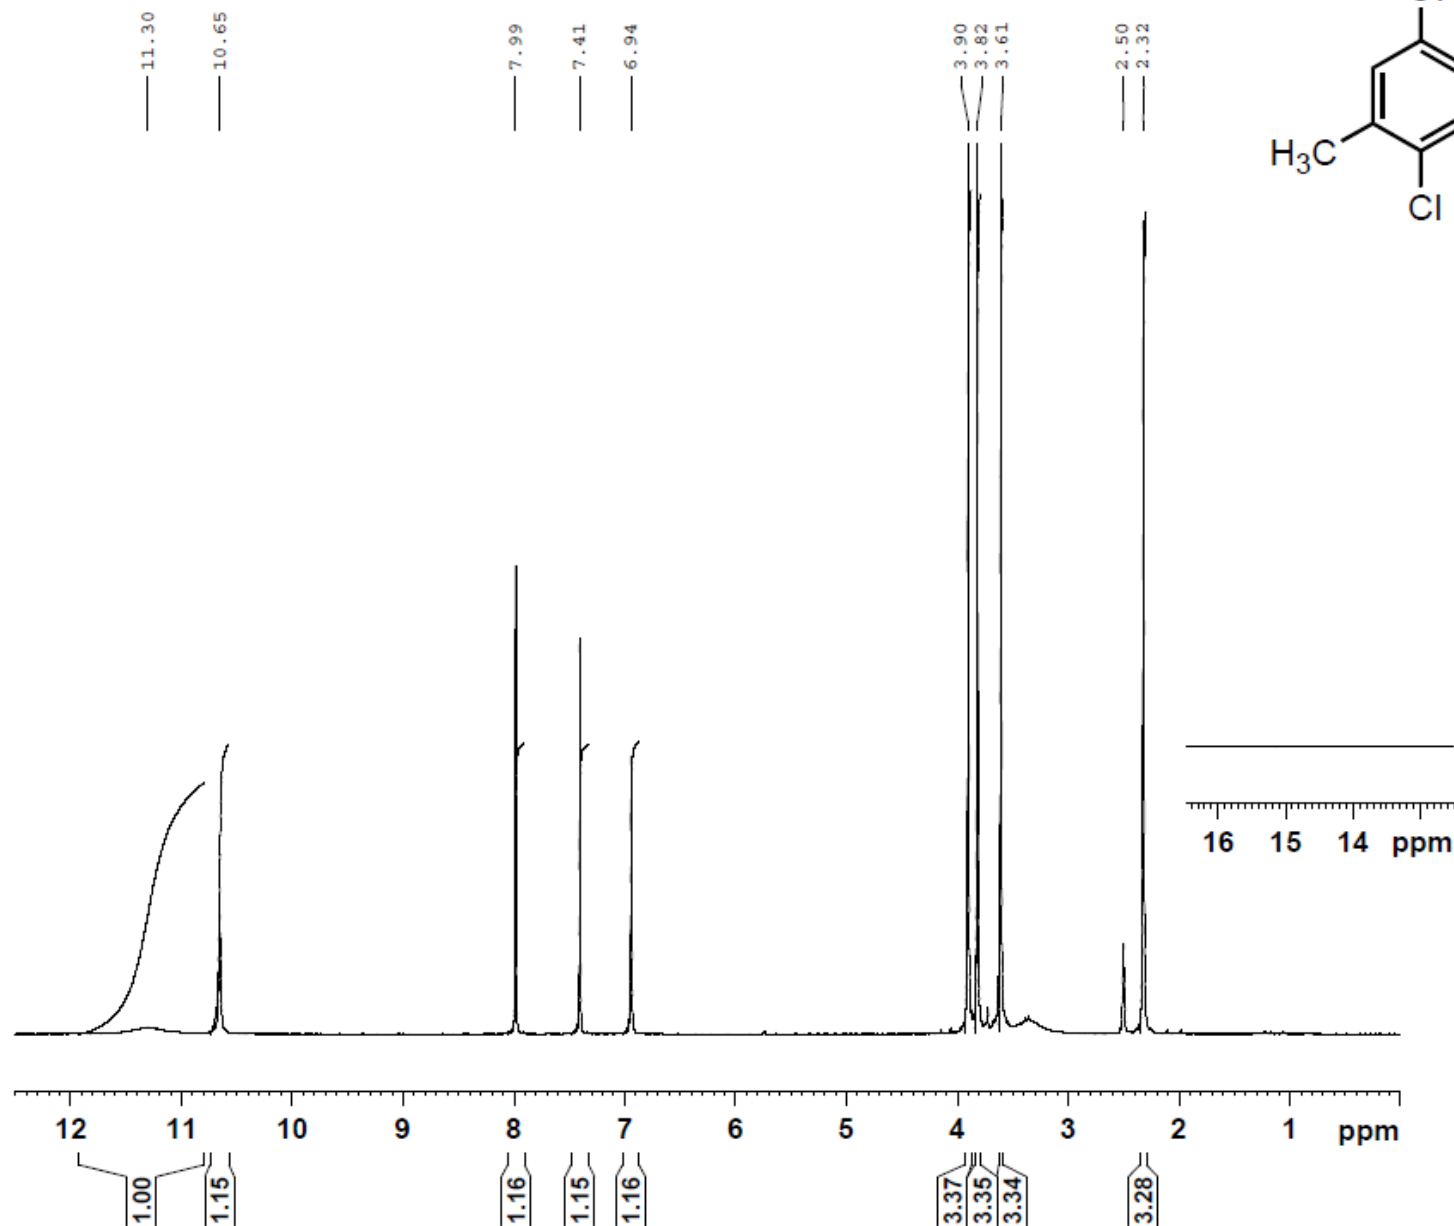

Savych IS-98.2M 13C DMSO

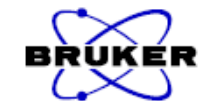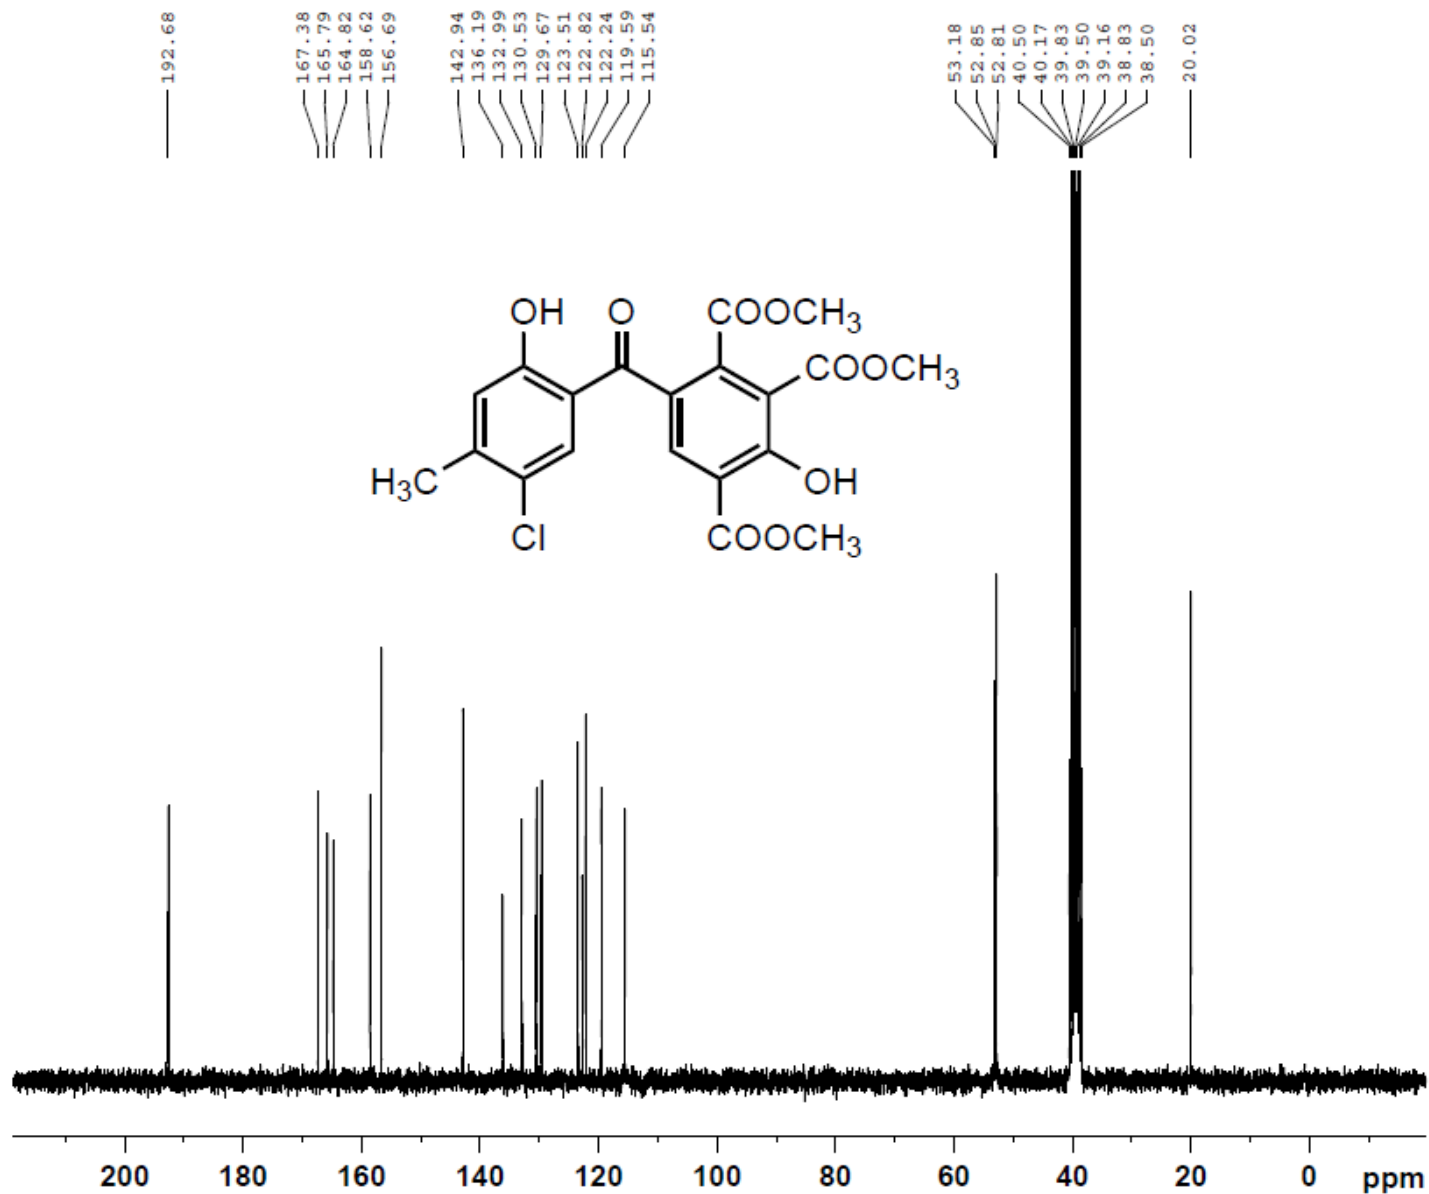

Current Data Parameters  
 NAME 110617.206 IS-98.2M  
 EXPNO 10  
 PROCNO 1

F2 - Acquisition Parameters  
 Date\_ 20110619  
 Time 7.49  
 INSTRUM spect  
 PROBHD 5 mm PABBO BB-  
 PULPROG zgpg30  
 TD 65536  
 SOLVENT DMSO  
 NS 1024  
 DS 4  
 SWH 15000.000 Hz  
 FIDRES 0.228882 Hz  
 AQ 2.1845834 sec  
 RG 2050  
 DW 33.333 usec  
 DE 10.00 usec  
 TE 298.0 K  
 D1 2.00000000 sec  
 d11 0.03000000 sec  
 DELTA 1.89999998 sec  
 TD0 1

===== CHANNEL f1 =====  
 NUC1 13C  
 P1 10.00 usec  
 PL1 -1.00 dB  
 SFO1 62.9015280 MHz

===== CHANNEL f2 =====  
 CPDPRG2 waltz16  
 NUC2 1H  
 PCPD2 70.00 usec  
 PL12 15.00 dB  
 PL13 15.00 dB  
 PL2 -2.50 dB  
 SFO2 250.1310005 MHz

F2 - Processing parameters  
 SI 32768  
 SF 62.8952678 MHz  
 WDW EM  
 SSB 0  
 LB 1.00 Hz  
 GB 0  
 PC 1.40

Savych IS-100.3 1H CDC13

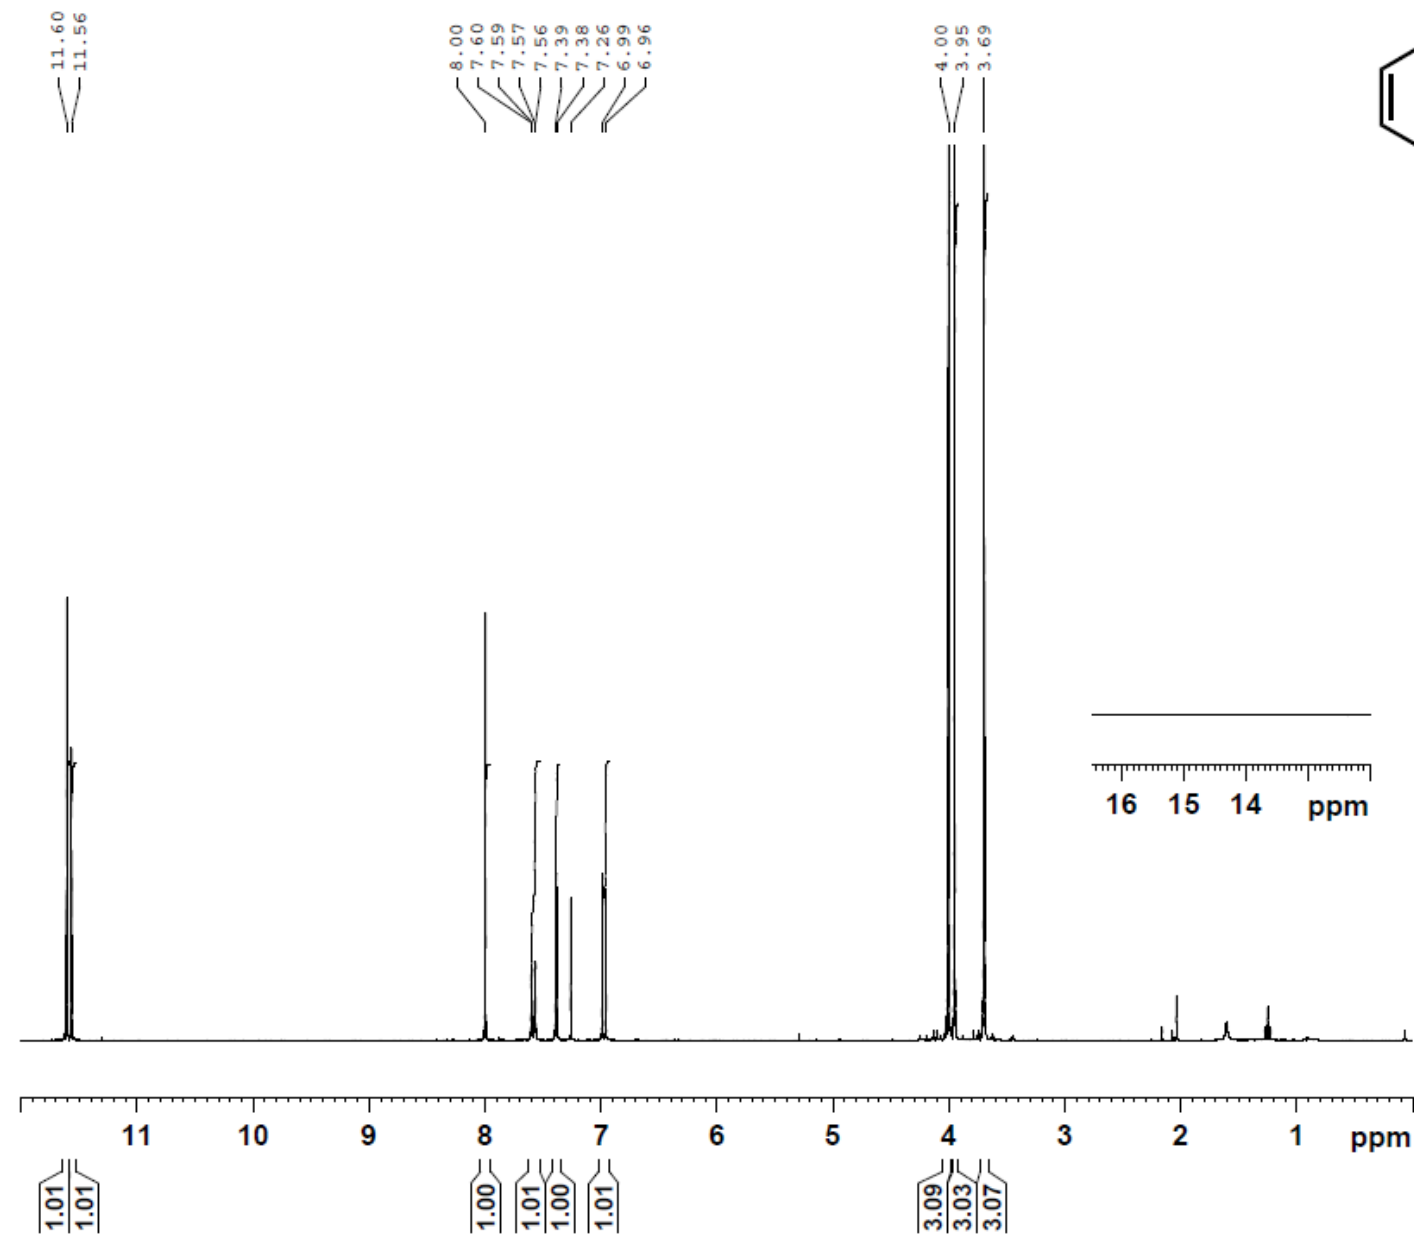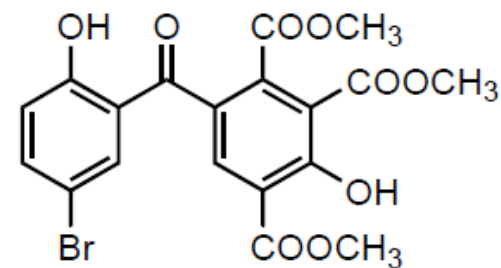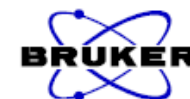

Current Data Parameters

NAME 110513.u358 IS-100.3  
EXPNO 10  
PROCNO 1

F2 - Acquisition Parameters

Date\_ 20110516  
Time 7.44  
INSTRUM spect  
PROBHD 5 mm PABBO BB-  
PULPROG zg30  
TD 65536  
SOLVENT CDC13  
NS 16  
DS 2  
SWH 6188.119 Hz  
FIDRES 0.094423 Hz  
AQ 5.2953587 sec  
RG 144  
DW 80.800 usec  
DE 10.00 usec  
TE 298.2 K  
D1 1.0000000 sec  
TD0 1

===== CHANNEL f1 =====

NUC1 1H  
P1 10.00 usec  
PL1 0.00 dB  
PL1W 11.25325108 W  
SFO1 300.1318534 MHz

F2 - Processing parameters

SI 32768  
SF 300.1300081 MHz  
WDW EM  
SSB 0  
LB 0.30 Hz  
GB 0  
PC 1.00

Savych IS-100.3 13C CDCl3

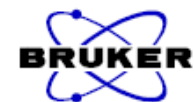

Current Data Parameters  
 NAME 110513.u358 IS-100.3  
 EXPNO 11  
 PROCNO 1

F2 - Acquisition Parameters  
 Date\_ 20110516  
 Time 7.59  
 INSTRUM spect  
 PROBHD 5 mm PABBO BB-  
 PULPROG zgpg30  
 TD 65536  
 SOLVENT CDCl3  
 NS 512  
 DS 4  
 SWH 18028.846 Hz  
 FIDRES 0.275098 Hz  
 AQ 1.8175818 sec  
 RG 2050  
 DW 27.733 usec  
 DE 10.00 usec  
 TE 298.2 K  
 D1 2.0000000 sec  
 D11 0.03000000 sec  
 TD0 1

===== CHANNEL f1 =====  
 NUC1 13C  
 P1 10.00 usec  
 PL1 -0.50 dB  
 PL1W 33.25691986 W  
 SFO1 75.4752953 MHz

===== CHANNEL f2 =====  
 CPDPRG2 waltz16  
 NUC2 1H  
 PCPD2 72.00 usec  
 PL2 0.00 dB  
 PL12 17.00 dB  
 PL13 17.00 dB  
 PL2W 11.25325108 W  
 PL12W 0.22453187 W  
 PL13W 0.22453187 W  
 SFO2 300.1312005 MHz

F2 - Processing parameters  
 SI 32768  
 SF 75.4677520 MHz  
 WDW EM  
 SSB 0  
 LB 1.00 Hz  
 GB 0  
 PC 1.40

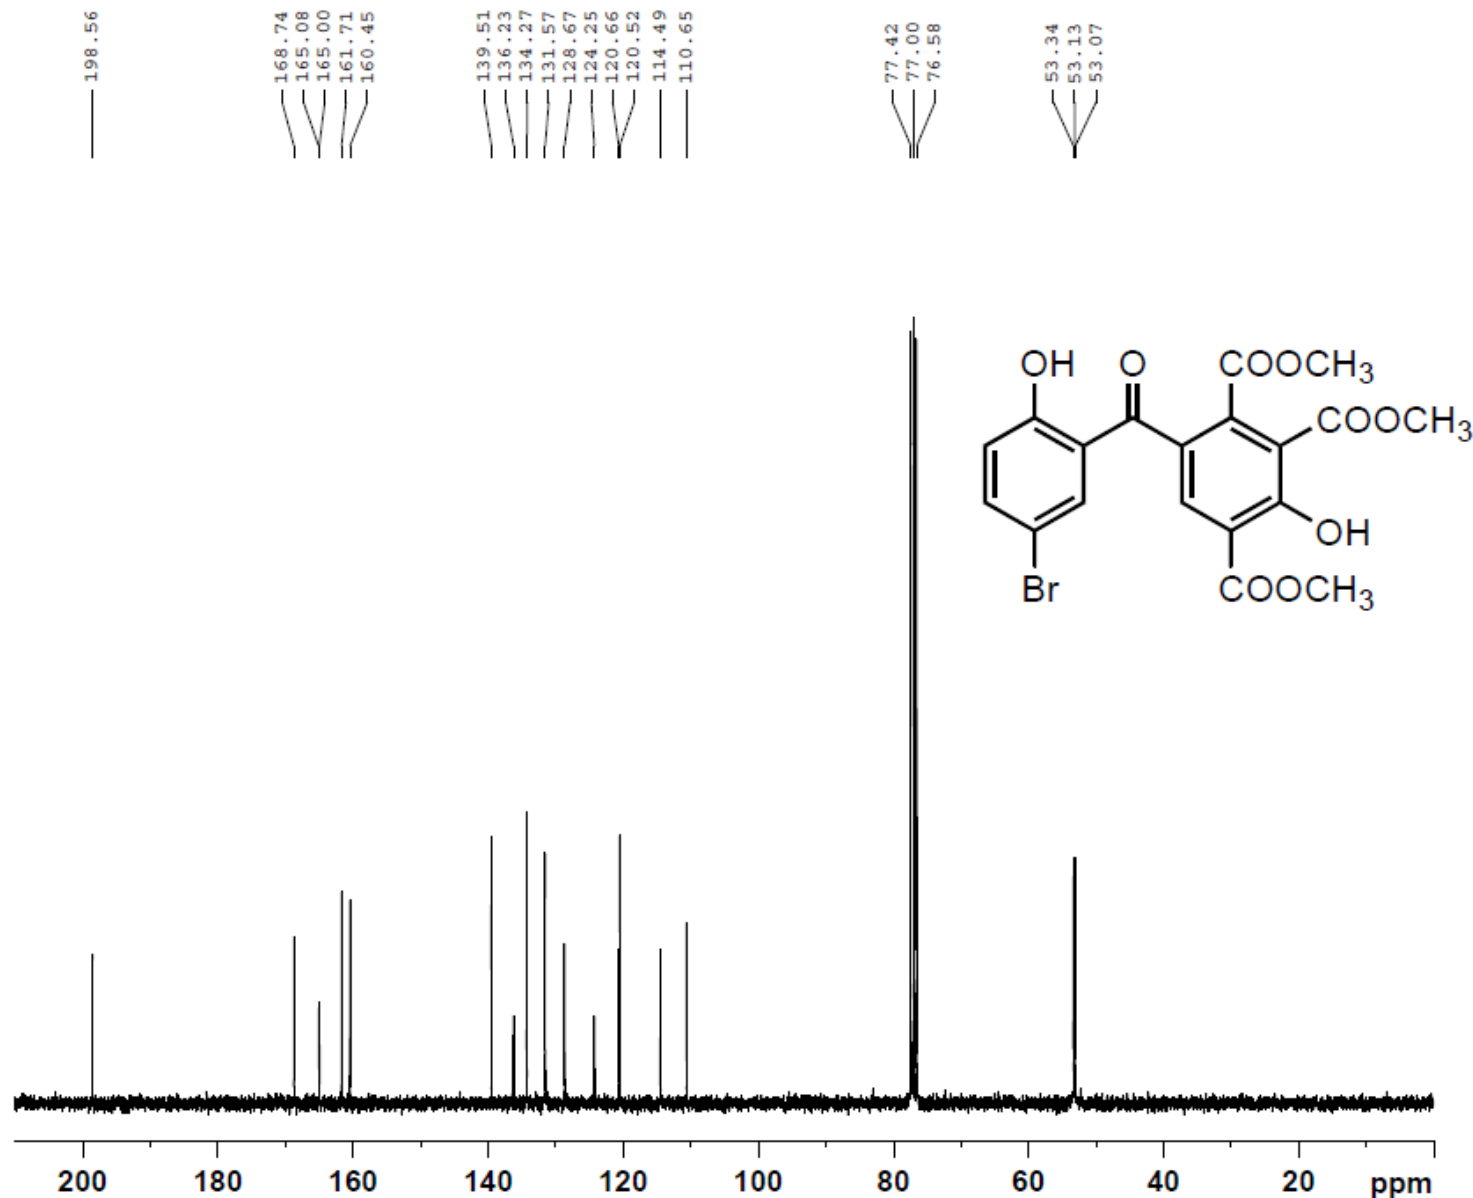

Savych IS-III! 1H CDCl3

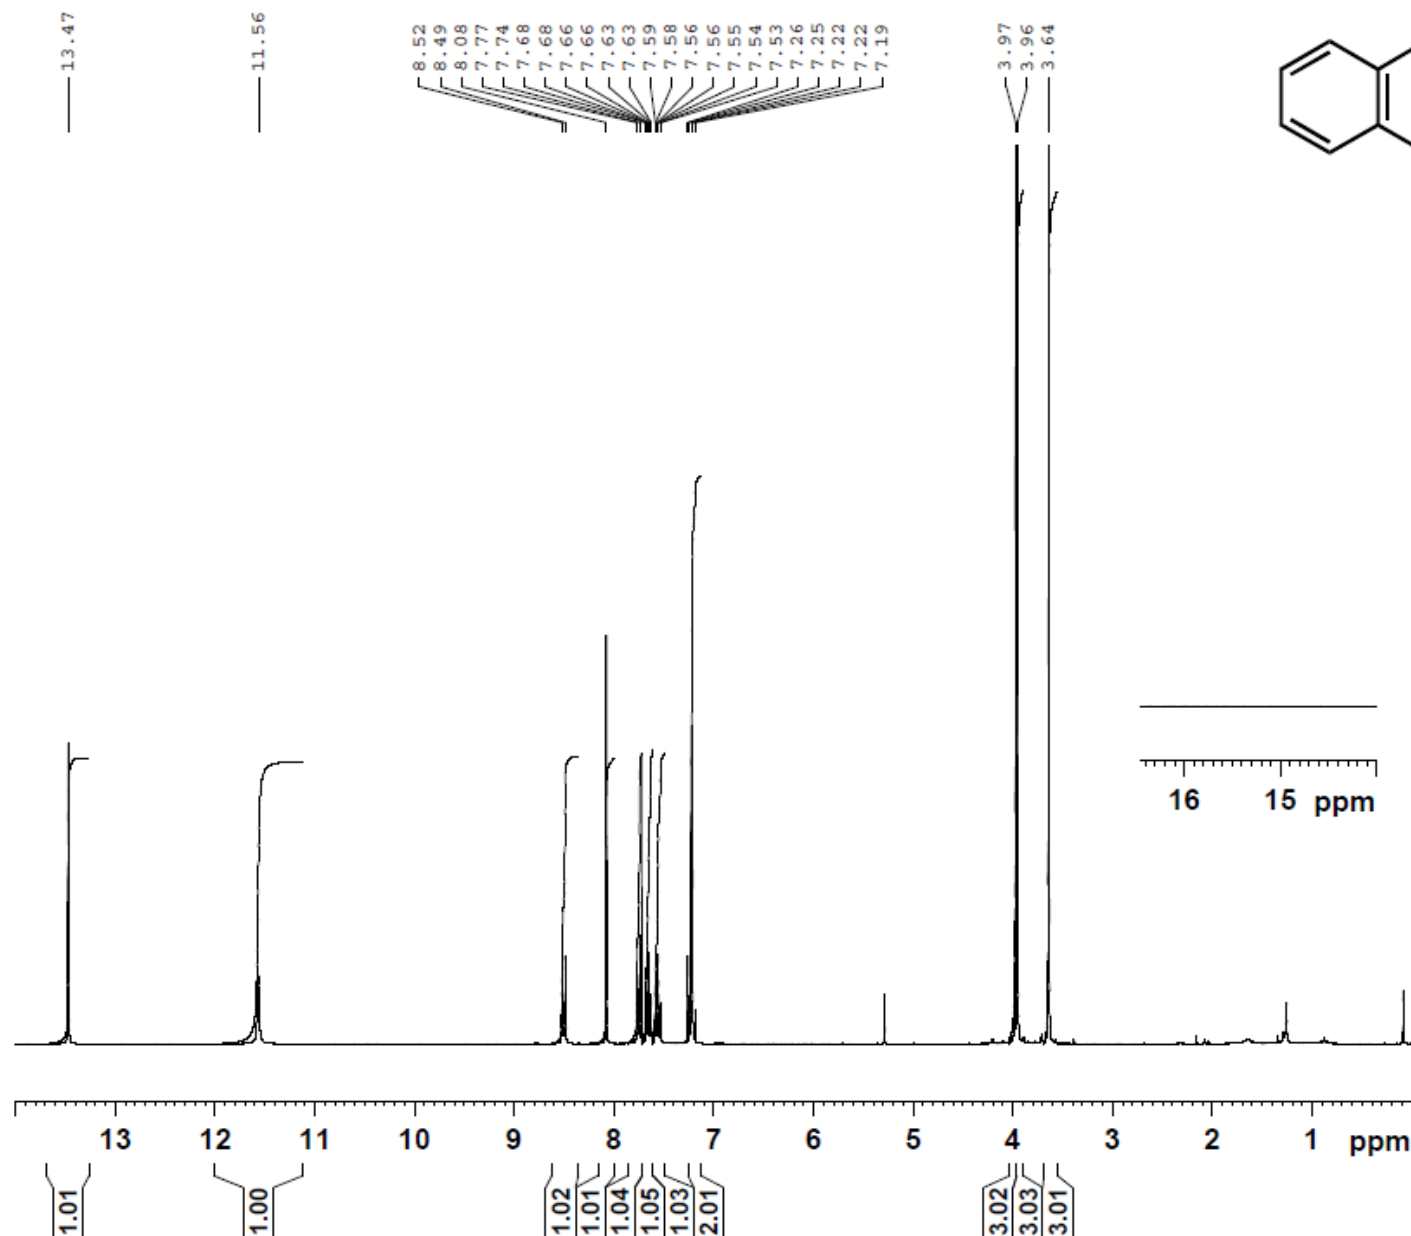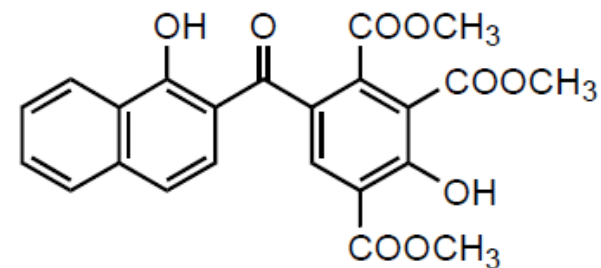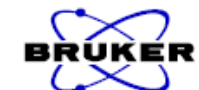

Current Data Parameters  
NAME 110517.u327 IS-111!  
EXPNO 10  
PROCNO 1

F2 - Acquisition Parameters  
Date\_ 20110517  
Time 13.18  
INSTRUM spect  
PROBHD 5 mm PABBO BB-  
PULPROG zg30  
TD 65536  
SOLVENT CDCl3  
NS 16  
DS 2  
SWH 6188.119 Hz  
FIDRES 0.094423 Hz  
AQ 5.2953587 sec  
RG 80.6  
DW 80.800 usec  
DE 10.00 usec  
TE 298.2 K  
D1 1.0000000 sec  
TD0 1

===== CHANNEL f1 =====  
NUC1 1H  
P1 10.00 usec  
PL1 0.00 dB  
PL1W 11.25325108 W  
SFO1 300.1318534 MHz

F2 - Processing parameters  
SI 32768  
SF 300.1300086 MHz  
WDW EM  
SSB 0  
LB 0.30 Hz  
GB 0  
PC 1.00



Savych IS-III! 13C CDCl3

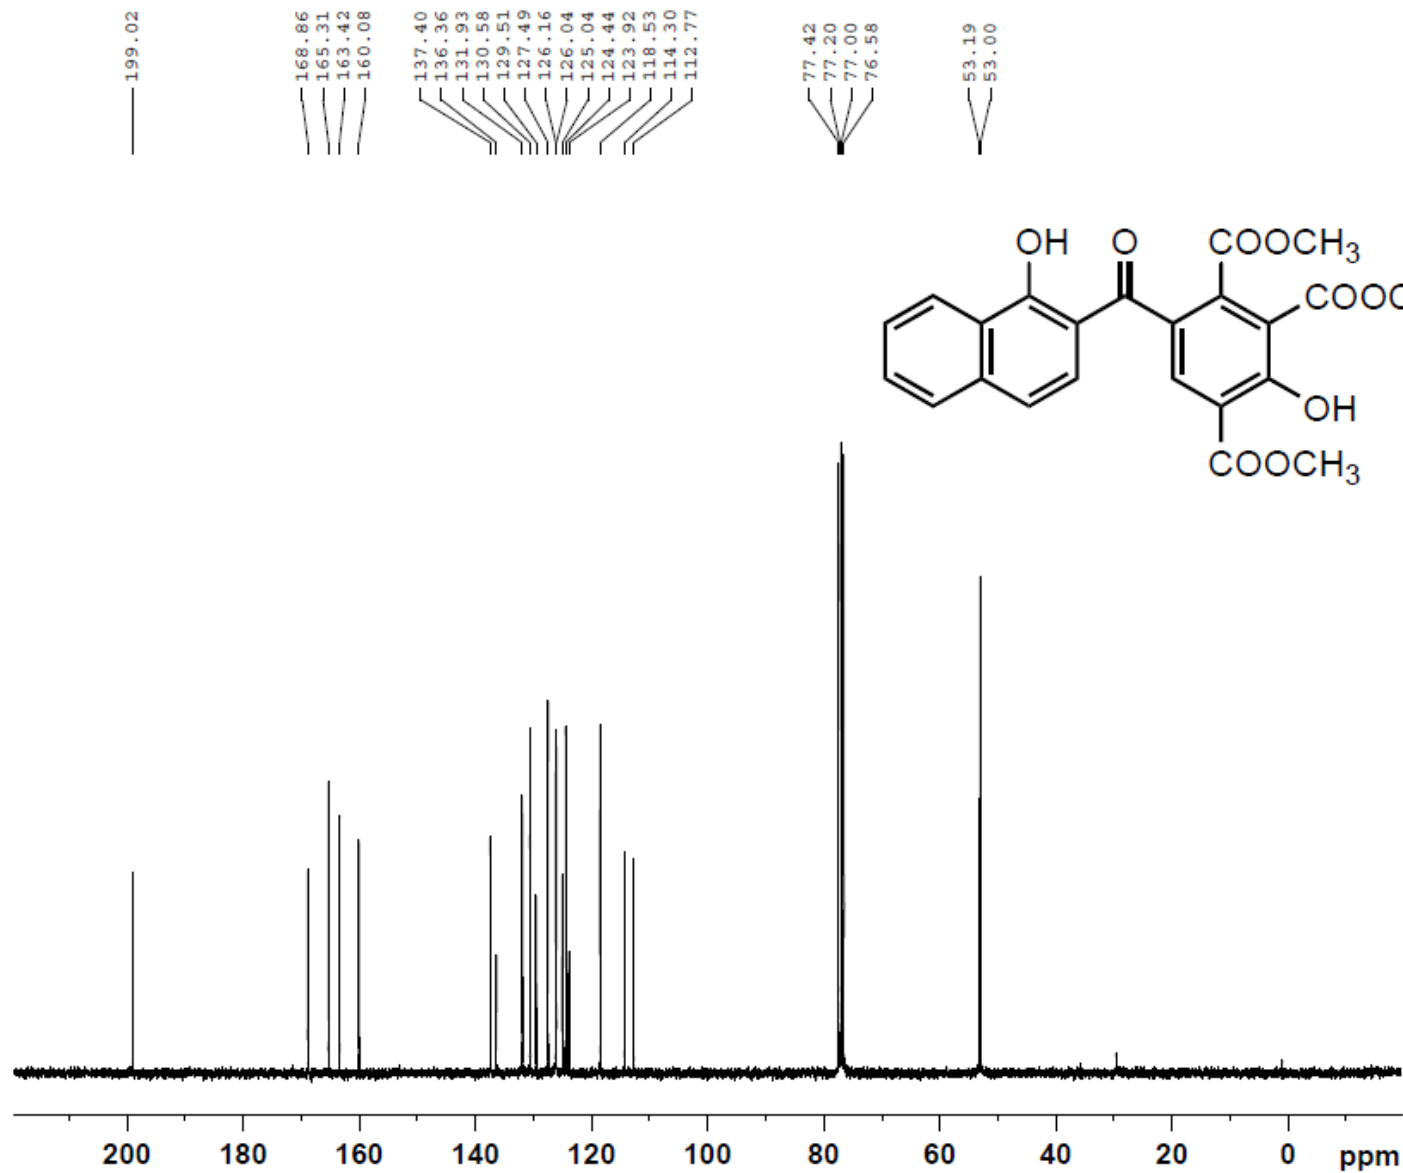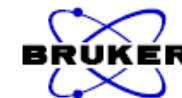

Current Data Parameters  
NAME 110517.u327 IS-111  
EXPNO 11  
PROCNO 1

F2 - Acquisition Parameters  
Date\_ 20110518  
Time\_ 5.04  
INSTRUM spect  
PROBHD 5 mm PABBO BB-  
PULPROG zgpg30  
TD 65536  
SOLVENT CDCl3  
NS 768  
DS 4  
SWH 18028.846 Hz  
FIDRES 0.275098 Hz  
AQ 1.8175818 sec  
RG 2050  
DW 27.733 usec  
DE 10.00 usec  
TE 298.2 K  
D1 2.00000000 sec  
D11 0.03000000 sec  
TD0 1

===== CHANNEL f1 =====  
NUC1 13C  
P1 10.00 usec  
PL1 -0.50 dB  
PL1W 33.25691986 W  
SFO1 75.4752953 MHz

===== CHANNEL f2 =====  
CPDPRG2 waltz16  
NUC2 1H  
PCPD2 72.00 usec  
PL2 0.00 dB  
PL12 17.00 dB  
PL13 17.00 dB  
PL2W 11.25325108 W  
PL12W 0.22453187 W  
PL13W 0.22453187 W  
SFO2 300.1312005 MHz

F2 - Processing parameters  
SI 32768  
SF 75.4677542 MHz  
WDW EM  
SSB 0  
LB 1.00 Hz  
GB 0  
PC 1.40

Savych IS-201 1H DMSO

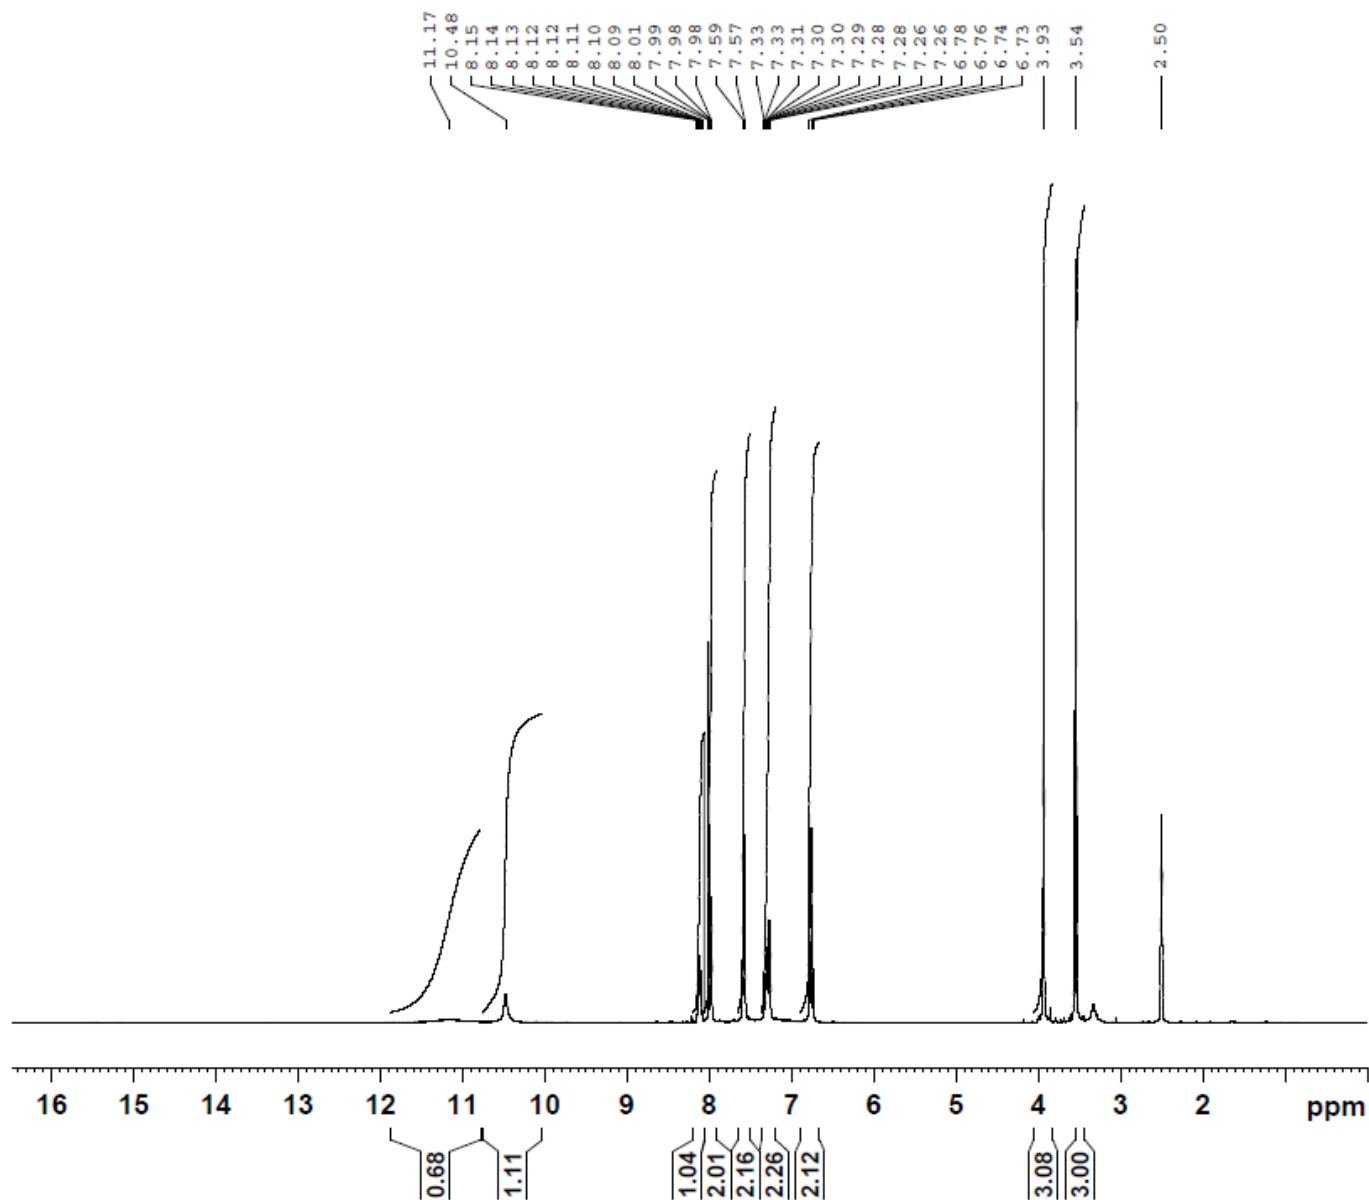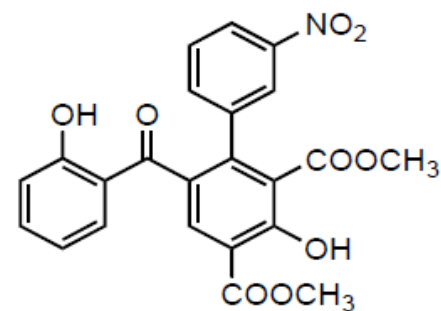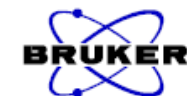

Current Data Parameters  
 NAME 120127.u306 IS-201  
 EXPNO 10  
 PROCNO 1

F2 - Acquisition Parameters  
 Date\_ 20120127  
 Time 8.33  
 INSTRUM spect  
 PROBHD 5 mm PABBO BB-  
 PULPROG zg30  
 TD 65536  
 SOLVENT DMSO  
 NS 16  
 DS 2  
 SWH 6188.119 Hz  
 FIDRES 0.094423 Hz  
 AQ 5.2953587 sec  
 RG 114  
 DW 80.800 usec  
 DE 10.00 usec  
 TE 298.2 K  
 D1 1.00000000 sec  
 TD0 1

===== CHANNEL f1 =====  
 NUC1 1H  
 P1 10.00 usec  
 PL1 0.00 dB  
 PL1W 11.25325108 W  
 SFO1 300.1318534 MHz

F2 - Processing parameters  
 SI 32768  
 SF 300.1300058 MHz  
 WDW EM  
 SSB 0  
 LB 0.30 Hz  
 GB 0  
 PC 1.00

Savych IS-201 13C DMSO

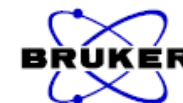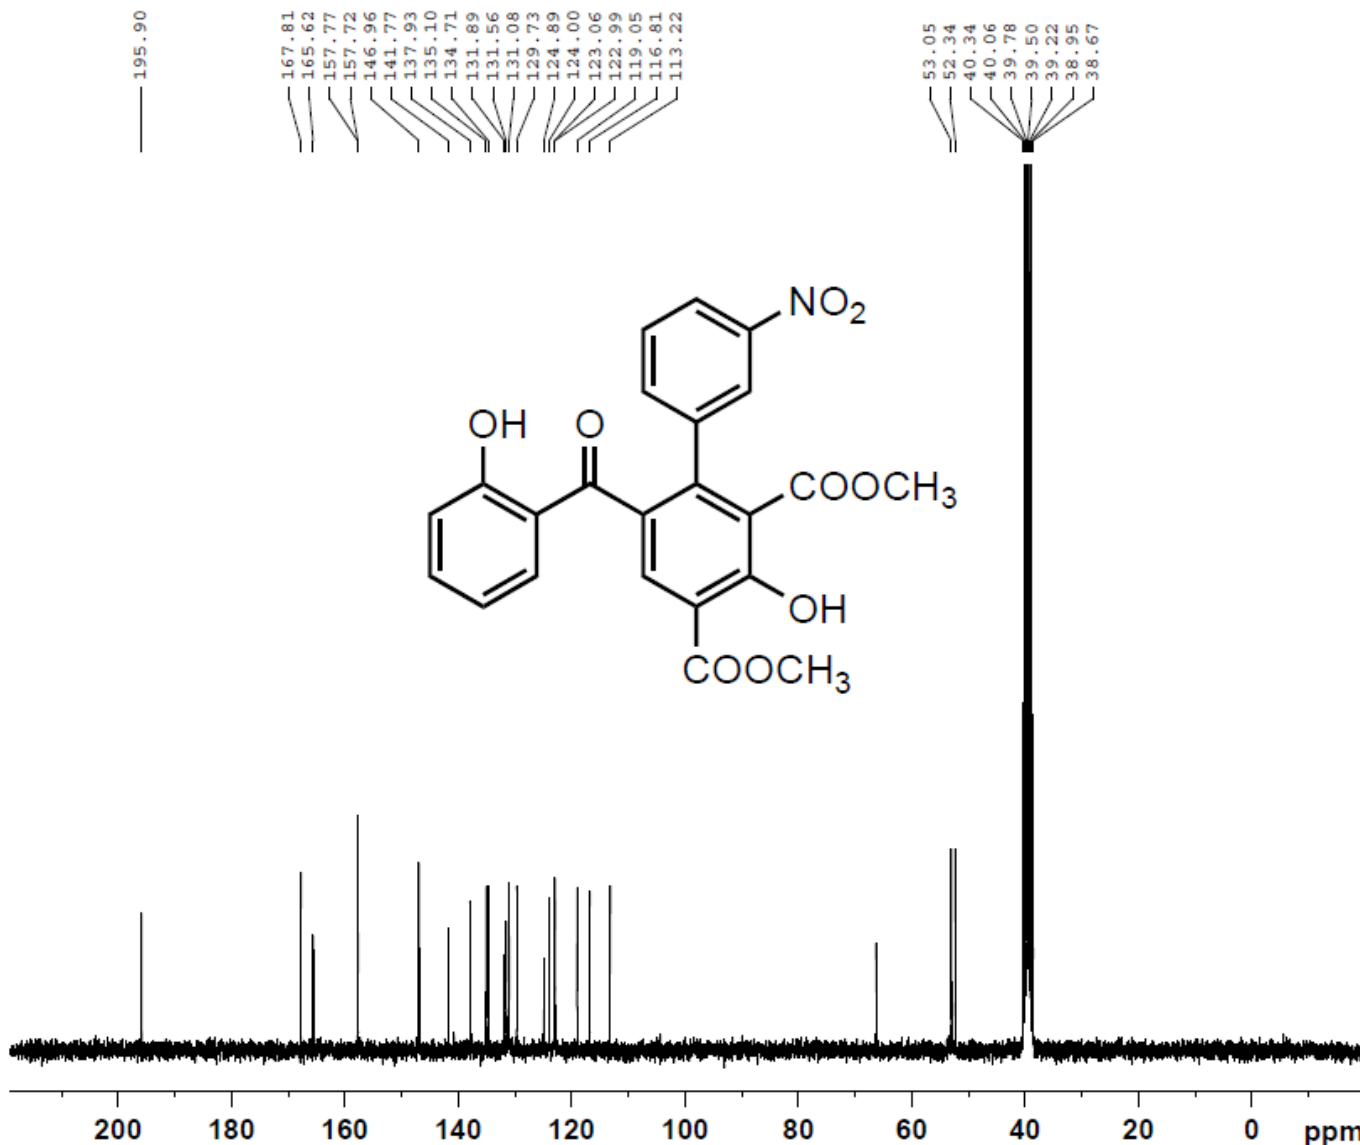

Current Data Parameters  
NAME 120127.u306 IS-201  
EXPNO 11  
PROCNO 1

F2 - Acquisition Parameters  
Date\_ 20120128  
Time 13.57  
INSTRUM spect  
PROBHD 5 mm PABBO BB-  
PULPROG zgpg30  
TD 65536  
SOLVENT DMSO  
NS 1024  
DS 4  
SWH 18028.846 Hz  
FIDRES 0.275098 Hz  
AQ 1.8175818 sec  
RG 2050  
DW 27.733 usec  
DE 10.00 usec  
TE 298.2 K  
D1 2.00000000 sec  
D11 0.03000000 sec  
TD0 1

===== CHANNEL f1 =====  
NUC1 13C  
P1 10.00 usec  
PL1 -0.50 dB  
PL1W 33.25691986 W  
SFO1 75.4752953 MHz

===== CHANNEL f2 =====  
CPDPRG2 waltz16  
NUC2 1H  
PCPD2 72.00 usec  
PL2 0.00 dB  
PL12 17.00 dB  
PL13 17.00 dB  
PL2W 11.25325108 W  
PL12W 0.22453187 W  
PL13W 0.22453187 W  
SFO2 300.1312005 MHz

F2 - Processing parameters  
SI 32768  
SF 75.4677870 MHz  
WDW EM  
SSB 0  
LB 1.00 Hz  
GB 0  
PC 1.40

Savych IS-199 1H DMSO

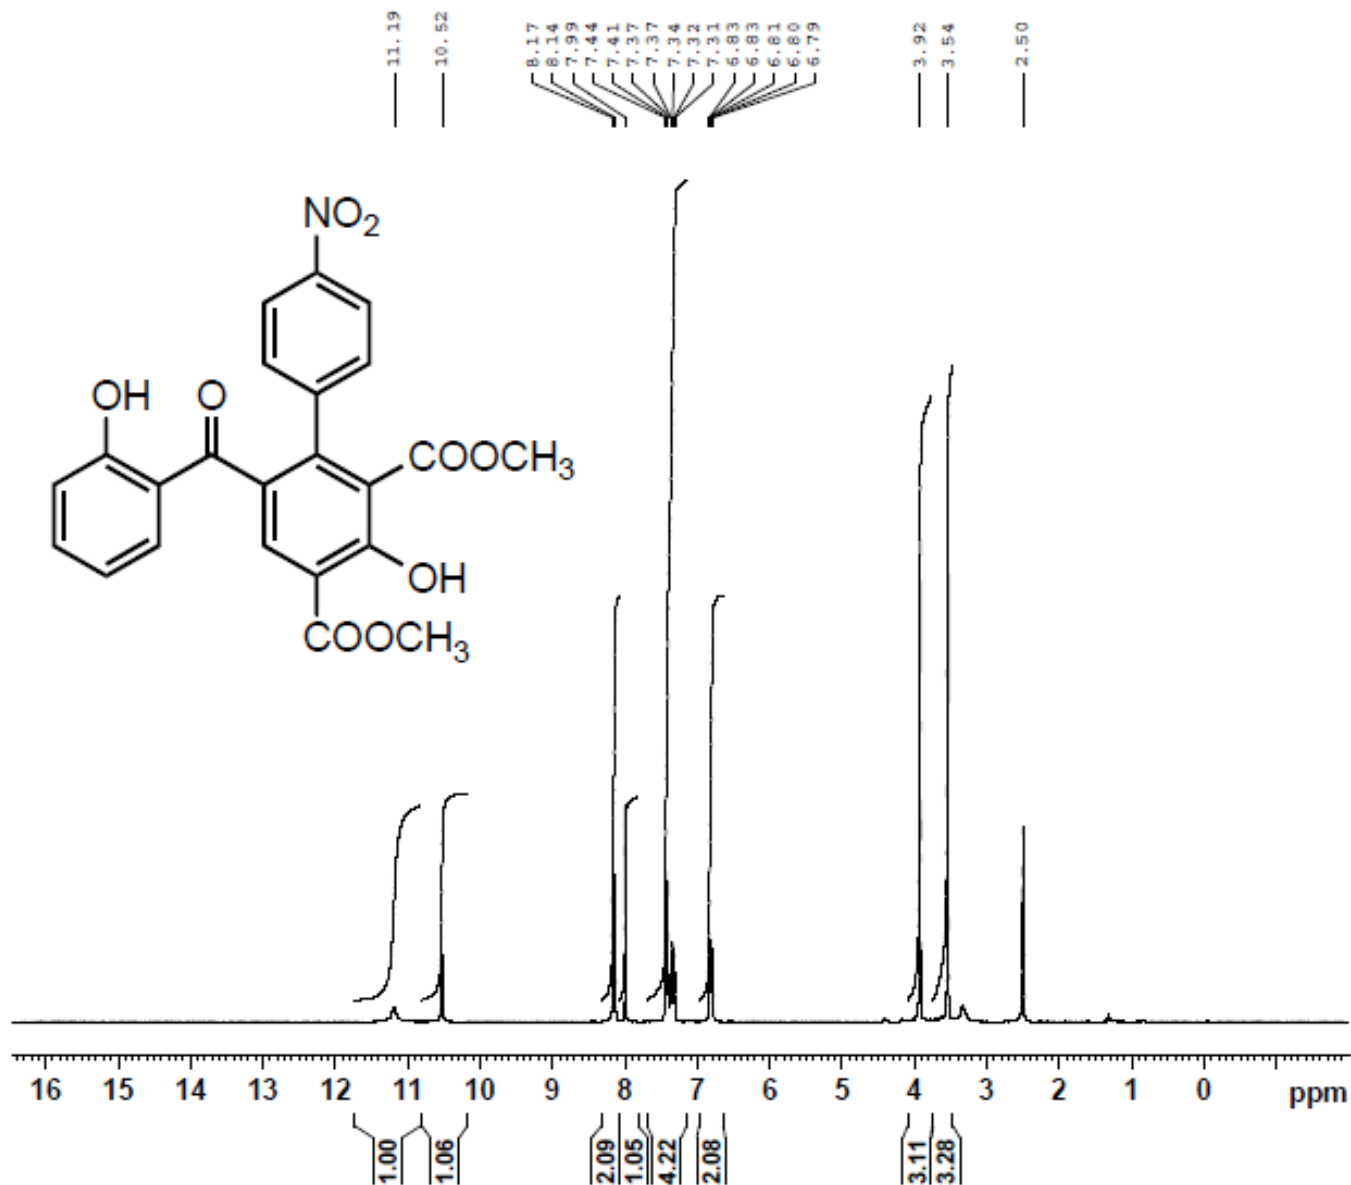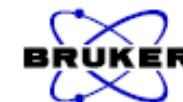

Current Data Parameters  
NAME 120320.u303 IS-199  
EXPNO 10  
PROCNO 1

F2 - Acquisition Parameters  
Date\_ 20120320  
Time 8.20  
INSTRUM spect  
PROBHD 5 mm PABBO BB-  
PULPROG zg30  
TD 65536  
SOLVENT DMSO  
NS 16  
DS 2  
SWH 6188.119 Hz  
FIDRES 0.094423 Hz  
AQ 5.2953587 sec  
RG 90.5  
DW 80.800 usec  
DE 10.00 usec  
TE 298.2 K  
D1 1.0000000 sec  
TD0 1

===== CHANNEL f1 =====  
NUC1 1H  
P1 10.00 usec  
PL1 0.00 dB  
PL1W 11.25325108 W  
SFO1 300.1318534 MHz

F2 - Processing parameters  
SI 32768  
SF 300.1300073 MHz  
WDW EM  
SSB 0  
LB 0.30 Hz  
GB 0  
PC 1.00

Savych IS-199 13C DMSO

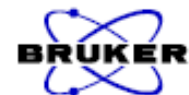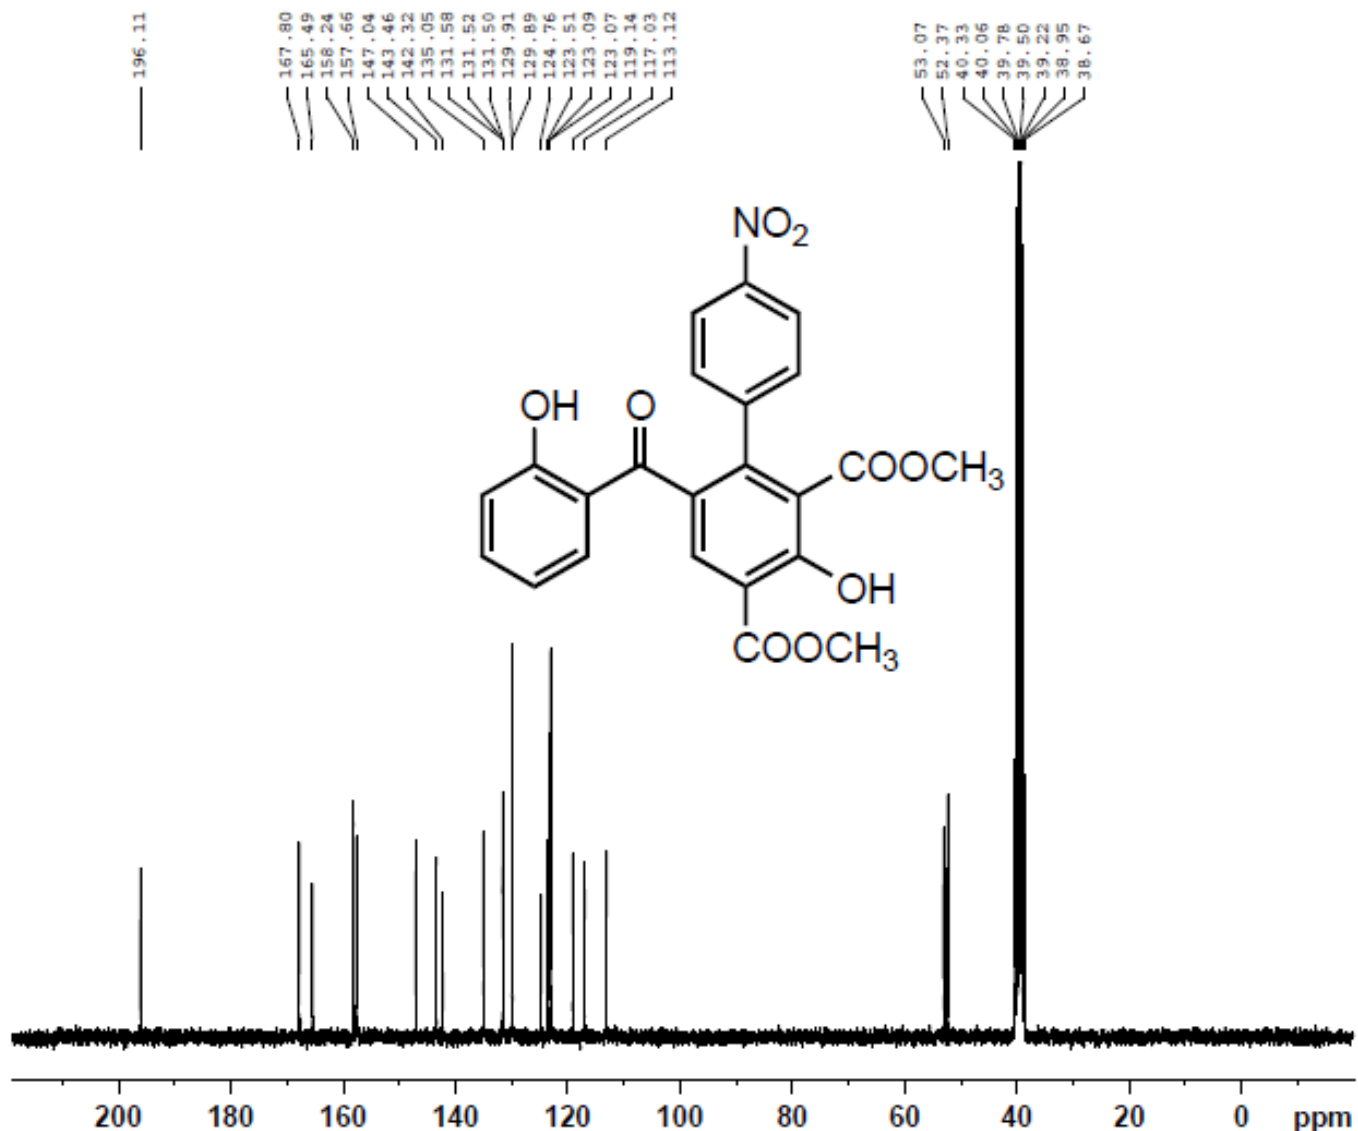

Current Data Parameters  
 NAME 120320.u303 IS-199  
 EXPNO 11  
 PROCNO 1

F2 - Acquisition Parameters  
 Date\_ 20120320  
 Time 22.41  
 INSTRUM spect  
 PROBHD 5 mm PABBO BB-  
 PULPROG zgpg30  
 TD 65536  
 SOLVENT DMSO  
 NS 1024  
 DS 4  
 SWH 18028.846 Hz  
 FIDRES 0.275098 Hz  
 AQ 1.8175818 sec  
 RG 2050  
 DW 27.733 usec  
 DE 10.00 usec  
 TE 298.3 K  
 D1 2.00000000 sec  
 D11 0.03000000 sec  
 TD0 1

==== CHANNEL f1 =====  
 NUC1 13C  
 P1 10.00 usec  
 PL1 -0.50 dB  
 PL1W 33.25691986 W  
 SFO1 75.4752953 MHz

==== CHANNEL f2 =====  
 CPDPRG2 waltz16  
 NUC2 1H  
 PCPD2 72.00 usec  
 PL2 0.00 dB  
 PL12 17.00 dB  
 PL13 17.00 dB  
 PL2W 11.25325108 W  
 PL12W 0.22453187 W  
 PL13W 0.22453187 W  
 SFO2 300.1312005 MHz

F2 - Processing parameters  
 SI 32768  
 SF 75.4677870 MHz  
 WDW EM  
 SSB 0  
 LB 1.00 Hz  
 GB 0  
 PC 1.40

Savych IS-219 1H DMSO

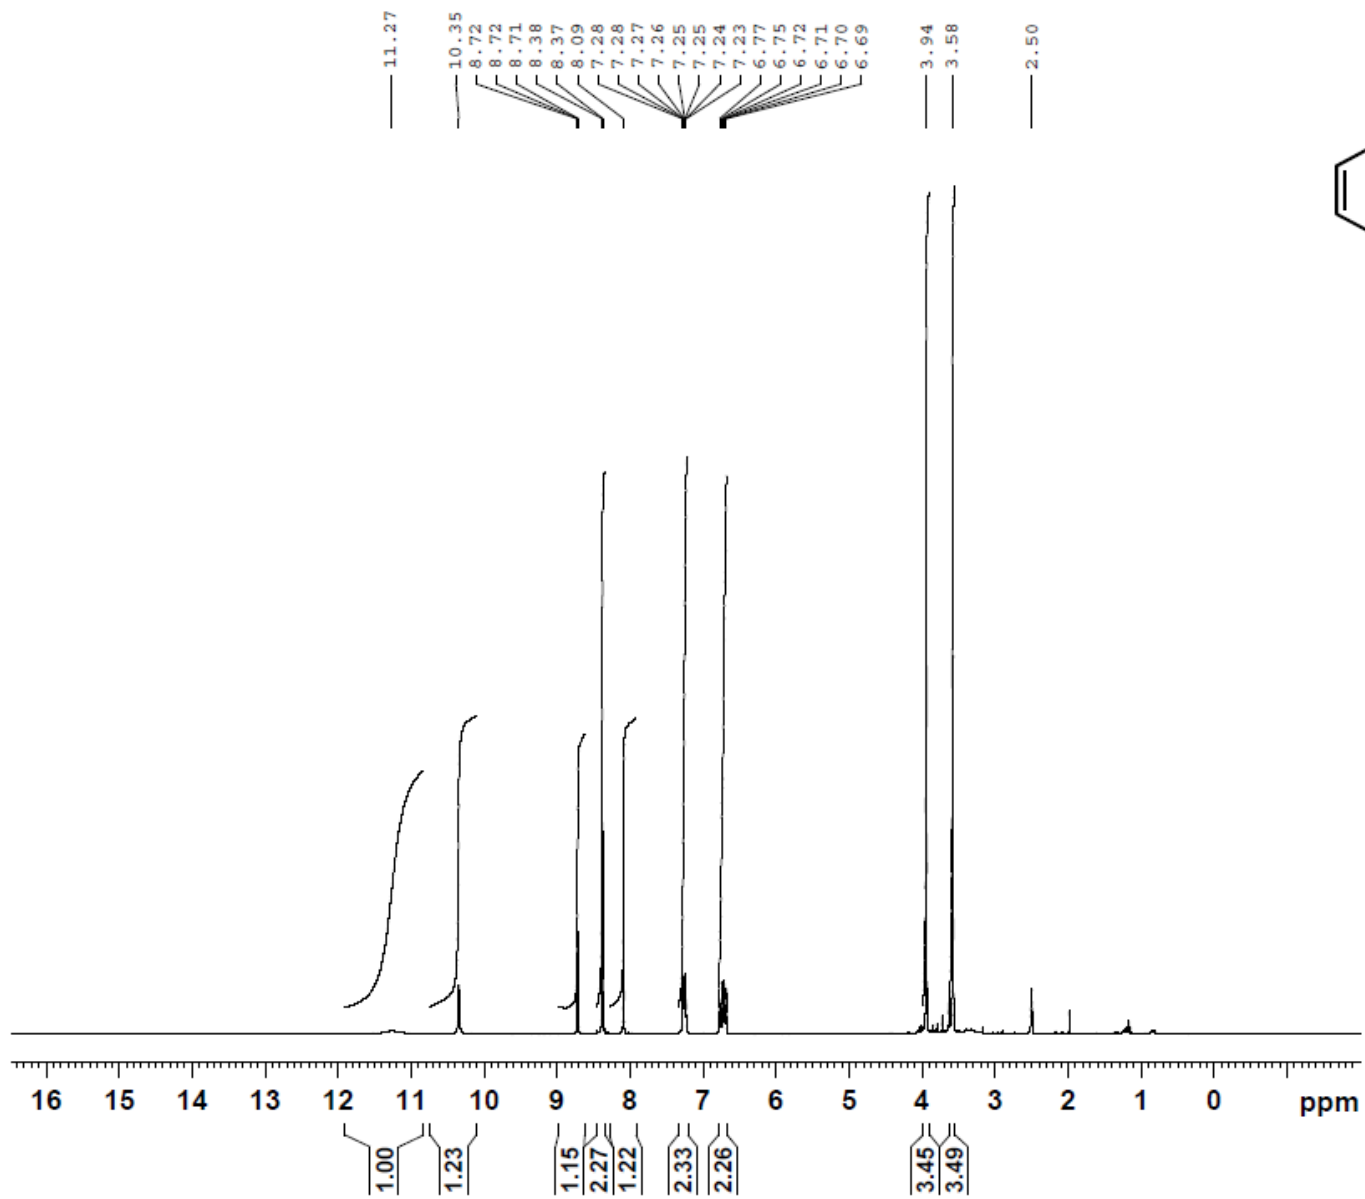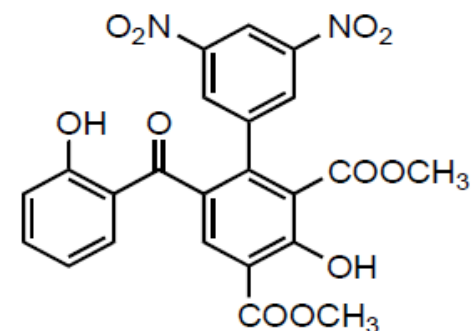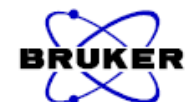

Current Data Parameters  
 NAME 120227.u323 IS-219  
 EXPNO 10  
 PROCNO 1

F2 - Acquisition Parameters  
 Date\_ 20120227  
 Time 12.46  
 INSTRUM spect  
 PROBHD 5 mm PABBO BB-  
 PULPROG zg30  
 TD 65536  
 SOLVENT DMSO  
 NS 16  
 DS 2  
 SWH 6188.119 Hz  
 FIDRES 0.094423 Hz  
 AQ 5.2953587 sec  
 RG 50.8  
 DW 80.800 usec  
 DE 10.00 usec  
 TE 298.2 K  
 D1 1.00000000 sec  
 TD0 1

===== CHANNEL f1 =====  
 NUC1 1H  
 P1 10.00 usec  
 PL1 0.00 dB  
 PL1W 11.25325108 W  
 SFO1 300.1318534 MHz

F2 - Processing parameters  
 SI 32768  
 SF 300.1300067 MHz  
 WDW EM  
 SSB 0  
 LB 0.30 Hz  
 GB 0  
 PC 1.00

Savych IS-219 13C DMSO

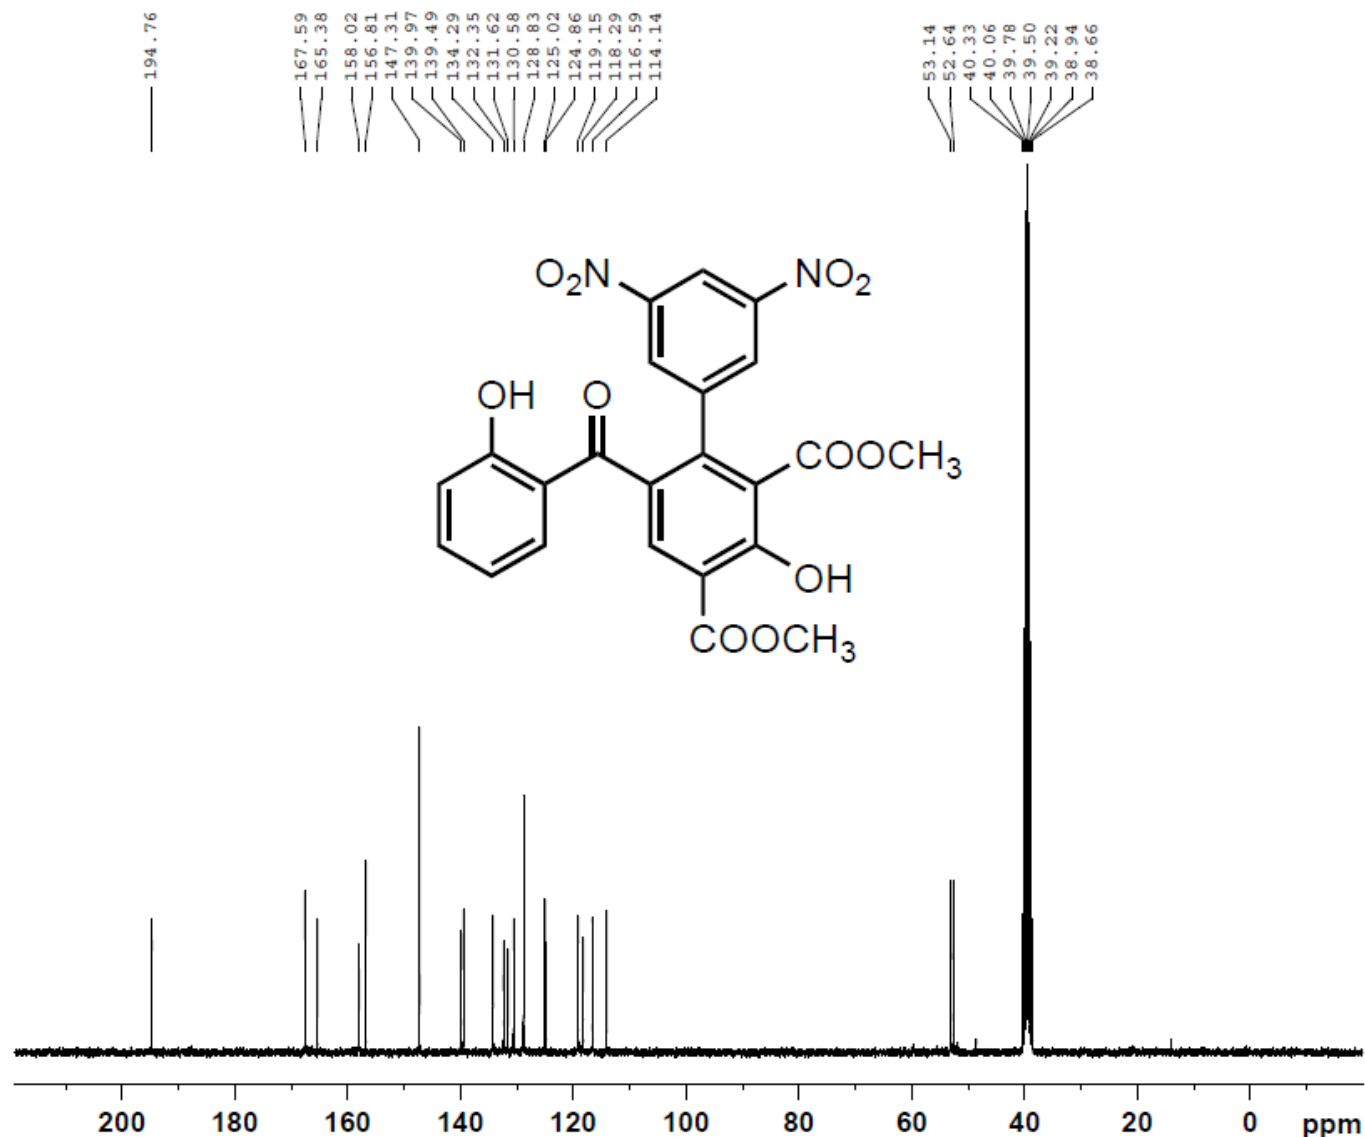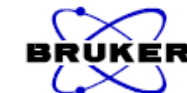

Current Data Parameters  
NAME 120227.u323 IS219  
EXPNO 12  
PROCNO 1

F2 - Acquisition Parameters  
Date\_ 20120228  
Time 4.16  
INSTRUM spect  
PROBHD 5 mm PABBO BB-  
PULPROG zgpg30  
TD 65536  
SOLVENT DMSO  
NS 1024  
DS 4  
SWH 18028.846 Hz  
FIDRES 0.275098 Hz  
AQ 1.8175818 sec  
RG 2050  
DW 27.733 usec  
DE 10.00 usec  
TE 298.2 K  
D1 2.00000000 sec  
D11 0.03000000 sec  
TD0 1

===== CHANNEL f1 =====  
NUC1 13C  
P1 10.00 usec  
PL1 -0.50 dB  
PL1W 33.25691986 W  
SFO1 75.4752953 MHz

===== CHANNEL f2 =====  
CPDPRG2 waltz16  
NUC2 1H  
PCPD2 72.00 usec  
PL2 0.00 dB  
PL12 17.00 dB  
PL13 17.00 dB  
PL2W 11.25325108 W  
PL12W 0.22453187 W  
PL13W 0.22453187 W  
SFO2 300.1312005 MHz

F2 - Processing parameters  
SI 32768  
SF 75.4677854 MHz  
WDW EM  
SSB 0  
LB 1.00 Hz  
GB 0  
PC 1.40

Savych IS-200.1 1H DMSO

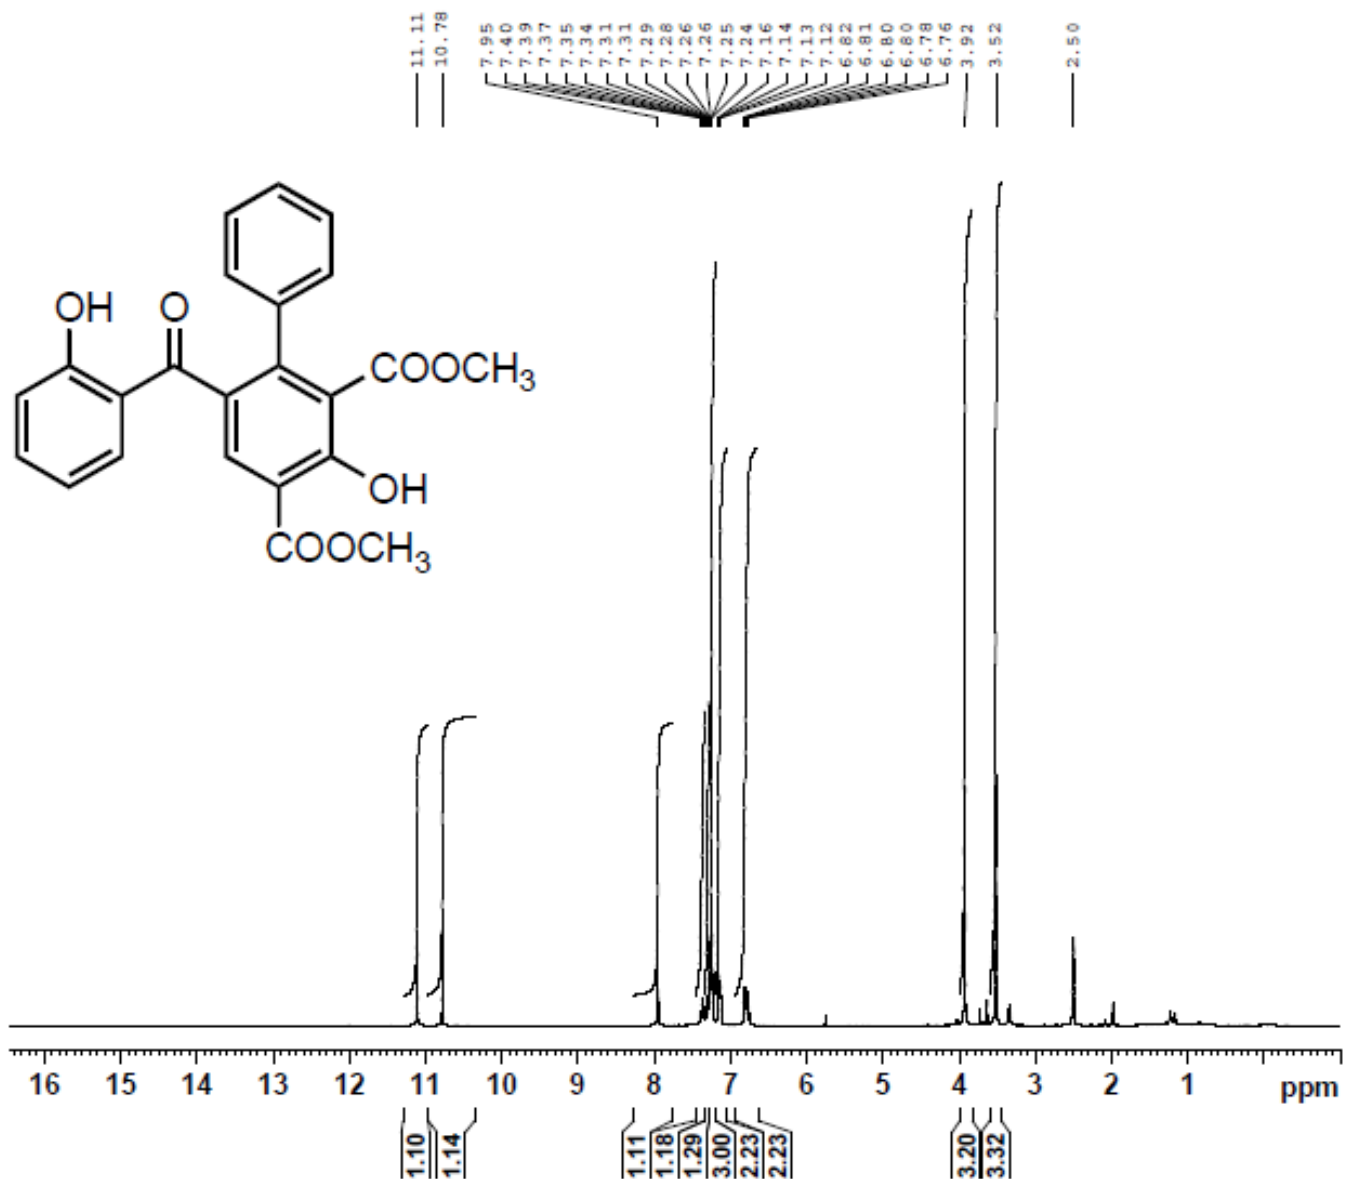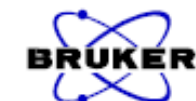

Current Data Parameters  
NAME 120424.u307 IS-200.1  
EXPNO 10  
PROCNO 1

F2 - Acquisition Parameters  
Date\_ 20120424  
Time 8.30  
INSTRUM spect  
PROBHD 5 mm PABBO BB-  
PULPROG zg30  
TD 65536  
SOLVENT DMSO  
NS 16  
DS 2  
SWH 6188.119 Hz  
FIDRES 0.094423 Hz  
AQ 5.2953587 sec  
RG 50.8  
DW 80.800 usec  
DE 10.00 usec  
TE 298.2 K  
D1 1.00000000 sec  
TD0 1

==== CHANNEL f1 =====  
NUC1 1H  
P1 10.00 usec  
PL1 0.00 dB  
PL1W 11.25325108 W  
SFO1 300.1318534 MHz

F2 - Processing parameters  
SI 32768  
SF 300.1300088 MHz  
WDW EM  
SSB 0  
LB 0.30 Hz  
GB 0  
PC 1.00



Savych IS-200.1 13C DMSO

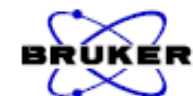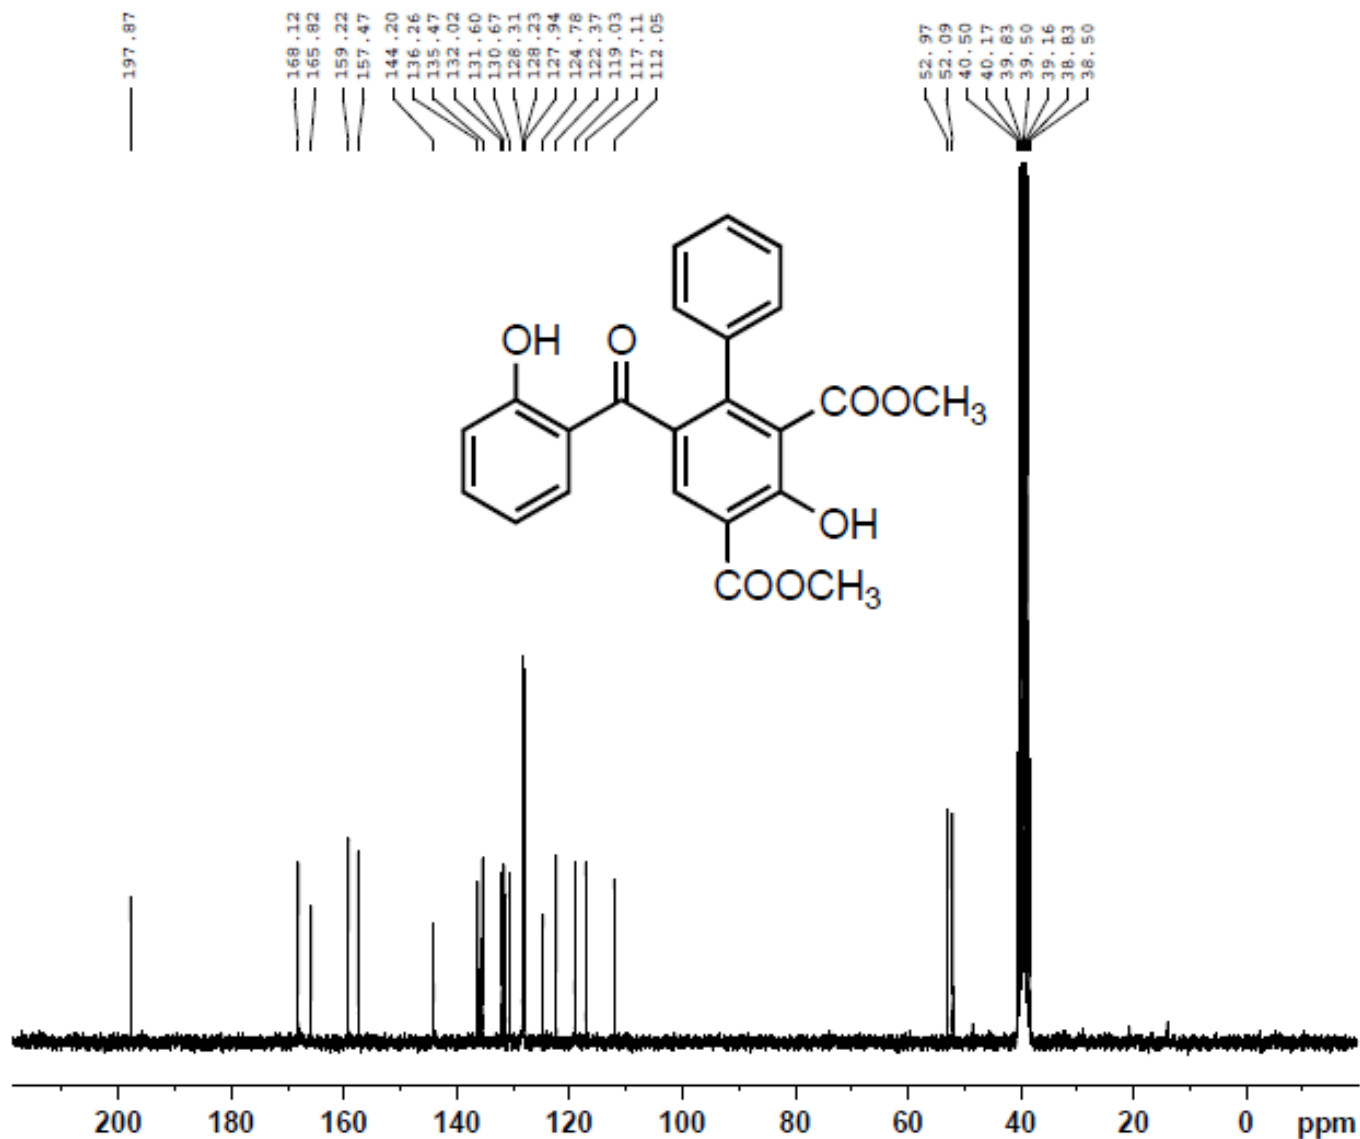

Current Data Parameters  
NAME 120424.211  
EXPNO 10  
PROCNO 1

F2 - Acquisition Parameters  
Date\_ 20120425  
Time\_ 6.38  
INSTRUM spect  
PROBHD 5 mm PABBO BB-  
PULPROG zgpg30  
TD 65536  
SOLVENT DMSO  
NS 1024  
DS 4  
SWH 15000.000 Hz  
FIDRES 0.228882 Hz  
AQ 2.1845834 sec  
RG 2050  
DW 33.333 usec  
DE 10.00 usec  
TE 299.7 K  
D1 2.00000000 sec  
d11 0.03000000 sec  
DELTA 1.89999998 sec  
TD0 1

===== CHANNEL f1 =====  
NUC1 13C  
P1 10.00 usec  
PL1 -1.00 dB  
SFO1 62.9015280 MHz

===== CHANNEL f2 =====  
CPDPRG2 waltz16  
NUC2 1H  
PCPD2 70.00 usec  
PL12 15.00 dB  
PL13 15.00 dB  
PL2 -2.50 dB  
SFO2 250.1310005 MHz

F2 - Processing parameters  
SI 32768  
SF 62.8952697 MHz  
WDW EM  
SSB 0  
LB 1.00 Hz  
GB 0  
PC 1.40

Savych IS-173.1 1H CDC13

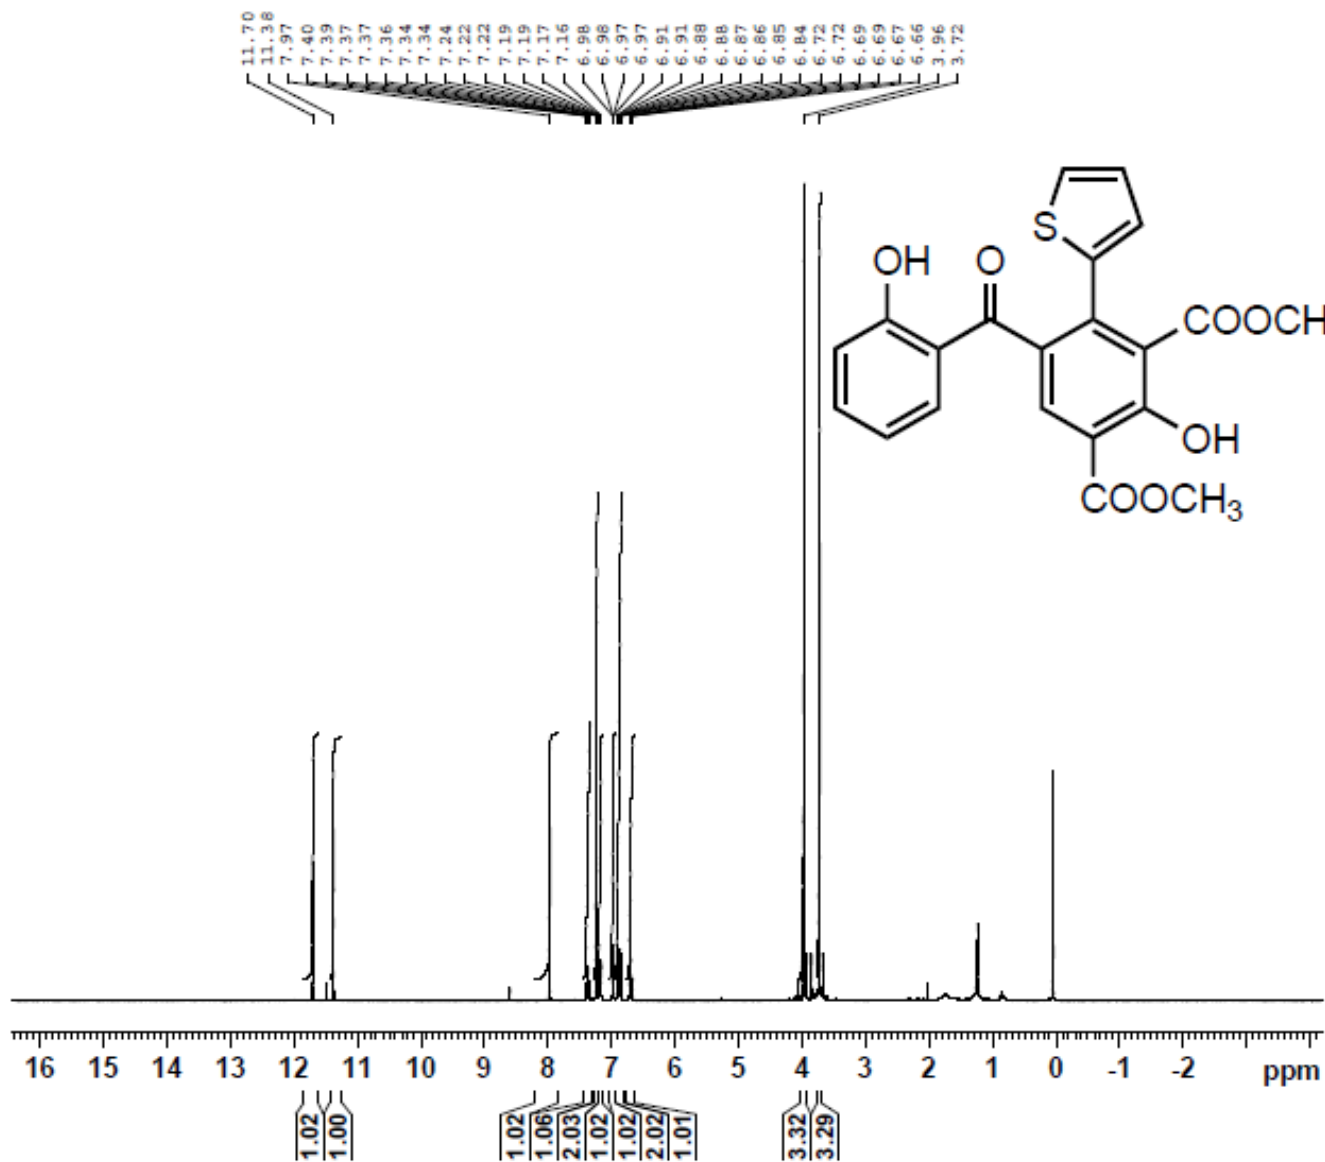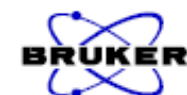

Current Data Parameters  
NAME 120607.u306 IS-173.1  
EXPNO 10  
PROCNO 1

F2 - Acquisition Parameters  
Date\_ 20120607  
Time 8.59  
INSTRUM spect  
PROBHD 5 mm PABBO BB-  
PULPROG zg30  
TD 65536  
SOLVENT CDC13  
NS 16  
DS 2  
SWH 6188.119 Hz  
FIDRES 0.094423 Hz  
AQ 5.2953587 sec  
RG 256  
DW 80.800 usec  
DE 10.00 usec  
TE 297.5 K  
D1 1.00000000 sec  
TD0 1

==== CHANNEL f1 =====  
NUC1 1H  
P1 10.00 usec  
PL1 0.00 dB  
PL1W 11.25325108 W  
SFO1 300.1318534 MHz

F2 - Processing parameters  
SI 32768  
SF 300.1300148 MHz  
WDW EM  
SSB 0  
LB 0.30 Hz  
GB 0  
PC 1.00

Savych IS-173.1 13C CDC13

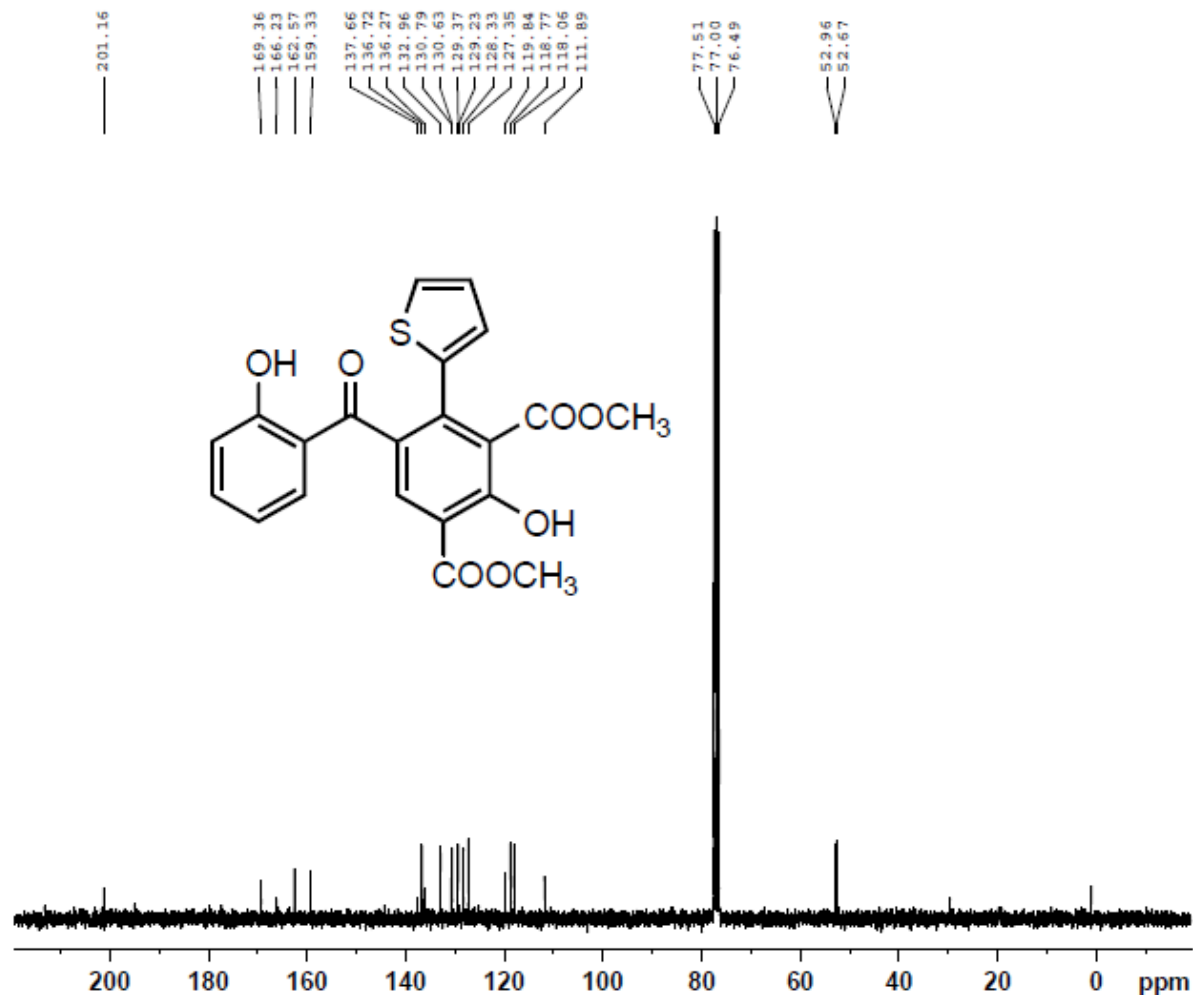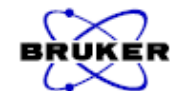

Current Data Parameters  
NAME 120608.202  
EXPNO 10  
PROCNO 1

F2 - Acquisition Parameters  
Date\_ 20120608  
Time 13.02  
INSTRUM spect  
PROBHD 5 mm PABBO BB-  
PULPROG zgpg30  
TD 65536  
SOLVENT CDC13  
NS 1024  
DS 4  
SWH 15000.000 Hz  
FIDRES 0.228882 Hz  
AQ 2.1845834 sec  
RG 2050  
DW 33.333 usec  
DE 10.00 usec  
TE 299.5 K  
D1 2.00000000 sec  
d11 0.03000000 sec  
DELTA 1.89999998 sec  
TD0 1

===== CHANNEL f1 =====  
NUC1 13C  
P1 10.00 usec  
PL1 -1.00 dB  
SFO1 62.9015280 MHz

===== CHANNEL f2 =====  
CPDPRG2 waltz16  
NUC2 1H  
PCPD2 70.00 usec  
PL12 15.00 dB  
PL13 15.00 dB  
PL2 -2.50 dB  
SFO2 250.1310005 MHz

F2 - Processing parameters  
SI 32768  
SF 62.8952383 MHz  
WDW EM  
SSB 0  
LB 1.00 Hz  
GB 0  
PC 1.40

Savych IS-93.1 1H CDC13

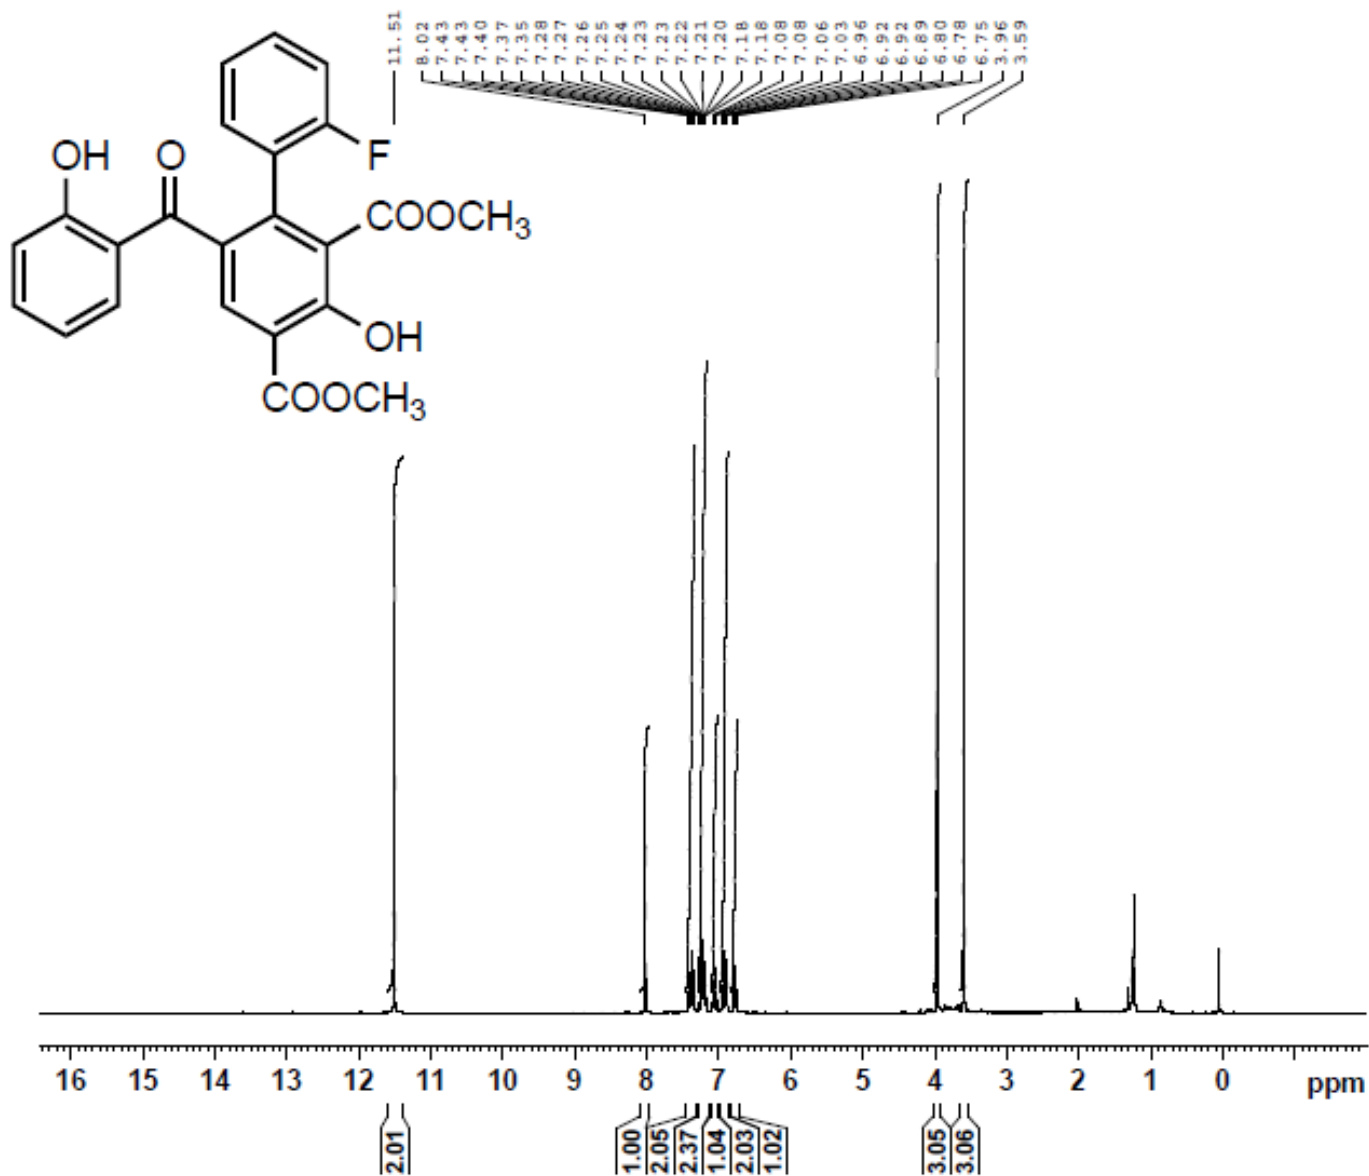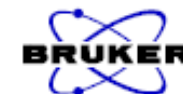

Current Data Parameters  
NAME 120802.u303 IS-93.1  
EXPNO 10  
PROCNO 1

F2 - Acquisition Parameters  
Date\_ 20120802  
Time 8.57  
INSTRUM spect  
PROBHD 5 mm PABBO BB-  
PULPROG zg30  
TD 65536  
SOLVENT CDCl3  
NS 16  
DS 2  
SWH 6188.119 Hz  
FIDRES 0.094423 Hz  
AQ 5.2953587 sec  
RG 101  
DW 80.800 usec  
DE 10.00 usec  
TE 300.0 K  
D1 1.0000000 sec  
TD0 1

==== CHANNEL f1 =====  
NUC1 1H  
P1 10.00 usec  
PL1 0.00 dB  
PL1W 11.25325108 W  
SFO1 300.1318534 MHz

F2 - Processing parameters  
SI 32768  
SF 300.1300156 MHz  
WDW EM  
SSB 0  
LB 0.30 Hz  
GB 0  
PC 1.00

Savych IS-93.1 13C CDC13

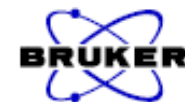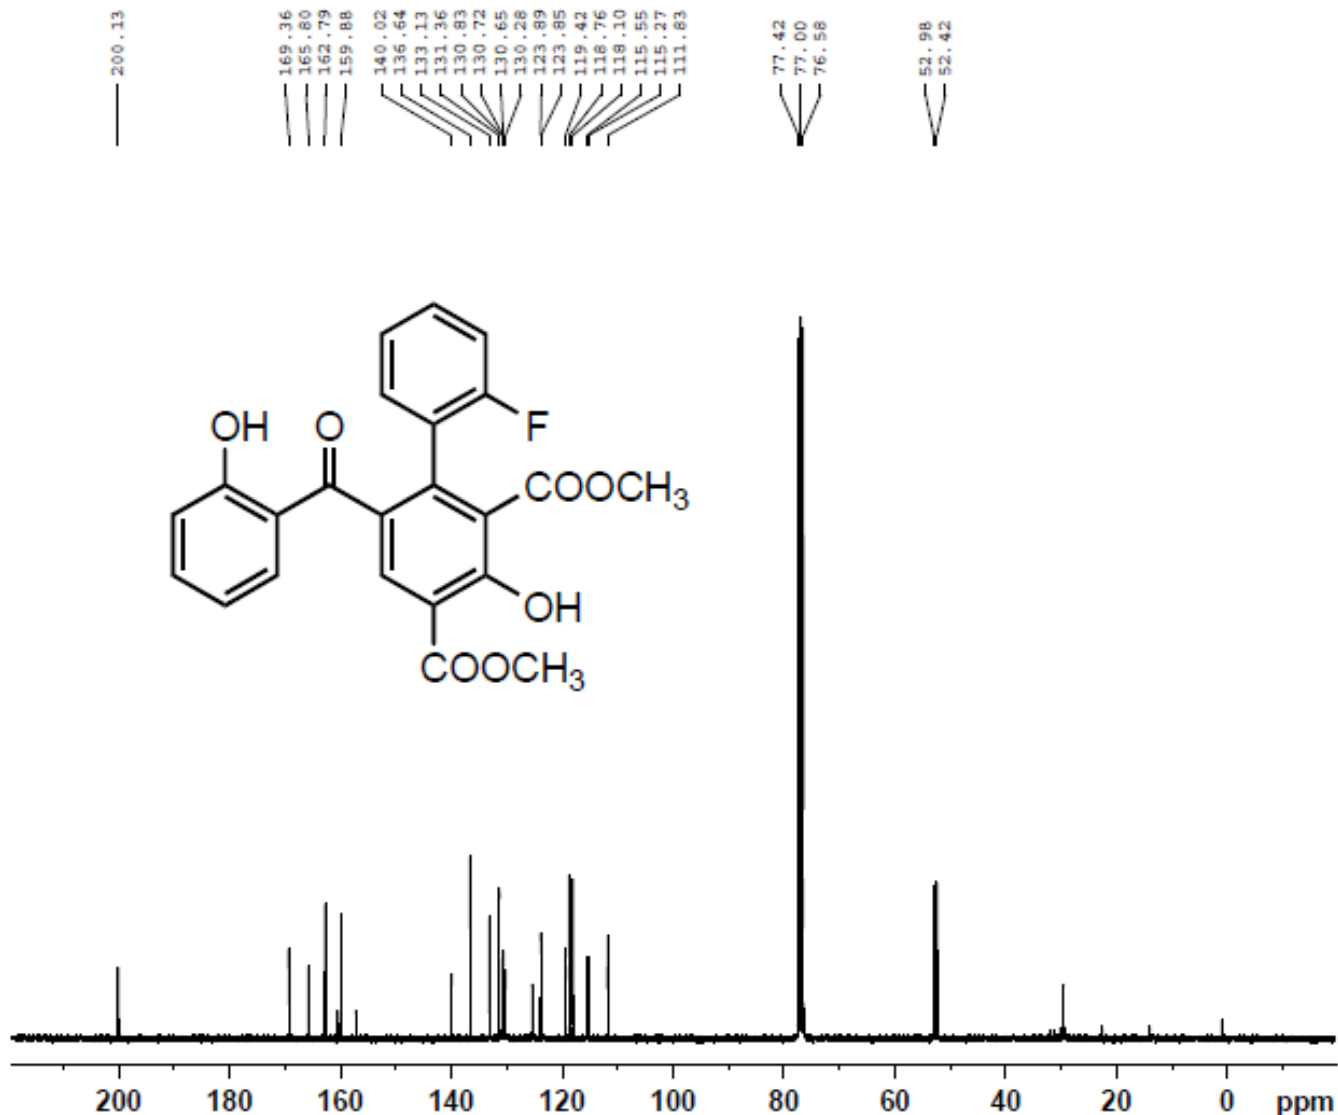

Current Data Parameters  
 NAME 120802.u303 IS-93.1  
 EXPNO 13  
 PROCNO 1

F2 - Acquisition Parameters  
 Date\_ 20120803  
 Time 1.10  
 INSTRUM spect  
 PROBHD 5 mm PABBO BB-  
 PULPROG zgpg30  
 TD 65536  
 SOLVENT CDC13  
 NS 1400  
 DS 4  
 SWH 18028.846 Hz  
 FIDRES 0.275098 Hz  
 AQ 1.8175818 sec  
 RG 2050  
 DW 27.733 usec  
 DE 10.00 usec  
 TE 300.0 K  
 D1 2.0000000 sec  
 D11 0.0300000 sec  
 TD0 1

==== CHANNEL f1 =====  
 NUC1 13C  
 P1 10.00 usec  
 PL1 -0.50 dB  
 PL1W 33.25691986 W  
 SFO1 75.4752953 MHz

==== CHANNEL f2 =====  
 CPDPRG2 waltz16  
 NUC2 1H  
 PCPD2 72.00 usec  
 PL2 0.00 dB  
 PL12 17.00 dB  
 PL13 17.00 dB  
 PL2W 11.25325108 W  
 PL12W 0.22453187 W  
 PL13W 0.22453187 W  
 SFO2 300.1312005 MHz

F2 - Processing parameters  
 SI 32768  
 SF 75.4677531 MHz  
 WDW EM  
 SSB 0  
 LB 1.00 Hz  
 GB 0  
 PC 1.40

Savych IS-93.1 19F CDC13

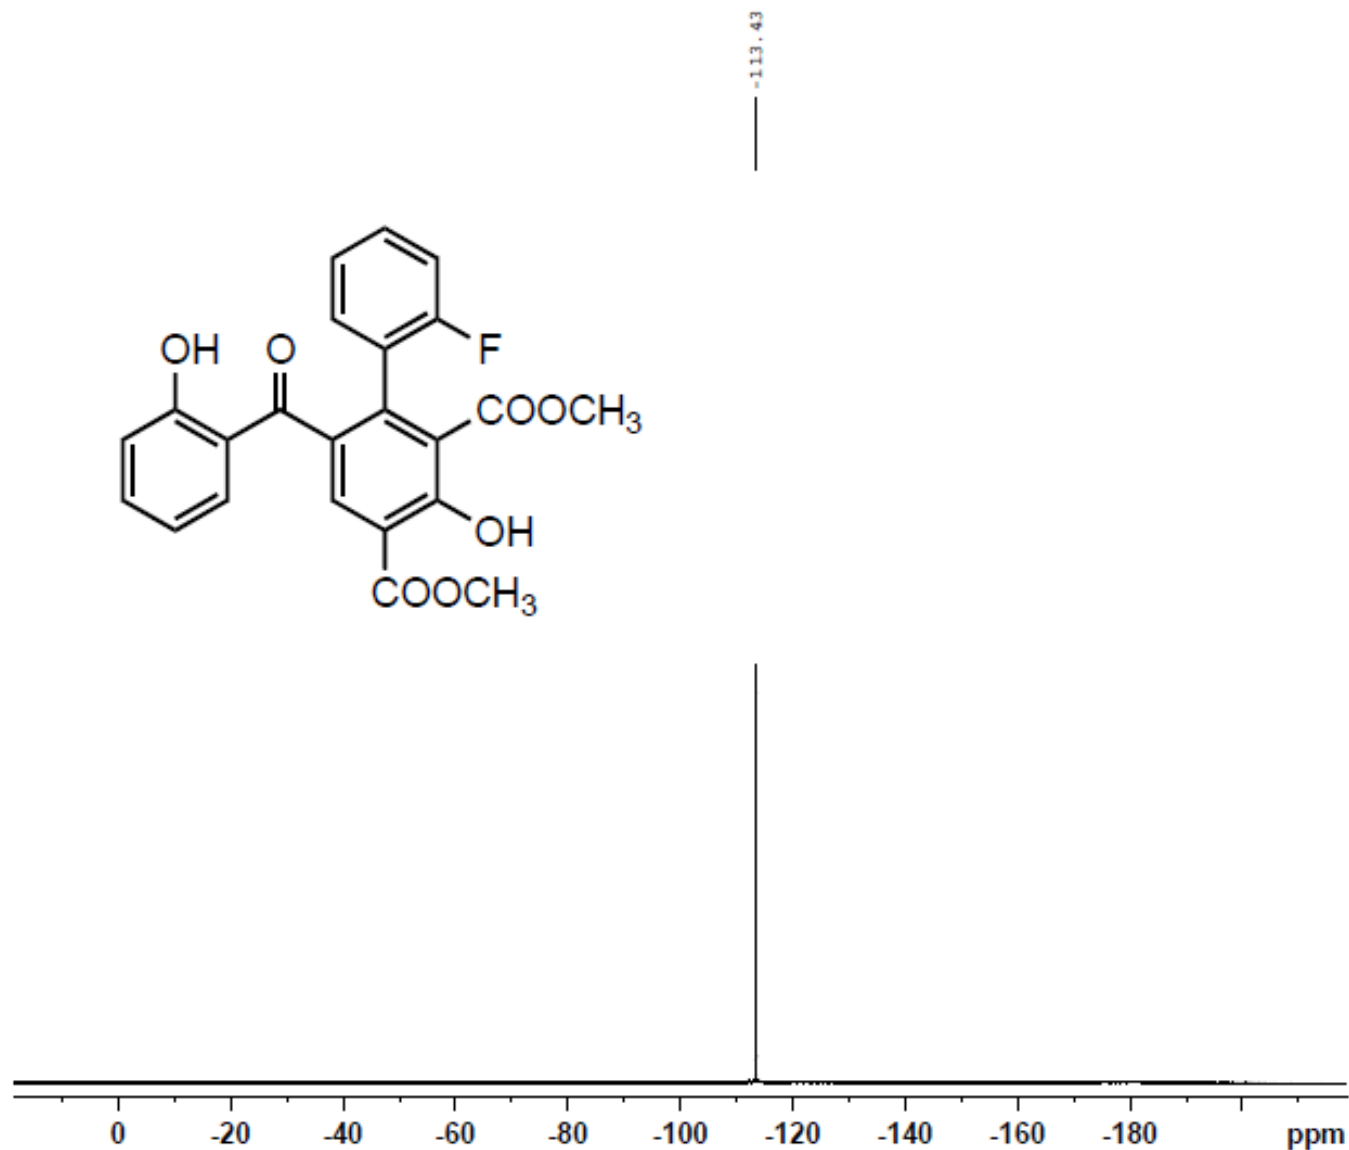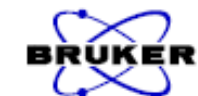

Current Data Parameters  
NAME 120802.u303 IS-93.1  
EXPNO 11  
PROCNO 1

F2 - Acquisition Parameters  
Date\_ 20120802  
Time 9.02  
INSTRUM spect  
PROBHD 5 mm PABBO BB-  
PULPROG zgpg30  
TD 131072  
SOLVENT CDC13  
NS 80  
DS 4  
SWH 66964.289 Hz  
FIDRES 0.510897 Hz  
AQ 0.9787210 sec  
RG 2050  
DW 7.467 usec  
DE 10.00 usec  
TE 300.0 K  
D1 1.00000000 sec  
D11 0.03000000 sec  
D12 0.00002000 sec  
TD0 1

===== CHANNEL f1 =====  
NUC1 19F  
P1 10.00 usec  
PL1 -3.00 dB  
PL1W 15.53680420 W  
SFO1 282.3761148 MHz

===== CHANNEL f2 =====  
CPDPRG2 waltz16  
NUC2 1H  
PCPD2 72.00 usec  
PL2 0.00 dB  
PL12 17.00 dB  
PL2W 11.25325108 W  
PL12W 0.22453187 W  
SFO2 300.1312005 MHz

F2 - Processing parameters  
SI 65536  
SF 282.4043550 MHz  
WDW EM  
SSB 0  
LB 0.30 Hz  
GB 0  
PC 1.00

Savych, IS-133.1, DMSO, 1H

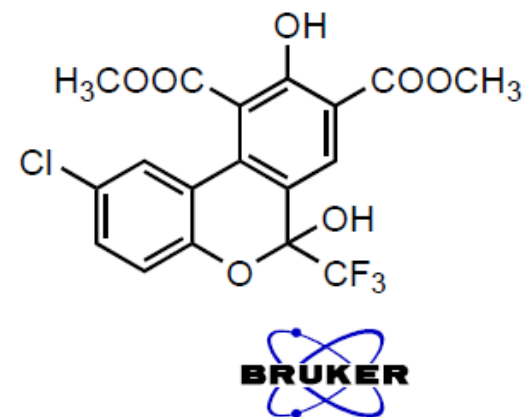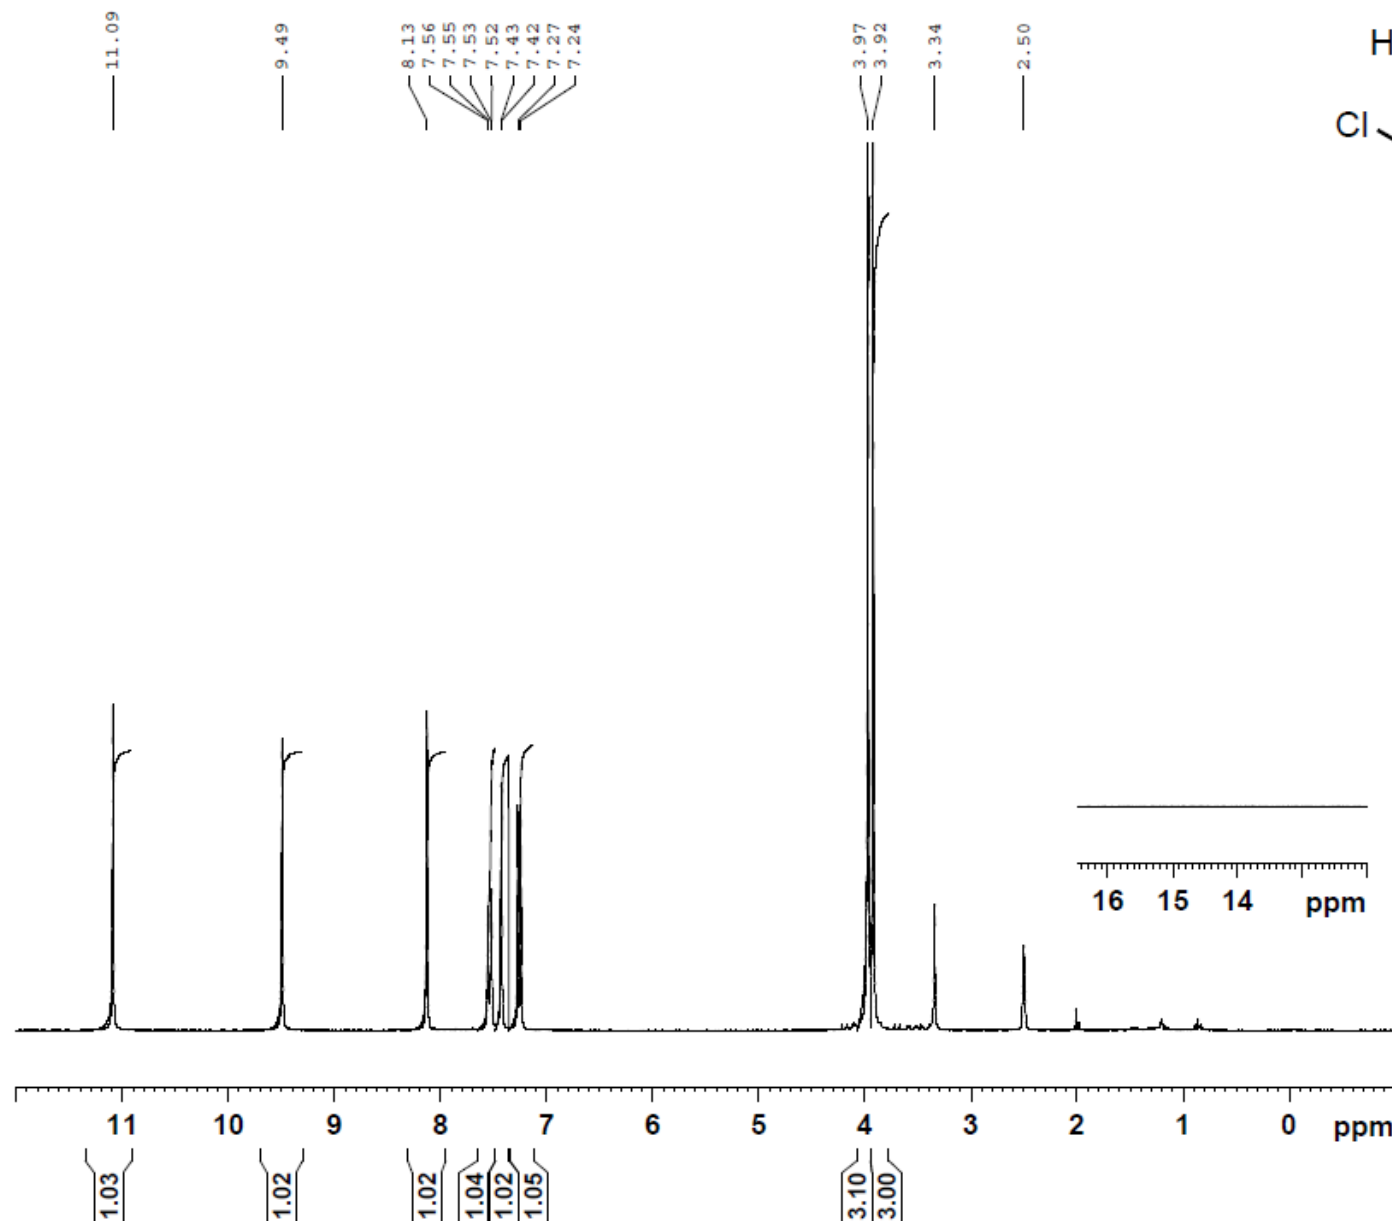

Current Data Parameters  
NAME 110627.u313 IS-133.1  
EXPNO 10  
PROCNO 1

F2 - Acquisition Parameters  
Date\_ 20110627  
Time 11.38  
INSTRUM spect  
PROBHD 5 mm PABBO BB-  
PULPROG zg30  
TD 65536  
SOLVENT DMSO  
NS 16  
DS 2  
SWH 6188.119 Hz  
FIDRES 0.094423 Hz  
AQ 5.2953587 sec  
RG 114  
DW 80.800 usec  
DE 10.00 usec  
TE 298.2 K  
D1 1.00000000 sec  
TD0 1

===== CHANNEL f1 =====  
NUC1 1H  
P1 10.00 usec  
PL1 0.00 dB  
PL1W 11.25325108 W  
SFO1 300.1318534 MHz

F2 - Processing parameters  
SI 32768  
SF 300.1300085 MHz  
WDW EM  
SSB 0  
LB 0.30 Hz  
GB 0  
PC 1.00

Savych IS-133.1 13C DMSO

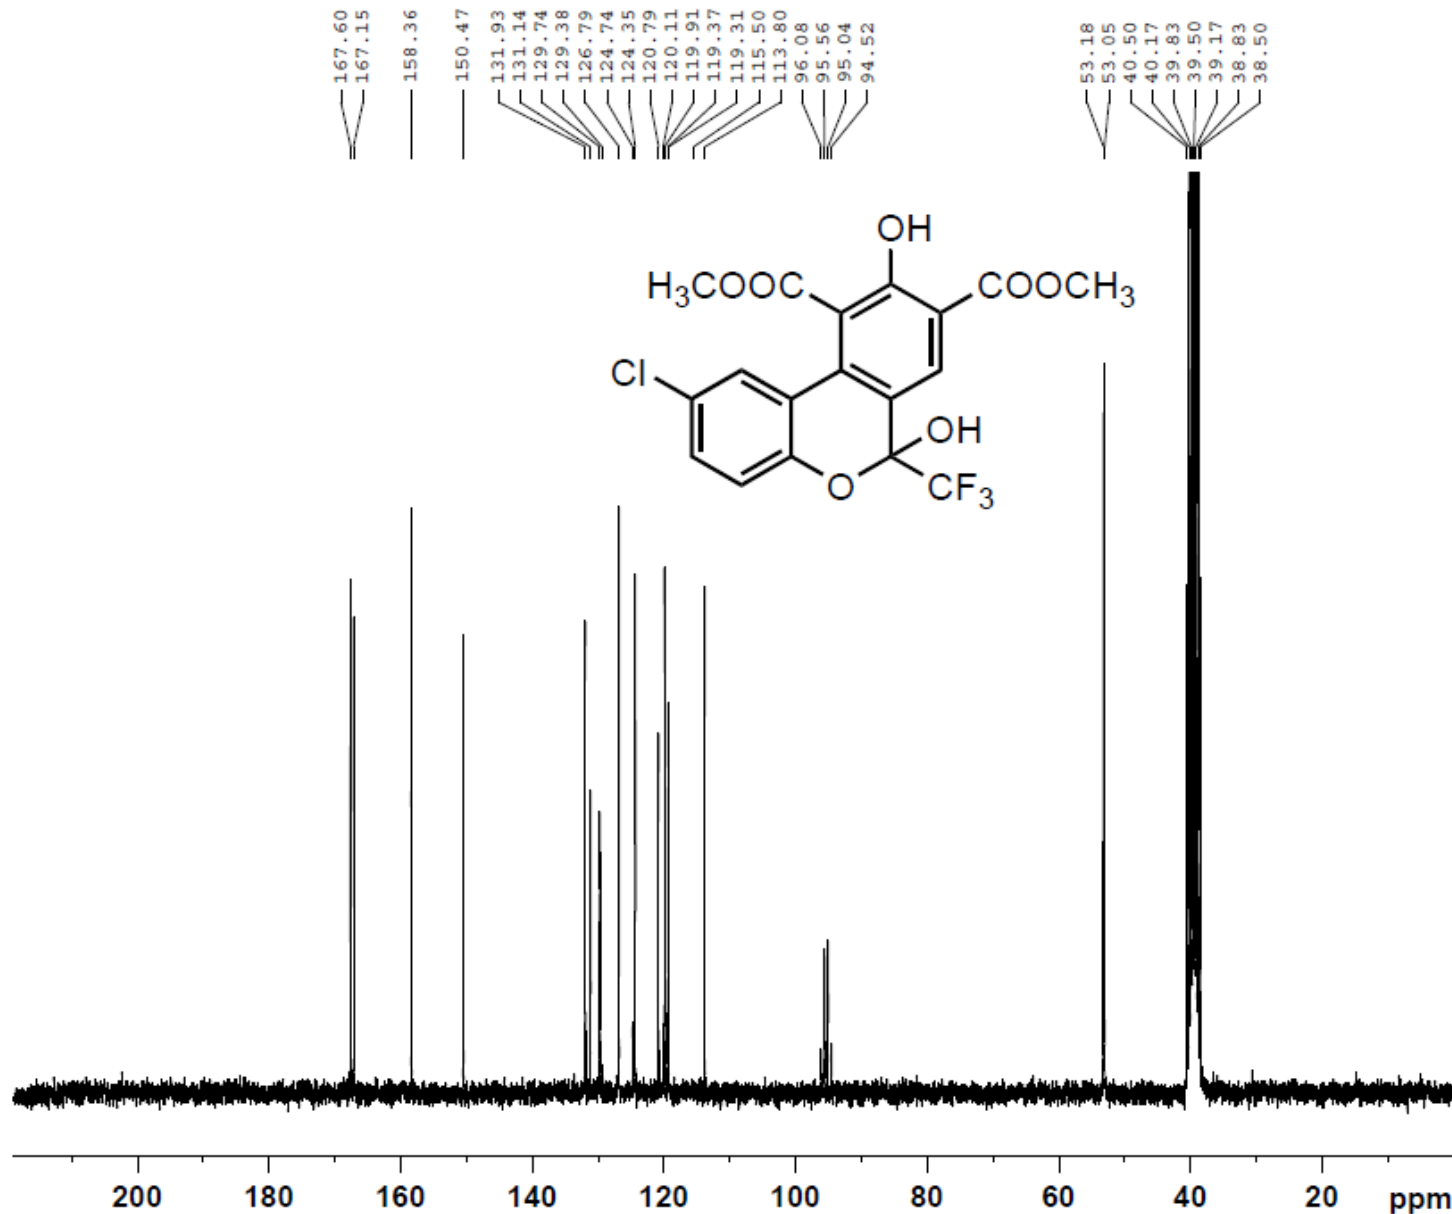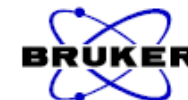

Current Data Parameters  
NAME 110929.207 IS-133.1  
EXPNO 11  
PROCNO 1

F2 - Acquisition Parameters  
Date\_ 20110929  
Time 17.37  
INSTRUM spect  
PROBHD 5 mm PABBO BB-  
PULPROG zgpg30  
TD 65536  
SOLVENT DMSO  
NS 2048  
DS 4  
SWH 15000.000 Hz  
FIDRES 0.228882 Hz  
AQ 2.1845834 sec  
RG 2050  
DW 33.333 usec  
DE 10.00 usec  
TE 299.1 K  
D1 2.00000000 sec  
d11 0.03000000 sec  
DELTA 1.89999998 sec  
TD0 1

===== CHANNEL f1 =====  
NUC1 13C  
P1 10.00 usec  
PL1 -1.00 dB  
SFO1 62.9015280 MHz

===== CHANNEL f2 =====  
CPDPRG2 waltz16  
NUC2 1H  
PCPD2 70.00 usec  
PL12 15.00 dB  
PL13 15.00 dB  
PL2 -2.50 dB  
SFO2 250.1310005 MHz

F2 - Processing parameters  
SI 32768  
SF 62.8952674 MHz  
WDW EM  
SSB 0  
LB 1.00 Hz  
GB 0  
PC 1.40



Savych, IS-133.1, DMSO, 19F

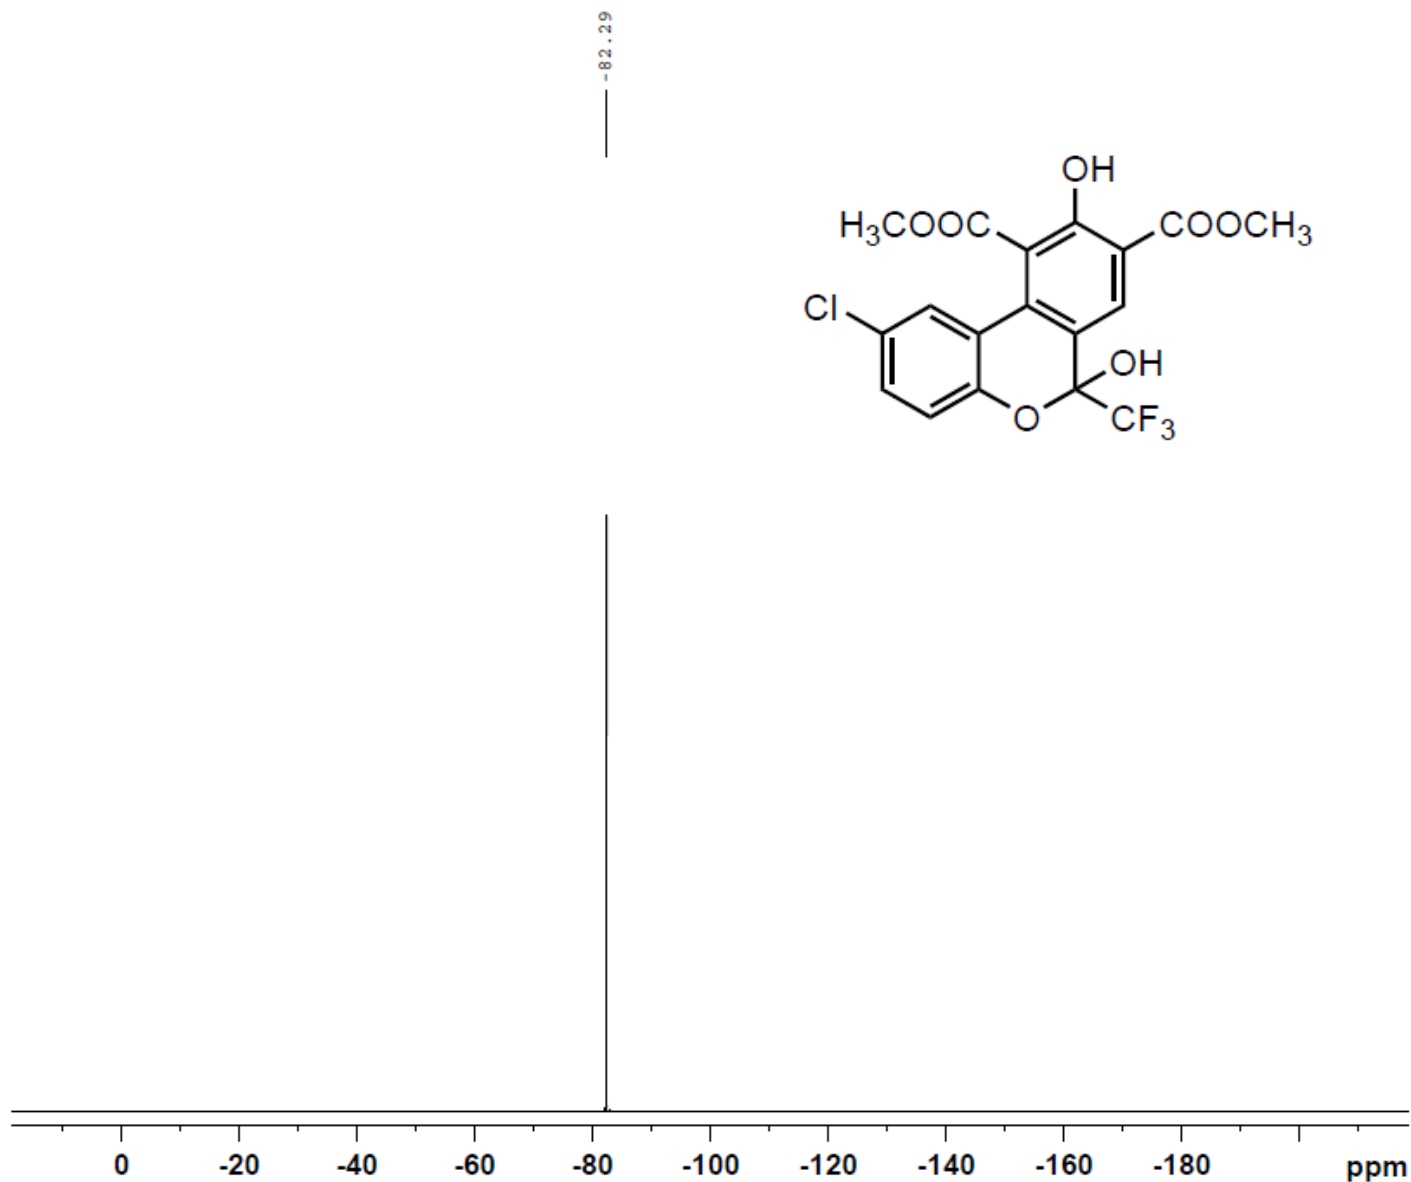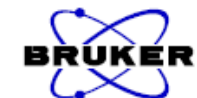

Current Data Parameters  
NAME 110627.u313 IS-133.1  
EXPNO 11  
PROCNO 1

F2 - Acquisition Parameters  
Date\_ 20110627  
Time 11.45  
INSTRUM spect  
PROBHD 5 mm PABBO BB-  
PULPROG zgfhigqn  
TD 131072  
SOLVENT DMSO  
NS 128  
DS 4  
SWH 66964.289 Hz  
FIDRES 0.510897 Hz  
AQ 0.9787210 sec  
RG 2050  
DW 7.467 usec  
DE 10.00 usec  
TE 298.2 K  
D1 1.00000000 sec  
D11 0.03000000 sec  
D12 0.00002000 sec  
TD0 1

===== CHANNEL f1 =====  
NUC1 19F  
P1 10.00 usec  
PL1 -3.00 dB  
PL1W 15.53680420 W  
SFO1 282.3761148 MHz

===== CHANNEL f2 =====  
CPDPRG2 waltz16  
NUC2 1H  
PCPD2 72.00 usec  
PL2 0.00 dB  
PL12 17.00 dB  
PL2W 11.25325108 W  
PL12W 0.22453187 W  
SFO2 300.1312005 MHz

F2 - Processing parameters  
SI 65536  
SF 282.4043550 MHz  
WDW EM  
SSB 0  
LB 0.30 Hz  
GB 0  
PC 1.00

Savych IS-110.12 1H DMSO

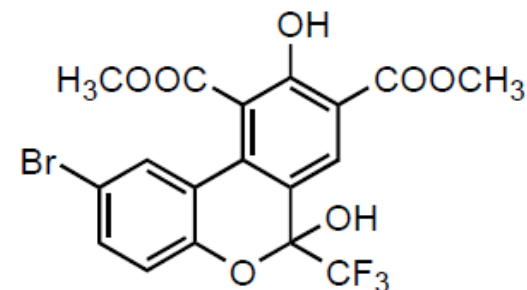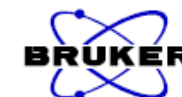

Current Data Parameters  
 NAME 110525.u352 IS-110.12  
 EXPNO 10  
 PROCNO 1

F2 - Acquisition Parameters  
 Date\_ 20110526  
 Time 7.42  
 INSTRUM spect  
 PROBHD 5 mm PABBO BB-  
 PULPROG zg30  
 TD 65536  
 SOLVENT DMSO  
 NS 16  
 DS 2  
 SWH 6188.119 Hz  
 FIDRES 0.094423 Hz  
 AQ 5.2953587 sec  
 RG 144  
 DW 80.800 usec  
 DE 10.00 usec  
 TE 298.2 K  
 D1 1.0000000 sec  
 TD0 1

----- CHANNEL f1 -----  
 NUC1 1H  
 P1 10.00 usec  
 PL1 0.00 dB  
 PL1W 11.25325108 W  
 SFO1 300.1318534 MHz

F2 - Processing parameters  
 SI 32768  
 SF 300.1300062 MHz  
 WDW EM  
 SSB 0  
 LB 0.30 Hz  
 GB 0  
 PC 1.00

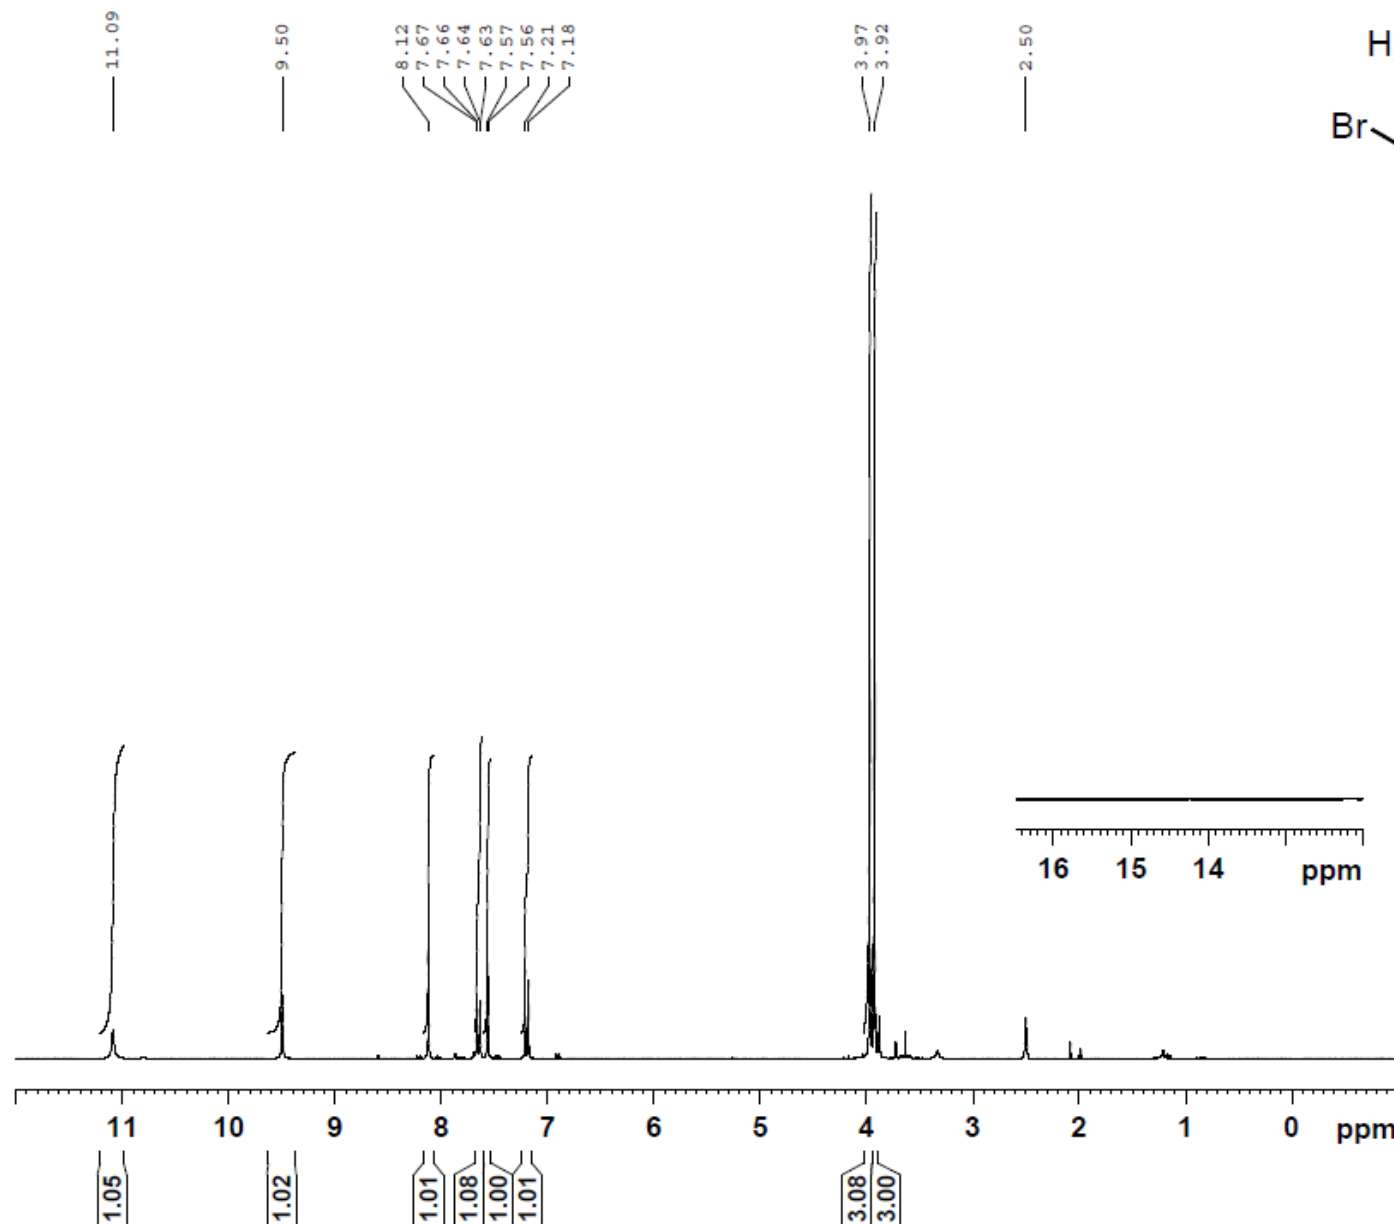

Savych IS-110.12 13C DMSO

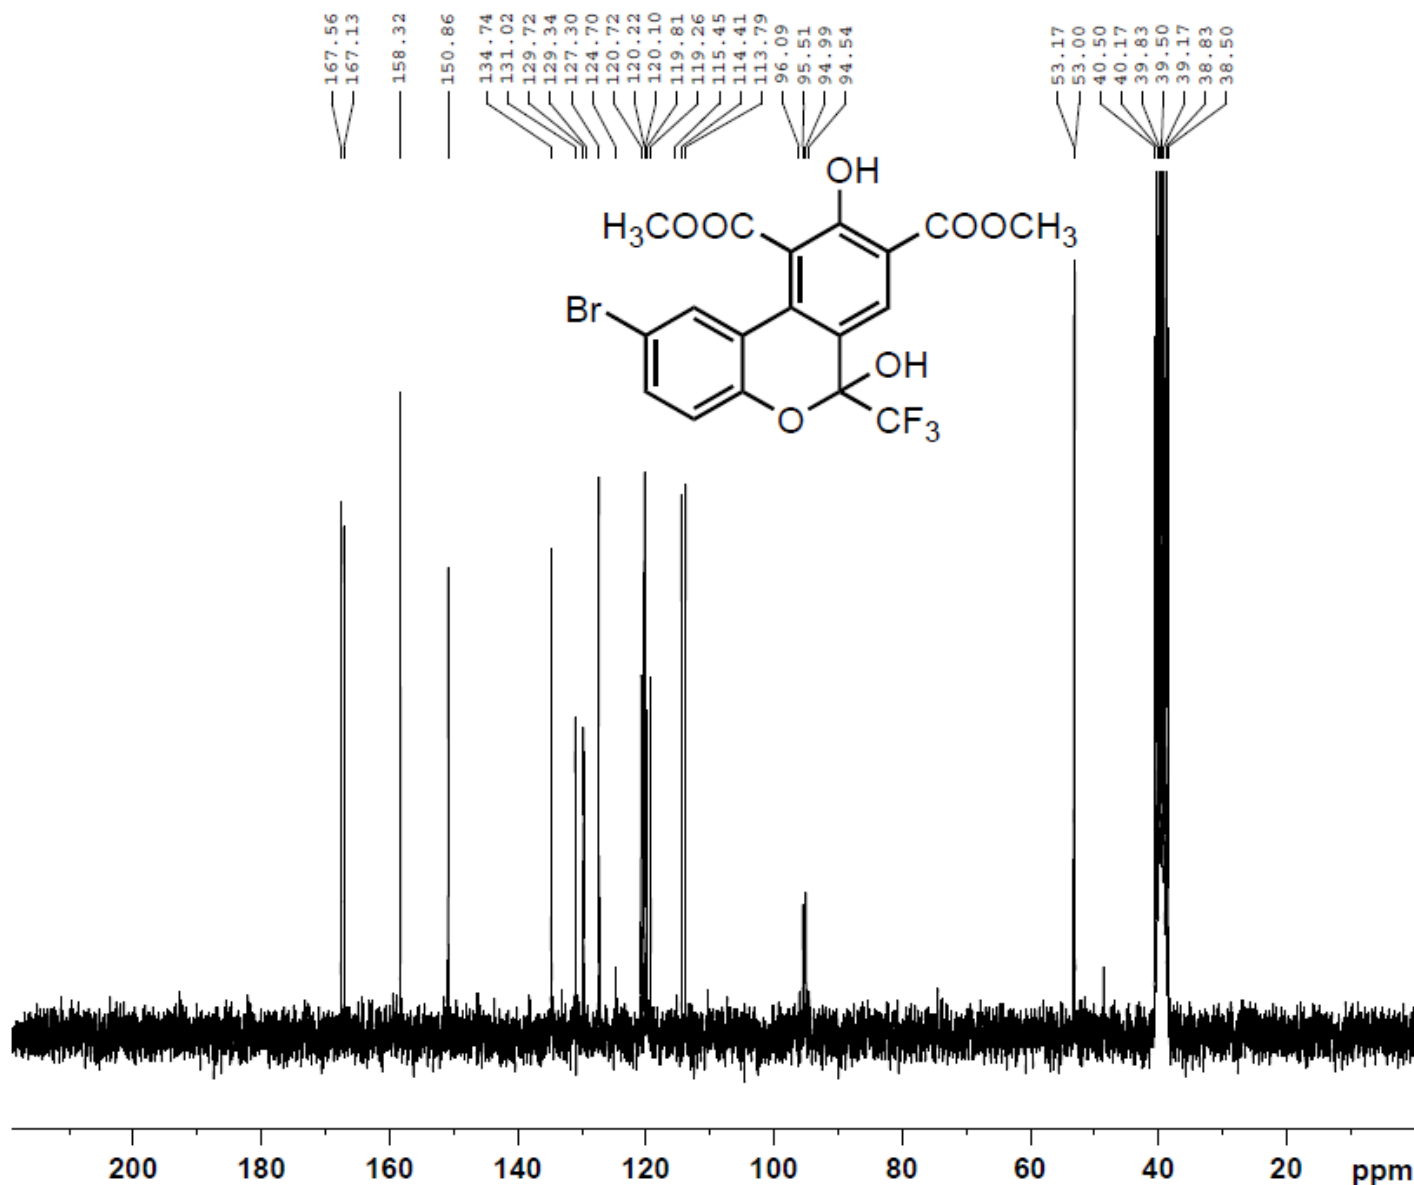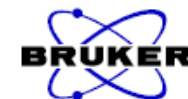

Current Data Parameters  
 NAME 110526.202 IS-110.2 C13  
 EXPNO 10  
 PROCNO 1

F2 - Acquisition Parameters  
 Date\_ 20110526  
 Time 15.01  
 INSTRUM spect  
 PROBHD 5 mm PABBO BB-  
 PULPROG zgpg30  
 TD 65536  
 SOLVENT DMSO  
 NS 1024  
 DS 4  
 SWH 15000.000 Hz  
 FIDRES 0.228882 Hz  
 AQ 2.1845834 sec  
 RG 2050  
 DW 33.333 usec  
 DE 10.00 usec  
 TE 299.4 K  
 D1 2.00000000 sec  
 d11 0.03000000 sec  
 DELTA 1.89999998 sec  
 TD0 1

===== CHANNEL f1 =====  
 NUC1 13C  
 P1 10.00 usec  
 PL1 -1.00 dB  
 SFO1 62.9015280 MHz

===== CHANNEL f2 =====  
 CPDPRG2 waltz16  
 NUC2 1H  
 PCPD2 70.00 usec  
 PL12 15.00 dB  
 PL13 15.00 dB  
 PL2 -2.50 dB  
 SFO2 250.1310005 MHz

F2 - Processing parameters  
 SI 32768  
 SF 62.8952687 MHz  
 WDW EM  
 SSB 0  
 LB 1.00 Hz  
 GB 0  
 PC 1.40

Savych IS-110.12 19F DMSO

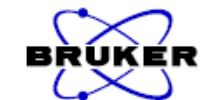

Current Data Parameters  
NAME 110525.u352 IS-110.12  
EXPNO 11  
PROCNO 1

F2 - Acquisition Parameters  
Date\_ 20110526  
Time 7.45  
INSTRUM spect  
PROBHD 5 mm PABBO BB-  
PULPROG zgfhigqn  
TD 131072  
SOLVENT DMSO  
NS 48  
DS 4  
SWH 66964.289 Hz  
FIDRES 0.510897 Hz  
AQ 0.9787210 sec  
RG 2050  
DW 7.467 usec  
DE 10.00 usec  
TE 298.2 K  
D1 1.00000000 sec  
D11 0.03000000 sec  
D12 0.00002000 sec  
TD0 1

=====  
CHANNEL f1  
=====  
NUC1 19F  
P1 10.00 usec  
PL1 -3.00 dB  
PL1W 15.53680420 W  
SFO1 282.3761148 MHz

=====  
CHANNEL f2  
=====  
CPDPRG2 waltz16  
NUC2 1H  
PCPD2 72.00 usec  
PL2 0.00 dB  
PL12 17.00 dB  
PL2W 11.25325108 W  
PL12W 0.22453187 W  
SFO2 300.1312005 MHz

F2 - Processing parameters  
SI 65536  
SF 282.4043550 MHz  
WDW EM  
SSB 0  
LB 0.30 Hz  
GB 0  
PC 1.00

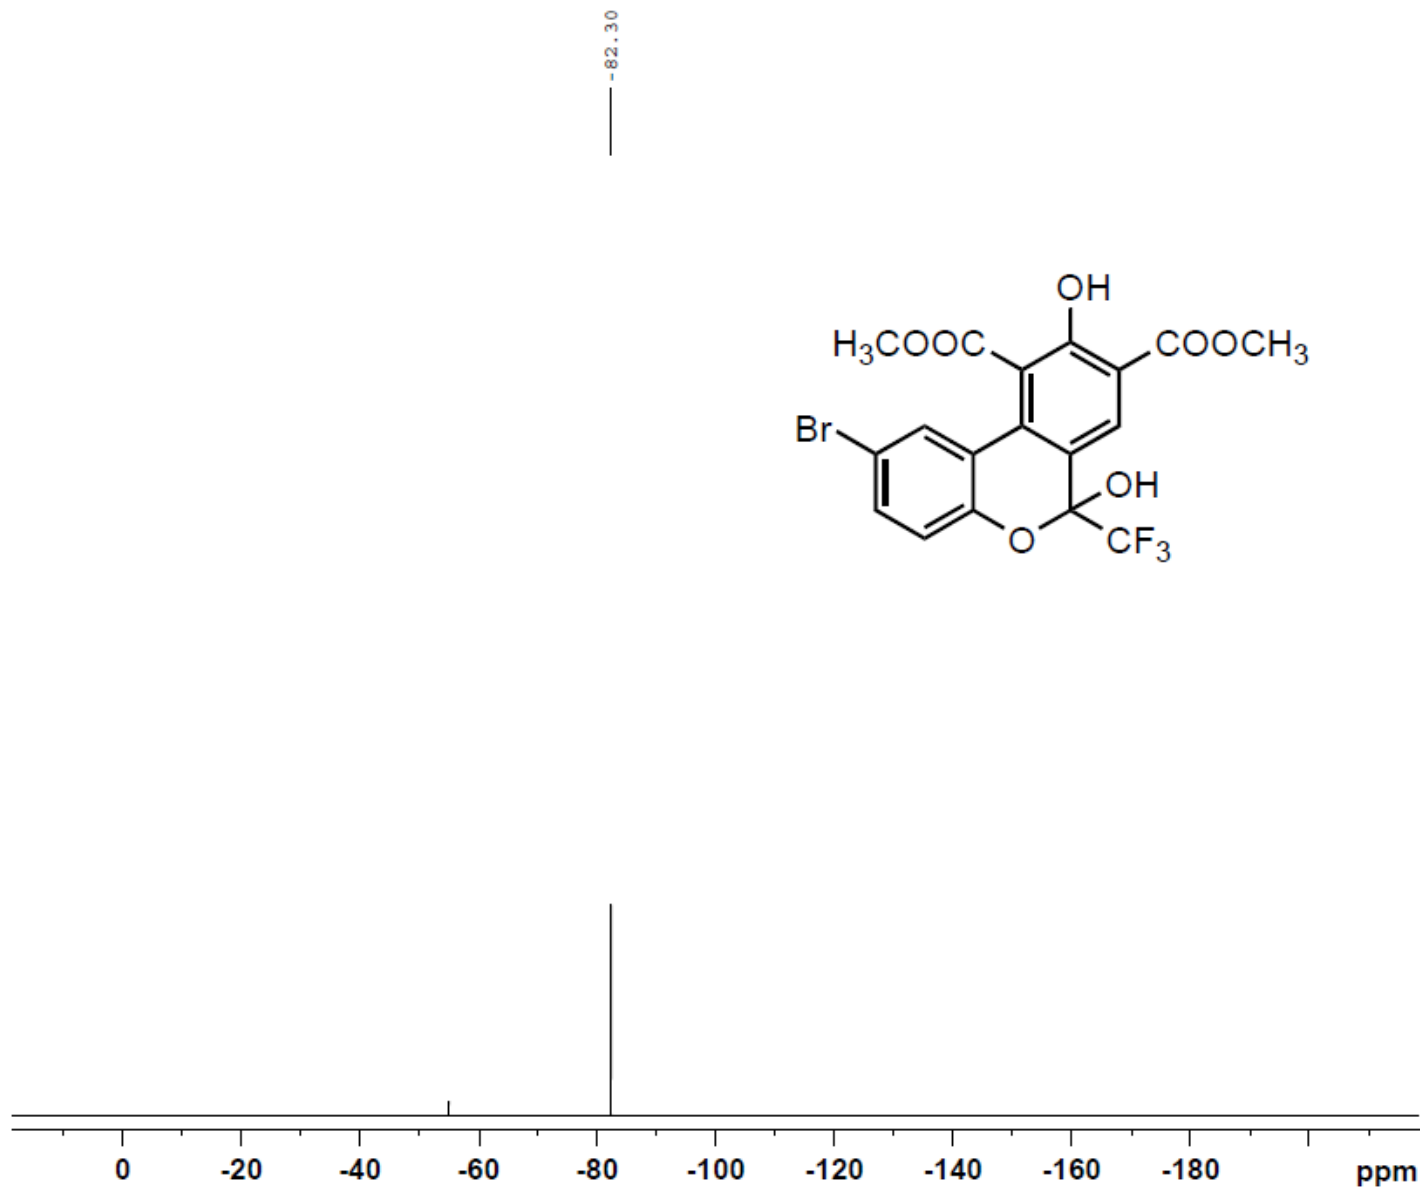

Savych, IS-105.1, DMSO, 1H

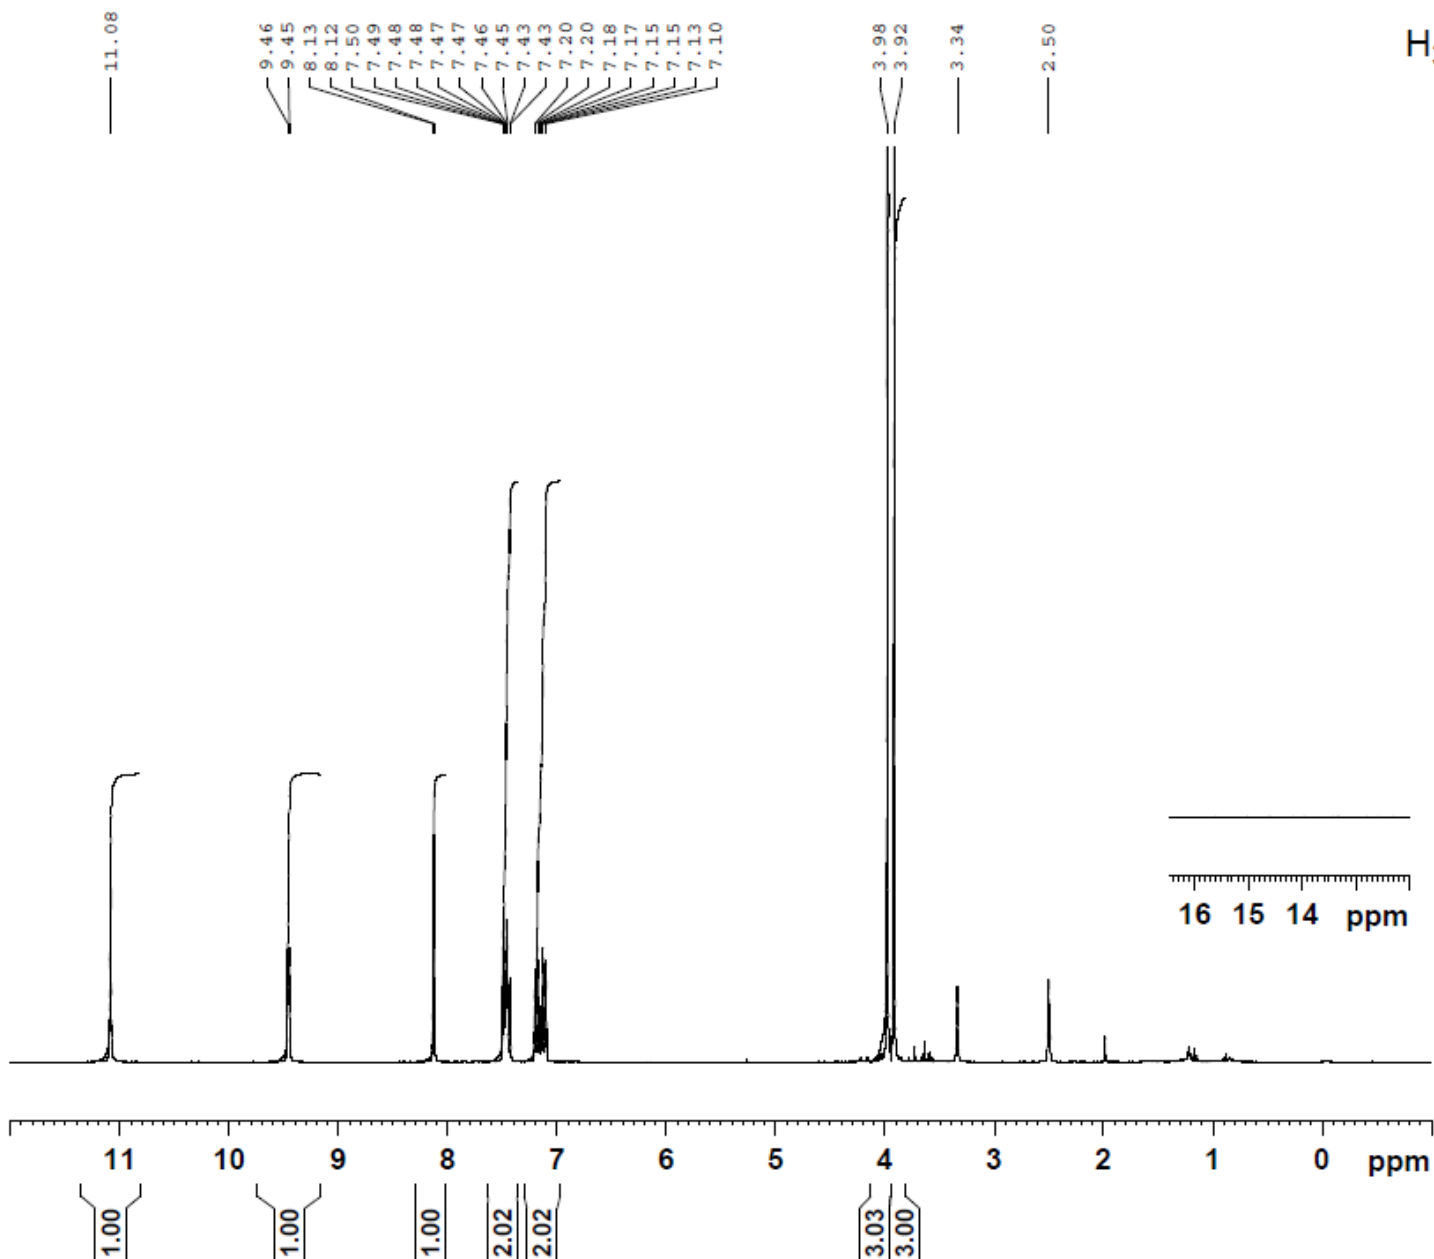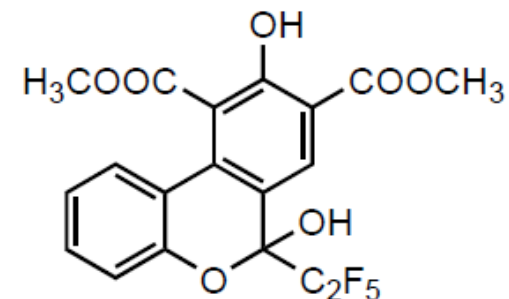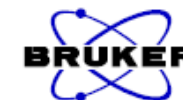

Current Data Parameters  
 NAME 110427.u325 IS-105.1  
 EXPNO 10  
 PROCNO 1

F2 - Acquisition Parameters  
 Date\_ 20110427  
 Time 13.29  
 INSTRUM spect  
 PROBHD 5 mm PABBO BB-  
 PULPROG zg30  
 TD 65536  
 SOLVENT DMSO  
 NS 16  
 DS 2  
 SWH 6188.119 Hz  
 FIDRES 0.094423 Hz  
 AQ 5.2953587 sec  
 RG 114  
 DW 80.800 usec  
 DE 10.00 usec  
 TE 298.2 K  
 D1 1.00000000 sec  
 TD0 1

===== CHANNEL f1 =====  
 NUC1 1H  
 P1 10.00 usec  
 PL1 0.00 dB  
 PL1W 11.25325108 W  
 SFO1 300.1318534 MHz

F2 - Processing parameters  
 SI 32768  
 SF 300.1300060 MHz  
 WDW EM  
 SSB 0  
 LB 0.30 Hz  
 GB 0  
 PC 1.00

Savych, IS-105.1, DMSO, 13C

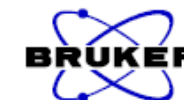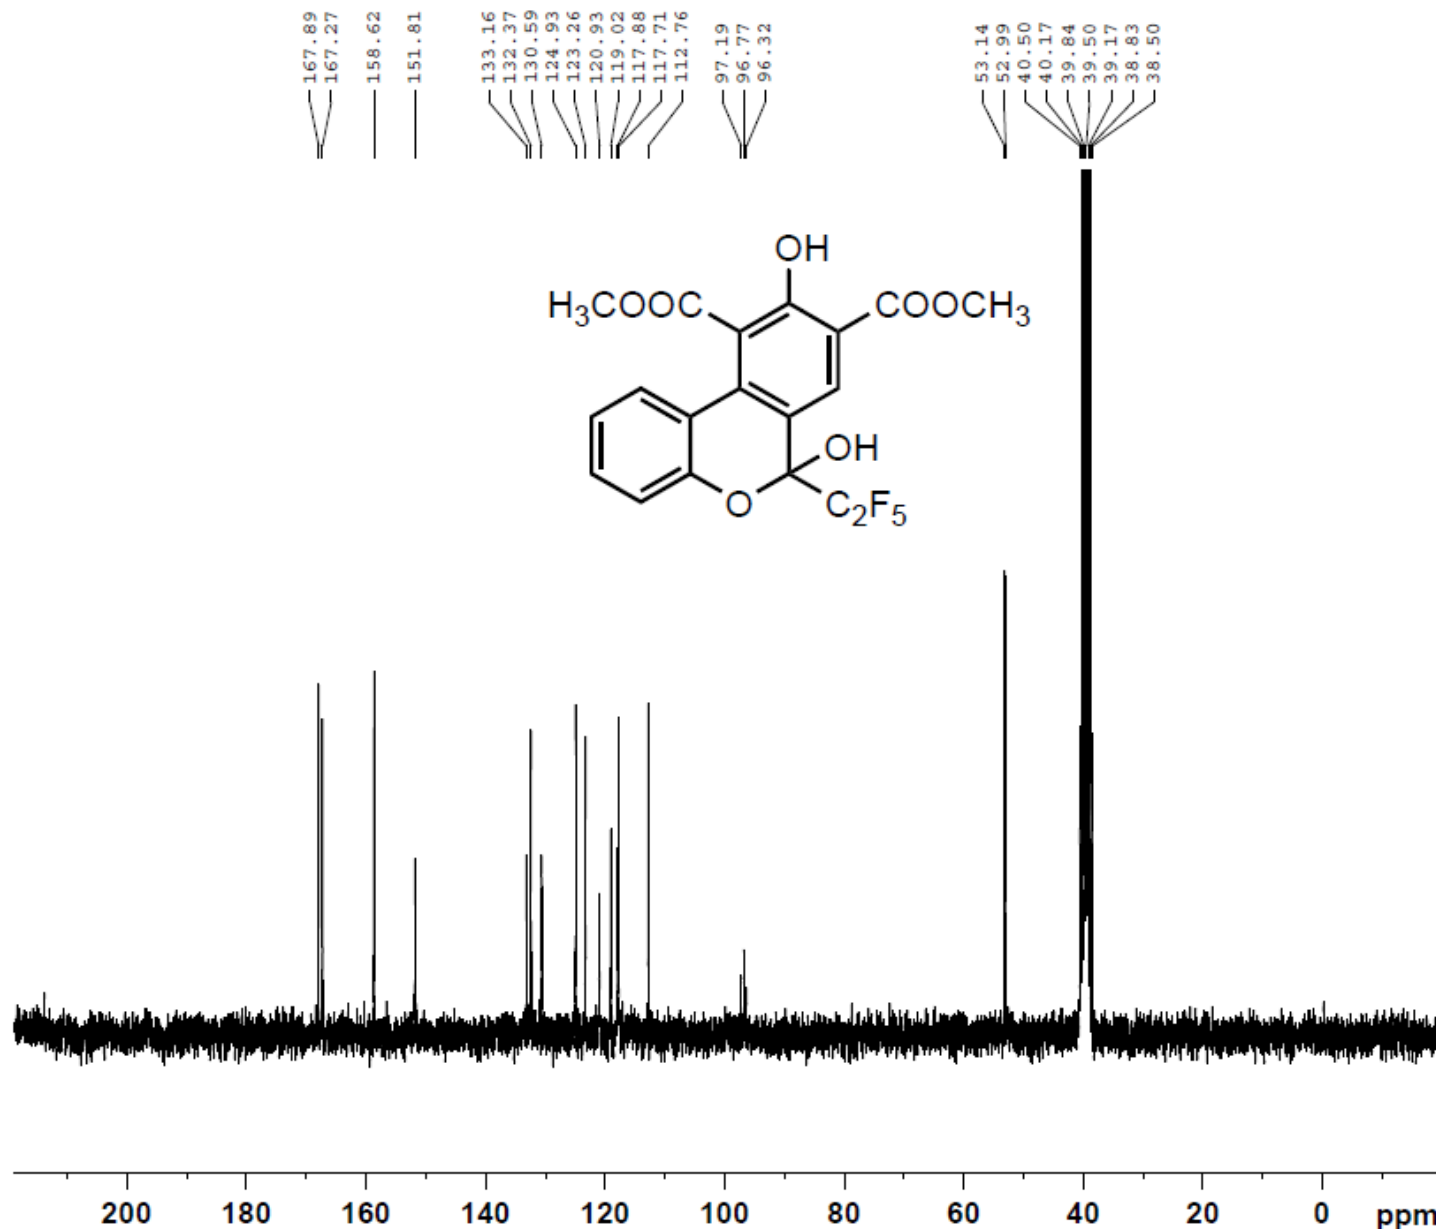

Current Data Parameters  
NAME 110428.213  
EXPNO 10  
PROCNO 1

F2 - Acquisition Parameters  
Date\_ 20110428  
Time 23.03  
INSTRUM spect  
PROBHD 5 mm PABBO BB-  
PULPROG zgpg30  
TD 65536  
SOLVENT DMSO  
NS 512  
DS 4  
SWH 15000.000 Hz  
FIDRES 0.228882 Hz  
AQ 2.1845834 sec  
RG 2050  
DW 33.333 usec  
DE 10.00 usec  
TE 297.9 K  
D1 2.0000000 sec  
d11 0.03000000 sec  
DELTA 1.89999998 sec  
TD0 1

===== CHANNEL f1 =====  
NUC1 13C  
P1 10.00 usec  
PL1 -1.00 dB  
SFO1 62.9015280 MHz

===== CHANNEL f2 =====  
CPDPRG2 waltz16  
NUC2 1H  
PCPD2 70.00 usec  
PL12 15.00 dB  
PL13 15.00 dB  
PL2 -2.50 dB  
SFO2 250.1310005 MHz

F2 - Processing parameters  
SI 32768  
SF 62.8952674 MHz  
WDW EM  
SSB 0  
LB 1.00 Hz  
GB 0  
PC 1.40

Savych, IS-105.1, DMSO, 19F

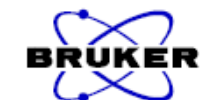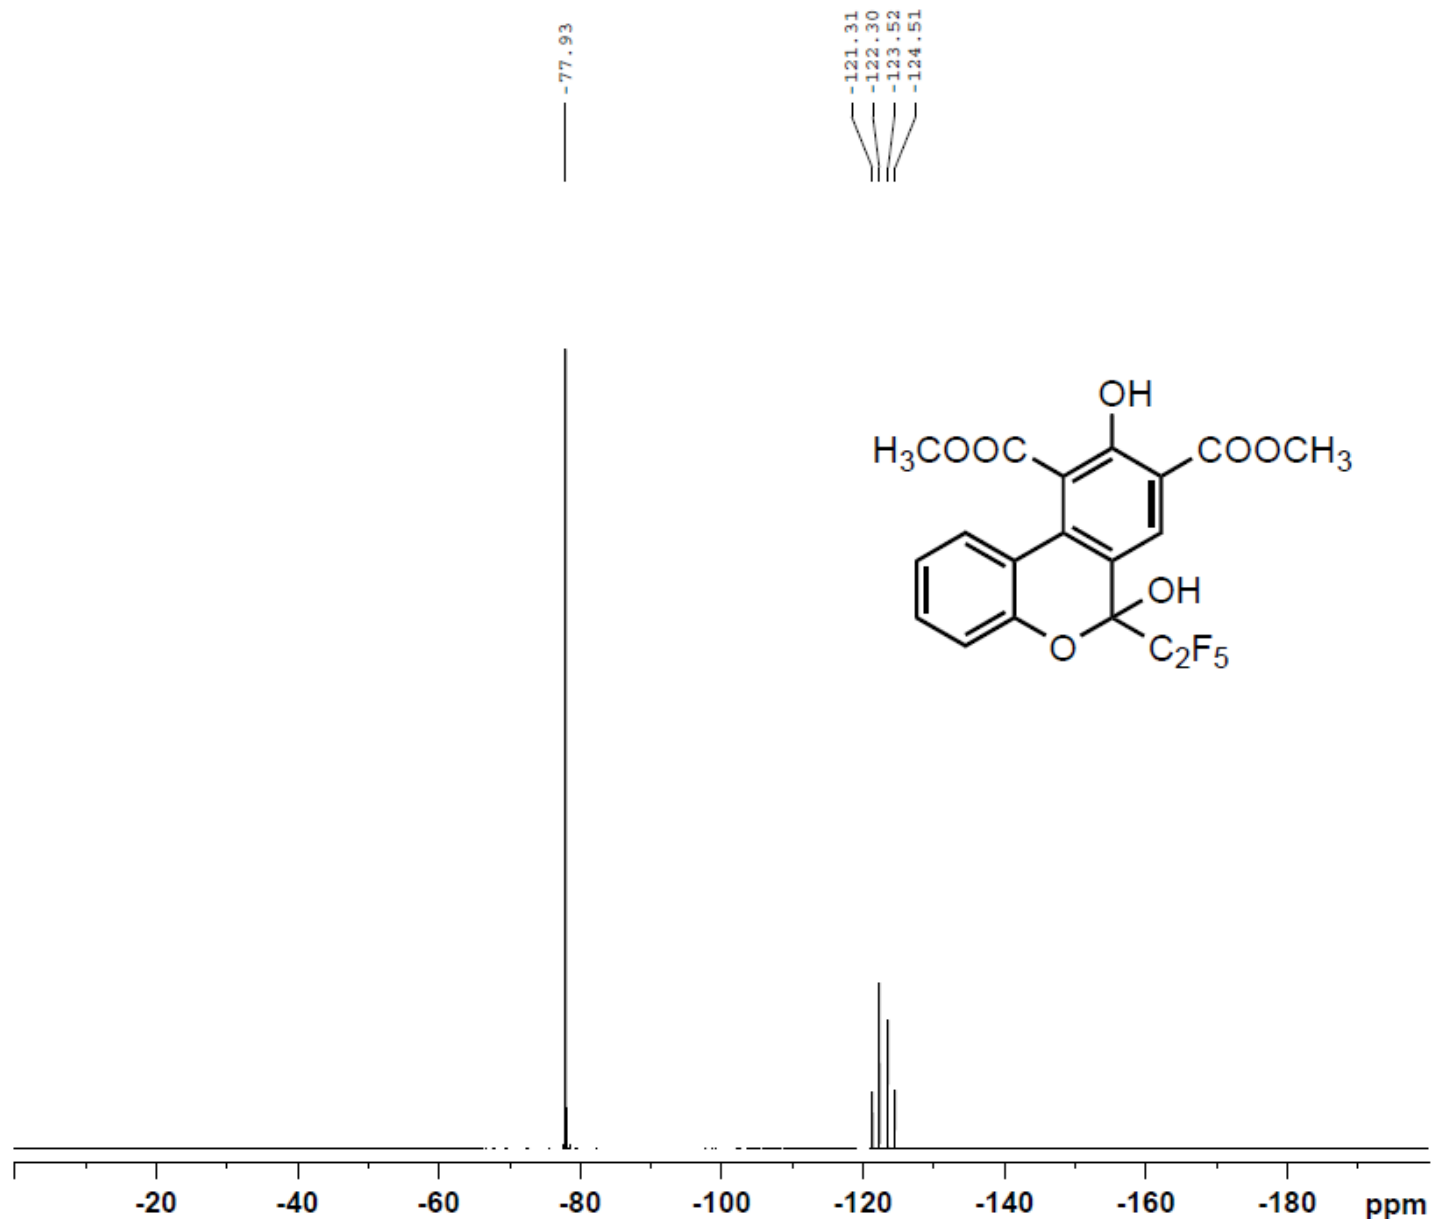

Current Data Parameters  
NAME 110427.u325 IS-105.1  
EXPNO 11  
PROCNO 1

F2 - Acquisition Parameters  
Date\_ 20110427  
Time 13.33  
INSTRUM spect  
PROBHD 5 mm PABBO BB-  
PULPROG zgfhigqn  
TD 131072  
SOLVENT DMSO  
NS 64  
DS 4  
SWH 66964.289 Hz  
FIDRES 0.510897 Hz  
AQ 0.9787210 sec  
RG 2050  
DW 7.467 usec  
DE 10.00 usec  
TE 298.6 K  
D1 1.00000000 sec  
D11 0.03000000 sec  
D12 0.00002000 sec  
TD0 1

===== CHANNEL f1 =====  
NUC1 19F  
P1 10.00 usec  
PL1 -3.00 dB  
PL1W 15.53680420 W  
SFO1 282.3761148 MHz

===== CHANNEL f2 =====  
CPDPRG2 waltz16  
NUC2 1H  
PCPD2 72.00 usec  
PL2 0.00 dB  
PL12 17.00 dB  
PL2W 11.25325108 W  
PL12W 0.22453187 W  
SFO2 300.1312005 MHz

F2 - Processing parameters  
SI 65536  
SF 282.4043550 MHz  
WDW EM  
SSB 0  
LB 0.30 Hz  
GB 0  
PC 1.00

Savych IS-125 1H DMSO

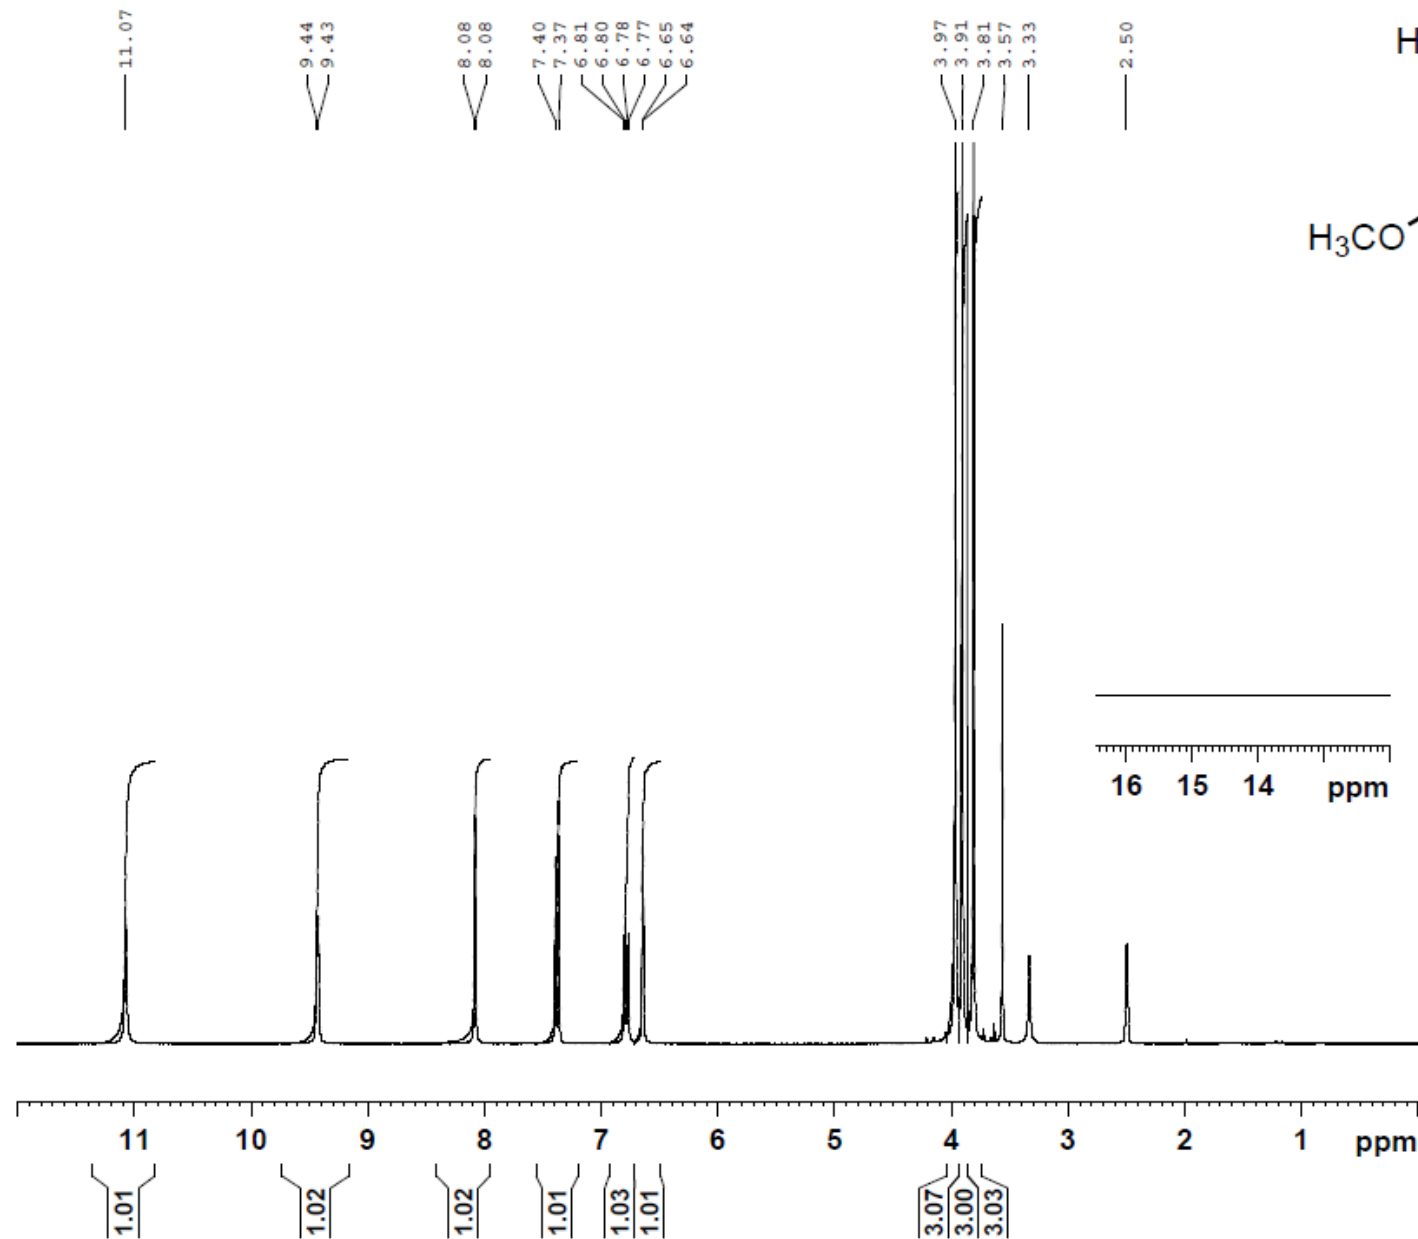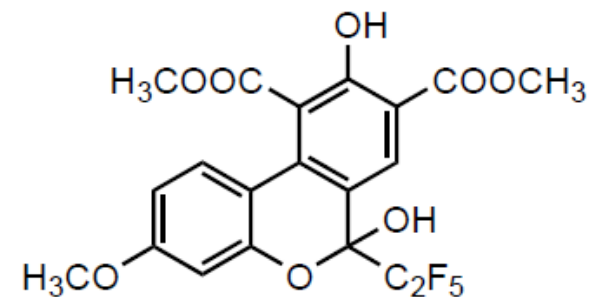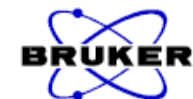

Current Data Parameters  
 NAME 110607.u310 IS-125  
 EXPNO 10  
 PROCNO 1

F2 - Acquisition Parameters  
 Date\_ 20110607  
 Time 10.56  
 INSTRUM spect  
 PROBHD 5 mm PABBO BB-  
 PULPROG zg30  
 TD 65536  
 SOLVENT DMSO  
 NS 16  
 DS 2  
 SWH 6188.119 Hz  
 FIDRES 0.094423 Hz  
 AQ 5.2953587 sec  
 RG 114  
 DW 80.800 usec  
 DE 10.00 usec  
 TE 298.2 K  
 D1 1.00000000 sec  
 TD0 1

===== CHANNEL f1 =====  
 NUC1 1H  
 P1 10.00 usec  
 PL1 0.00 dB  
 PL1W 11.25325108 W  
 SFO1 300.1318534 MHz

F2 - Processing parameters  
 SI 32768  
 SF 300.1300084 MHz  
 WDW EM  
 SSB 0  
 LB 0.30 Hz  
 GB 0  
 PC 1.00



Savych IS-125 13C DMSO

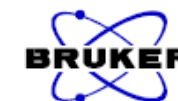

Current Data Parameters  
 NAME 110607.209  
 EXPNO 10  
 PROCNO 1

F2 - Acquisition Parameters  
 Date\_ 20110608  
 Time 0.23  
 INSTRUM spect  
 PROBHD 5 mm PABBO BB-  
 PULPROG zgpg30  
 TD 65536  
 SOLVENT DMSO  
 NS 1024  
 DS 4  
 SWH 15000.000 Hz  
 FIDRES 0.228882 Hz  
 AQ 2.1845834 sec  
 RG 2050  
 DW 33.333 usec  
 DE 10.00 usec  
 TE 297.8 K  
 D1 2.0000000 sec  
 d11 0.03000000 sec  
 DELTA 1.89999998 sec  
 TD0 1

===== CHANNEL f1 =====  
 NUC1 13C  
 P1 10.00 usec  
 PL1 -1.00 dB  
 SFO1 62.9015280 MHz

===== CHANNEL f2 =====  
 CPDPRG2 waltz16  
 NUC2 1H  
 PCPD2 70.00 usec  
 PL12 15.00 dB  
 PL13 15.00 dB  
 PL2 -2.50 dB  
 SFO2 250.1310005 MHz

F2 - Processing parameters  
 SI 32768  
 SF 62.8952674 MHz  
 WDW EM  
 SSB 0  
 LB 1.00 Hz  
 GB 0  
 PC 1.40

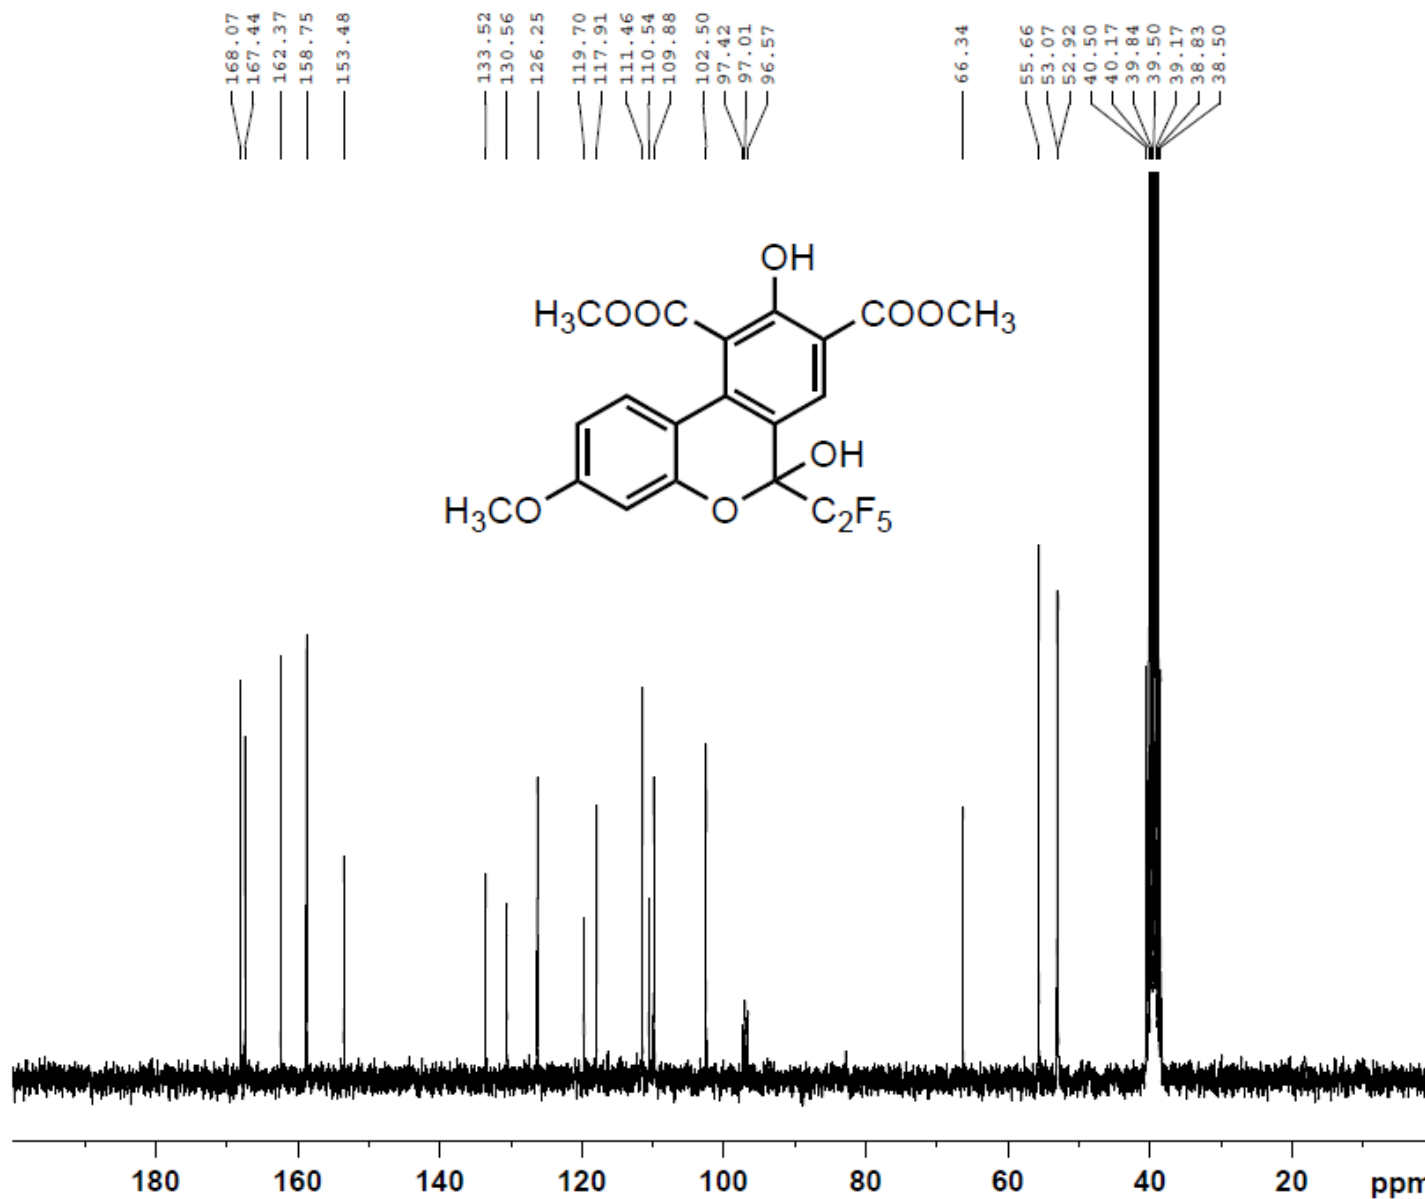

Savych IS-125 19F DMSO

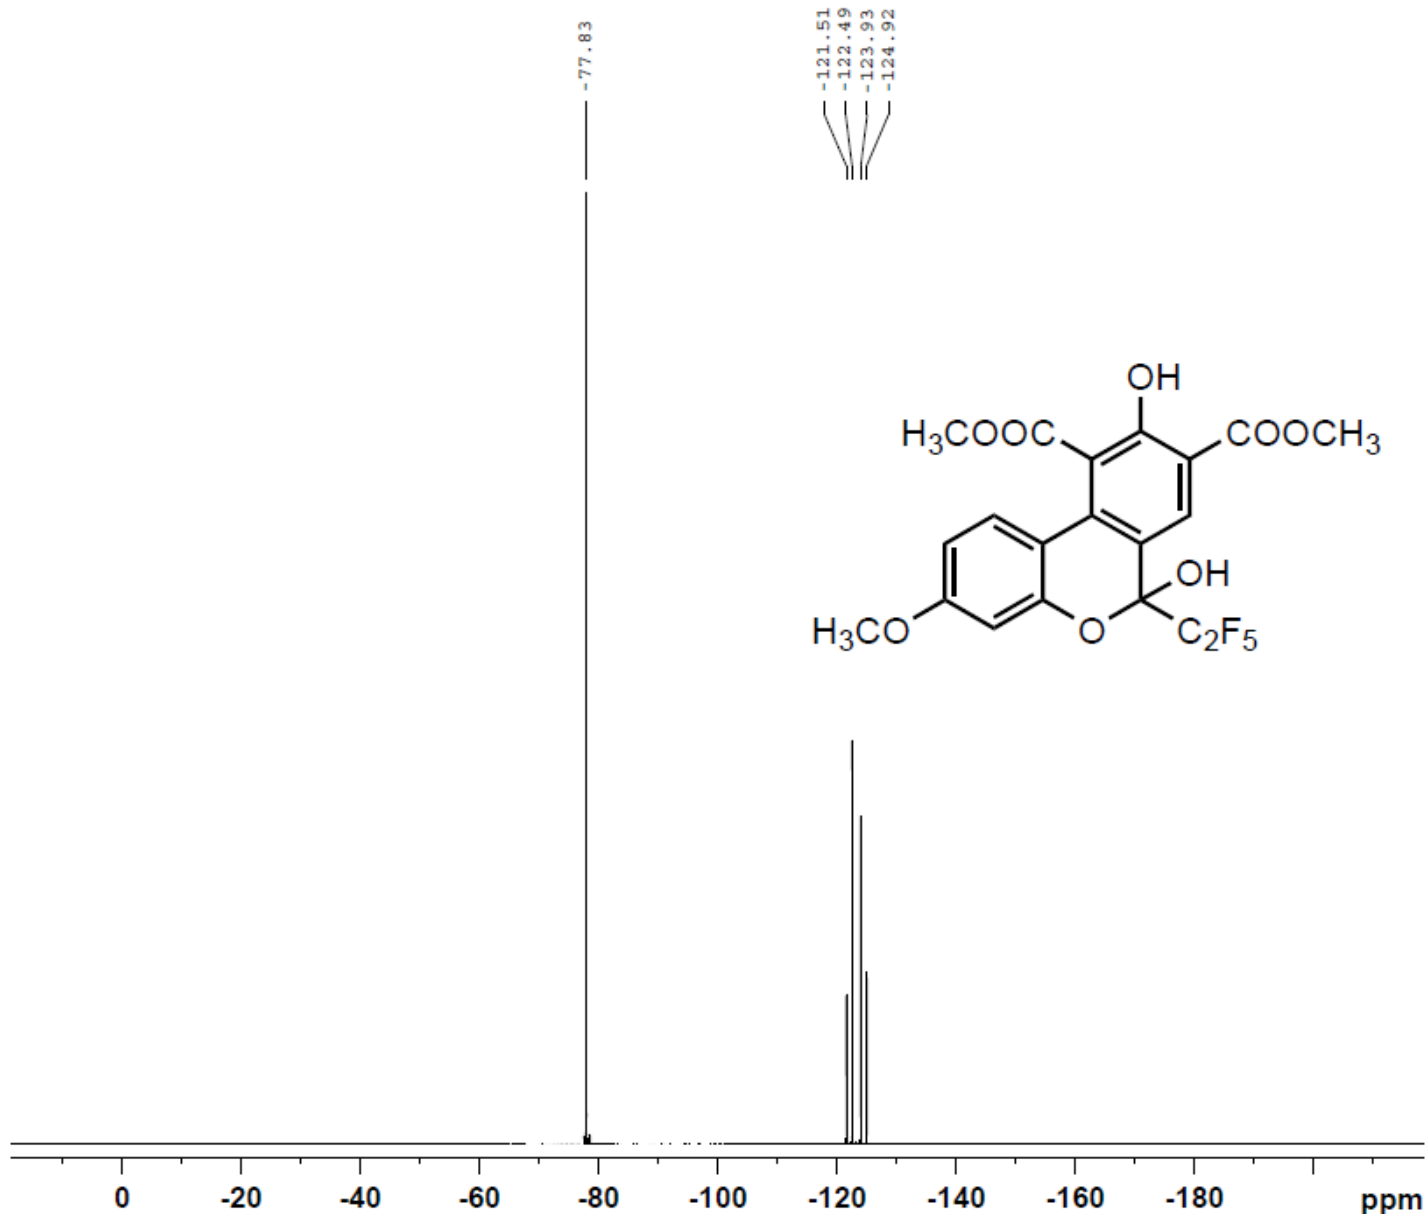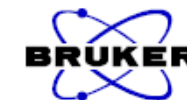

Current Data Parameters  
NAME 110607.u310 IS-125  
EXPNO 11  
PROCNO 1

F2 - Acquisition Parameters  
Date\_ 20110607  
Time 11.00  
INSTRUM spect  
PROBHD 5 mm PABBO BB-  
PULPROG zgfhigqn  
TD 131072  
SOLVENT DMSO  
NS 48  
DS 4  
SWH 66964.289 Hz  
FIDRES 0.510897 Hz  
AQ 0.9787210 sec  
RG 2050  
DW 7.467 usec  
DE 10.00 usec  
TE 298.4 K  
D1 1.00000000 sec  
D11 0.03000000 sec  
D12 0.00002000 sec  
TD0 1

===== CHANNEL f1 =====  
NUC1 19F  
P1 10.00 usec  
PL1 -3.00 dB  
PL1W 15.53680420 W  
SFO1 282.3761148 MHz

===== CHANNEL f2 =====  
CPDPRG2 waltz16  
NUC2 1H  
PCPD2 72.00 usec  
PL2 0.00 dB  
PL12 17.00 dB  
PL2W 11.25325108 W  
PL12W 0.22453187 W  
SFO2 300.1312005 MHz

F2 - Processing parameters  
SI 65536  
SF 282.4043550 MHz  
WDW EM  
SSB 0  
LB 0.30 Hz  
GB 0  
PC 1.00

Savych, IS-135, DMSO, 1H

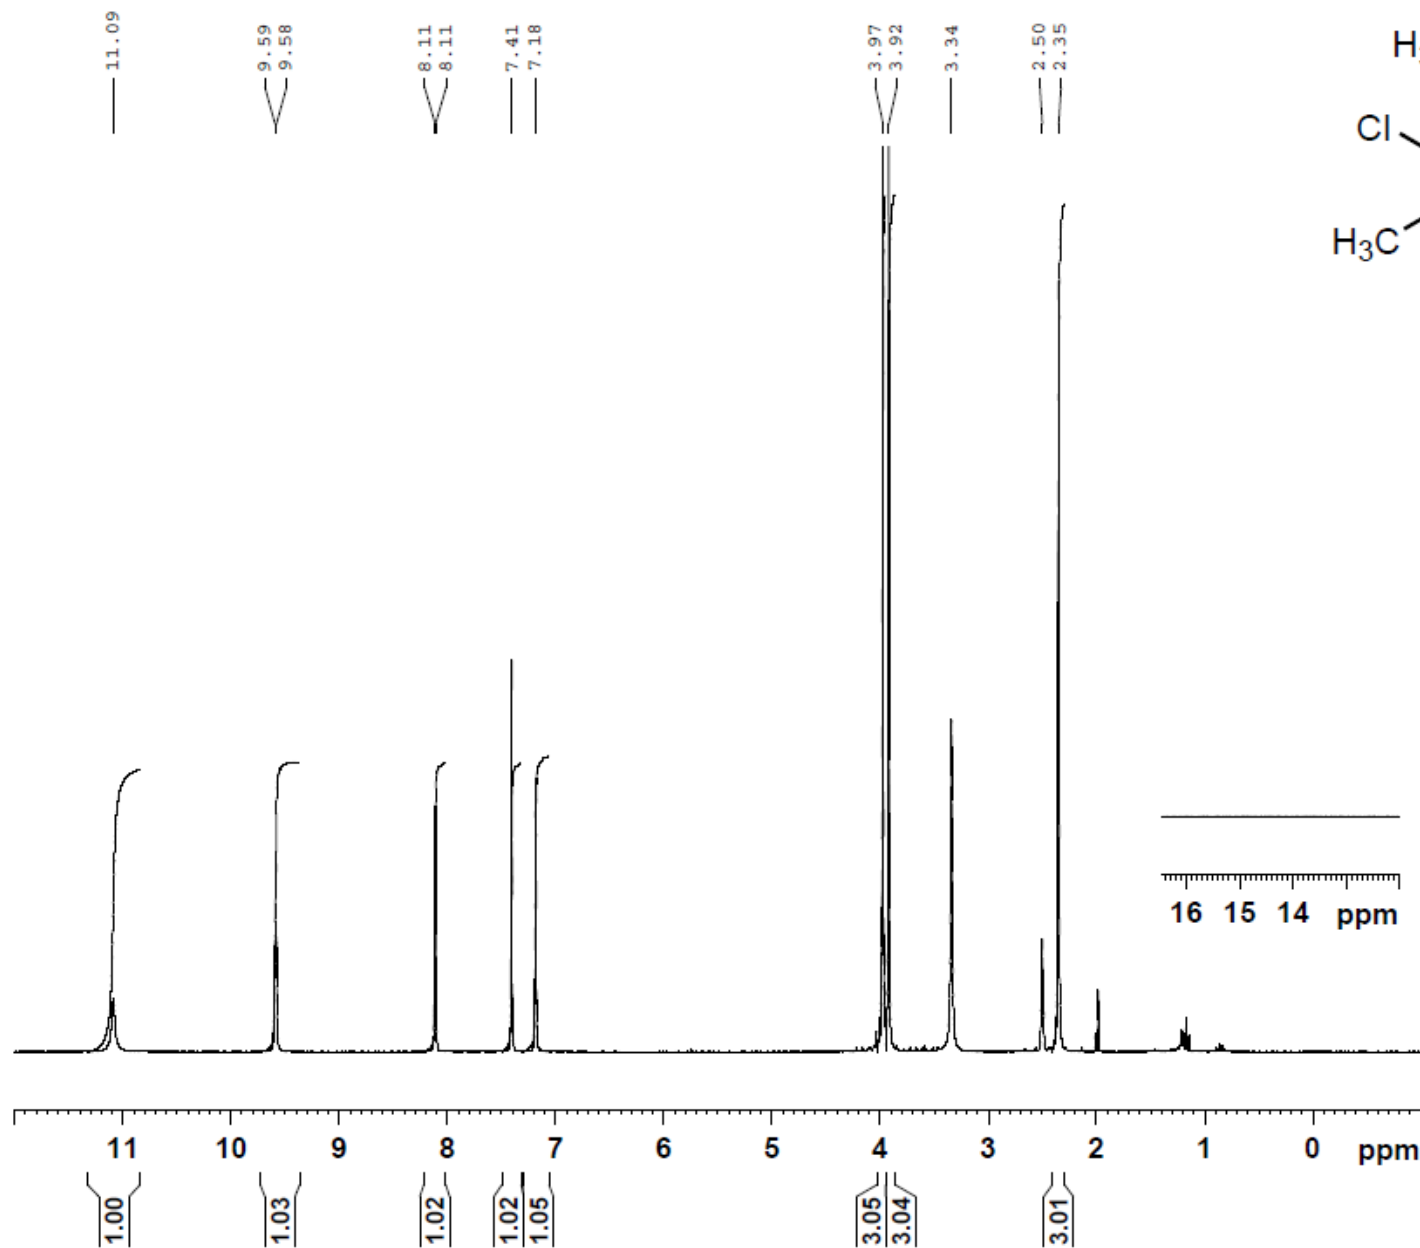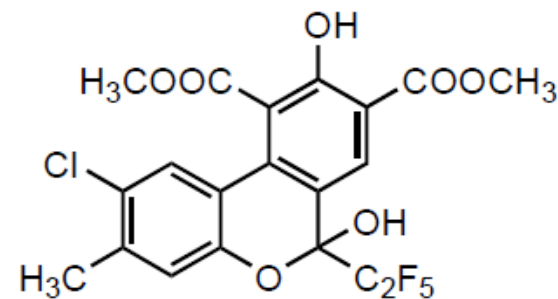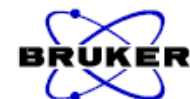

Current Data Parameters  
NAME 110623.u319 IS-135  
EXPNO 10  
PROCNO 1

F2 - Acquisition Parameters  
Date\_ 20110623  
Time 14.13  
INSTRUM spect  
PROBHD 5 mm PABBO BB-  
PULPROG zg30  
TD 65536  
SOLVENT DMSO  
NS 16  
DS 2  
SWH 6188.119 Hz  
FIDRES 0.094423 Hz  
AQ 5.2953587 sec  
RG 144  
DW 80.800 usec  
DE 10.00 usec  
TE 298.2 K  
D1 1.0000000 sec  
TD0 1

----- CHANNEL f1 -----  
NUC1 1H  
P1 10.00 usec  
PL1 0.00 dB  
PL1W 11.25325108 W  
SFO1 300.1318534 MHz

F2 - Processing parameters  
SI 32768  
SF 300.1300077 MHz  
WDW EM  
SSB 0  
LB 0.30 Hz  
GB 0  
PC 1.00

Savych, IS-135, DMSO, 13 C

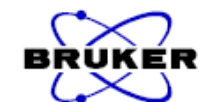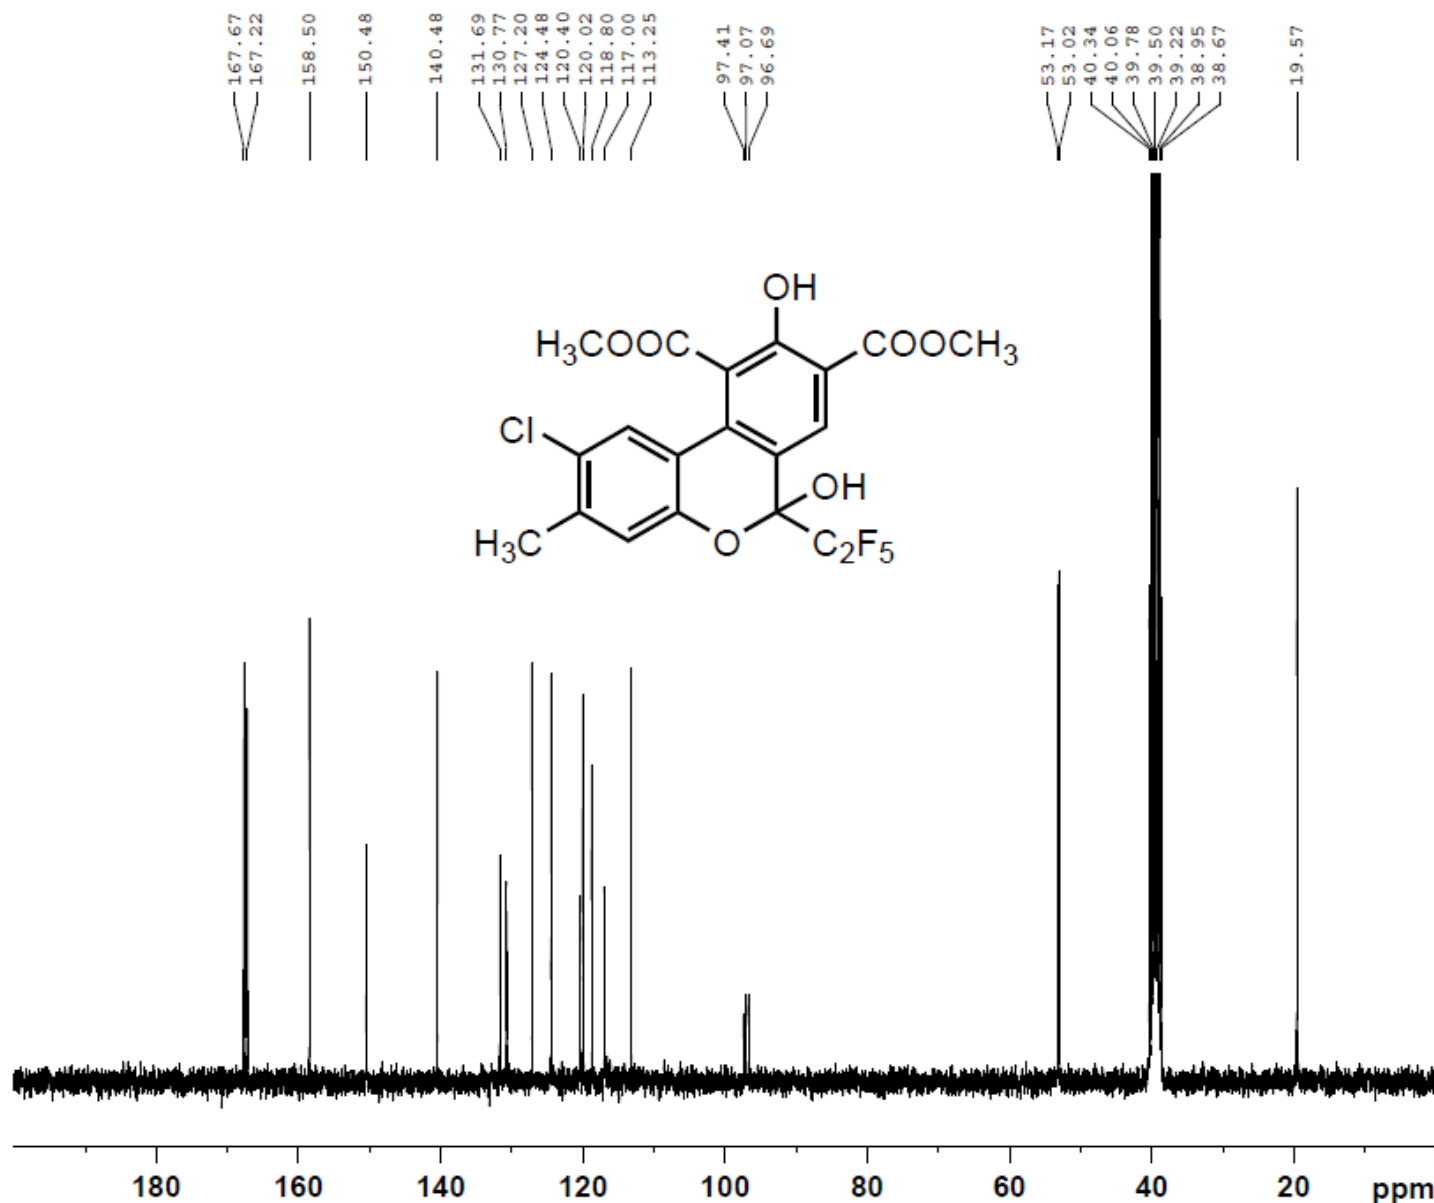

Current Data Parameters  
NAME 110623.u319 IS-135  
EXPNO 12  
PROCNO 1

F2 - Acquisition Parameters  
Date\_ 20110624  
Time 7.25  
INSTRUM spect  
PROBHD 5 mm PABBO BB-  
PULPROG zgpg30  
TD 65536  
SOLVENT DMSO  
NS 1024  
DS 4  
SWH 18028.846 Hz  
FIDRES 0.275098 Hz  
AQ 1.8175818 sec  
RG 2050  
DW 27.733 usec  
DE 10.00 usec  
TE 298.5 K  
D1 2.0000000 sec  
D11 0.03000000 sec  
TD0 1

===== CHANNEL f1 =====  
NUC1 13C  
P1 10.00 usec  
PL1 -0.50 dB  
PL1W 33.25691986 W  
SFO1 75.4752953 MHz

===== CHANNEL f2 =====  
CPDPRG2 waltz16  
NUC2 1H  
PCPD2 72.00 usec  
PL2 0.00 dB  
PL12 17.00 dB  
PL13 17.00 dB  
PL2W 11.25325108 W  
PL12W 0.22453187 W  
PL13W 0.22453187 W  
SFO2 300.1312005 MHz

F2 - Processing parameters  
SI 32768  
SF 75.4677854 MHz  
WDW EM  
SSB 0  
LB 1.00 Hz  
GB 0  
PC 1.40

Savych, IS-135, DMSO, 19F

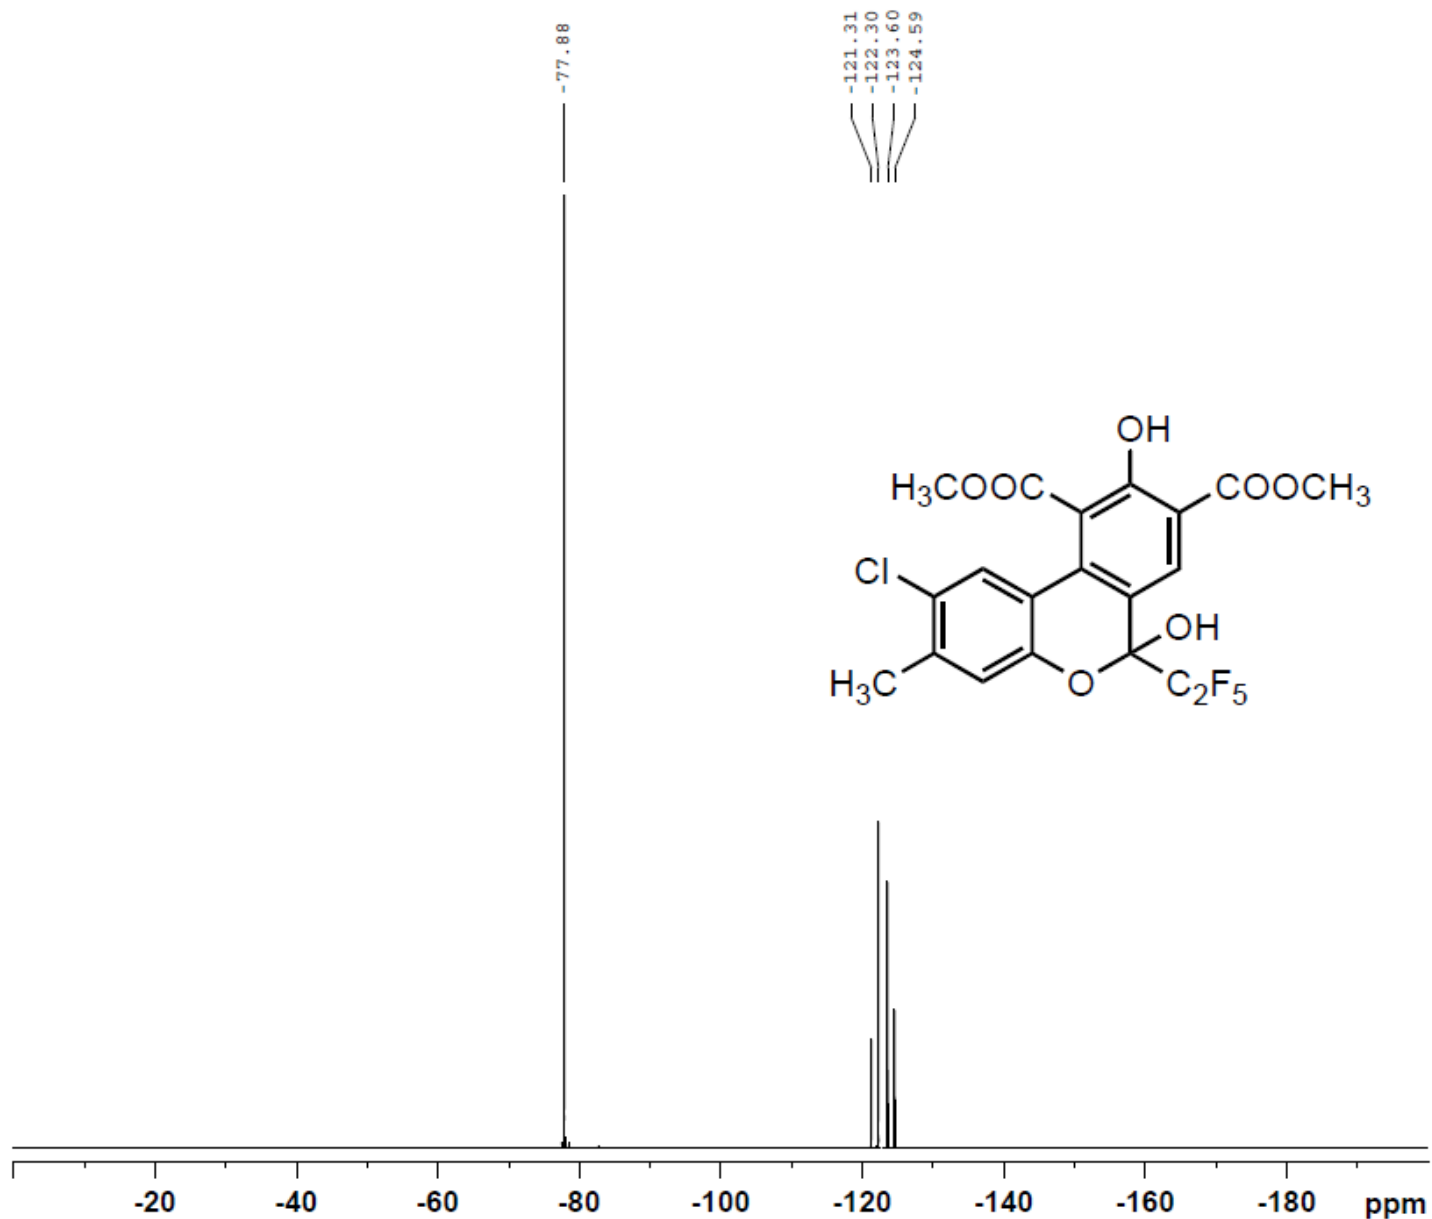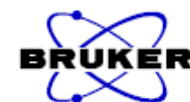

Current Data Parameters  
NAME 110623.u319 IS-135  
EXPNO 11  
PROCNO 1

F2 - Acquisition Parameters  
Date\_ 20110623  
Time 14.19  
INSTRUM spect  
PROBHD 5 mm PABBO BB-  
PULPROG zgfhigqn  
TD 131072  
SOLVENT DMSO  
NS 128  
DS 4  
SWH 66964.289 Hz  
FIDRES 0.510897 Hz  
AQ 0.9787210 sec  
RG 2050  
DW 7.467 usec  
DE 10.00 usec  
TE 298.2 K  
D1 1.00000000 sec  
D11 0.03000000 sec  
D12 0.00002000 sec  
TD0 1

===== CHANNEL f1 =====  
NUC1 19F  
P1 10.00 usec  
PL1 -3.00 dB  
PL1W 15.53680420 W  
SFO1 282.3761148 MHz

===== CHANNEL f2 =====  
CPDPRG2 waltz16  
NUC2 1H  
PCPD2 72.00 usec  
PL2 0.00 dB  
PL12 17.00 dB  
PL2W 11.25325108 W  
PL12W 0.22453187 W  
SFO2 300.1312005 MHz

F2 - Processing parameters  
SI 65536  
SF 282.4043550 MHz  
WDW EM  
SSB 0  
LB 0.30 Hz  
GB 0  
PC 1.00

Savych IS-127 1H DMSO

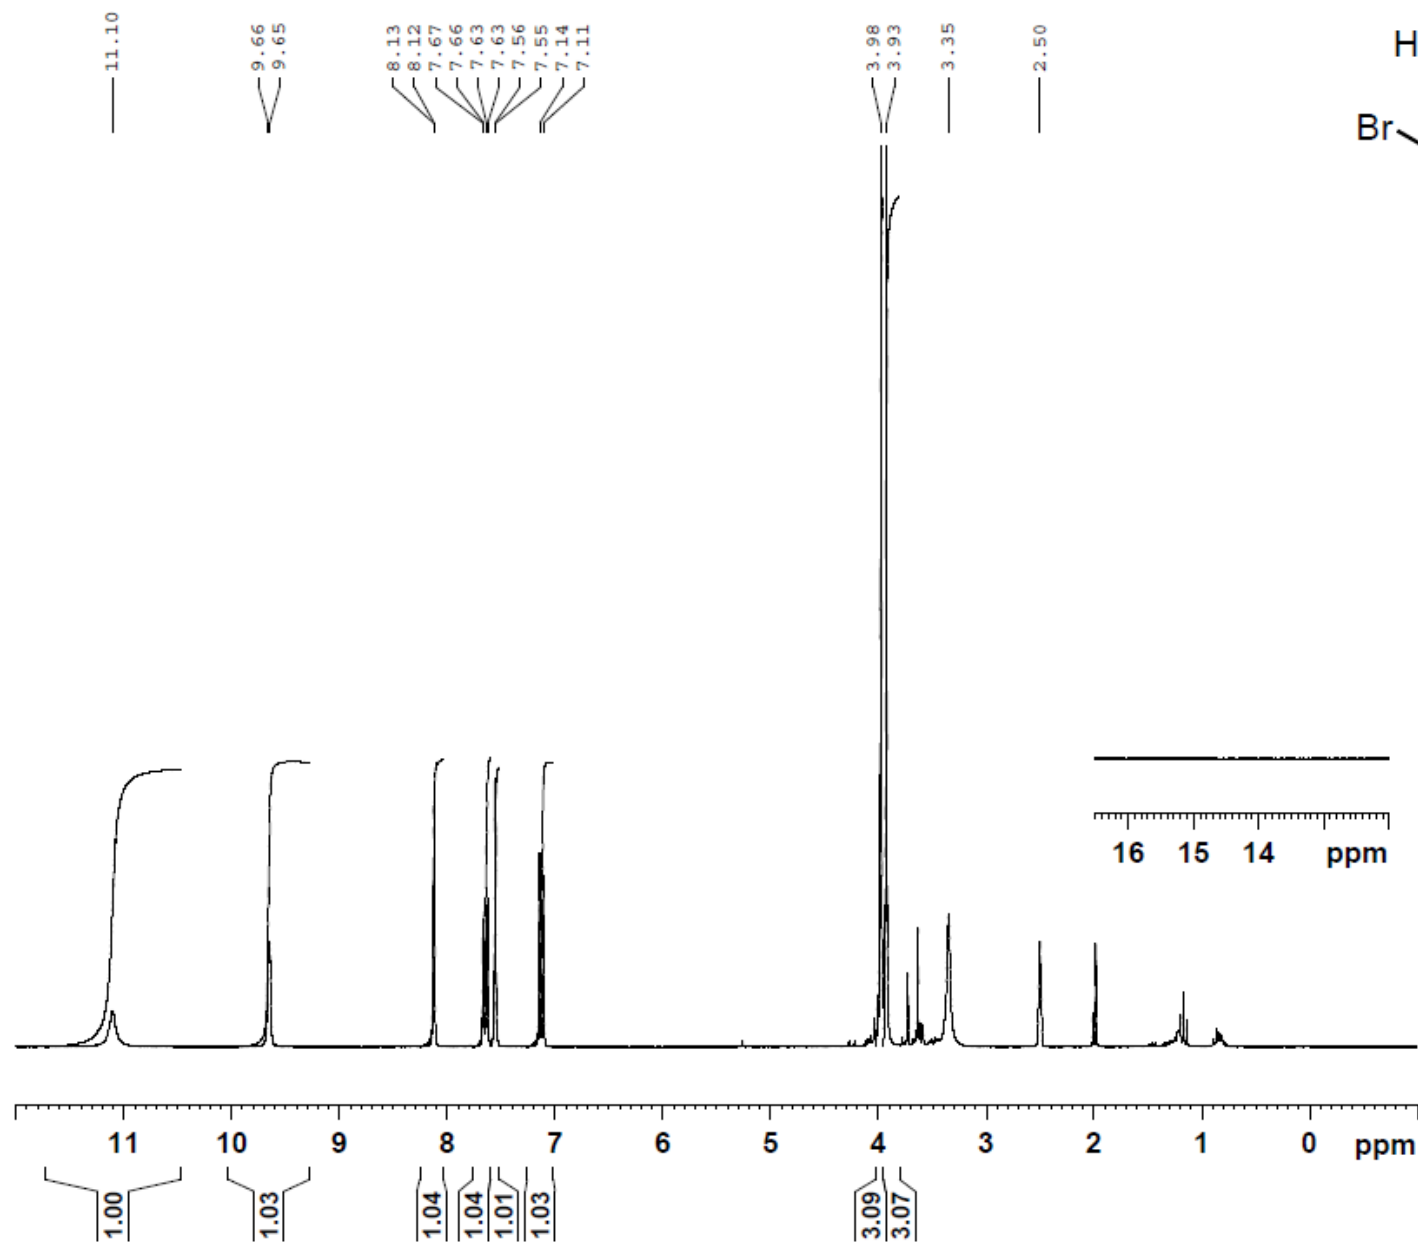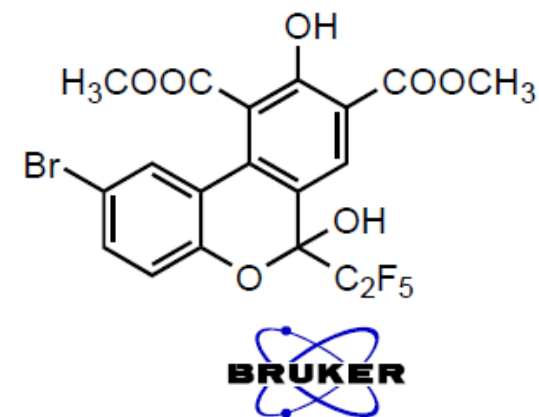

Current Data Parameters

NAME 110609.208 IS-127  
 EXPNO 10  
 PROCNO 1

F2 - Acquisition Parameters

Date\_ 20110609  
 Time 13.47  
 INSTRUM spect  
 PROBHD 5 mm PABBO BB-  
 PULPROG zg30  
 TD 65536  
 SOLVENT DMSO  
 NS 16  
 DS 2  
 SWH 5165.289 Hz  
 FIDRES 0.078816 Hz  
 AQ 6.3439350 sec  
 RG 645  
 DW 96.800 usec  
 DE 10.00 usec  
 TE 297.1 K  
 D1 1.00000000 sec  
 TD0 1

===== CHANNEL f1 =====

NUC1 1H  
 P1 10.00 usec  
 PL1 -2.50 dB  
 SFO1 250.1315447 MHz

F2 - Processing parameters

SI 32768  
 SF 250.1299986 MHz  
 WDW EM  
 SSB 0  
 LB 0.30 Hz  
 GB 0  
 PC 1.00

Savych IS-127 13C DMSO

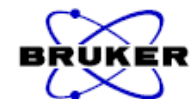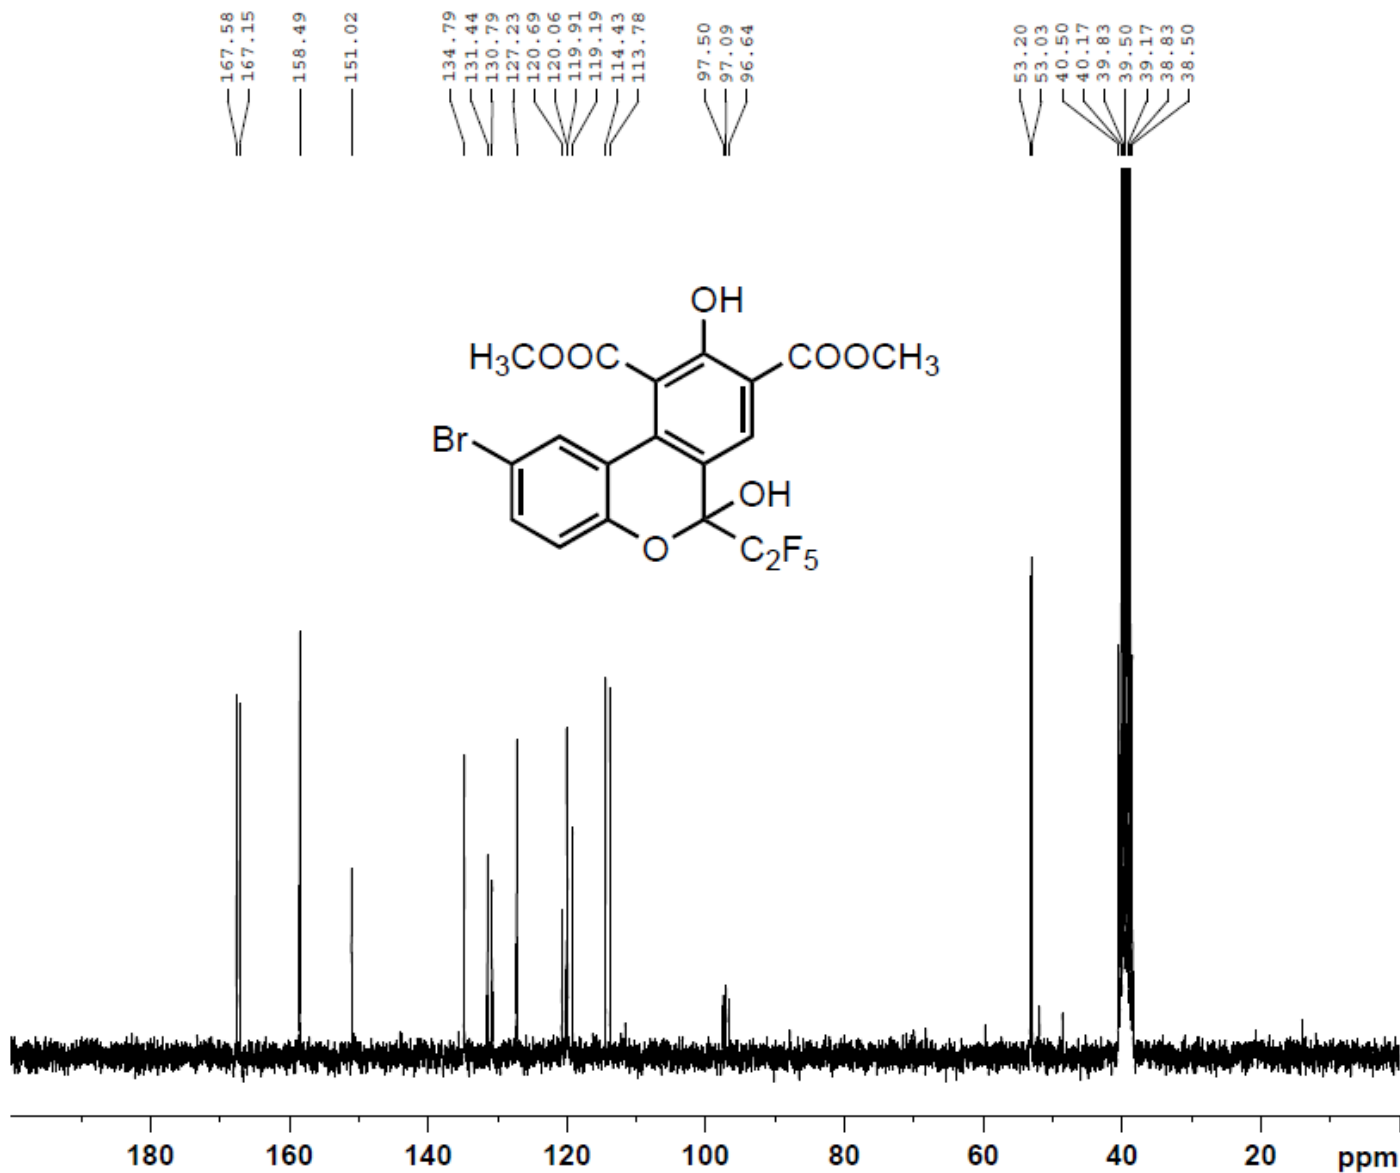

Current Data Parameters  
 NAME 110609.208 IS-127  
 EXPNO 11  
 PROCNO 1

F2 - Acquisition Parameters  
 Date\_ 20110610  
 Time 2.07  
 INSTRUM spect  
 PROBHD 5 mm PABBO BB-  
 PULPROG zgpg30  
 TD 65536  
 SOLVENT DMSO  
 NS 1024  
 DS 4  
 SWH 15000.000 Hz  
 FIDRES 0.228882 Hz  
 AQ 2.1845834 sec  
 RG 2050  
 DW 33.333 usec  
 DE 10.00 usec  
 TE 298.1 K  
 D1 2.00000000 sec  
 d11 0.03000000 sec  
 DELTA 1.89999998 sec  
 TD0 1

===== CHANNEL f1 =====  
 NUC1 13C  
 P1 10.00 usec  
 PL1 -1.00 dB  
 SFO1 62.9015280 MHz

===== CHANNEL f2 =====  
 CPDPRG2 waltz16  
 NUC2 1H  
 PCPD2 70.00 usec  
 PL12 15.00 dB  
 PL13 15.00 dB  
 PL2 -2.50 dB  
 SFO2 250.1310005 MHz

F2 - Processing parameters  
 SI 32768  
 SF 62.8952674 MHz  
 WDW EM  
 SSB 0  
 LB 1.00 Hz  
 GB 0  
 PC 1.40

Savych IS-127 19F DMSO

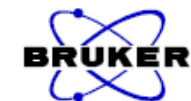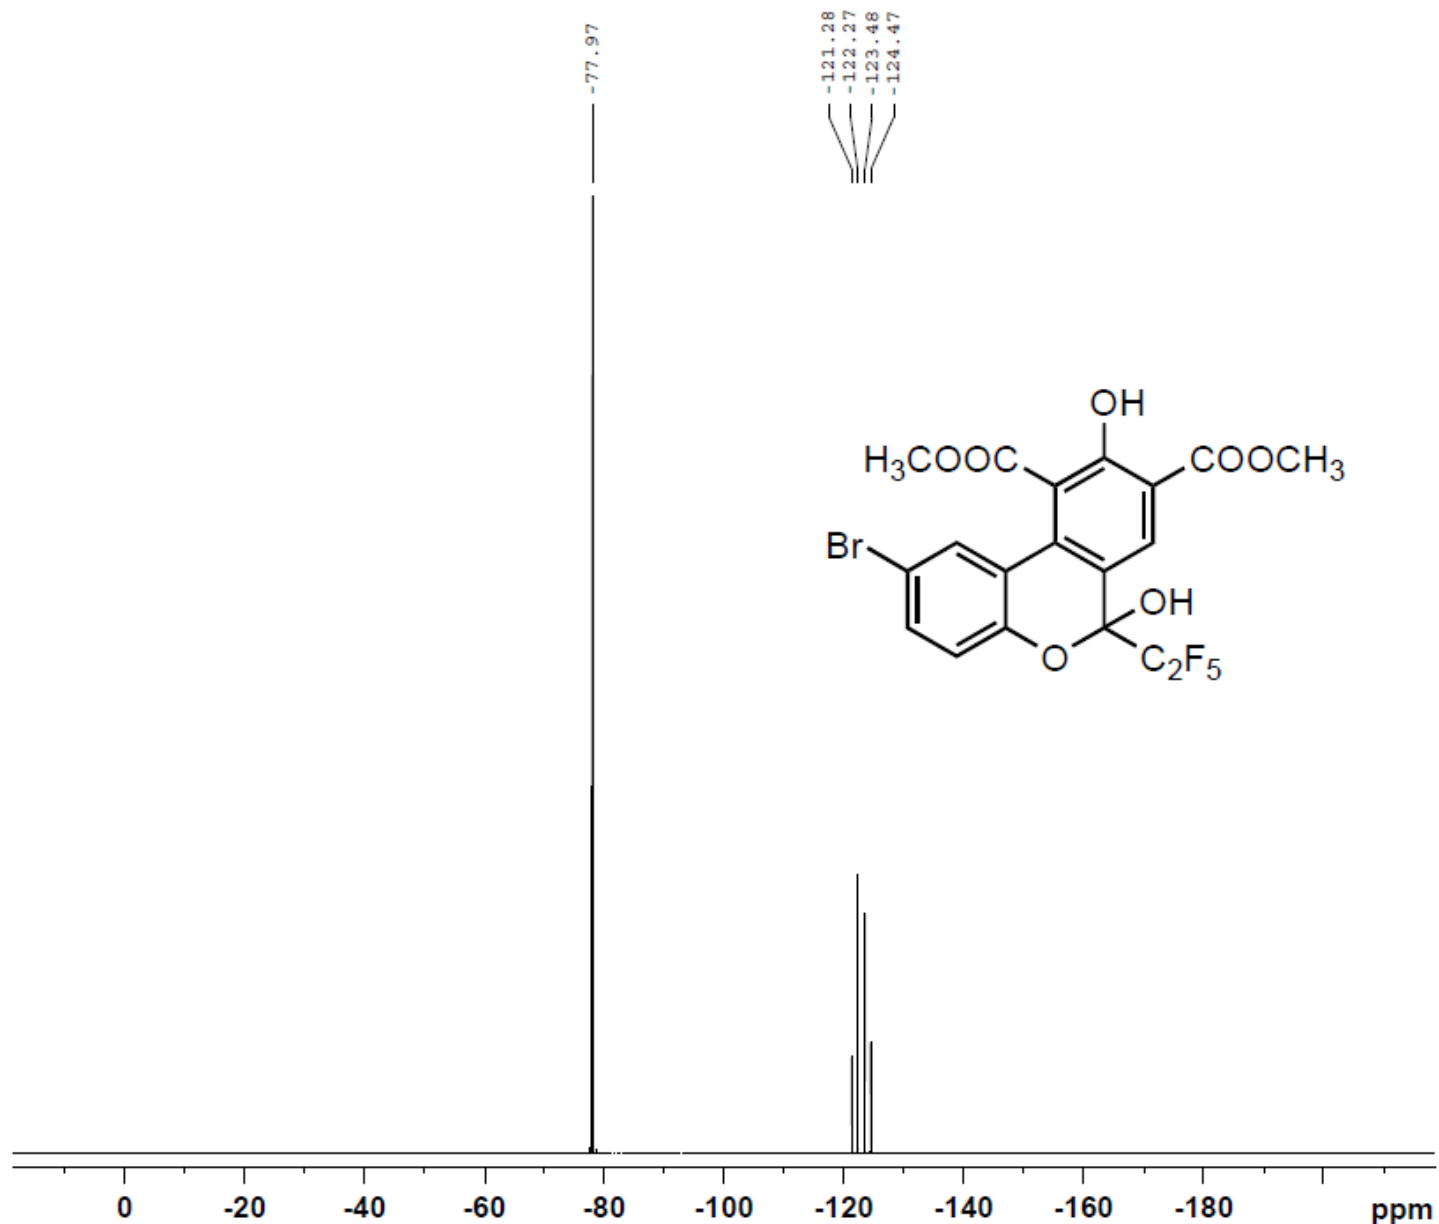

Current Data Parameters  
NAME 110610.u303 IS-127  
EXPNO 10  
PROCNO 1

F2 - Acquisition Parameters  
Date\_ 20110610  
Time 9.00  
INSTRUM spect  
PROBHD 5 mm PABBO BB-  
PULPROG zgfhigqn  
TD 131072  
SOLVENT DMSO  
NS 48  
DS 4  
SWH 66964.289 Hz  
FIDRES 0.510897 Hz  
AQ 0.9787210 sec  
RG 2050  
DW 7.467 usec  
DE 10.00 usec  
TE 298.2 K  
D1 1.00000000 sec  
D11 0.03000000 sec  
D12 0.00002000 sec  
TD0 1

===== CHANNEL f1 =====  
NUC1 19F  
P1 10.00 usec  
PL1 -3.00 dB  
PL1W 15.53680420 W  
SFO1 282.3761148 MHz

===== CHANNEL f2 =====  
CPDPRG2 waltz16  
NUC2 1H  
PCPD2 72.00 usec  
PL2 0.00 dB  
PL12 17.00 dB  
PL2W 11.25325108 W  
PL12W 0.22453187 W  
SFO2 300.1312005 MHz

F2 - Processing parameters  
S1 65536  
SF 282.4043550 MHz  
WDW EM  
SSB 0  
LB 0.30 Hz  
GB 0  
PC 1.00



Savych IS-130 1H DMSO

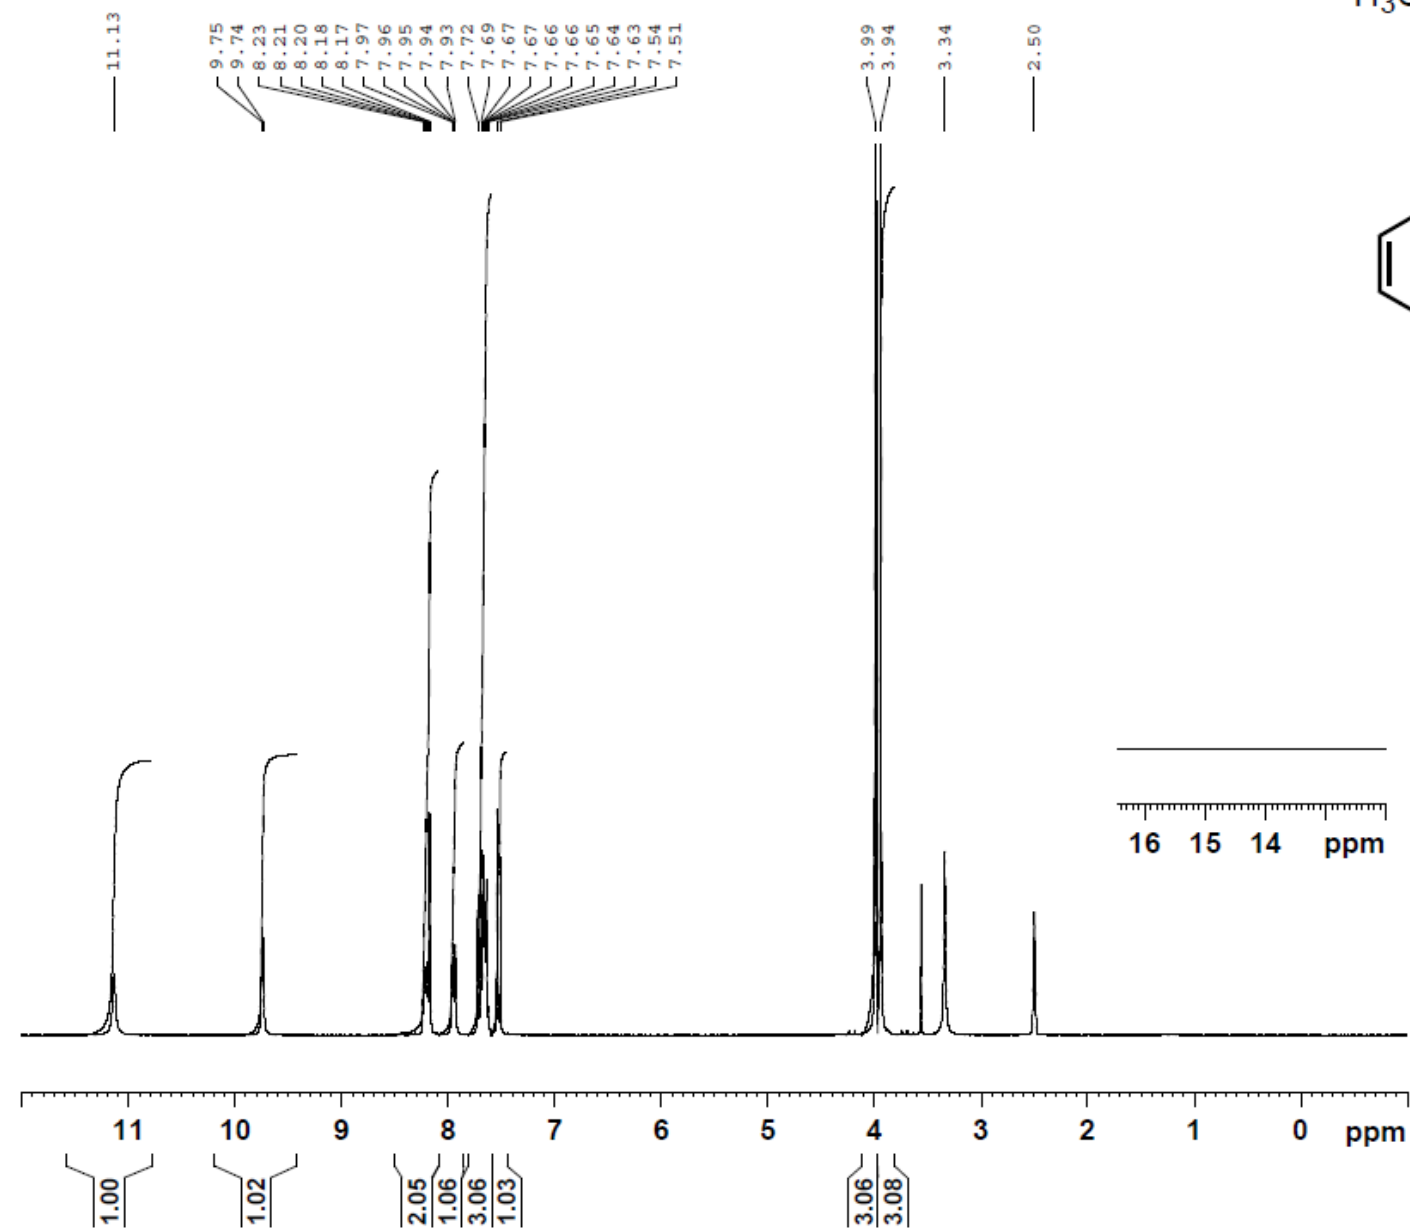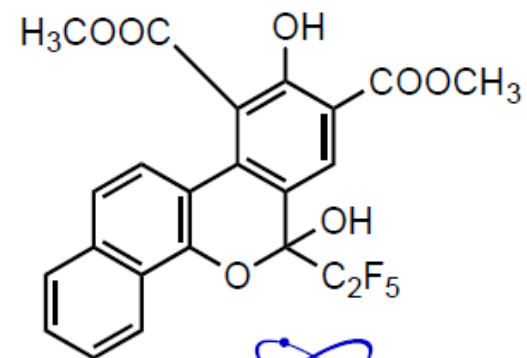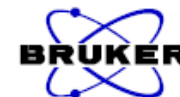

Current Data Parameters  
 NAME 110614.u317  
 EXPNO 10  
 PROCNO 1

F2 - Acquisition Parameters  
 Date\_ 20110614  
 Time 12.59  
 INSTRUM spect  
 PROBHD 5 mm PABBO BB-  
 PULPROG zg30  
 TD 65536  
 SOLVENT DMSO  
 NS 16  
 DS 2  
 SWH 6188.119 Hz  
 FIDRES 0.094423 Hz  
 AQ 5.2953587 sec  
 RG 128  
 DW 80.800 usec  
 DE 10.00 usec  
 TE 298.2 K  
 D1 1.00000000 sec  
 TD0 1

===== CHANNEL f1 =====  
 NUC1 1H  
 P1 10.00 usec  
 PL1 0.00 dB  
 PL1W 11.25325108 W  
 SFO1 300.1318534 MHz

F2 - Processing parameters  
 SI 32768  
 SF 300.130077 MHz  
 WDW EM  
 SSB 0  
 LB 0.30 Hz  
 GB 0  
 PC 1.00

Savych IS-130 13C DMSO

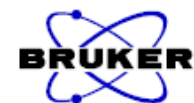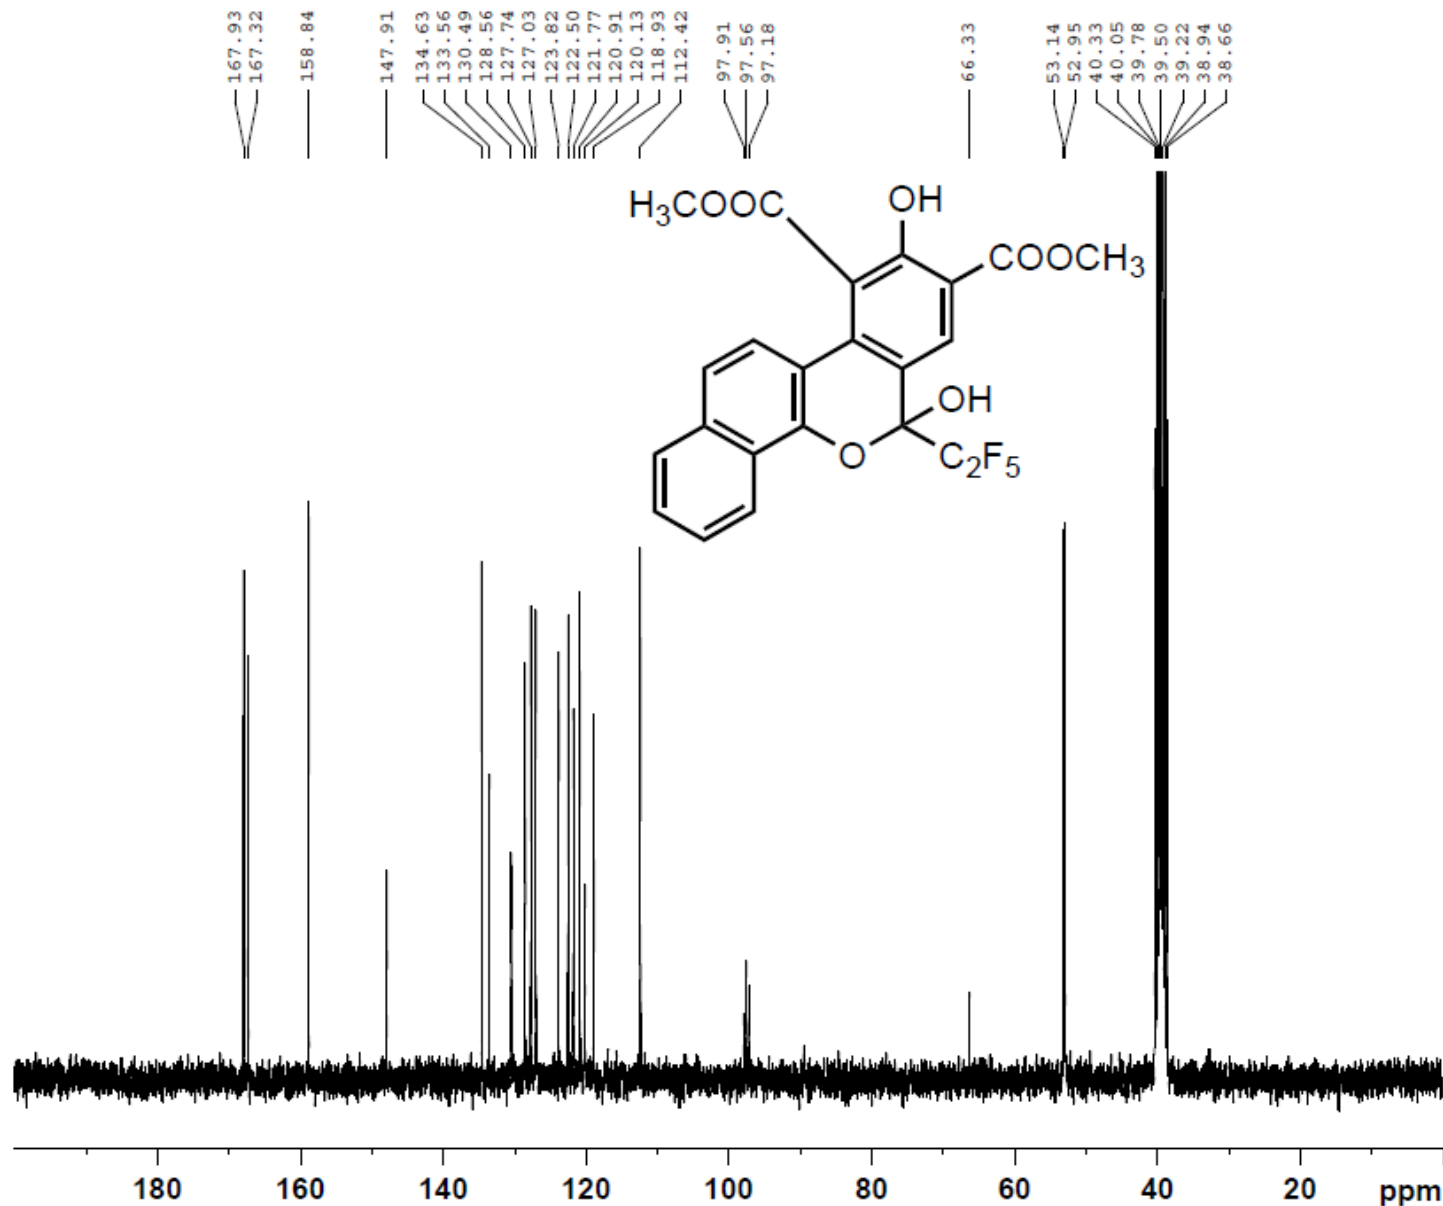

Current Data Parameters  
NAME 110614.u317 IS-130  
EXPNO 12  
PROCNO 1

F2 - Acquisition Parameters  
Date\_ 20110614  
Time 22.53  
INSTRUM spect  
PROBHD 5 mm PABBO BB-  
PULPROG zgpg30  
TD 65536  
SOLVENT DMSO  
NS 1024  
DS 4  
SWH 18028.846 Hz  
FIDRES 0.275098 Hz  
AQ 1.8175818 sec  
RG 2050  
DW 27.733 usec  
DE 10.00 usec  
TE 298.7 K  
D1 2.00000000 sec  
D11 0.03000000 sec  
TD0 1

===== CHANNEL f1 =====  
NUC1 13C  
P1 10.00 usec  
PL1 -0.50 dB  
PL1W 33.25691986 W  
SFO1 75.4752953 MHz

===== CHANNEL f2 =====  
CPDPRG2 waltz16  
NUC2 1H  
PCPD2 72.00 usec  
PL2 0.00 dB  
PL12 17.00 dB  
PL13 17.00 dB  
PL2W 11.25325108 W  
PL12W 0.22453187 W  
PL13W 0.22453187 W  
SFO2 300.1312005 MHz

F2 - Processing parameters  
SI 32768  
SF 75.4677865 MHz  
WDW EM  
SSB 0  
LB 1.00 Hz  
GB 0  
PC 1.40

Savych IS-130 19F DMSO

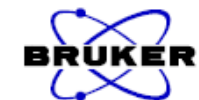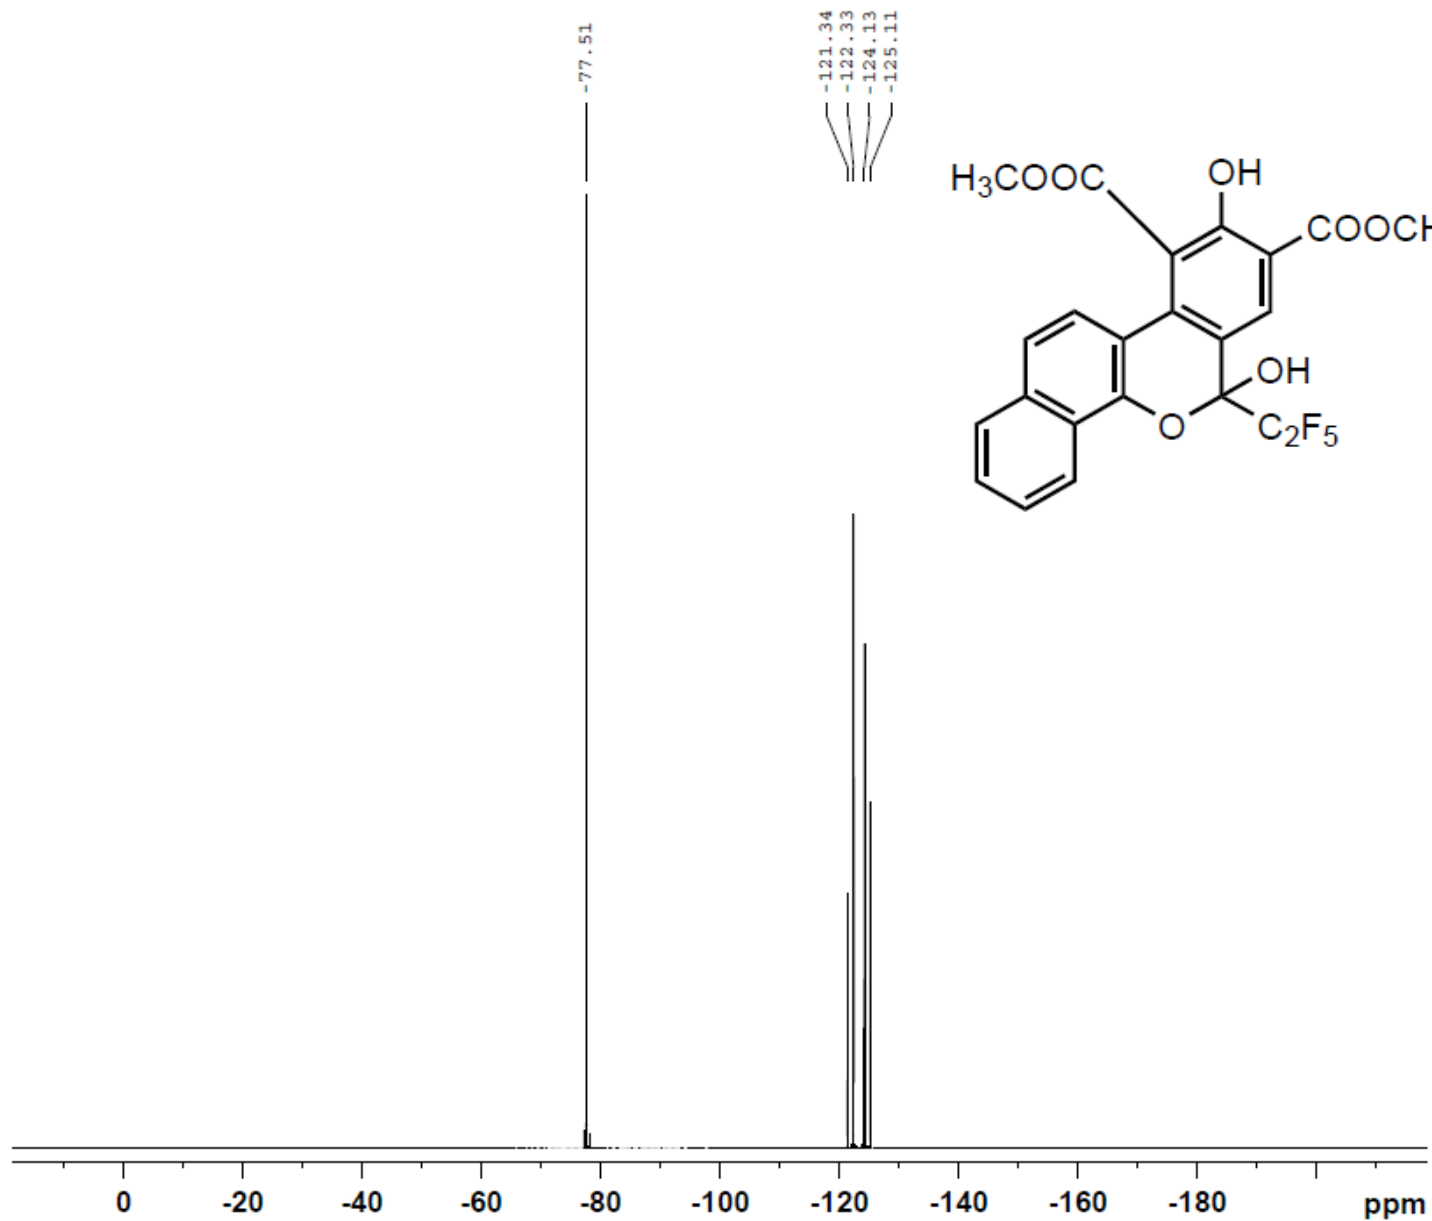

Current Data Parameters  
NAME 110614.u317 IS-130  
EXPNO 11  
PROCNO 1

F2 - Acquisition Parameters  
Date\_ 20110614  
Time 13.03  
INSTRUM spect  
PROBHD 5 mm PABBO BB-  
PULPROG zgfhigqn  
TD 131072  
SOLVENT DMSO  
NS 64  
DS 4  
SWH 66964.289 Hz  
FIDRES 0.510897 Hz  
AQ 0.9787210 sec  
RG 2050  
DW 7.467 usec  
DE 10.00 usec  
TE 298.2 K  
D1 1.00000000 sec  
D11 0.03000000 sec  
D12 0.00002000 sec  
TD0 1

===== CHANNEL f1 =====  
NUC1 19F  
P1 10.00 usec  
PL1 -3.00 dB  
PL1W 15.53680420 W  
SFO1 282.3761148 MHz

===== CHANNEL f2 =====  
CPDPRG2 waltz16  
NUC2 1H  
PCPD2 72.00 usec  
PL2 0.00 dB  
PL12 17.00 dB  
PL2W 11.25325108 W  
PL12W 0.22453187 W  
SFO2 300.1312005 MHz

F2 - Processing parameters  
SI 65536  
SF 282.4043550 MHz  
WDW EM  
SSB 0  
LB 0.30 Hz  
GB 0  
PC 1.00

Savych IS-82.1 1H DMSO/Aceton

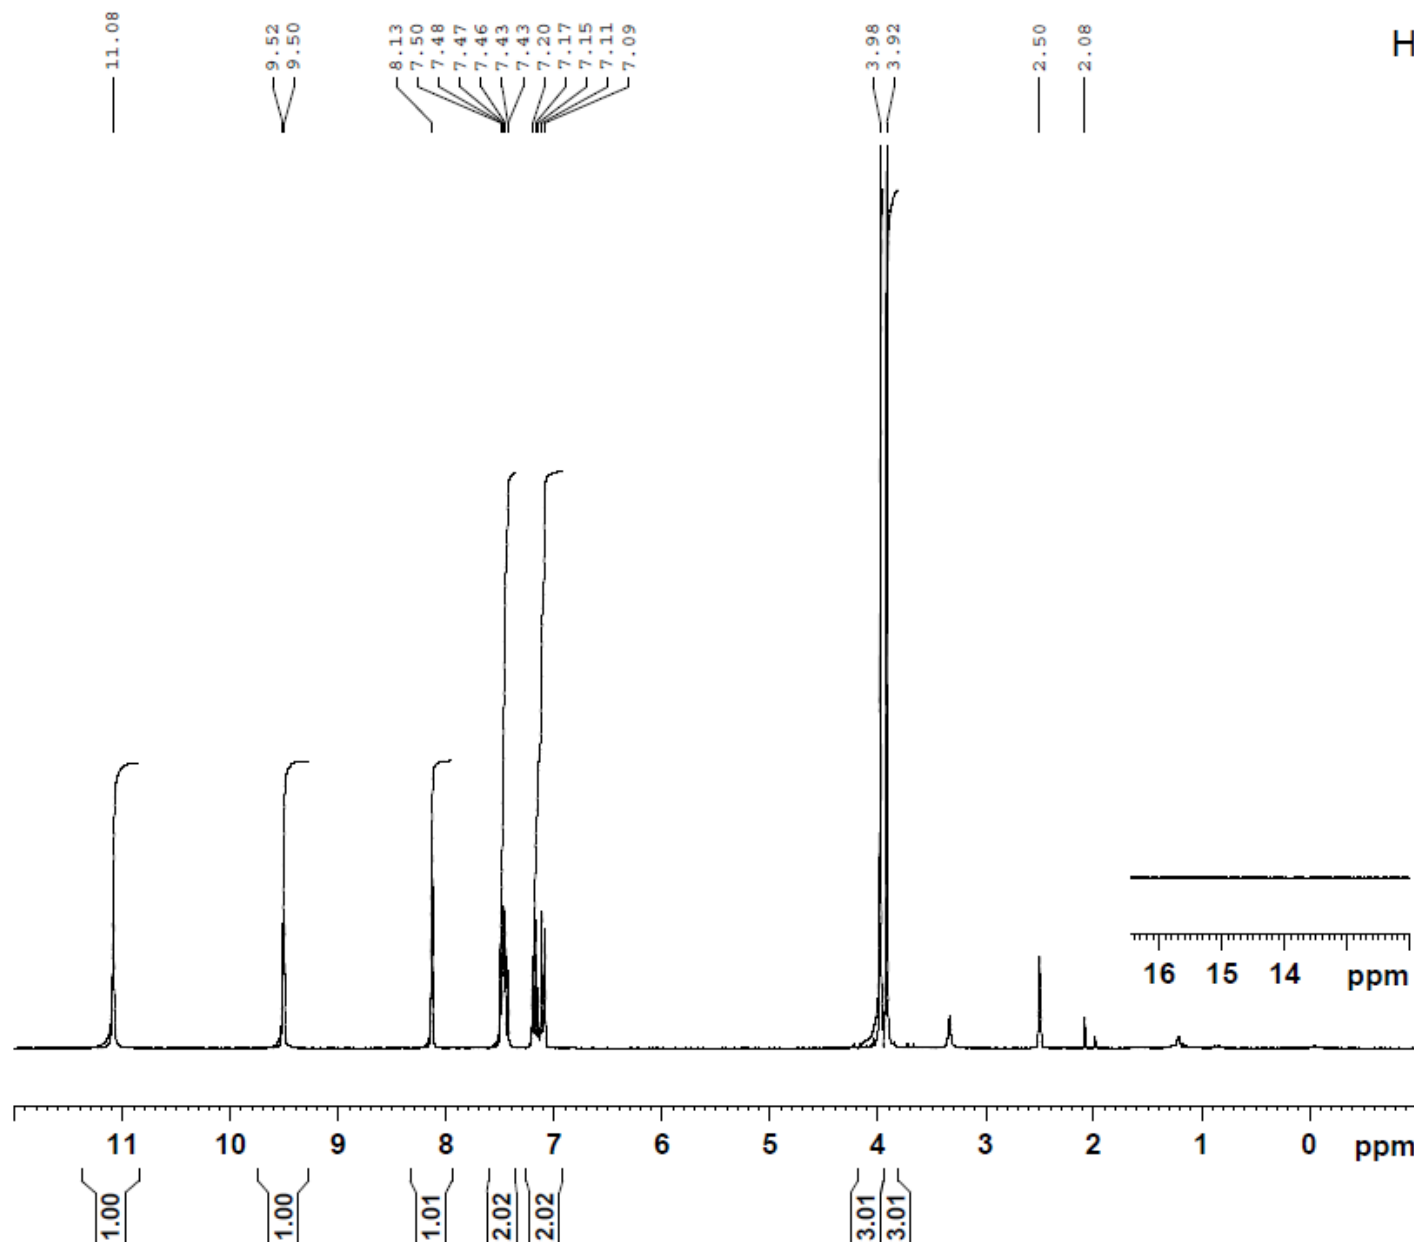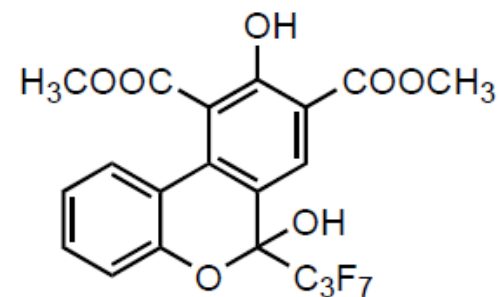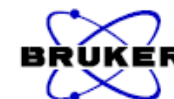

Current Data Parameters  
 NAME 110531.u319  
 EXPNO 10  
 PROCNO 1

F2 - Acquisition Parameters  
 Date\_ 20110531  
 Time 13.04  
 INSTRUM spect  
 PROBHD 5 mm PABBO BB-  
 PULPROG zg30  
 TD 65536  
 SOLVENT DMSO  
 NS 16  
 DS 2  
 SWH 6188.119 Hz  
 FIDRES 0.094423 Hz  
 AQ 5.2953587 sec  
 RG 128  
 DW 80.800 usec  
 DE 10.00 usec  
 TE 298.2 K  
 D1 1.00000000 sec  
 TD0 1

===== CHANNEL f1 =====  
 NUC1 1H  
 P1 10.00 usec  
 PL1 0.00 dB  
 PL1W 11.25325108 W  
 SFO1 300.1318534 MHz

F2 - Processing parameters  
 SI 32768  
 SF 300.1300073 MHz  
 WDW EM  
 SSB 0  
 LB 0.30 Hz  
 GB 0  
 PC 1.00

Savych IS-82.1 13C DMSO/Aceton

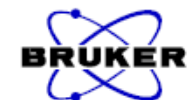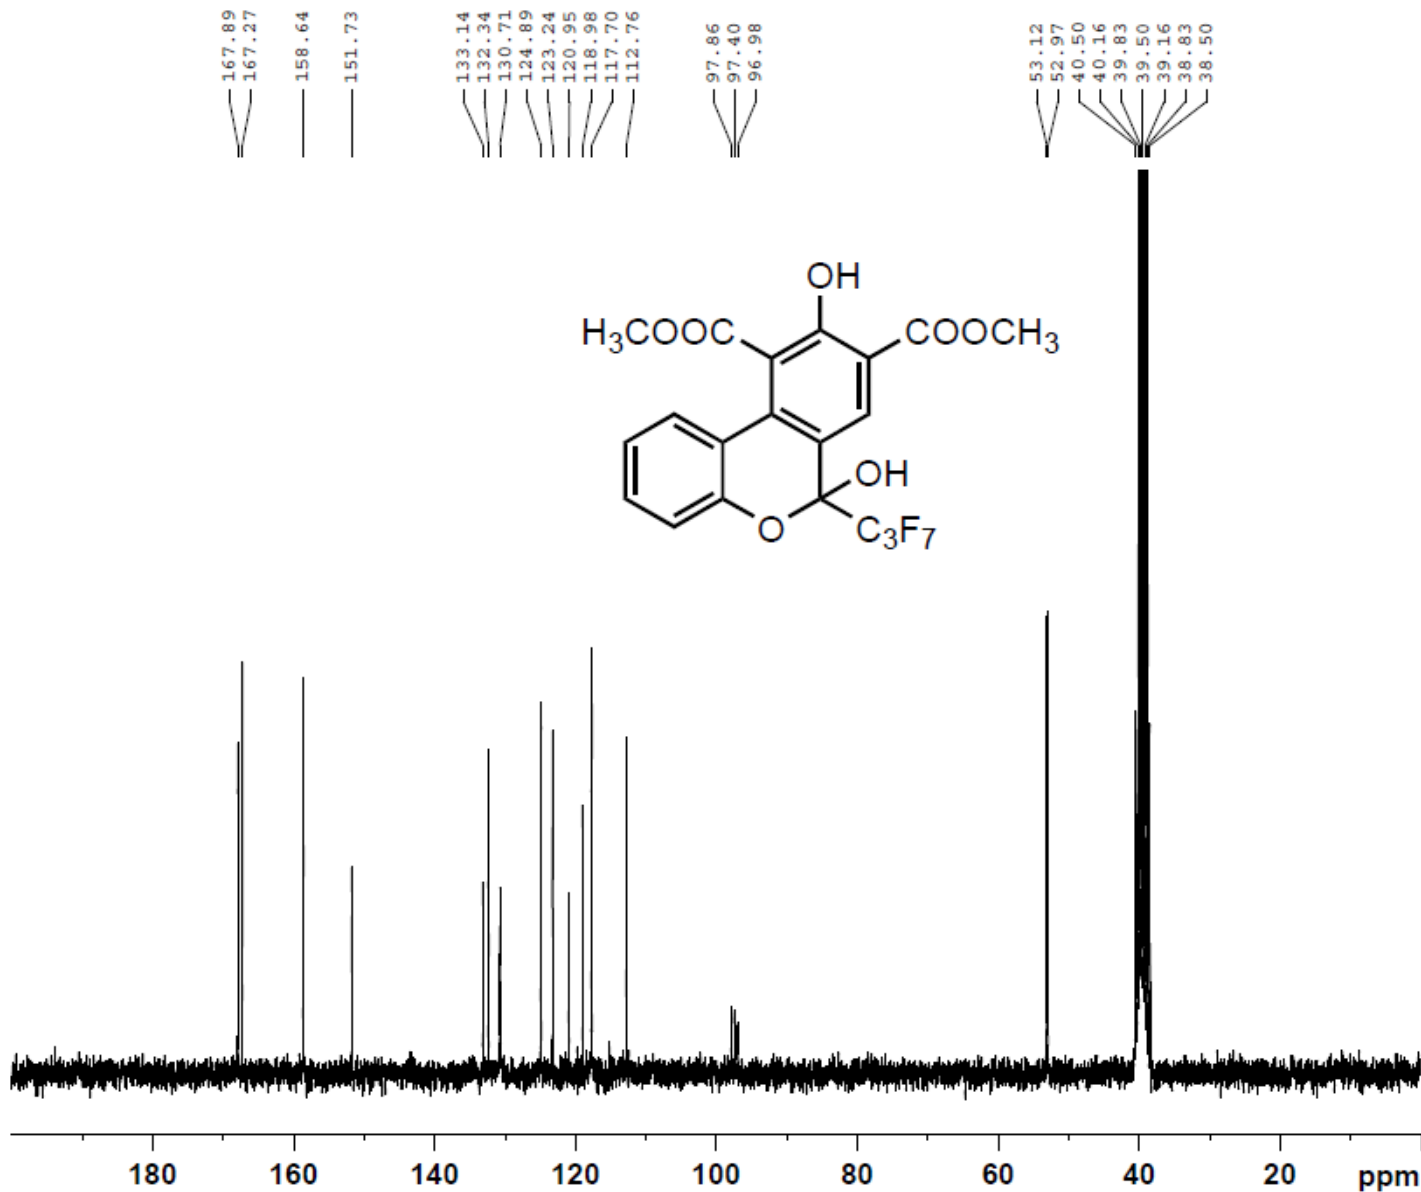

Current Data Parameters  
NAME 110601.208  
EXPNO 10  
PROCNO 1

F2 - Acquisition Parameters  
Date\_ 20110601  
Time 19.53  
INSTRUM spect  
PROBHD 5 mm PABBO BB-  
PULPROG zgpg30  
TD 65536  
SOLVENT DMSO  
NS 1024  
DS 4  
SWH 15000.000 Hz  
FIDRES 0.228882 Hz  
AQ 2.1845834 sec  
RG 2050  
DW 33.333 usec  
DE 10.00 usec  
TE 298.7 K  
D1 2.00000000 sec  
d11 0.03000000 sec  
DELTA 1.89999998 sec  
TD0 1

===== CHANNEL f1 =====  
NUC1 13C  
P1 10.00 usec  
PL1 -1.00 dB  
SFO1 62.9015280 MHz

===== CHANNEL f2 =====  
CPDPRG2 waltz16  
NUC2 1H  
PCPD2 70.00 usec  
PL12 15.00 dB  
PL13 15.00 dB  
PL2 -2.50 dB  
SFO2 250.1310005 MHz

F2 - Processing parameters  
SI 32768  
SF 62.8952678 MHz  
WDW EM  
SSB 0  
LB 1.00 Hz  
GB 0  
PC 1.40

Savych IS-82.1 19F DMSO/Aceton

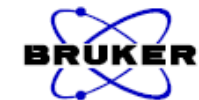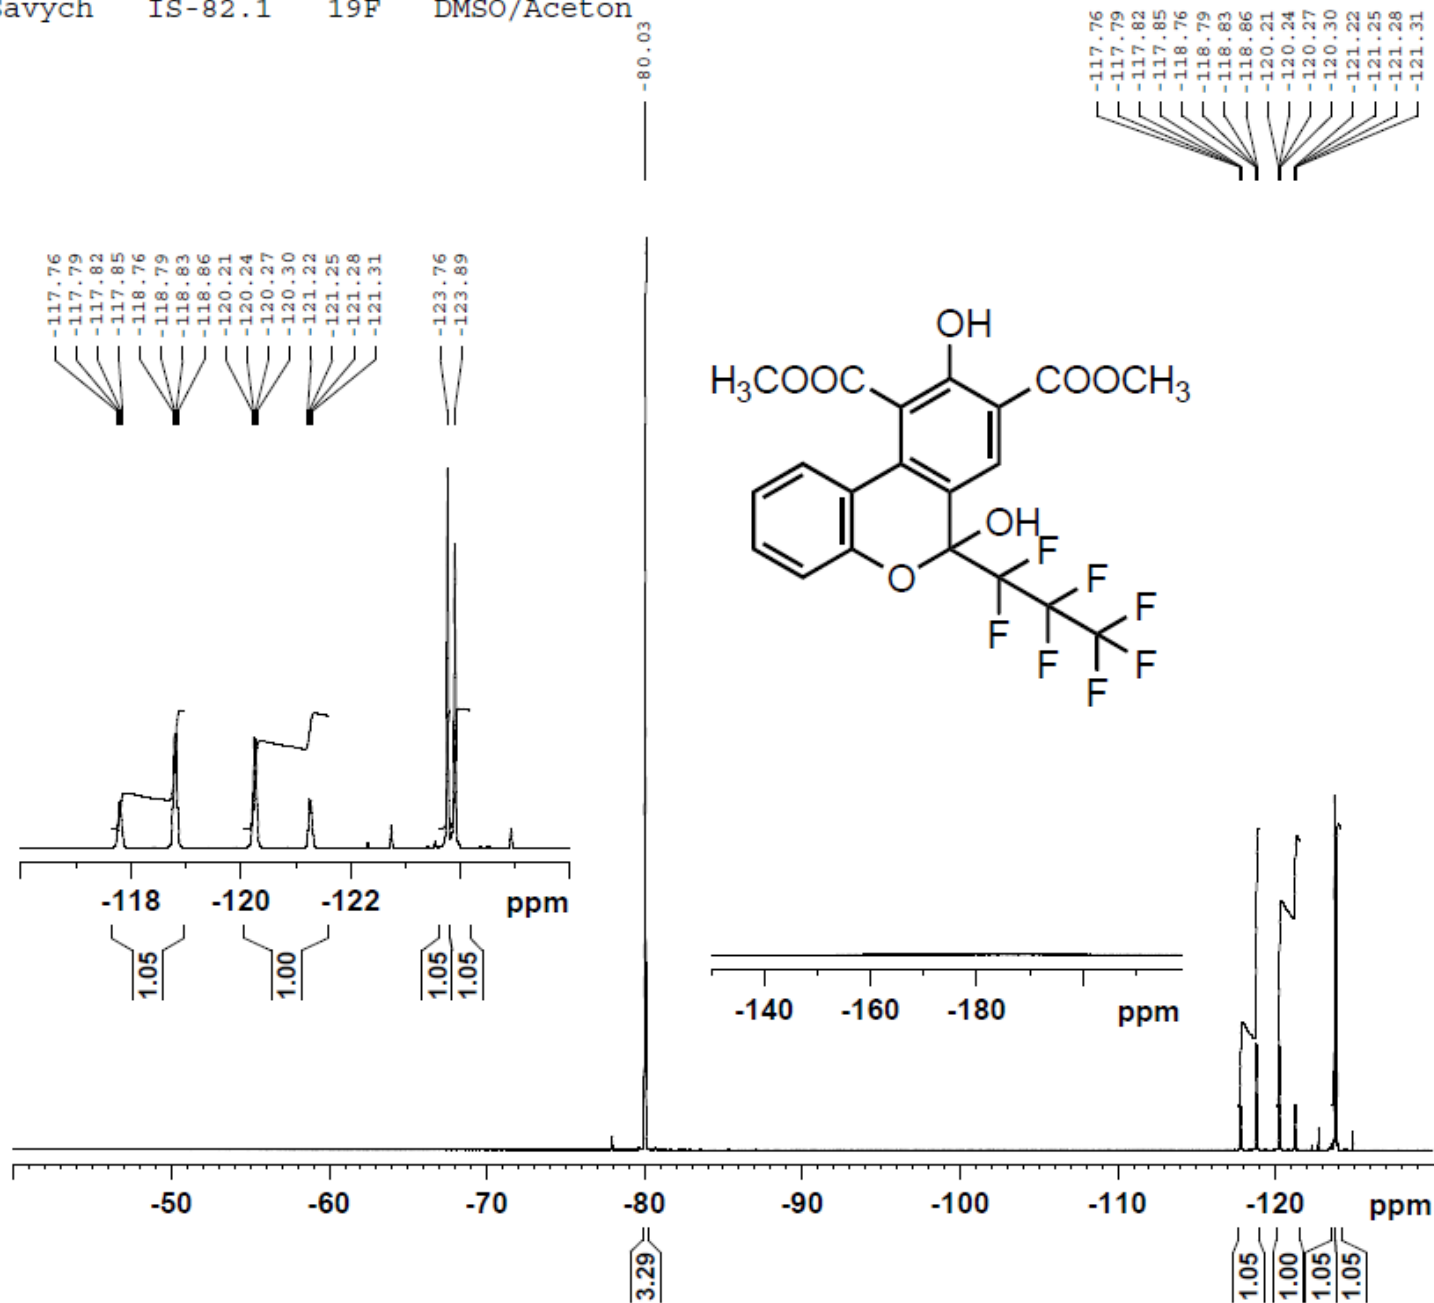

Current Data Parameters  
 NAME 110531.u319  
 EXPNO 11  
 PROCNO 1

F2 - Acquisition Parameters  
 Date\_ 20110531  
 Time 13.07  
 INSTRUM spect  
 PROBHD 5 mm PABBO BB-  
 PULPROG zgfhigqn  
 TD 131072  
 SOLVENT DMSO  
 NS 48  
 DS 4  
 SWH 66964.289 Hz  
 FIDRES 0.510897 Hz  
 AQ 0.9787210 sec  
 RG 1440  
 DW 7.467 usec  
 DE 10.00 usec  
 TE 298.4 K  
 D1 1.00000000 sec  
 D11 0.03000000 sec  
 D12 0.00002000 sec  
 TD0 1

===== CHANNEL f1 =====  
 NUC1 19F  
 P1 10.00 usec  
 PL1 -3.00 dB  
 PL1W 15.53680420 W  
 SFO1 282.3761148 MHz

===== CHANNEL f2 =====  
 CPDPRG2 waltz16  
 NUC2 1H  
 PCPD2 72.00 usec  
 PL2 0.00 dB  
 PL12 17.00 dB  
 PL2W 11.25325108 W  
 PL12W 0.22453187 W  
 SFO2 300.1312005 MHz

F2 - Processing parameters  
 SI 65536  
 SF 282.4043550 MHz  
 WDW EM  
 SSB 0  
 LB 0.30 Hz  
 GB 0  
 PC 1.00

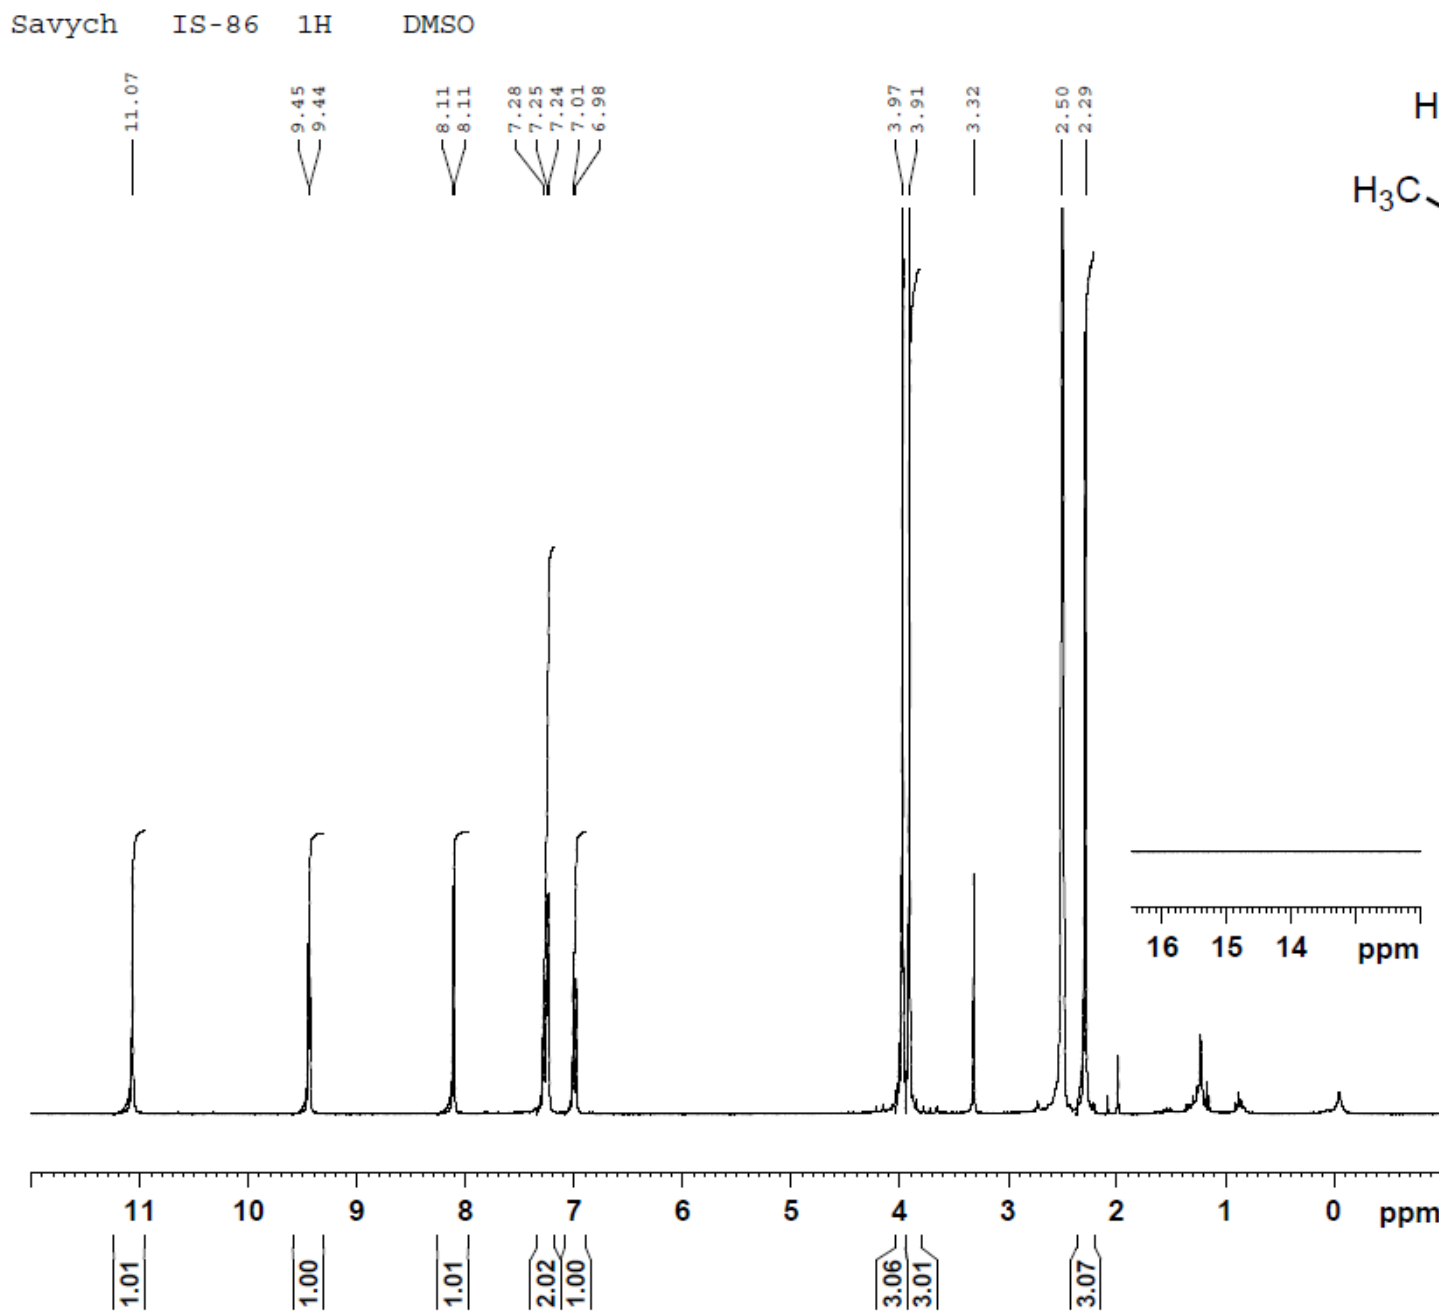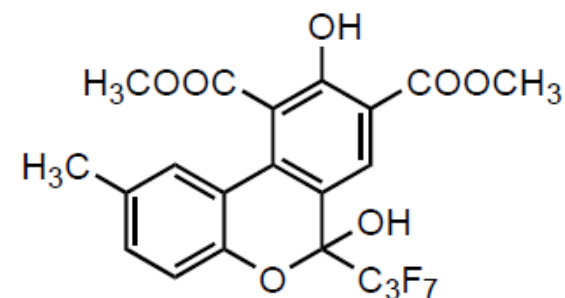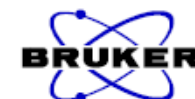

Current Data Parameters  
 NAME 110408.u317 IS-86.1  
 EXPNO 10  
 PROCNO 1

F2 - Acquisition Parameters  
 Date\_ 20110408  
 Time 12.42  
 INSTRUM spect  
 PROBHD 5 mm PABBO BB-  
 PULPROG zg30  
 TD 65536  
 SOLVENT DMSO  
 NS 16  
 DS 2  
 SWH 6188.119 Hz  
 FIDRES 0.094423 Hz  
 AQ 5.2953587 sec  
 RG 144  
 DW 80.800 usec  
 DE 10.00 usec  
 TE 298.2 K  
 D1 1.00000000 sec  
 TD0 1

----- CHANNEL f1 -----  
 NUC1 1H  
 P1 10.00 usec  
 PL1 0.00 dB  
 PL1W 11.25325108 W  
 SFO1 300.1318534 MHz

F2 - Processing parameters  
 SI 32768  
 SF 300.1300064 MHz  
 WDW EM  
 SSB 0  
 LB 0.30 Hz  
 GB 0  
 PC 1.00

Savych IS-86.2 13C CDCl3

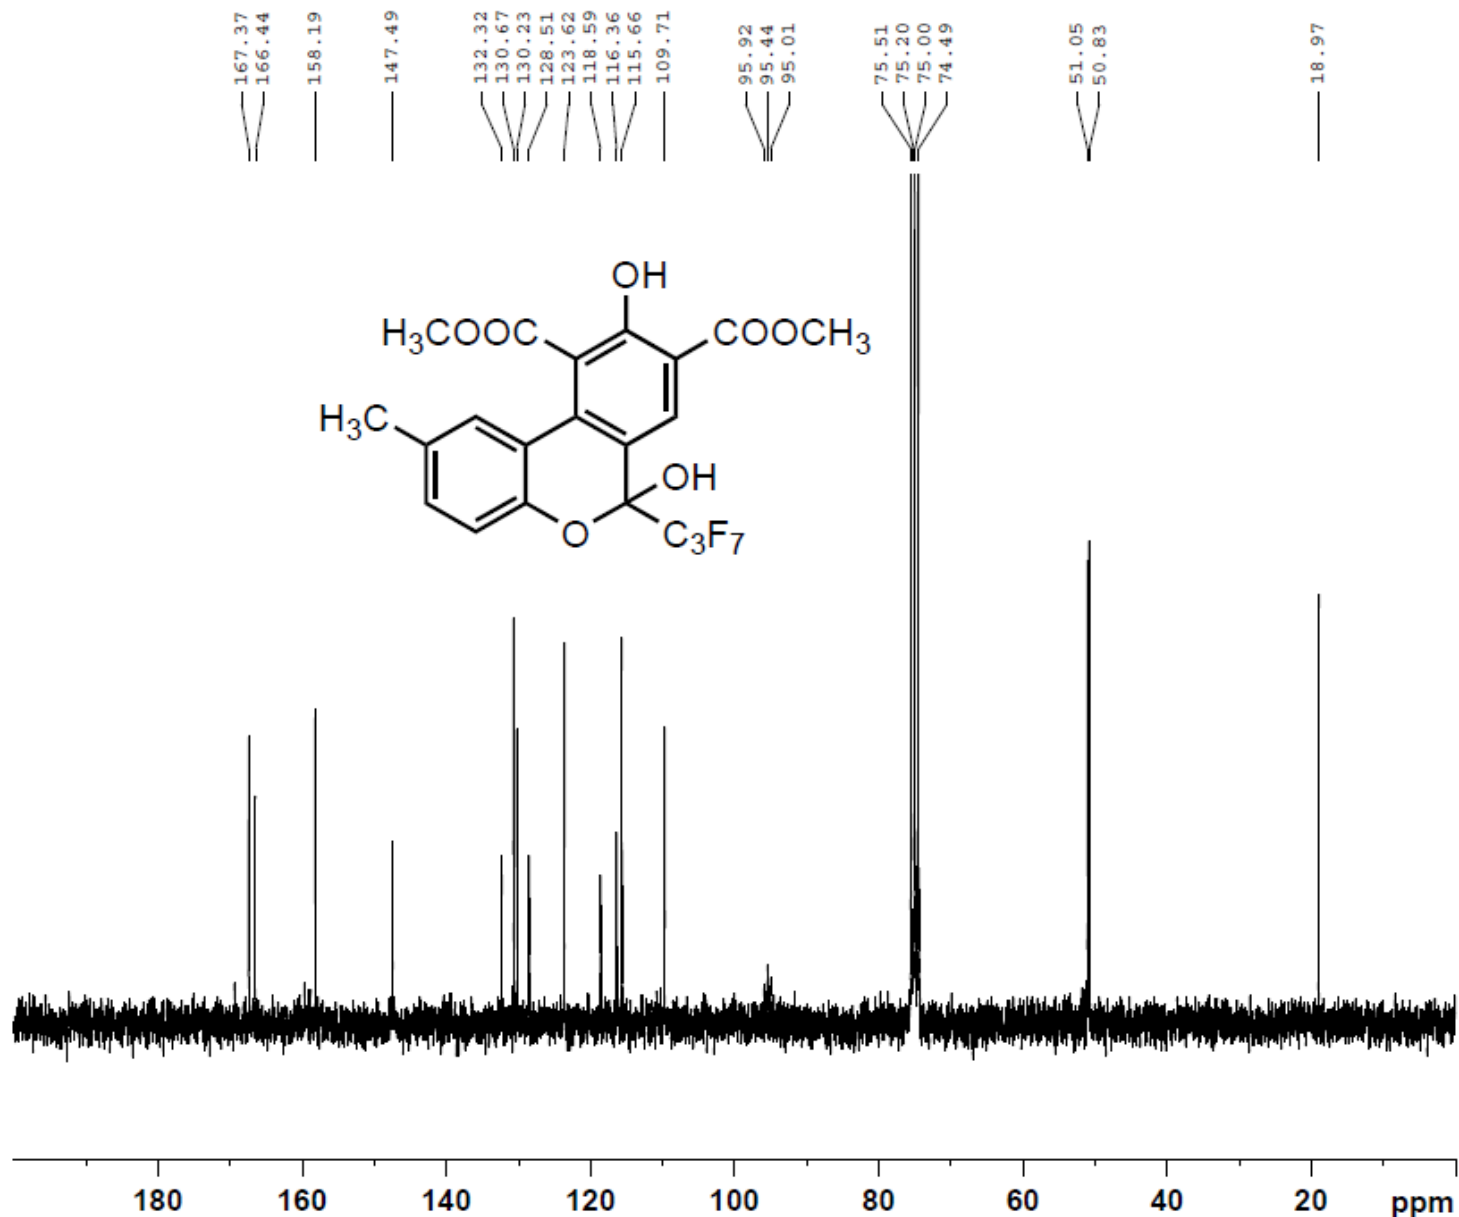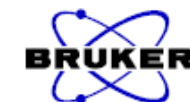

Current Data Parameters  
NAME 110412.204  
EXPNO 10  
PROCNO 1

F2 - Acquisition Parameters  
Date\_ 20110412  
Time 21.13  
INSTRUM spect  
PROBHD 5 mm PABBO BB-  
PULPROG zgpg30  
TD 65536  
SOLVENT CDCl3  
NS 768  
DS 4  
SWH 15000.000 Hz  
FIDRES 0.228882 Hz  
AQ 2.1845834 sec  
RG 2050  
DW 33.333 usec  
DE 10.00 usec  
TE 298.2 K  
D1 2.0000000 sec  
d11 0.0300000 sec  
DELTA 1.89999998 sec  
TD0 1

===== CHANNEL f1 =====  
NUC1 13C  
P1 10.00 usec  
PL1 -1.00 dB  
SFO1 62.9015280 MHz

===== CHANNEL f2 =====  
CPDPRG2 waltz16  
NUC2 1H  
PCPD2 70.00 usec  
PL12 15.00 dB  
PL13 15.00 dB  
PL2 -2.50 dB  
SFO2 250.1310005 MHz

F2 - Processing parameters  
SI 32768  
SF 62.8953641 MHz  
WDW EM  
SSB 0  
LB 1.00 Hz  
GB 0  
PC 1.40



Savych IS-86 19F DMSO

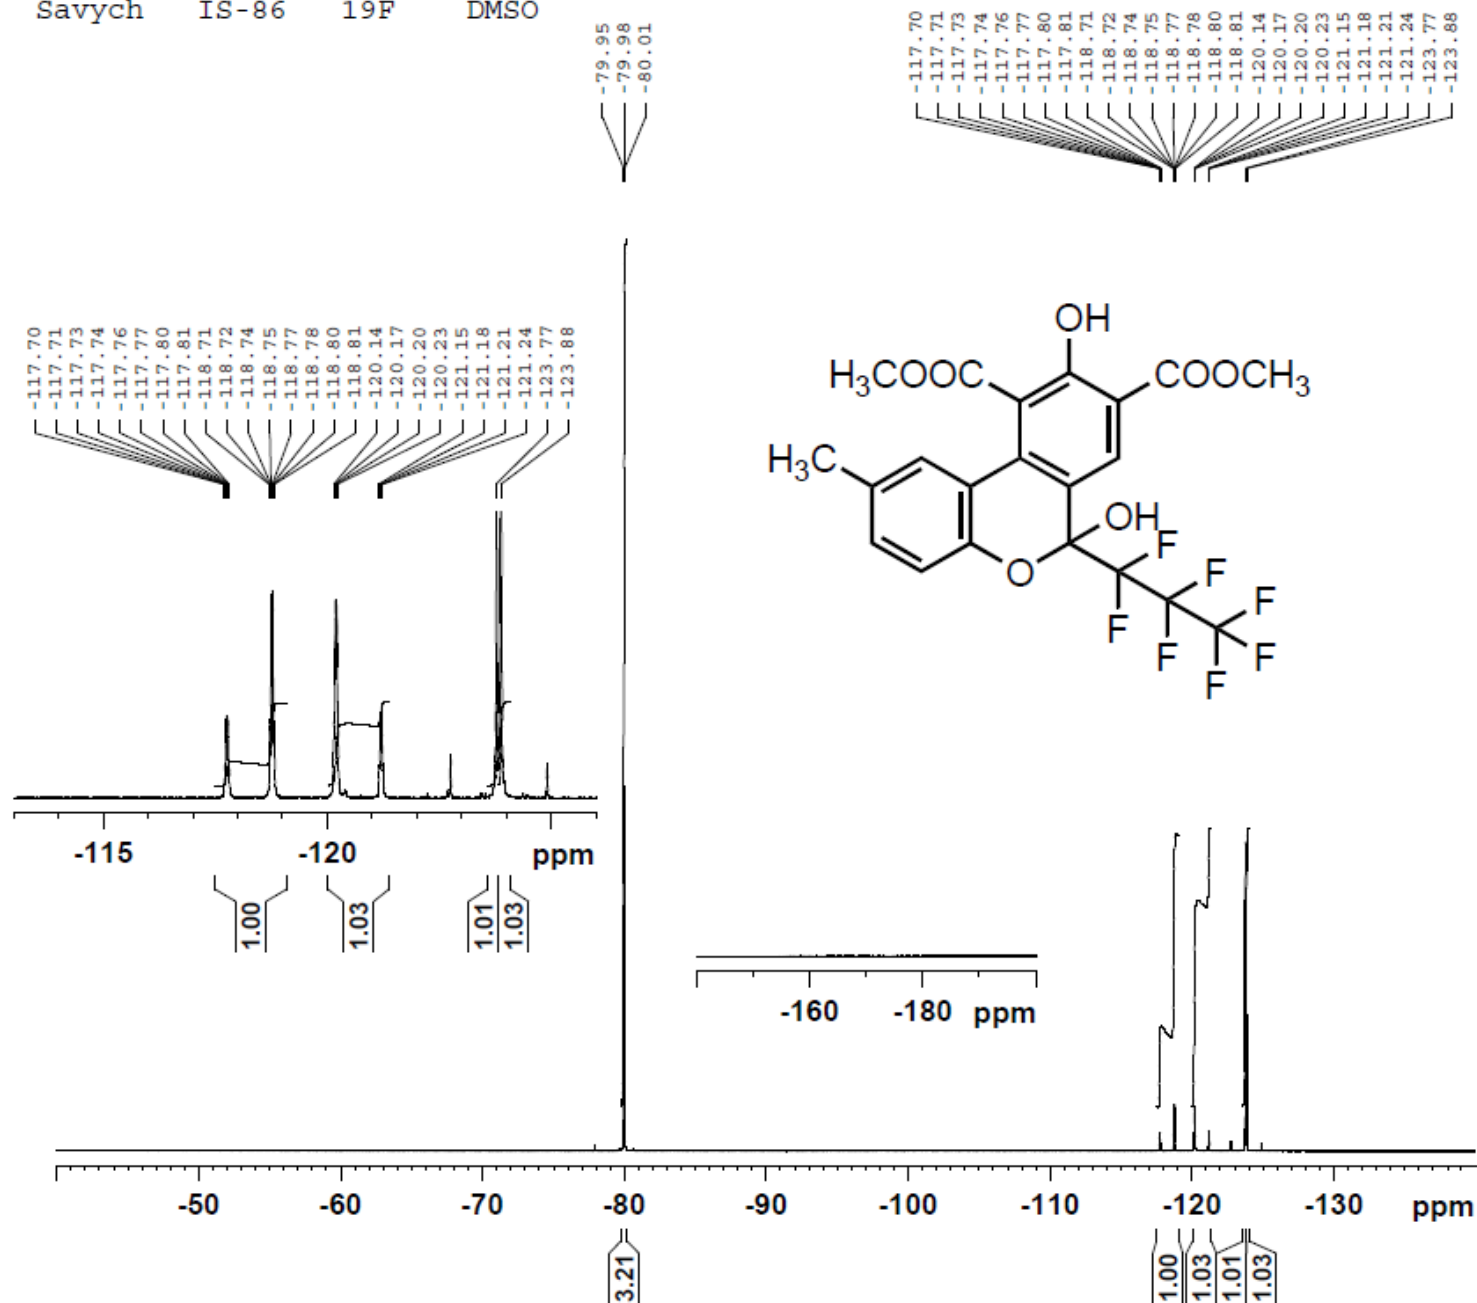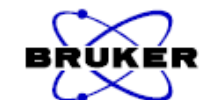

Current Data Parameters  
 NAME 110408.u317 IS-86.1  
 EXPNO 11  
 PROCNO 1

F2 - Acquisition Parameters  
 Date\_ 20110408  
 Time 12.46  
 INSTRUM spect  
 PROBHD 5 mm PABBO BB-  
 PULPROG zgfhigqn  
 TD 131072  
 SOLVENT DMSO  
 NS 48  
 DS 4  
 SWH 66964.289 Hz  
 FIDRES 0.510897 Hz  
 AQ 0.9787210 sec  
 RG 2050  
 DW 7.467 usec  
 DE 10.00 usec  
 TE 298.2 K  
 D1 1.00000000 sec  
 D11 0.03000000 sec  
 D12 0.00002000 sec  
 TD0 1

===== CHANNEL f1 =====  
 NUC1 19F  
 P1 10.00 usec  
 PL1 -3.00 dB  
 PL1W 15.53680420 W  
 SFO1 282.3761148 MHz

===== CHANNEL f2 =====  
 CPDPRG2 waltz16  
 NUC2 1H  
 PCPD2 72.00 usec  
 PL2 0.00 dB  
 PL12 17.00 dB  
 PL2W 11.25325108 W  
 PL12W 0.22453187 W  
 SFO2 300.1312005 MHz

F2 - Processing parameters  
 SI 65536  
 SF 282.4043550 MHz  
 WDW EM  
 SSB 0  
 LB 0.30 Hz  
 GB 0  
 PC 1.00

Savych IS-87 1H DMSO

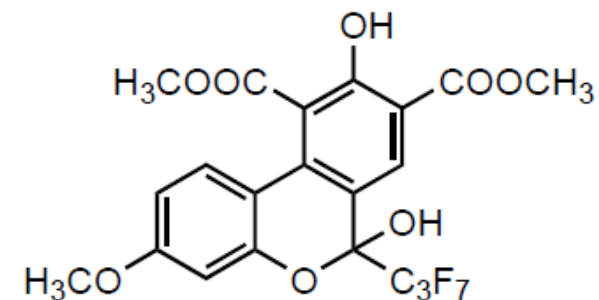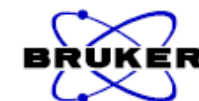

Current Data Parameters  
NAME 110608.u313 IS-87  
EXPNO 10  
PROCNO 1

F2 - Acquisition Parameters  
Date\_ 20110608  
Time 12.13  
INSTRUM spect  
PROBHD 5 mm PABBO BB-  
PULPROG zg30  
TD 65536  
SOLVENT DMSO  
NS 16  
DS 2  
SWH 6188.119 Hz  
FIDRES 0.094423 Hz  
AQ 5.2953587 sec  
RG 101  
DW 80.800 usec  
DE 10.00 usec  
TE 298.3 K  
D1 1.00000000 sec  
TD0 1

===== CHANNEL f1 =====  
NUC1 1H  
P1 10.00 usec  
PL1 0.00 dB  
PL1W 11.25325108 W  
SFO1 300.1318534 MHz

F2 - Processing parameters  
SI 32768  
SF 300.1300138 MHz  
WDW EM  
SSB 0  
LB 0.30 Hz  
GB 0  
PC 1.00

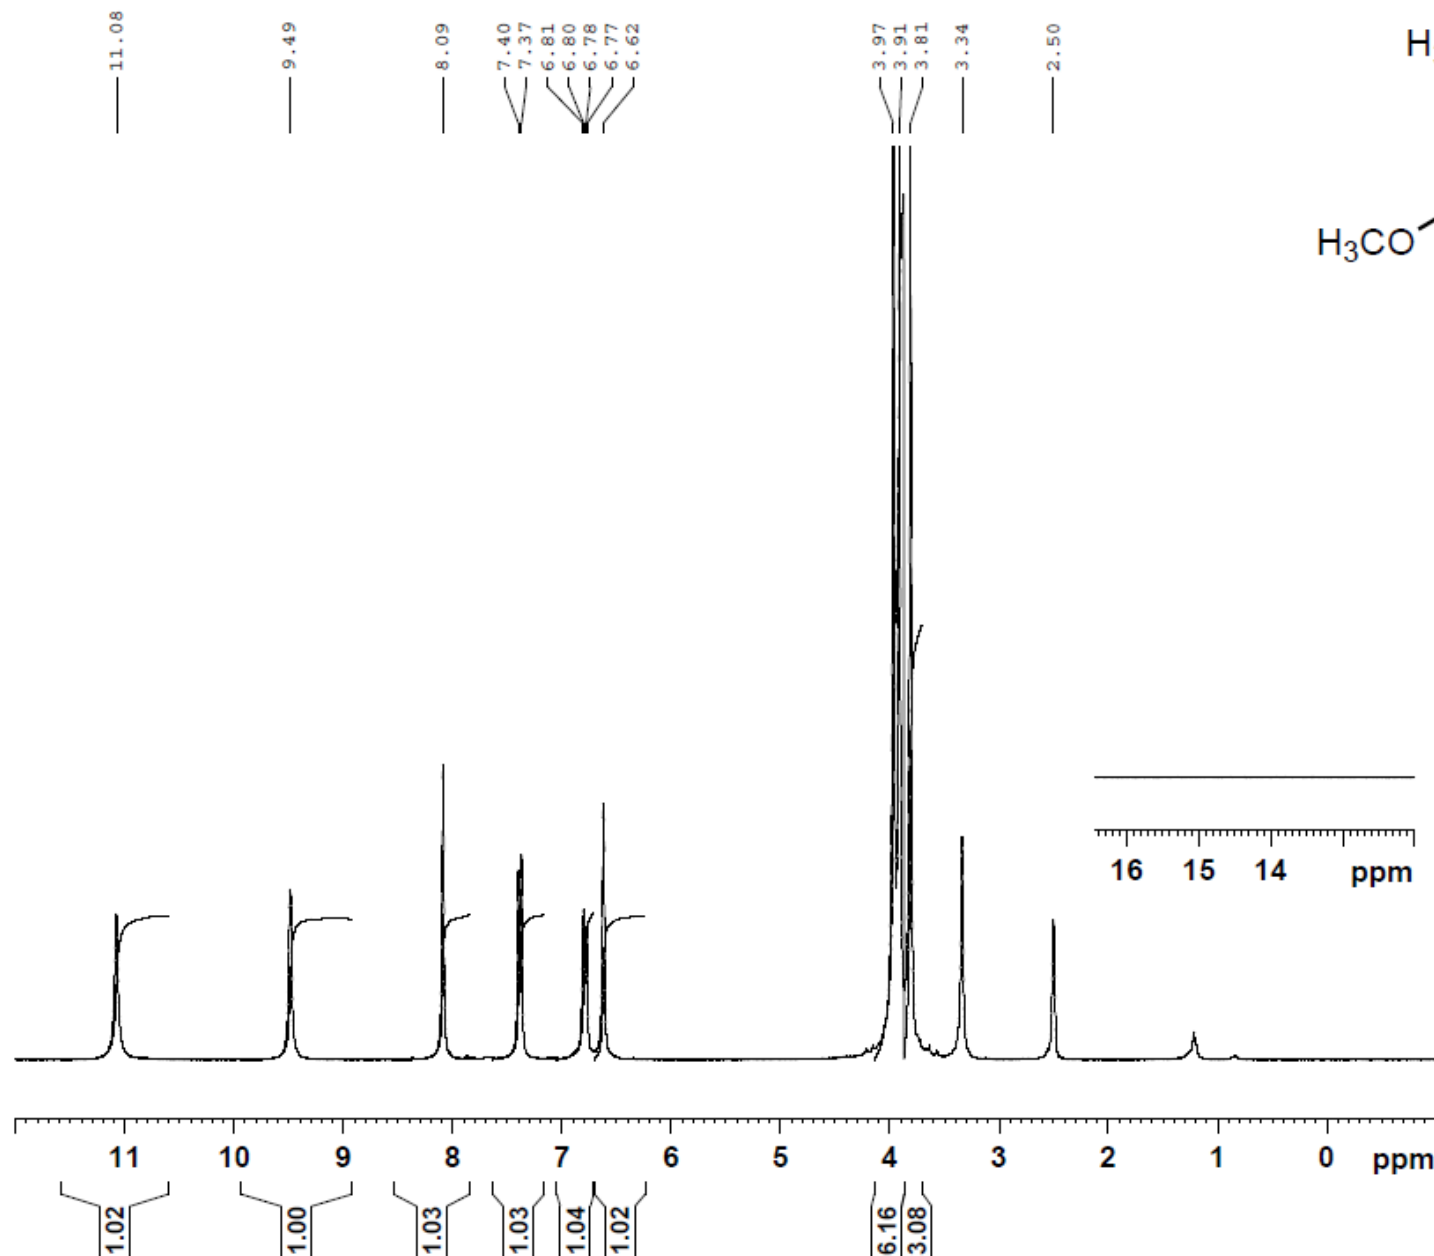

Savych IS-87 13C DMSO

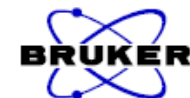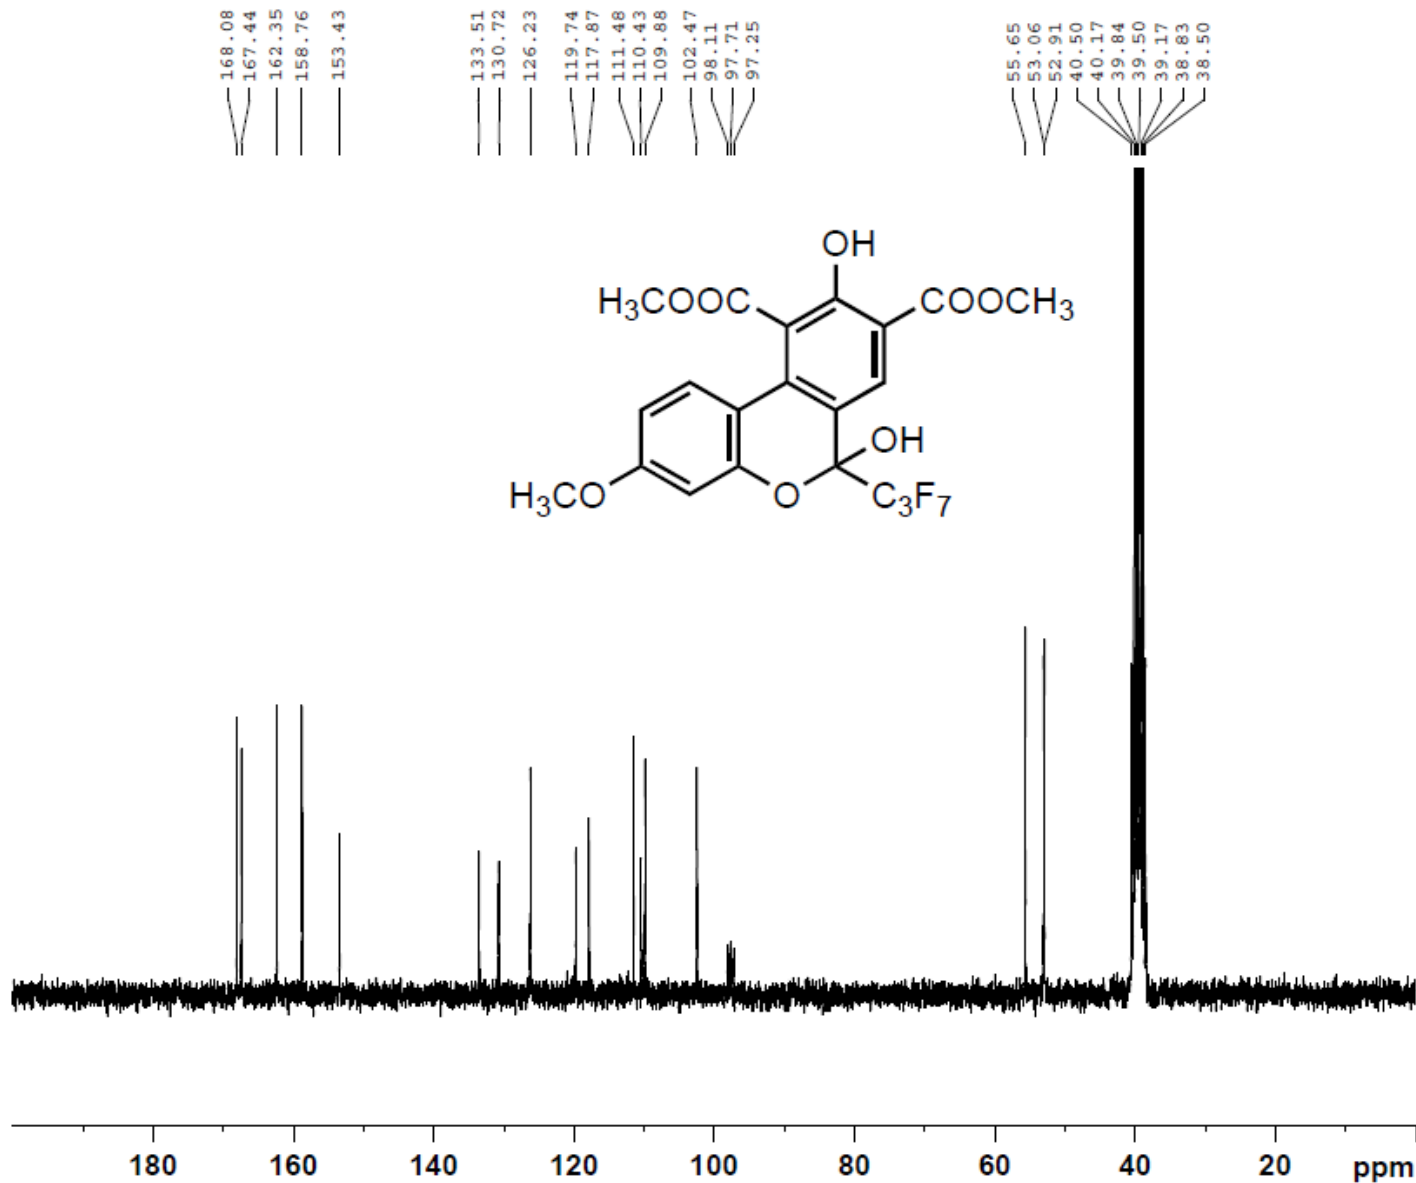

Current Data Parameters  
NAME 110608.207  
EXPNO 10  
PROCNO 1

F2 - Acquisition Parameters  
Date\_ 20110608  
Time 22.03  
INSTRUM spect  
PROBHD 5 mm PABBO BB-  
PULPROG zgpg30  
TD 65536  
SOLVENT DMSO  
NS 1024  
DS 4  
SWH 15000.000 Hz  
FIDRES 0.228882 Hz  
AQ 2.1845834 sec  
RG 2050  
DW 33.333 usec  
DE 10.00 usec  
TE 298.5 K  
D1 2.00000000 sec  
d11 0.03000000 sec  
DELTA 1.89999998 sec  
TD0 1

===== CHANNEL f1 =====  
NUC1 13C  
P1 10.00 usec  
PL1 -1.00 dB  
SFO1 62.9015280 MHz

===== CHANNEL f2 =====  
CPDPRG2 waltz16  
NUC2 1H  
PCPD2 70.00 usec  
PL12 15.00 dB  
PL13 15.00 dB  
PL2 -2.50 dB  
SFO2 250.1310005 MHz

F2 - Processing parameters  
SI 32768  
SF 62.8952674 MHz  
WDW EM  
SSB 0  
LB 1.00 Hz  
GB 0  
PC 1.40

Savych IS-87 19F DMSO

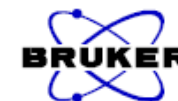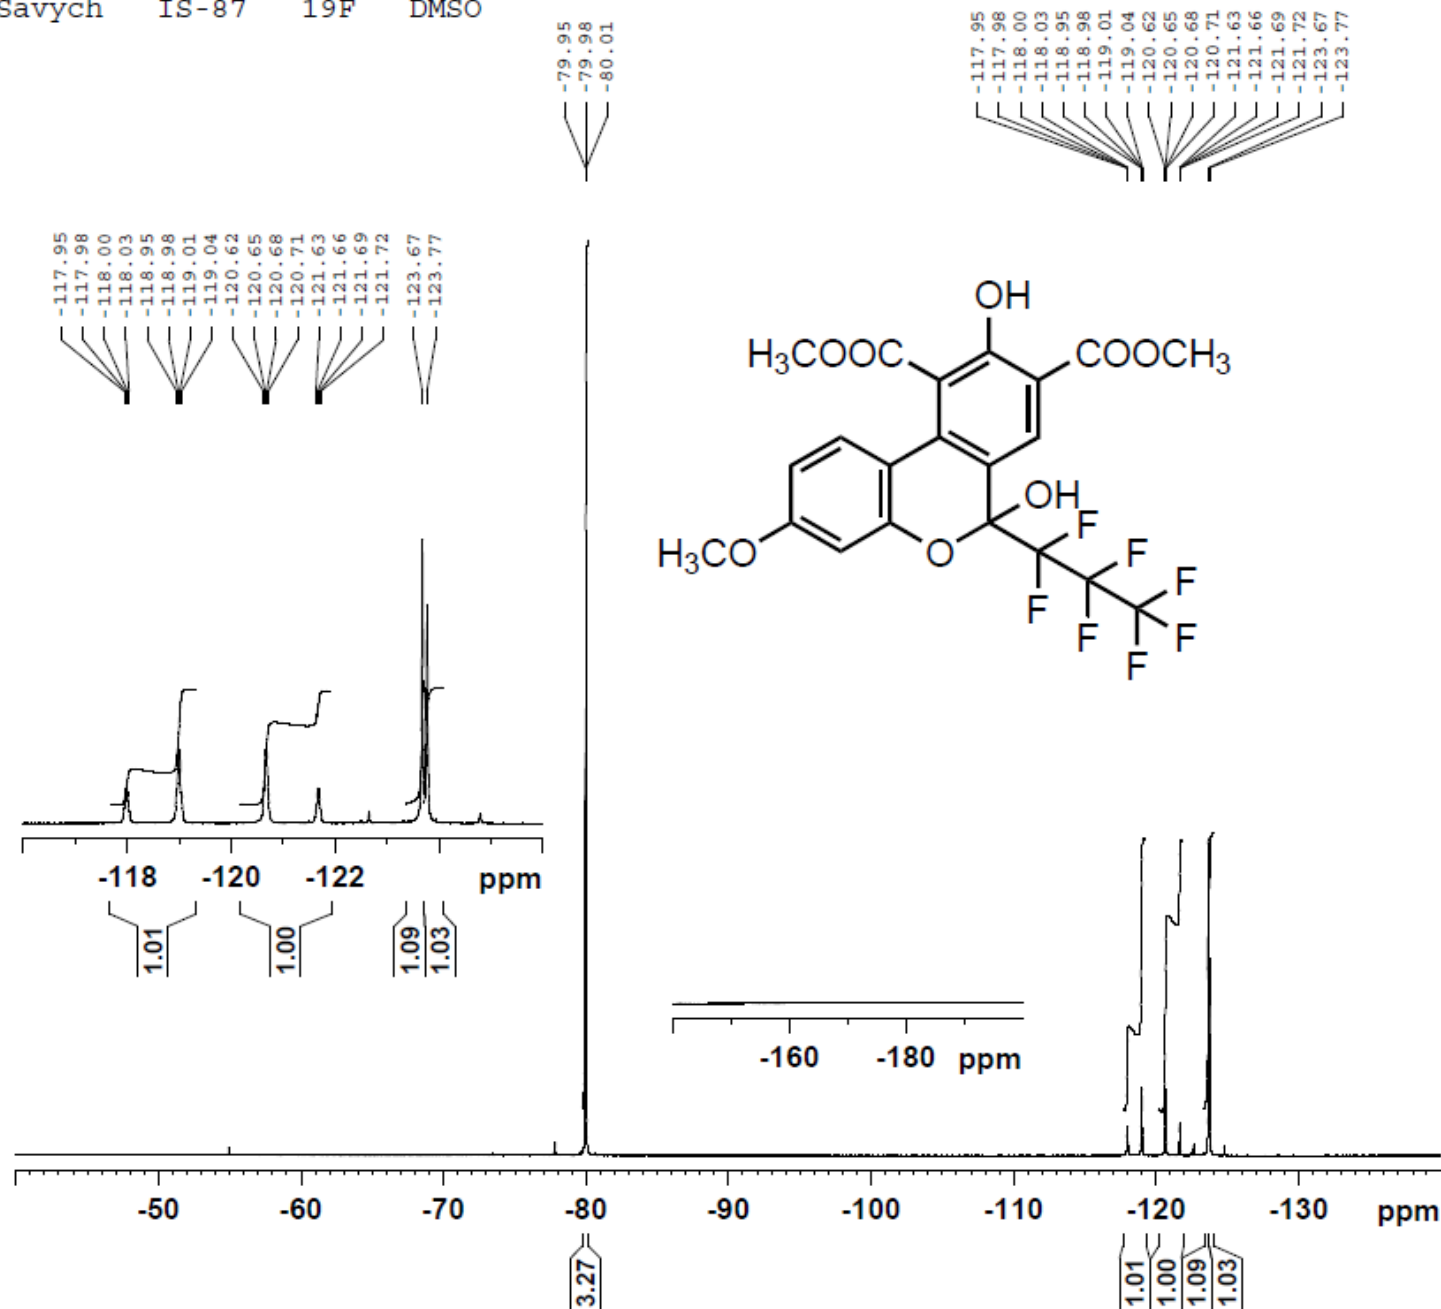

Current Data Parameters  
 NAME 110608.u313 IS-87  
 EXPNO 11  
 PROCNO 1

F2 - Acquisition Parameters  
 Date\_ 20110608  
 Time 12.17  
 INSTRUM spect  
 PROBHD 5 mm PABBO BB-  
 PULPROG zgfgigqn  
 TD 131072  
 SOLVENT DMSO  
 NS 48  
 DS 4  
 SWH 66964.289 Hz  
 FIDRES 0.510897 Hz  
 AQ 0.9787210 sec  
 RG 1150  
 DW 7.467 usec  
 DE 10.00 usec  
 TE 298.6 K  
 D1 1.00000000 sec  
 D11 0.03000000 sec  
 D12 0.00002000 sec  
 TD0 1

===== CHANNEL f1 =====  
 NUC1 19F  
 P1 10.00 usec  
 PL1 -3.00 dB  
 PL1W 15.53680420 W  
 SFO1 282.3761148 MHz

===== CHANNEL f2 =====  
 CPDPRG2 waltz16  
 NUC2 1H  
 PCPD2 72.00 usec  
 PL2 0.00 dB  
 PL12 17.00 dB  
 PL2W 11.25325108 W  
 PL12W 0.22453187 W  
 SFO2 300.1312005 MHz

F2 - Processing parameters  
 SI 65536  
 SF 282.4043550 MHz  
 WDW EM  
 SSB 0  
 LB 0.30 Hz  
 GB 0  
 PC 1.00

Savych IS-126 1H DMSO

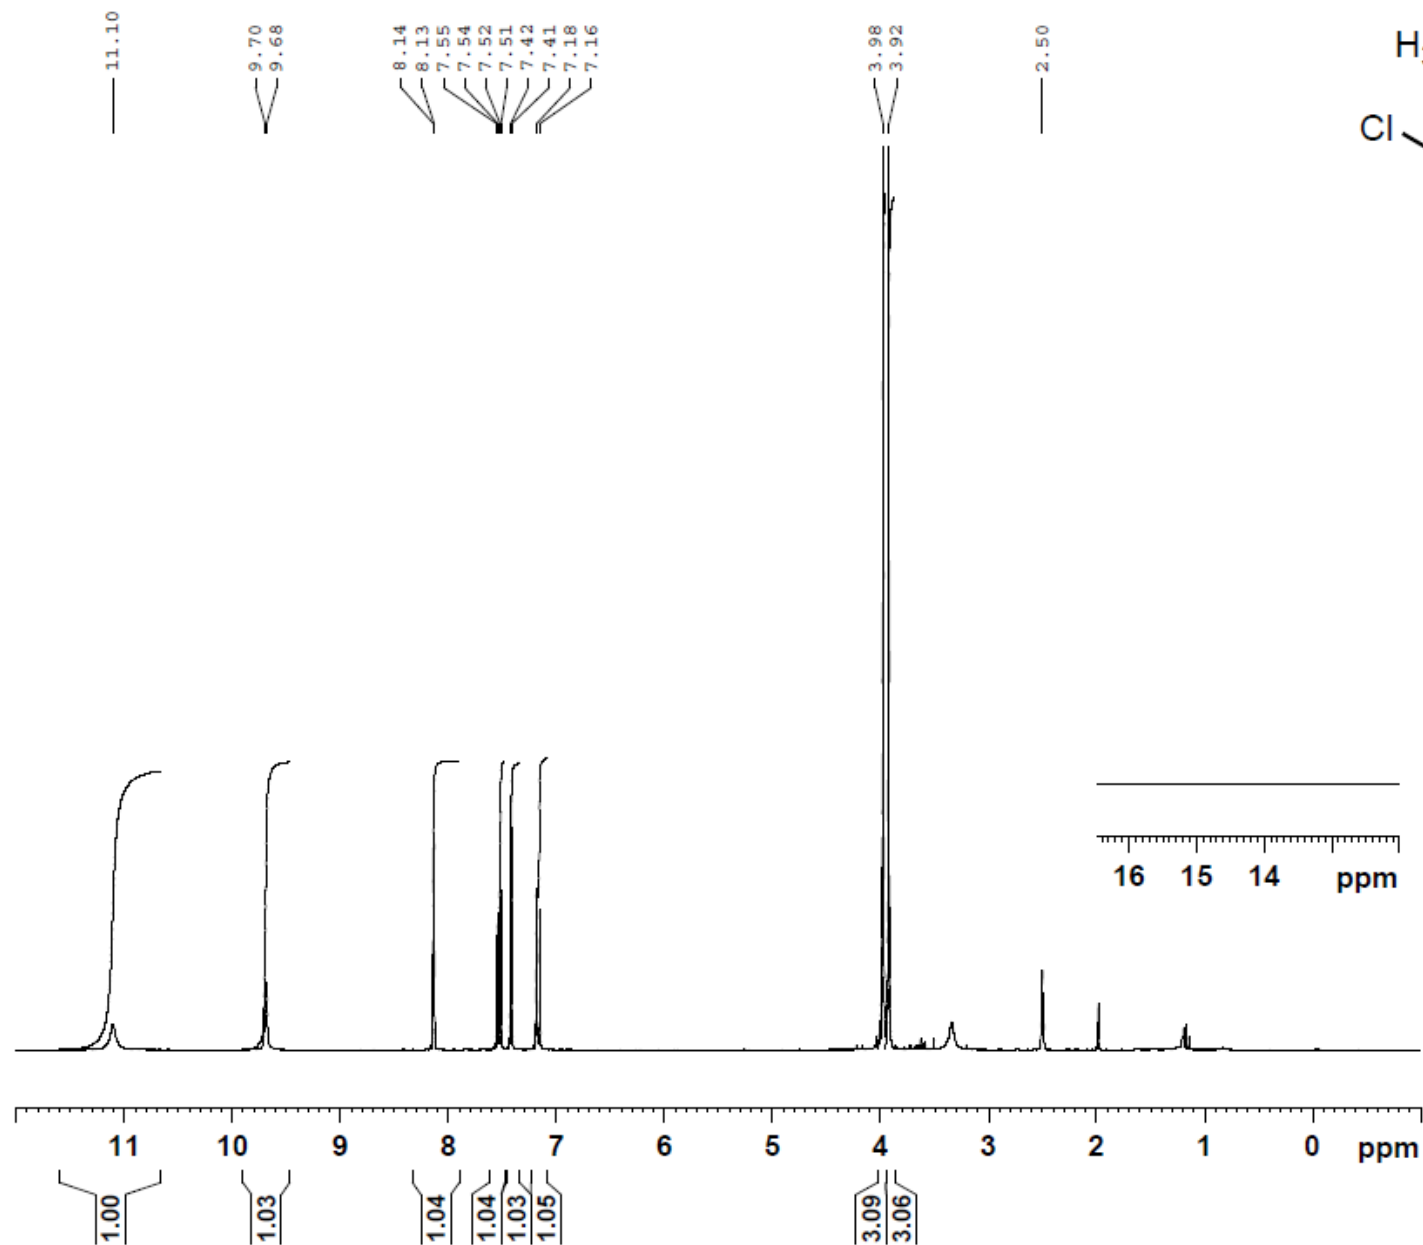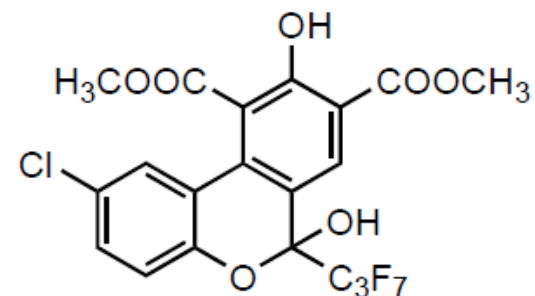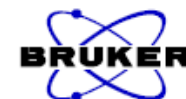

Current Data Parameters  
 NAME 110608.u315 IS-126  
 EXPNO 10  
 PROCNO 1

F2 - Acquisition Parameters  
 Date\_ 20110608  
 Time 12.30  
 INSTRUM spect  
 PROBHD 5 mm PABBO BB-  
 PULPROG zg30  
 TD 65536  
 SOLVENT DMSO  
 NS 16  
 DS 2  
 SWH 6188.119 Hz  
 FIDRES 0.094423 Hz  
 AQ 5.2953587 sec  
 RG 101  
 DW 80.800 usec  
 DE 10.00 usec  
 TE 298.2 K  
 D1 1.00000000 sec  
 TD0 1

===== CHANNEL f1 =====  
 NUC1 1H  
 P1 10.00 usec  
 PL1 0.00 dB  
 PL1W 11.25325108 W  
 SFO1 300.1318534 MHz

F2 - Processing parameters  
 SI 32768  
 SF 300.1300073 MHz  
 WDW EM  
 SSB 0  
 LB 0.30 Hz  
 GB 0  
 PC 1.00

Savych IS-126 13C DMSO

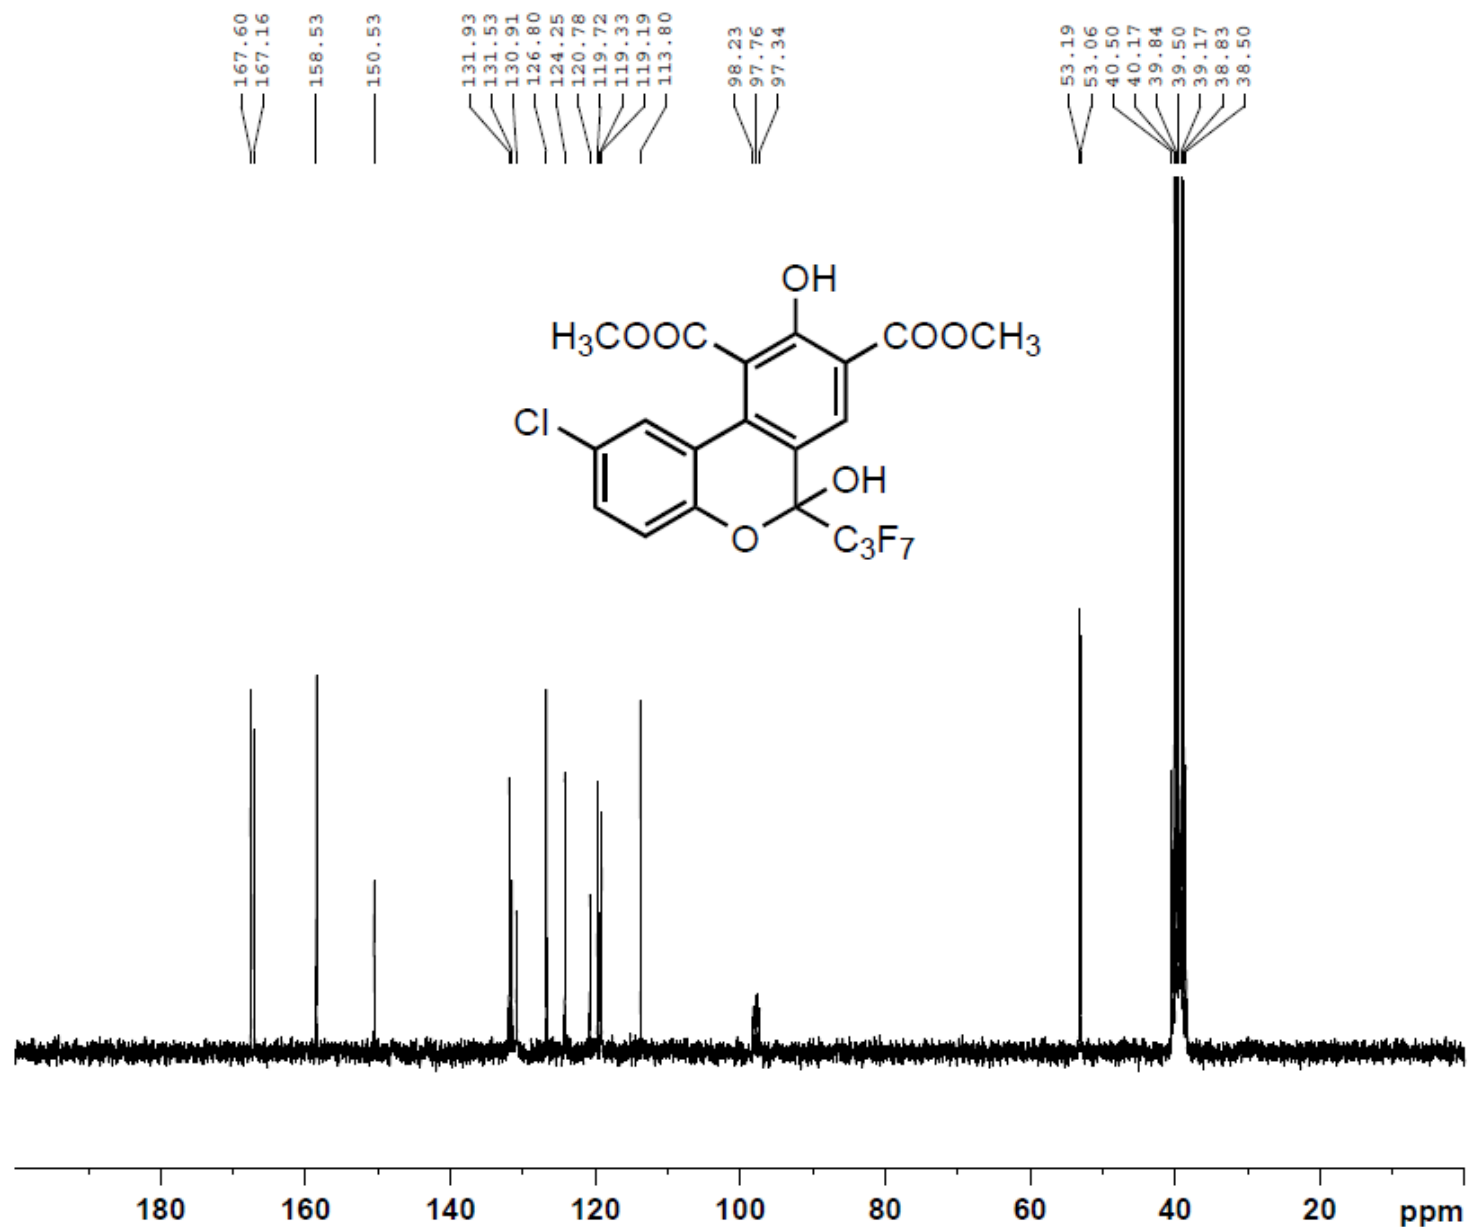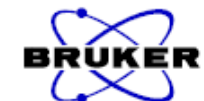

Current Data Parameters  
NAME 110608.209  
EXPNO 10  
PROCNO 1

F2 - Acquisition Parameters  
Date\_ 20110609  
Time 1.18  
INSTRUM spect  
PROBHD 5 mm PABBO BB-  
PULPROG zgpg30  
TD 65536  
SOLVENT DMSO  
NS 1024  
DS 4  
SWH 15000.000 Hz  
FIDRES 0.228882 Hz  
AQ 2.1845834 sec  
RG 2050  
DW 33.333 usec  
DE 10.00 usec  
TE 298.0 K  
D1 2.00000000 sec  
d11 0.03000000 sec  
DELTA 1.89999998 sec  
TD0 1

===== CHANNEL f1 =====  
NUC1 13C  
P1 10.00 usec  
PL1 -1.00 dB  
SFO1 62.9015280 MHz

===== CHANNEL f2 =====  
CPDPRG2 waltz16  
NUC2 1H  
PCPD2 70.00 usec  
PL12 15.00 dB  
PL13 15.00 dB  
PL2 -2.50 dB  
SFO2 250.1310005 MHz

F2 - Processing parameters  
SI 32768  
SF 62.8952669 MHz  
WDW EM  
SSB 0  
LB 1.00 Hz  
GB 0  
PC 1.40

Savych IS-126 19F DMSO

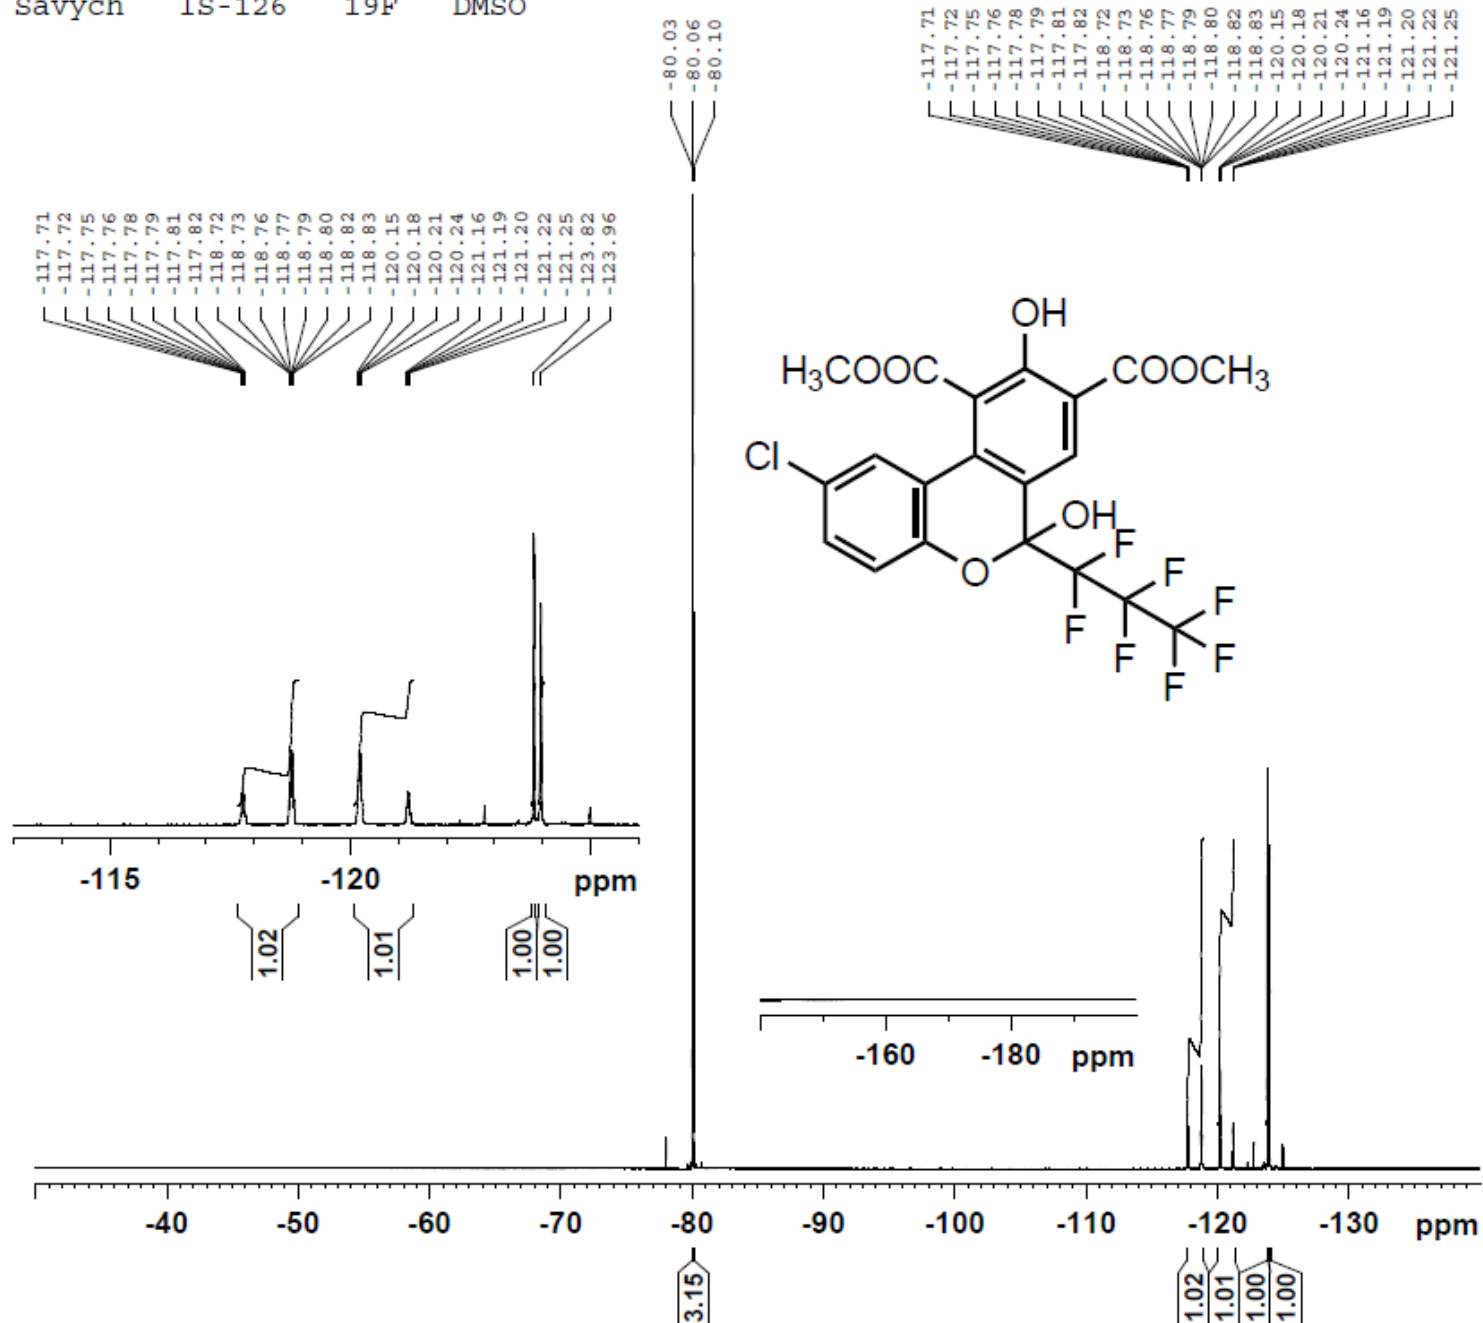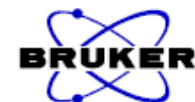

Current Data Parameters  
 NAME 110608.u315 IS-126  
 EXPNO 11  
 PROCNO 1

F2 - Acquisition Parameters  
 Date\_ 20110608  
 Time 12.34  
 INSTRUM spect  
 PROBHD 5 mm PABBO BB-  
 PULPROG zgfhigqn  
 TD 131072  
 SOLVENT DMSO  
 NS 48  
 DS 4  
 SWH 66964.289 Hz  
 FIDRES 0.510897 Hz  
 AQ 0.9787210 sec  
 RG 1150  
 DW 7.467 usec  
 DE 10.00 usec  
 TE 298.5 K  
 D1 1.00000000 sec  
 D11 0.03000000 sec  
 D12 0.00002000 sec  
 TD0 1

===== CHANNEL f1 =====  
 NUC1 19F  
 P1 10.00 usec  
 PL1 -3.00 dB  
 PL1W 15.53680420 W  
 SFO1 282.3761148 MHz

===== CHANNEL f2 =====  
 CPDPRG2 waltz16  
 NUC2 1H  
 PCPD2 72.00 usec  
 PL2 0.00 dB  
 PL12 17.00 dB  
 PL2W 11.25325108 W  
 PL12W 0.22453187 W  
 SFO2 300.1312005 MHz

F2 - Processing parameters  
 SI 65536  
 SF 282.4043550 MHz  
 WDW EM  
 SSB 0  
 LB 0.30 Hz  
 GB 0  
 PC 1.00

Savych. IS-134, DMSO, 1H

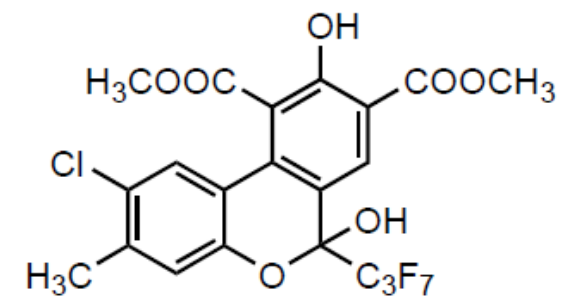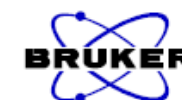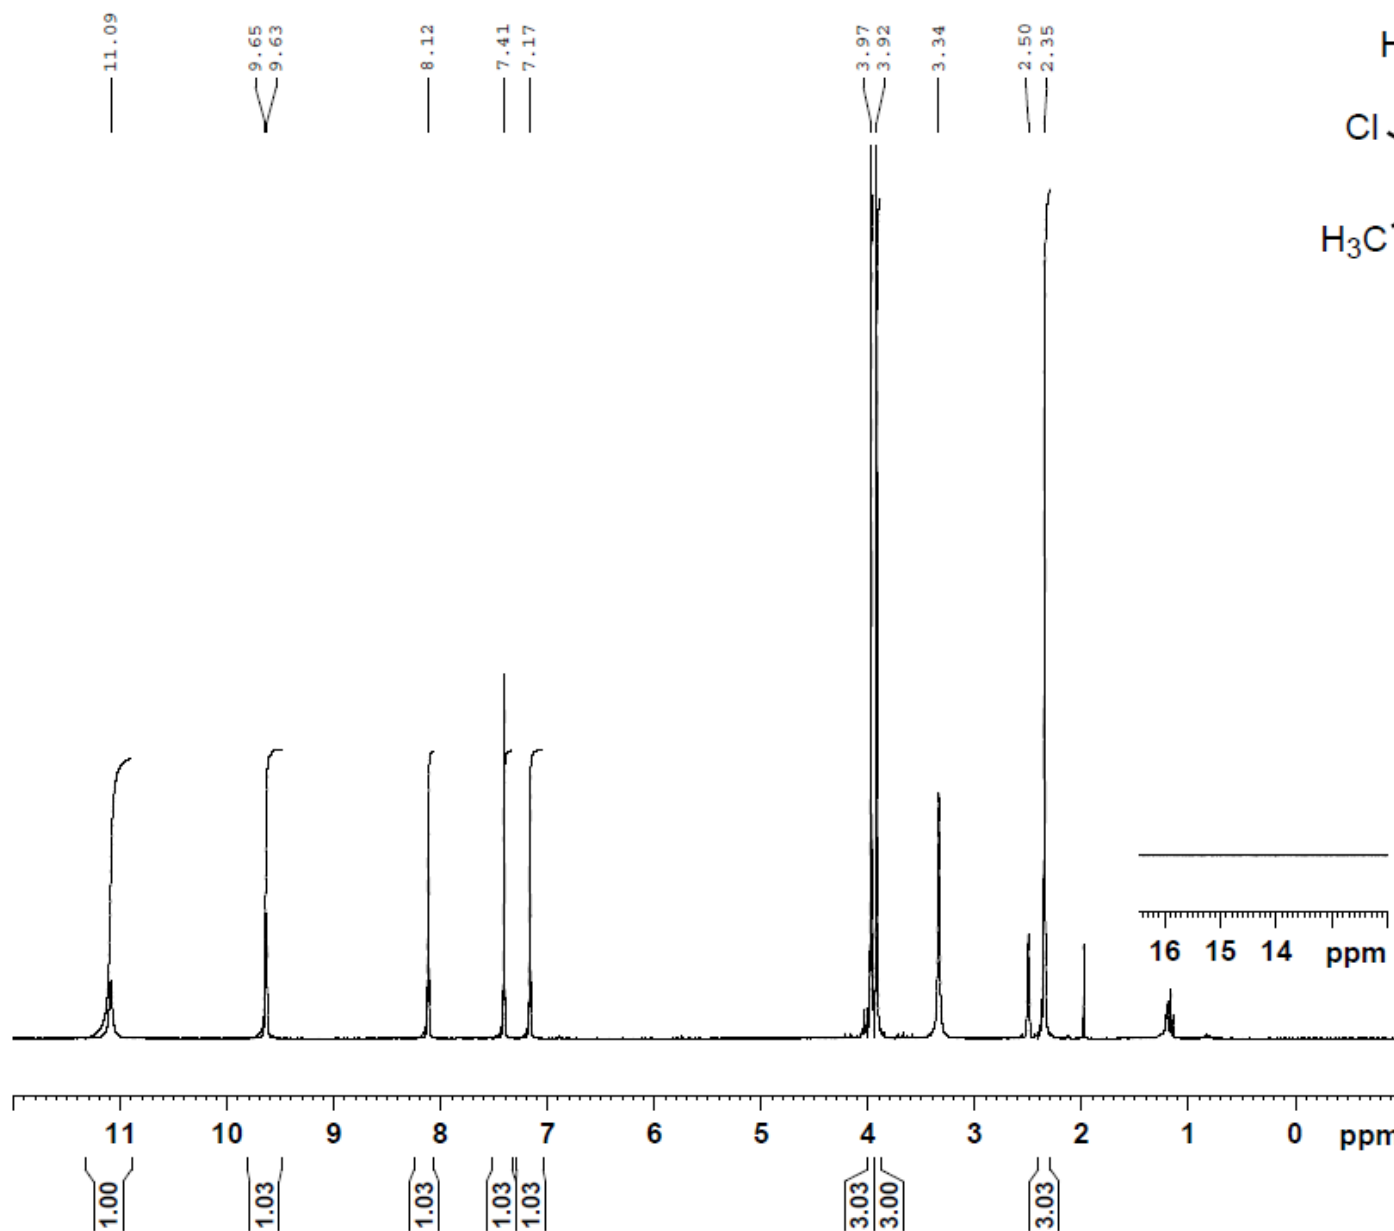

Current Data Parameters  
NAME 110622.u318 IS-134  
EXPNO 10  
PROCNO 1

F2 - Acquisition Parameters  
Date\_ 20110622  
Time 13.34  
INSTRUM spect  
PROBHD 5 mm PABBO BB-  
PULPROG zg30  
TD 65536  
SOLVENT DMSO  
NS 16  
DS 2  
SWH 6188.119 Hz  
FIDRES 0.094423 Hz  
AQ 5.2953587 sec  
RG 114  
DW 80.800 usec  
DE 10.00 usec  
TE 298.2 K  
D1 1.00000000 sec  
TD0 1

===== CHANNEL f1 =====  
NUC1 1H  
P1 10.00 usec  
PL1 0.00 dB  
PL1W 11.25325108 W  
SFO1 300.1318534 MHz

F2 - Processing parameters  
SI 32768  
SF 300.1300081 MHz  
WDW EM  
SSB 0  
LB 0.30 Hz  
GB 0  
PC 1.00



Savych. IS-134, DMSO, 13C

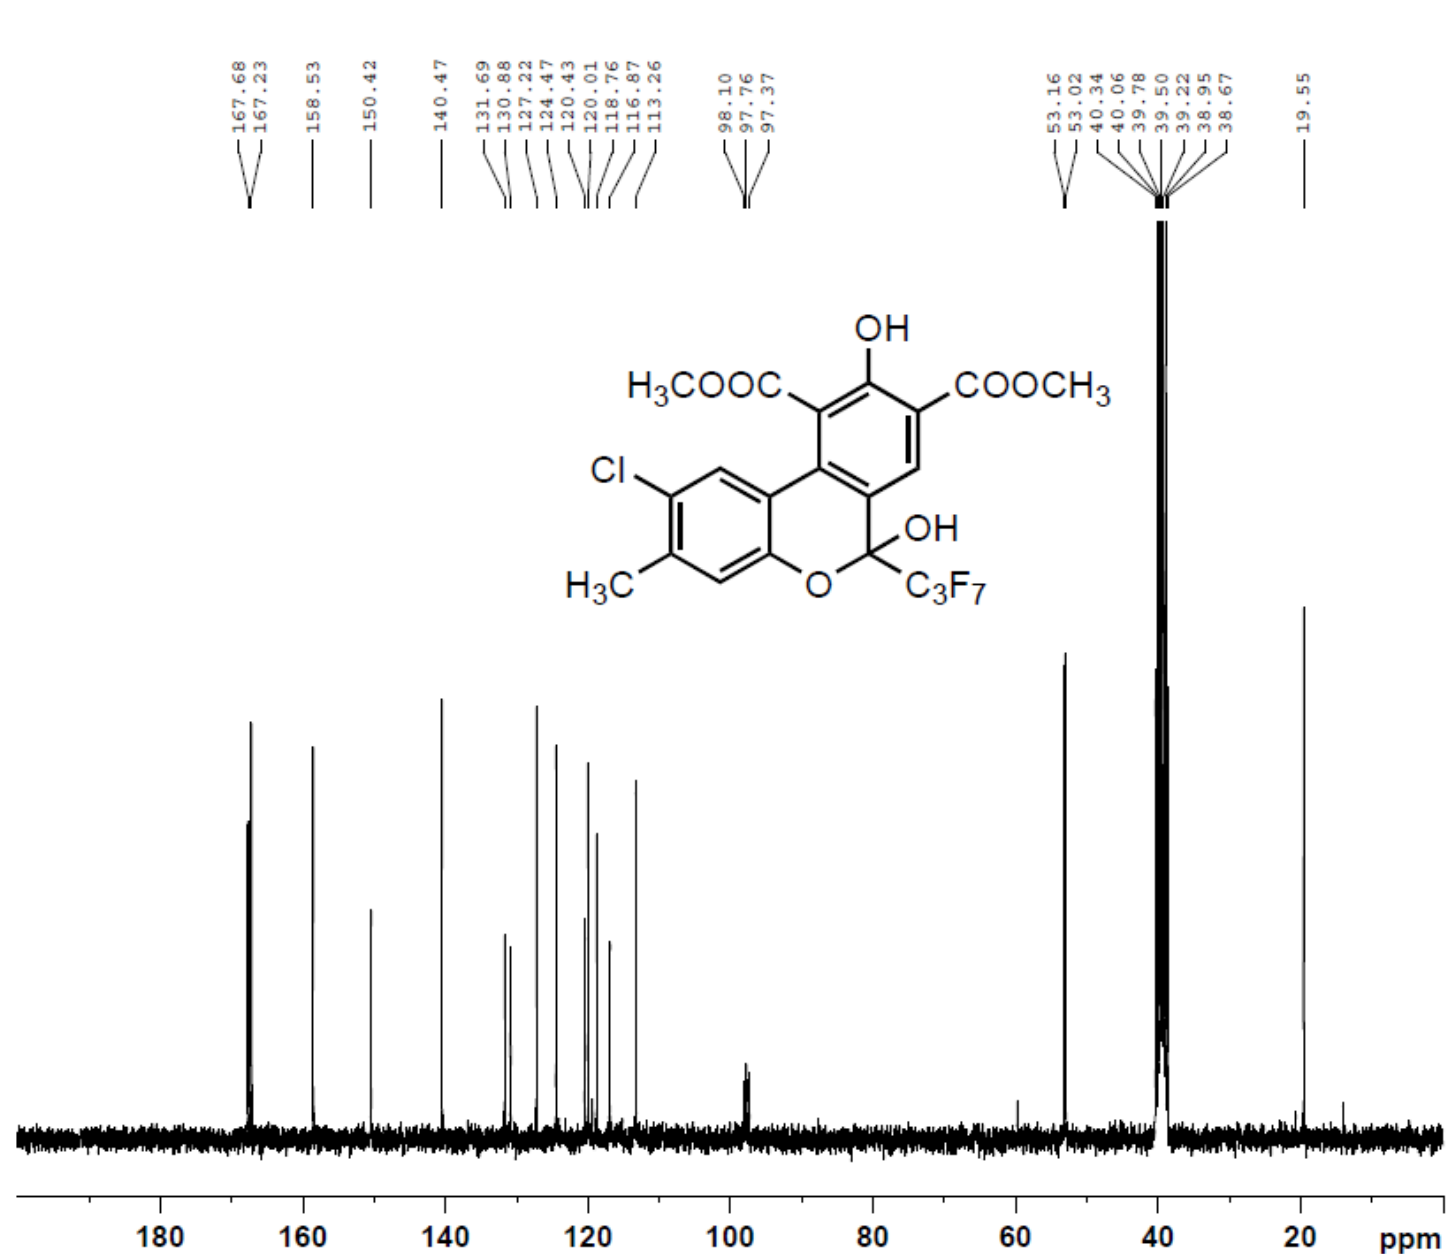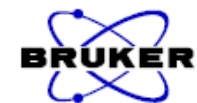

Current Data Parameters  
NAME 110622.u318 IS-134  
EXPNO 12  
PROCNO 1

F2 - Acquisition Parameters  
Date\_ 20110622  
Time 22.07  
INSTRUM spect  
PROBHD 5 mm PABBO BB-  
PULPROG zgpg30  
TD 65536  
SOLVENT DMSO  
NS 1024  
DS 4  
SWH 18028.846 Hz  
FIDRES 0.275098 Hz  
AQ 1.8175818 sec  
RG 2050  
DW 27.733 usec  
DE 10.00 usec  
TE 298.7 K  
D1 2.00000000 sec  
D11 0.03000000 sec  
TD0 1

===== CHANNEL f1 =====  
NUC1 13C  
P1 10.00 usec  
PL1 -0.50 dB  
PL1W 33.25691986 W  
SFO1 75.4752953 MHz

===== CHANNEL f2 =====  
CPDPRG2 waltz16  
NUC2 1H  
PCPD2 72.00 usec  
PL2 0.00 dB  
PL12 17.00 dB  
PL13 17.00 dB  
PL2W 11.25325108 W  
PL12W 0.22453187 W  
PL13W 0.22453187 W  
SFO2 300.1312005 MHz

F2 - Processing parameters  
SI 32768  
SF 75.4677854 MHz  
WDW EM  
SSB 0  
LB 1.00 Hz  
GB 0  
PC 1.40

Savych. IS-134, DMSO, 19F

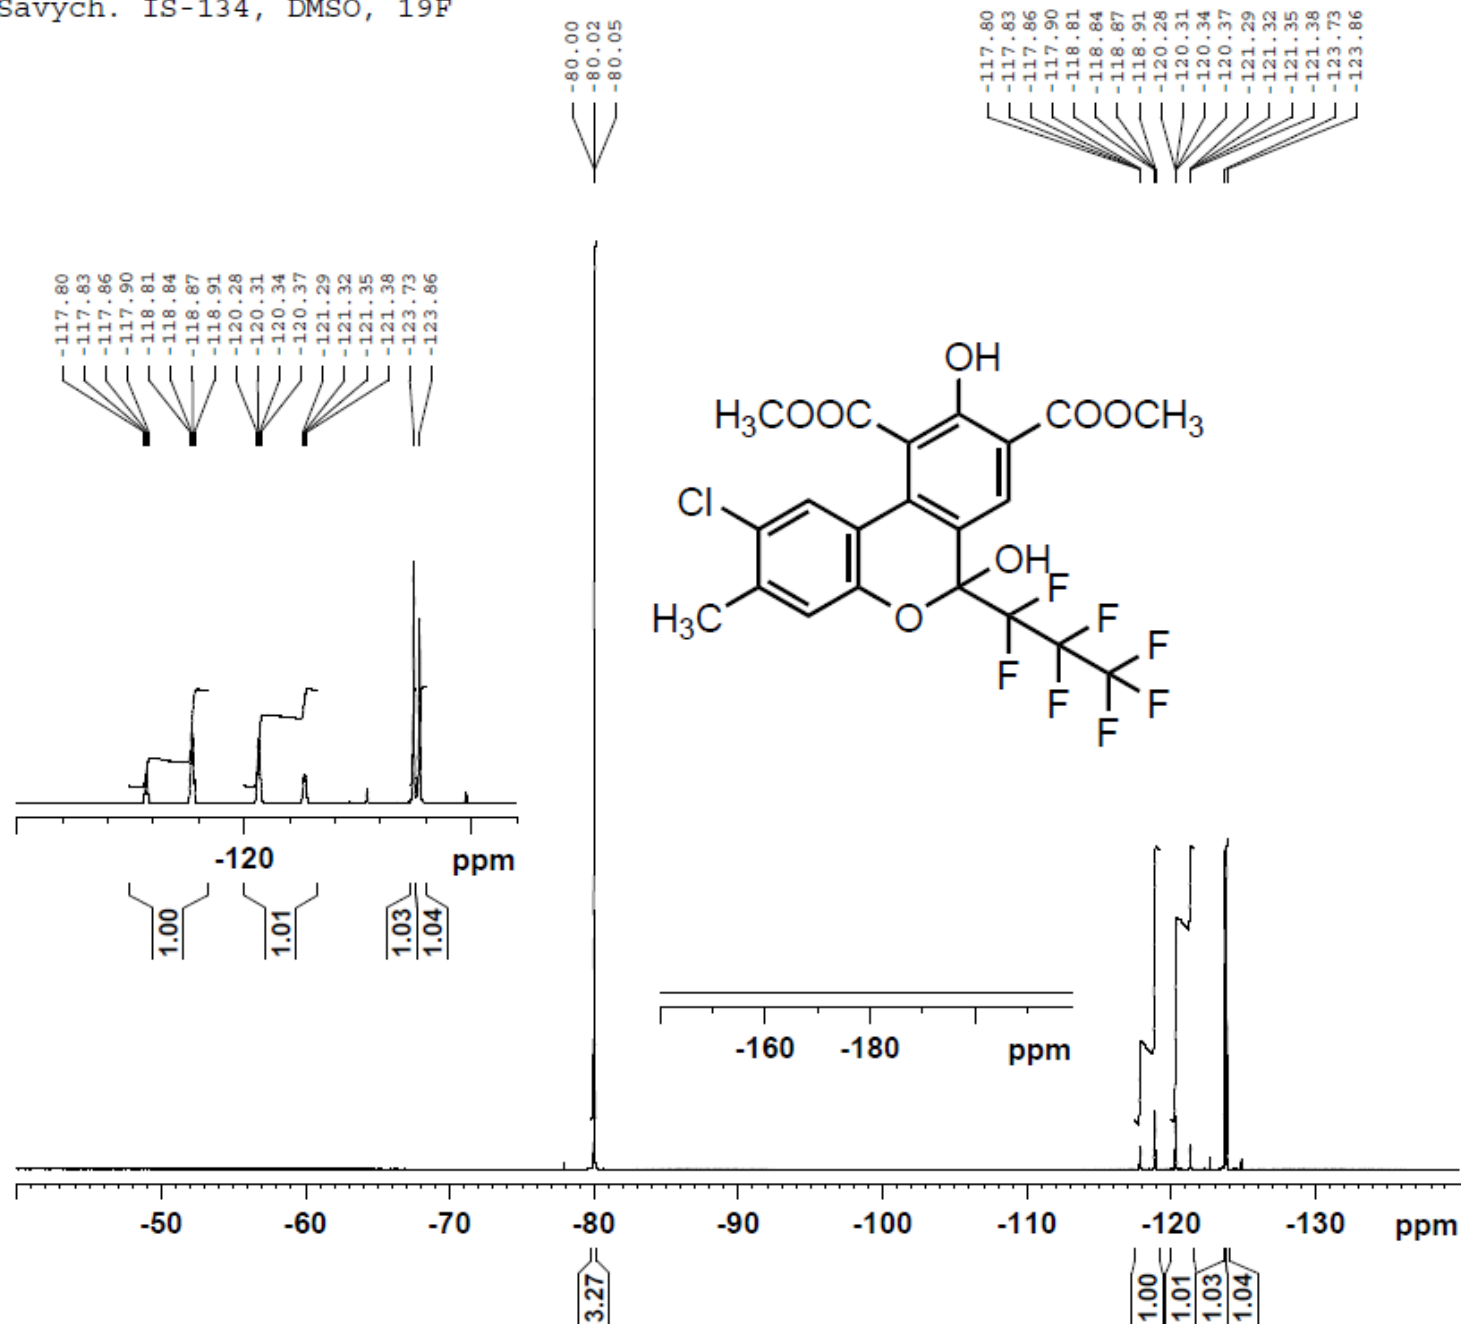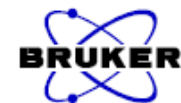

Current Data Parameters  
 NAME 110622.u318 IS-134  
 EXPNO 11  
 PROCNO 1

F2 - Acquisition Parameters  
 Date\_ 20110622  
 Time 13.40  
 INSTRUM spect  
 PROBHD 5 mm PABBO BB-  
 PULPROG zgfhigqn  
 TD 131072  
 SOLVENT DMSO  
 NS 128  
 DS 4  
 SWH 66964.289 Hz  
 FIDRES 0.510897 Hz  
 AQ 0.9787210 sec  
 RG 2050  
 DW 7.467 usec  
 DE 10.00 usec  
 TE 298.3 K  
 D1 1.00000000 sec  
 D11 0.03000000 sec  
 D12 0.00002000 sec  
 TD0 1

===== CHANNEL f1 =====  
 NUC1 19F  
 P1 10.00 usec  
 PL1 -3.00 dB  
 PL1W 15.53680420 W  
 SFO1 282.3761148 MHz

===== CHANNEL f2 =====  
 CPDPRG2 waltz16  
 NUC2 1H  
 PCPD2 72.00 usec  
 PL2 0.00 dB  
 PL12 17.00 dB  
 PL2W 11.25325108 W  
 PL12W 0.22453187 W  
 SFO2 300.1312005 MHz

F2 - Processing parameters  
 SI 65536  
 SF 282.4043550 MHz  
 WDW EM  
 SSB 0  
 LB 0.30 Hz  
 GB 0  
 PC 1.00

Savych, IS-99.1, DMSO, 1H

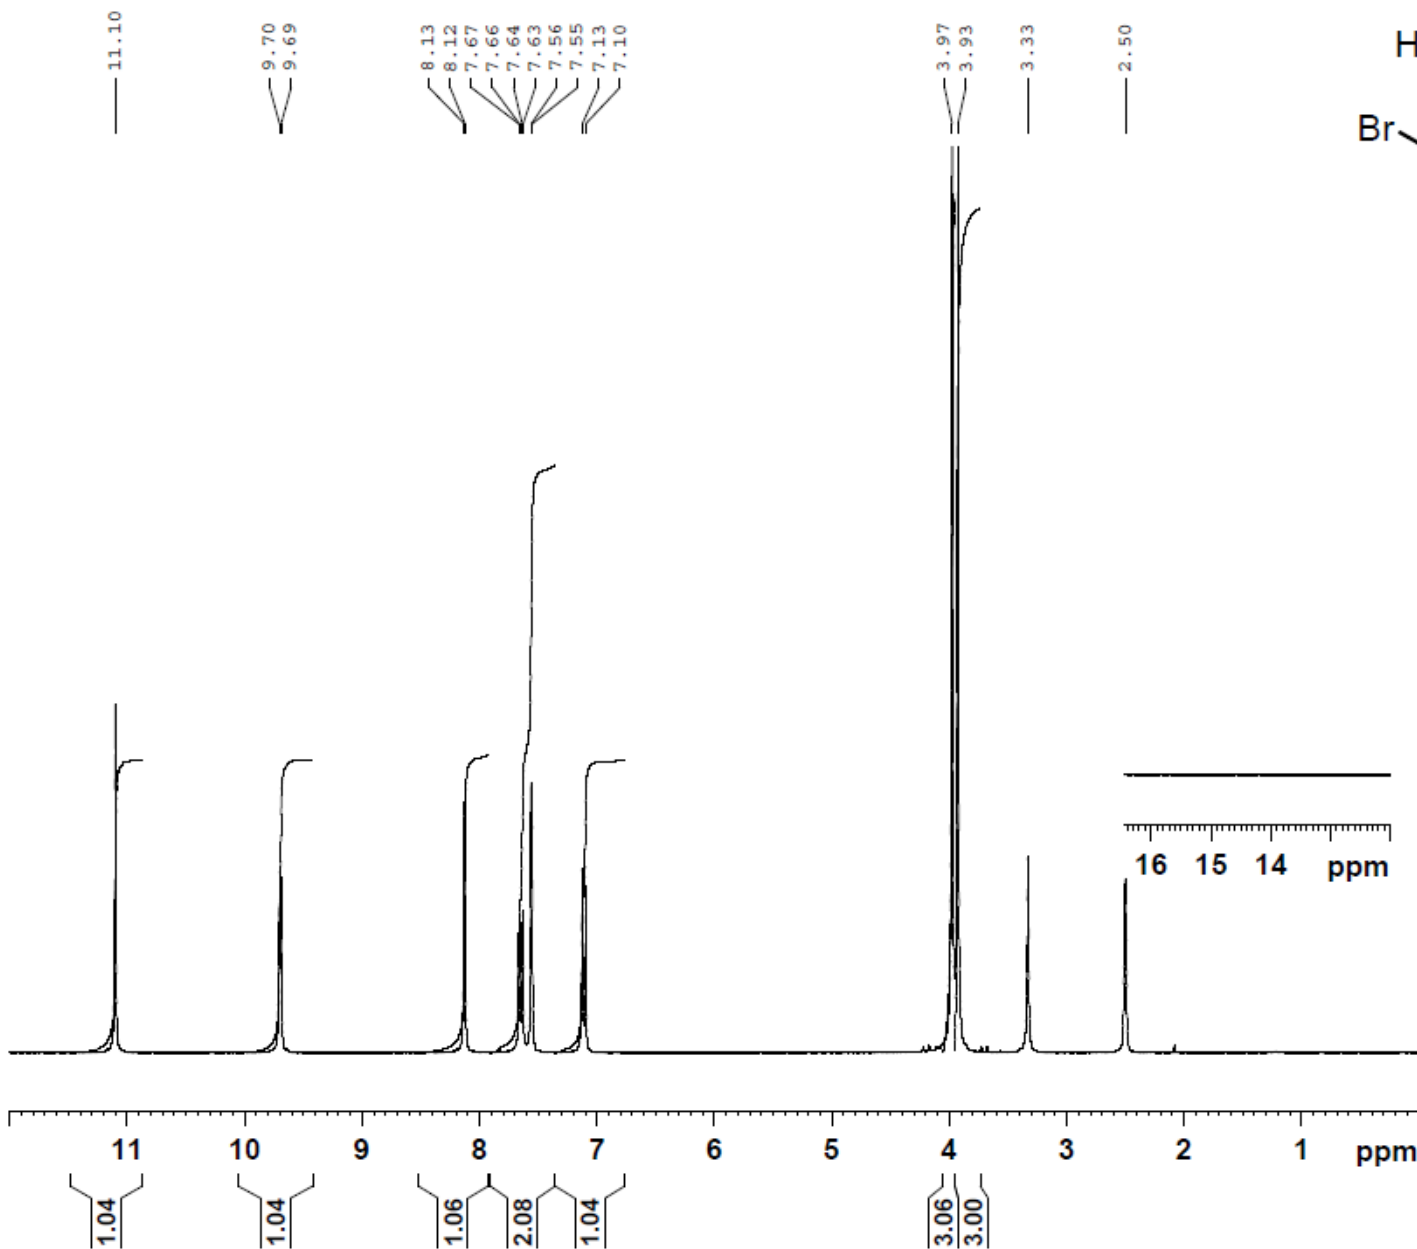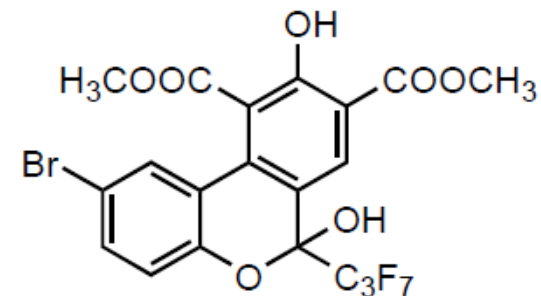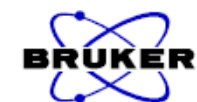

Current Data Parameters  
NAME 110428.u311  
EXPNO 20  
PROCNO 1

F2 - Acquisition Parameters  
Date\_ 20110428  
Time 12.14  
INSTRUM spect  
PROBHD 5 mm PABBO BB-  
PULPROG zg30  
TD 65536  
SOLVENT DMSO  
NS 16  
DS 2  
SWH 6188.119 Hz  
FIDRES 0.094423 Hz  
AQ 5.2953587 sec  
RG 144  
DW 80.800 usec  
DE 10.00 usec  
TE 298.2 K  
D1 1.00000000 sec  
TD0 1

===== CHANNEL f1 =====  
NUC1 1H  
P1 10.00 usec  
PL1 0.00 dB  
PL1W 11.25325108 W  
SFO1 300.1318534 MHz

F2 - Processing parameters  
SI 32768  
SF 300.1300071 MHz  
WDW EM  
SSB 0  
LB 0.30 Hz  
GB 0  
PC 1.00

Savych, IS-99.1, DMSO, 13C

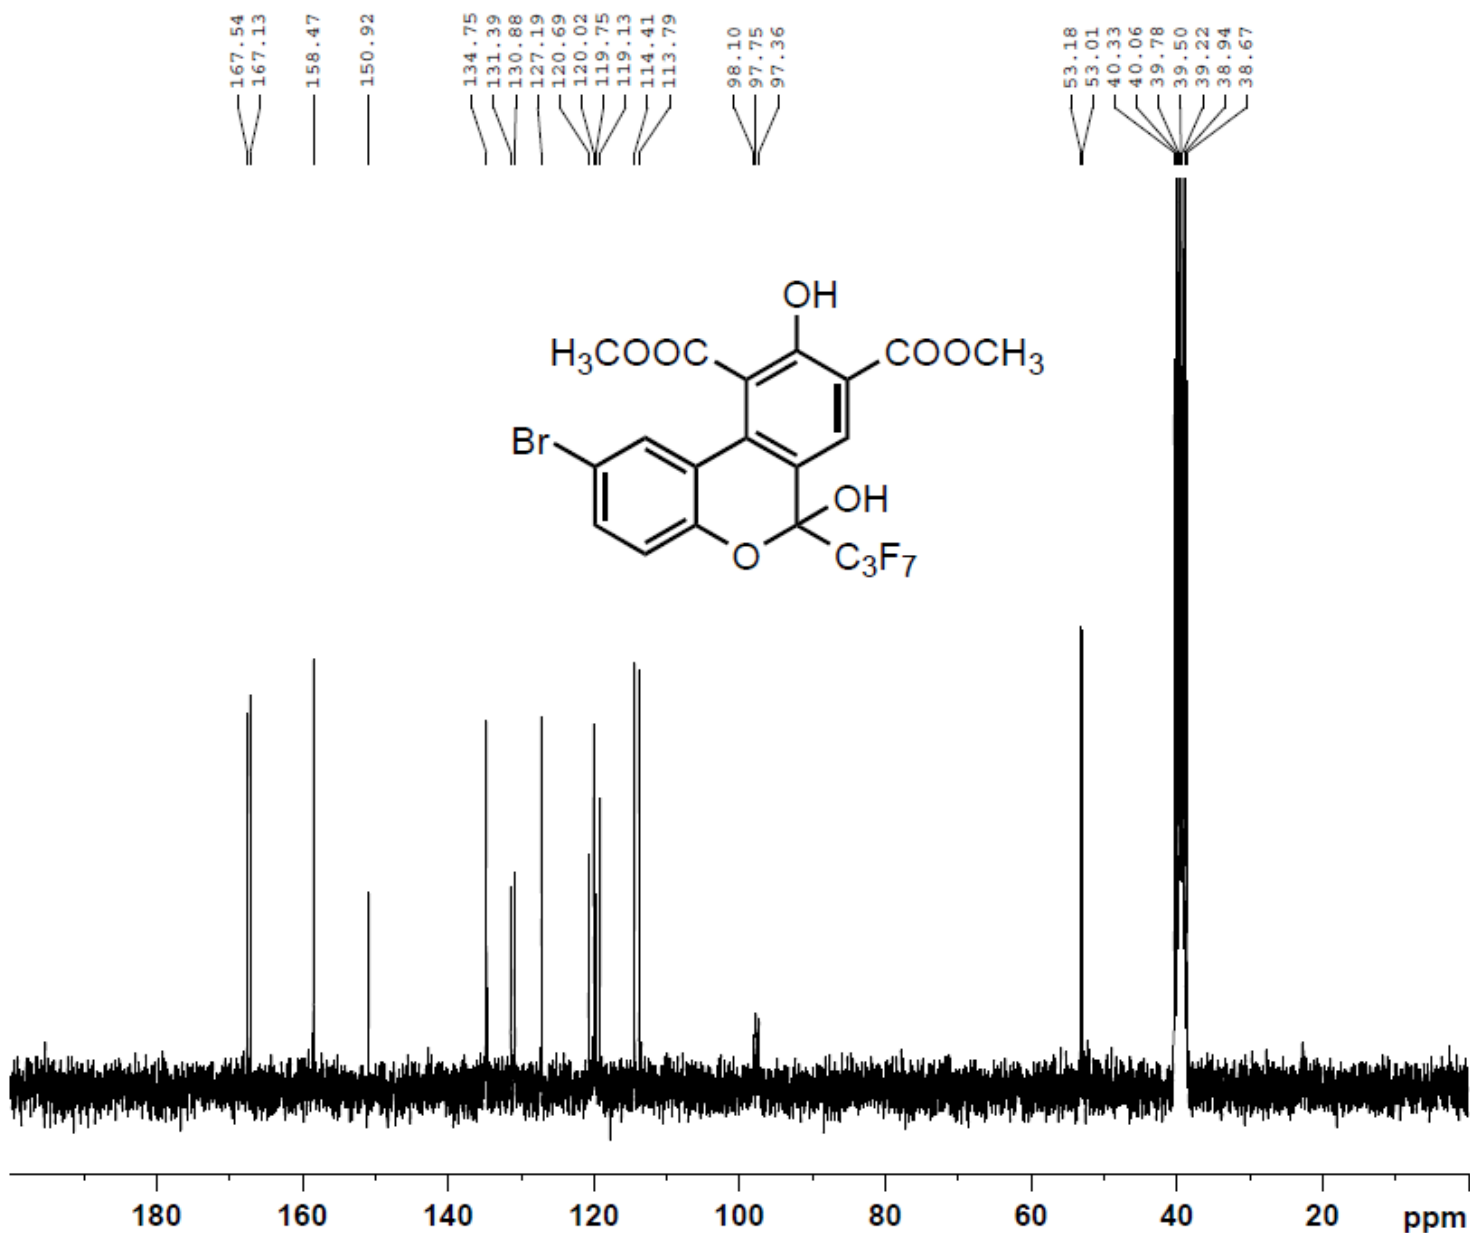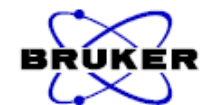

Current Data Parameters  
NAME 110428.u311 IS-99.1  
EXPNO 22  
PROCNO 1

F2 - Acquisition Parameters  
Date\_ 20110428  
Time 17.34  
INSTRUM spect  
PROBHD 5 mm PABBO BB-  
PULPROG zgpg30  
TD 65536  
SOLVENT DMSO  
NS 512  
DS 4  
SWH 18028.846 Hz  
FIDRES 0.275098 Hz  
AQ 1.8175818 sec  
RG 2050  
DW 27.733 usec  
DE 10.00 usec  
TE 299.5 K  
D1 2.00000000 sec  
D11 0.03000000 sec  
TD0 1

===== CHANNEL f1 =====  
NUC1 13C  
P1 10.00 usec  
PL1 -0.50 dB  
PL1W 33.25691986 W  
SFO1 75.4752953 MHz

===== CHANNEL f2 =====  
CPDPRG2 waltz16  
NUC2 1H  
PCPD2 72.00 usec  
PL2 0.00 dB  
PL12 17.00 dB  
PL13 17.00 dB  
PL2W 11.25325108 W  
PL12W 0.22453187 W  
PL13W 0.22453187 W  
SFO2 300.1312005 MHz

F2 - Processing parameters  
SI 32768  
SF 75.4677870 MHz  
WDW EM  
SSB 0  
LB 1.00 Hz  
GB 0  
PC 1.40

Savych, IS-99.1, DMSO, 19 F

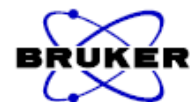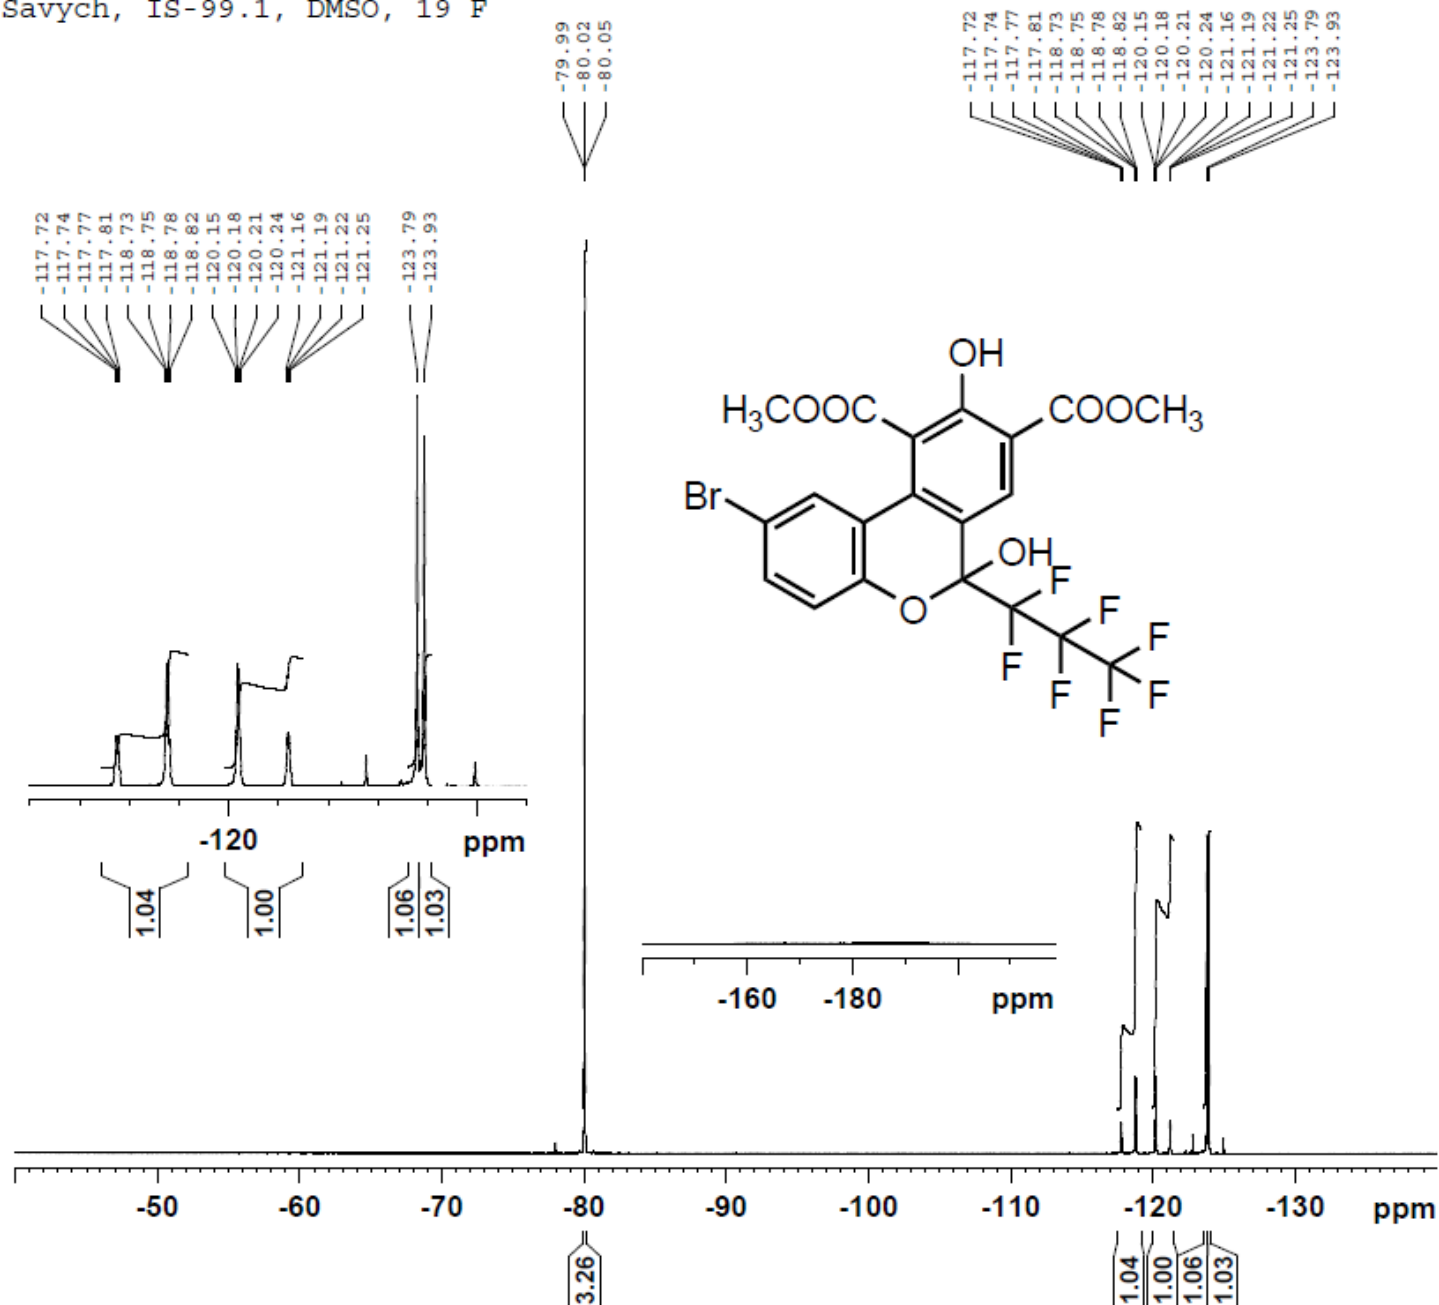

Current Data Parameters  
 NAME 110428.u311 IS-99.1  
 EXPNO 21  
 PROCNO 1

F2 - Acquisition Parameters  
 Date\_ 20110428  
 Time 12.18  
 INSTRUM spect  
 PROBHD 5 mm PABBO BB-  
 PULPROG zgfhigqn  
 TD 131072  
 SOLVENT DMSO  
 NS 64  
 DS 4  
 SWH 66964.289 Hz  
 FIDRES 0.510897 Hz  
 AQ 0.9787210 sec  
 RG 2050  
 DW 7.467 usec  
 DE 10.00 usec  
 TE 298.3 K  
 D1 1.00000000 sec  
 D11 0.03000000 sec  
 D12 0.00002000 sec  
 TD0 1

===== CHANNEL f1 =====  
 NUC1 19F  
 P1 10.00 usec  
 PL1 -3.00 dB  
 PL1W 15.53680420 W  
 SFO1 282.3761148 MHz

===== CHANNEL f2 =====  
 CPDPRG2 waitz16  
 NUC2 1H  
 PCPD2 72.00 usec  
 PL2 0.00 dB  
 PL12 17.00 dB  
 PL2W 11.25325108 W  
 PL12W 0.22453187 W  
 SFO2 300.1312005 MHz

F2 - Processing parameters  
 SI 65536  
 SF 282.4043550 MHz  
 WDW EM  
 SSB 0  
 LB 0.30 Hz  
 GB 0  
 PC 1.00

Savych, IS-137, DMSO, 1H

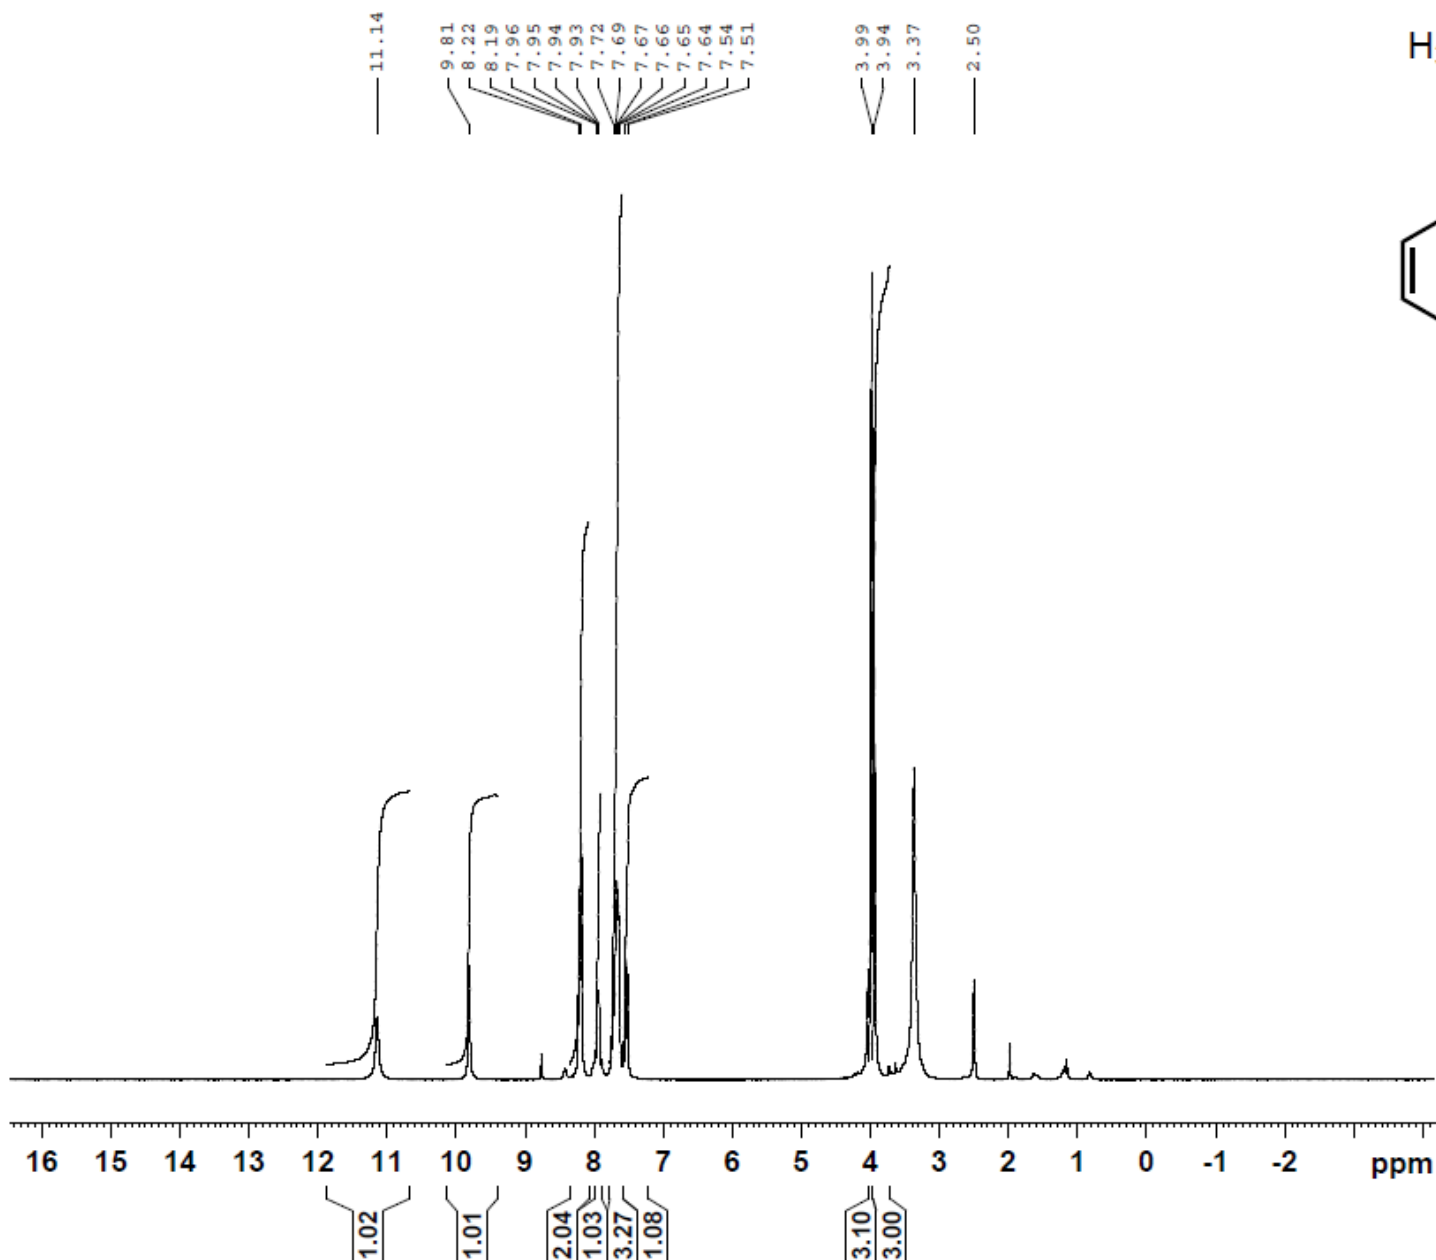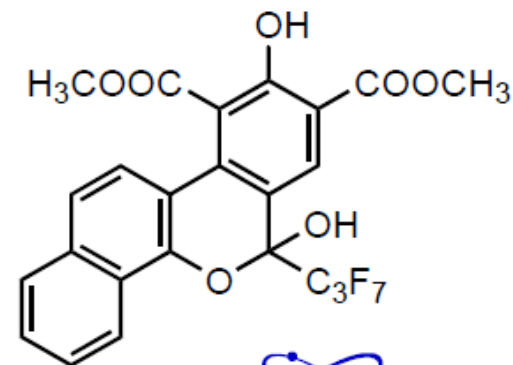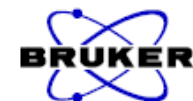

Current Data Parameters  
NAME 110627.u315 IS-137  
EXPNO 10  
PROCNO 1

F2 - Acquisition Parameters  
Date\_ 20110627  
Time 12.02  
INSTRUM spect  
PROBHD 5 mm PABBO BB-  
PULPROG zg30  
TD 65536  
SOLVENT DMSO  
NS 16  
DS 2  
SWH 6188.119 Hz  
FIDRES 0.094423 Hz  
AQ 5.2953587 sec  
RG 101  
DW 80.800 usec  
DE 10.00 usec  
TE 298.2 K  
D1 1.00000000 sec  
TD0 1

===== CHANNEL f1 =====  
NUC1 1H  
P1 10.00 usec  
PL1 0.00 dB  
PL1W 11.25325108 W  
SFO1 300.1318534 MHz

F2 - Processing parameters  
SI 32768  
SF 300.1300113 MHz  
WDW EM  
SSB 0  
LB 0.30 Hz  
GB 0  
PC 1.00

Savych, IS-137, DMSO, 13C

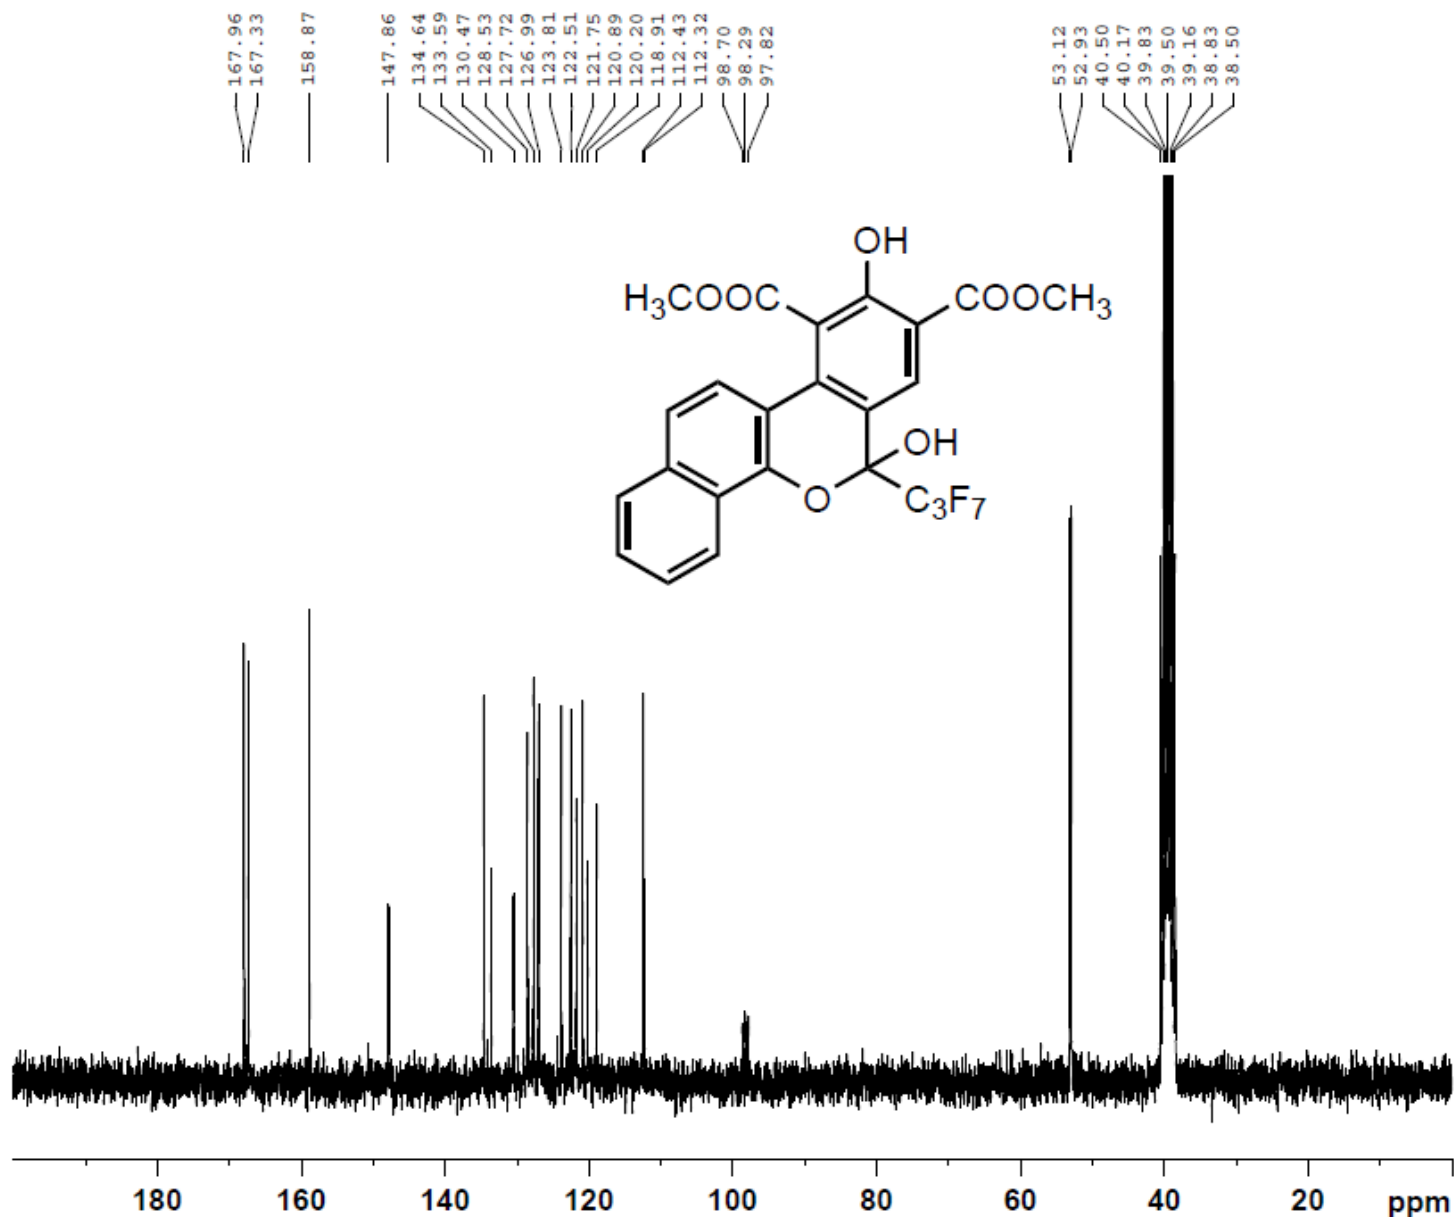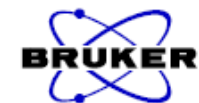

Current Data Parameters  
NAME 110629.210 IS-137  
EXPNO 10  
PROCNO 1

F2 - Acquisition Parameters  
Date\_ 20110629  
Time 16.53  
INSTRUM spect  
PROBHD 5 mm PABBO BB-  
PULPROG zgpg30  
TD 65536  
SOLVENT DMSO  
NS 1024  
DS 4  
SWH 15000.000 Hz  
FIDRES 0.228882 Hz  
AQ 2.1845834 sec  
RG 2050  
DW 33.333 usec  
DE 10.00 usec  
TE 301.4 K  
D1 2.00000000 sec  
d11 0.03000000 sec  
DELTA 1.89999998 sec  
TD0 1

=====  
CHANNEL f1  
NUC1 13C  
P1 10.00 usec  
PL1 -1.00 dB  
SFO1 62.9015280 MHz

=====  
CHANNEL f2  
CPDPRG2 waltz16  
NUC2 1H  
PCPD2 70.00 usec  
PL12 15.00 dB  
PL13 15.00 dB  
PL2 -2.50 dB  
SFO2 250.1310005 MHz

F2 - Processing parameters  
SI 32768  
SF 62.8952683 MHz  
WDW EM  
SSB 0  
LB 1.00 Hz  
GB 0  
PC 1.40

Savych, IS-137, DMSO, 19F

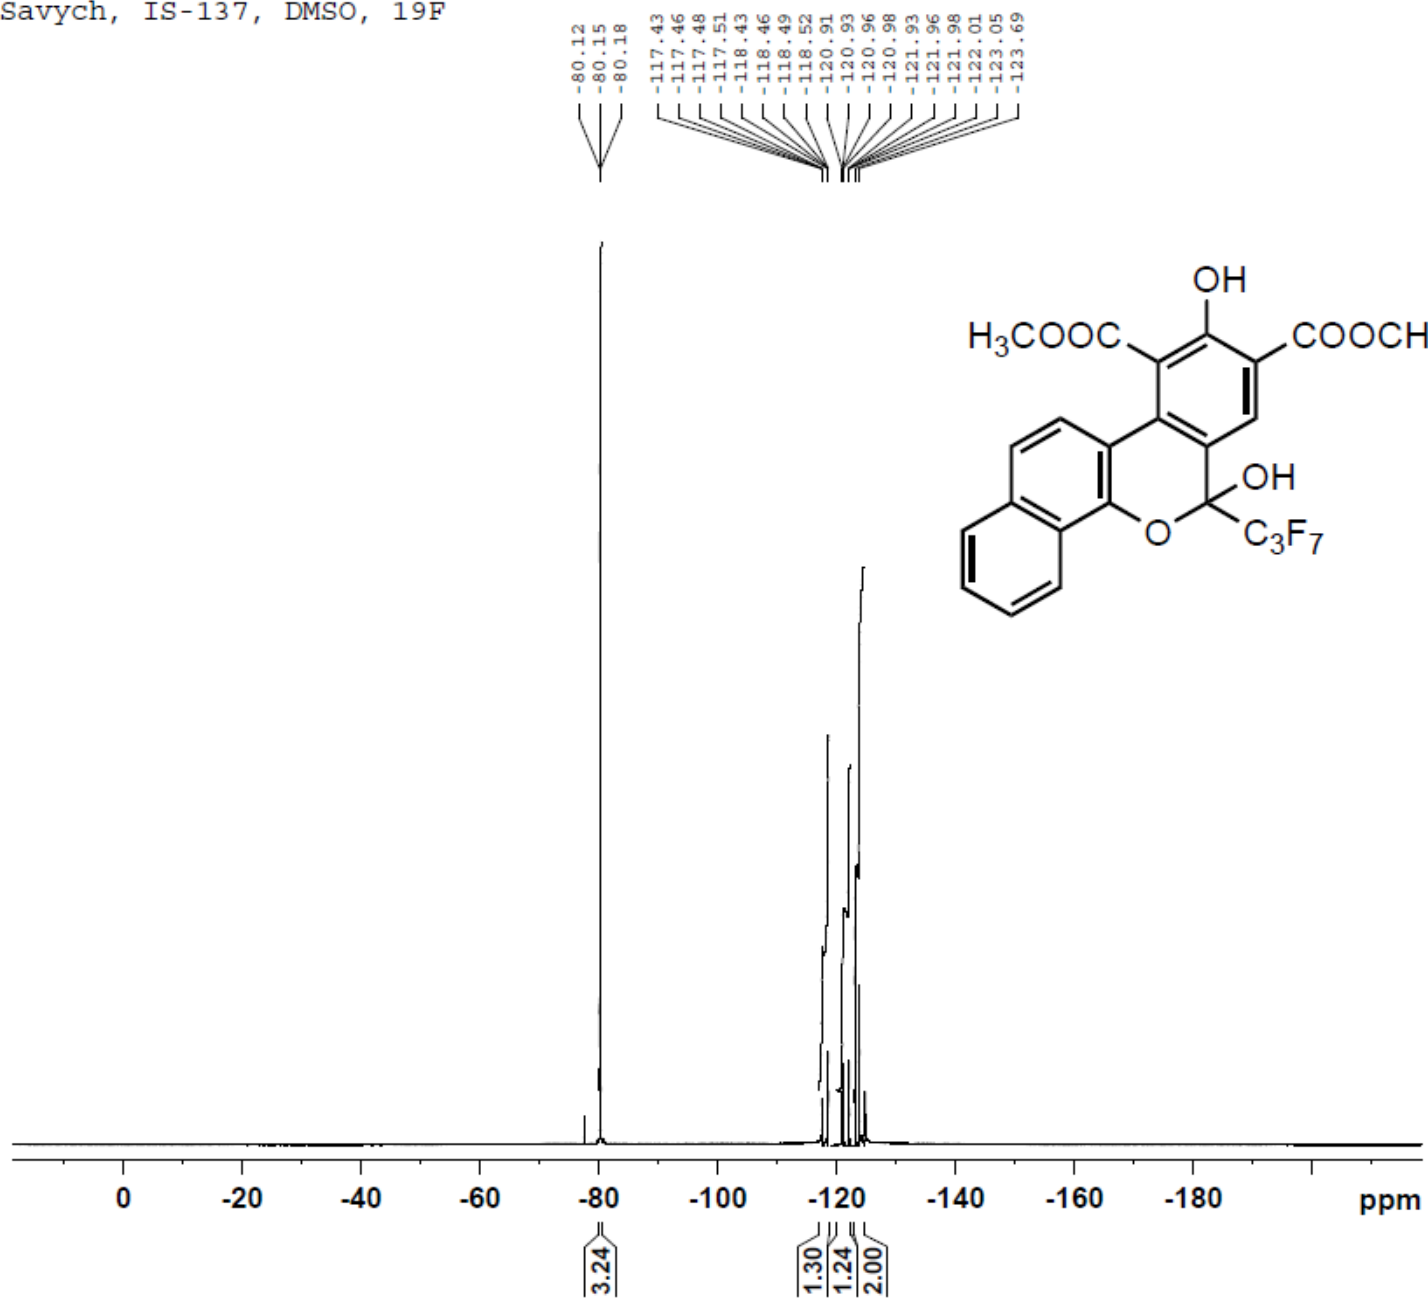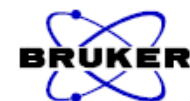

Current Data Parameters  
 NAME 110627.u315 IS-137  
 EXPNO 11  
 PROCNO 1

F2 - Acquisition Parameters  
 Date\_ 20110627  
 Time 12.08  
 INSTRUM spect  
 PROBHD 5 mm PABBO BB-  
 PULPROG zgffhigqn  
 TD 131072  
 SOLVENT DMSO  
 NS 128  
 DS 4  
 SWH 66964.289 Hz  
 FIDRES 0.510897 Hz  
 AQ 0.9787210 sec  
 RG 2050  
 DW 7.467 usec  
 DE 10.00 usec  
 TE 298.2 K  
 D1 1.00000000 sec  
 D11 0.03000000 sec  
 D12 0.00002000 sec  
 TD0 1

===== CHANNEL f1 =====  
 NUC1 19F  
 P1 10.00 usec  
 PL1 -3.00 dB  
 PL1W 15.53680420 W  
 SFO1 282.3761148 MHz

===== CHANNEL f2 =====  
 CPDPRG2 waltz16  
 NUC2 1H  
 PCPD2 72.00 usec  
 PL2 0.00 dB  
 PL12 17.00 dB  
 PL2W 11.25325108 W  
 PL12W 0.22453187 W  
 SFO2 300.1312005 MHz

F2 - Processing parameters  
 SI 65536  
 SF 282.4043550 MHz  
 WDW EM  
 SSB 0  
 LB 0.30 Hz  
 GB 0  
 PC 1.00



Savych, IS 149, CDCl<sub>3</sub>, 1H

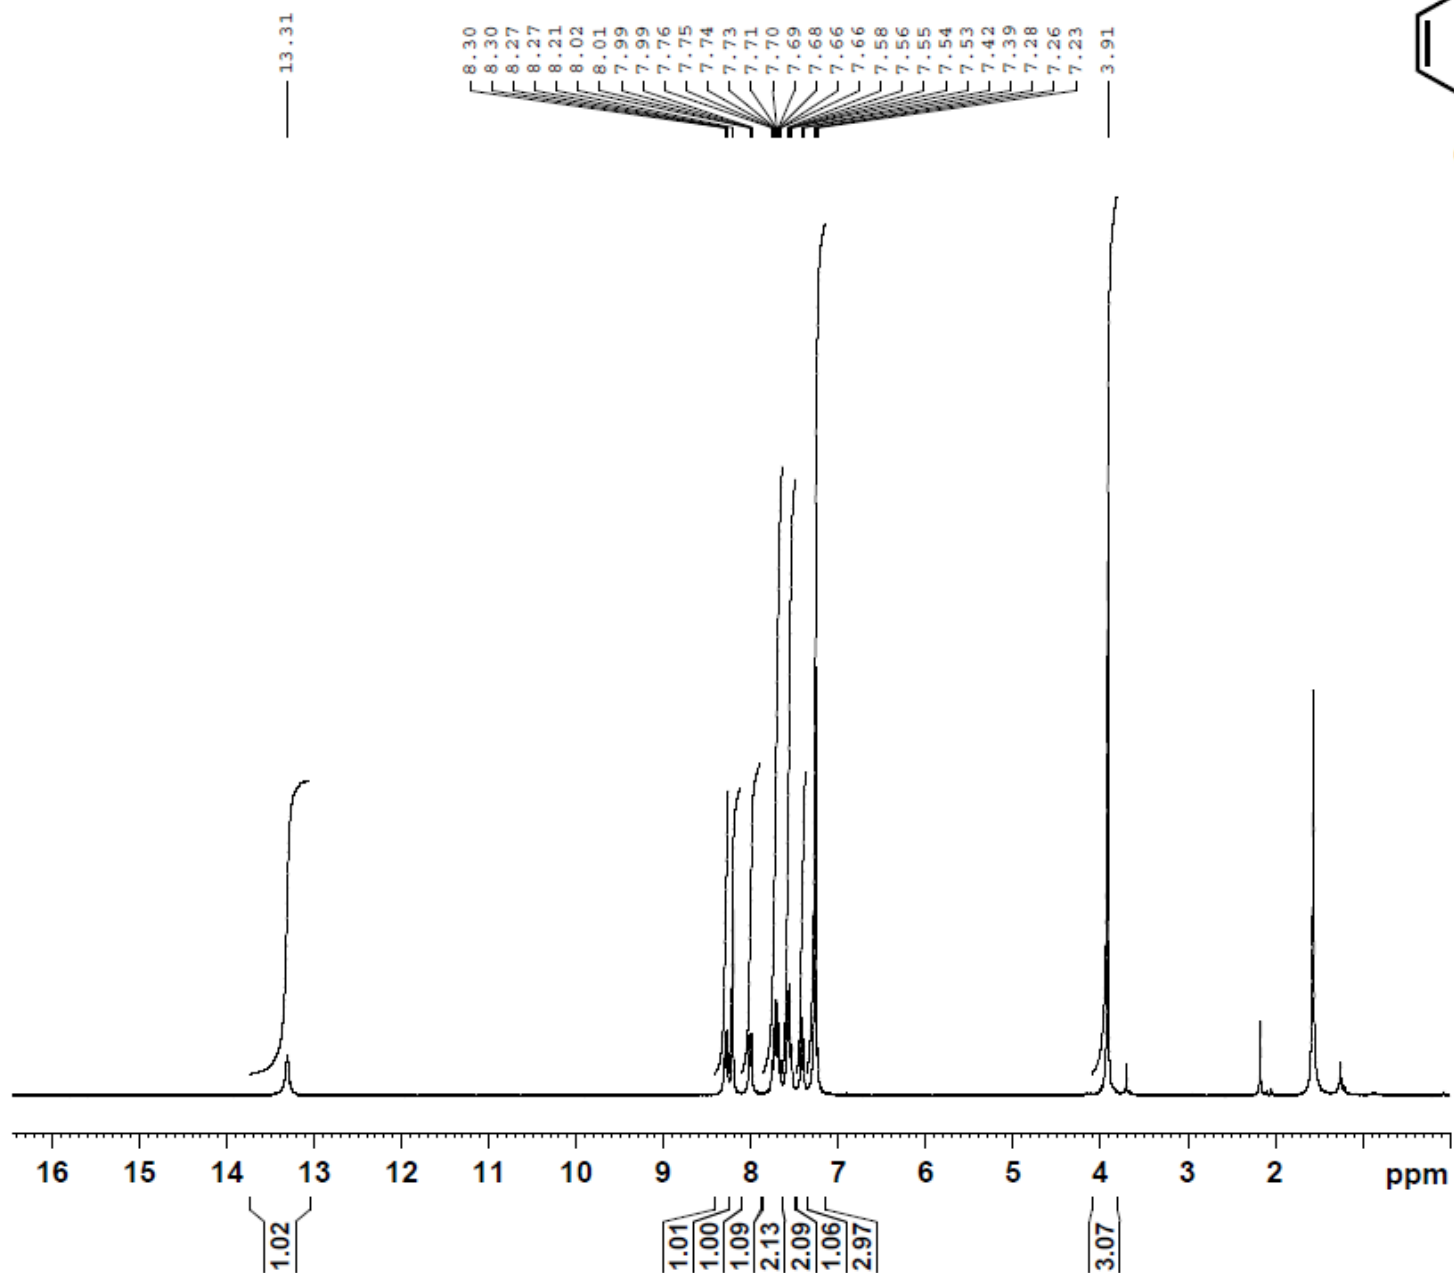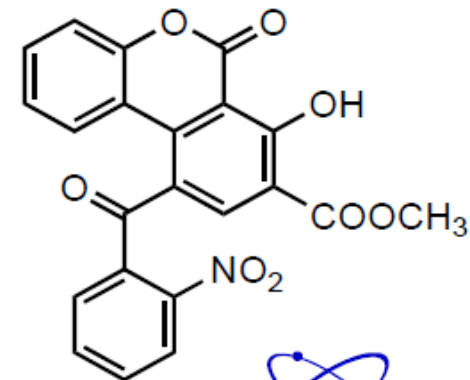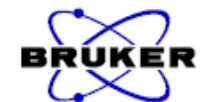

Current Data Parameters  
NAME 110811.u321 IS-149  
EXPNO 10  
PROCNO 1

F2 - Acquisition Parameters  
Date\_ 20110811  
Time 12.11  
INSTRUM spect  
PROBHD 5 mm PABBO BB-  
PULPROG zg30  
TD 65536  
SOLVENT CDCl<sub>3</sub>  
NS 16  
DS 2  
SWH 6188.119 Hz  
FIDRES 0.094423 Hz  
AQ 5.2953587 sec  
RG 256  
DW 80.800 usec  
DE 10.00 usec  
TE 298.2 K  
D1 1.0000000 sec  
TD0 1

===== CHANNEL f1 =====  
NUC1 1H  
P1 10.00 usec  
PL1 0.00 dB  
PL1W 11.25325108 W  
SFO1 300.1318534 MHz

F2 - Processing parameters  
SI 32768  
SF 300.1300122 MHz  
WDW EM  
SSB 0  
LB 0.30 Hz  
GB 0  
PC 1.00

Savych, IS 149, CDCl<sub>3</sub>, 13C

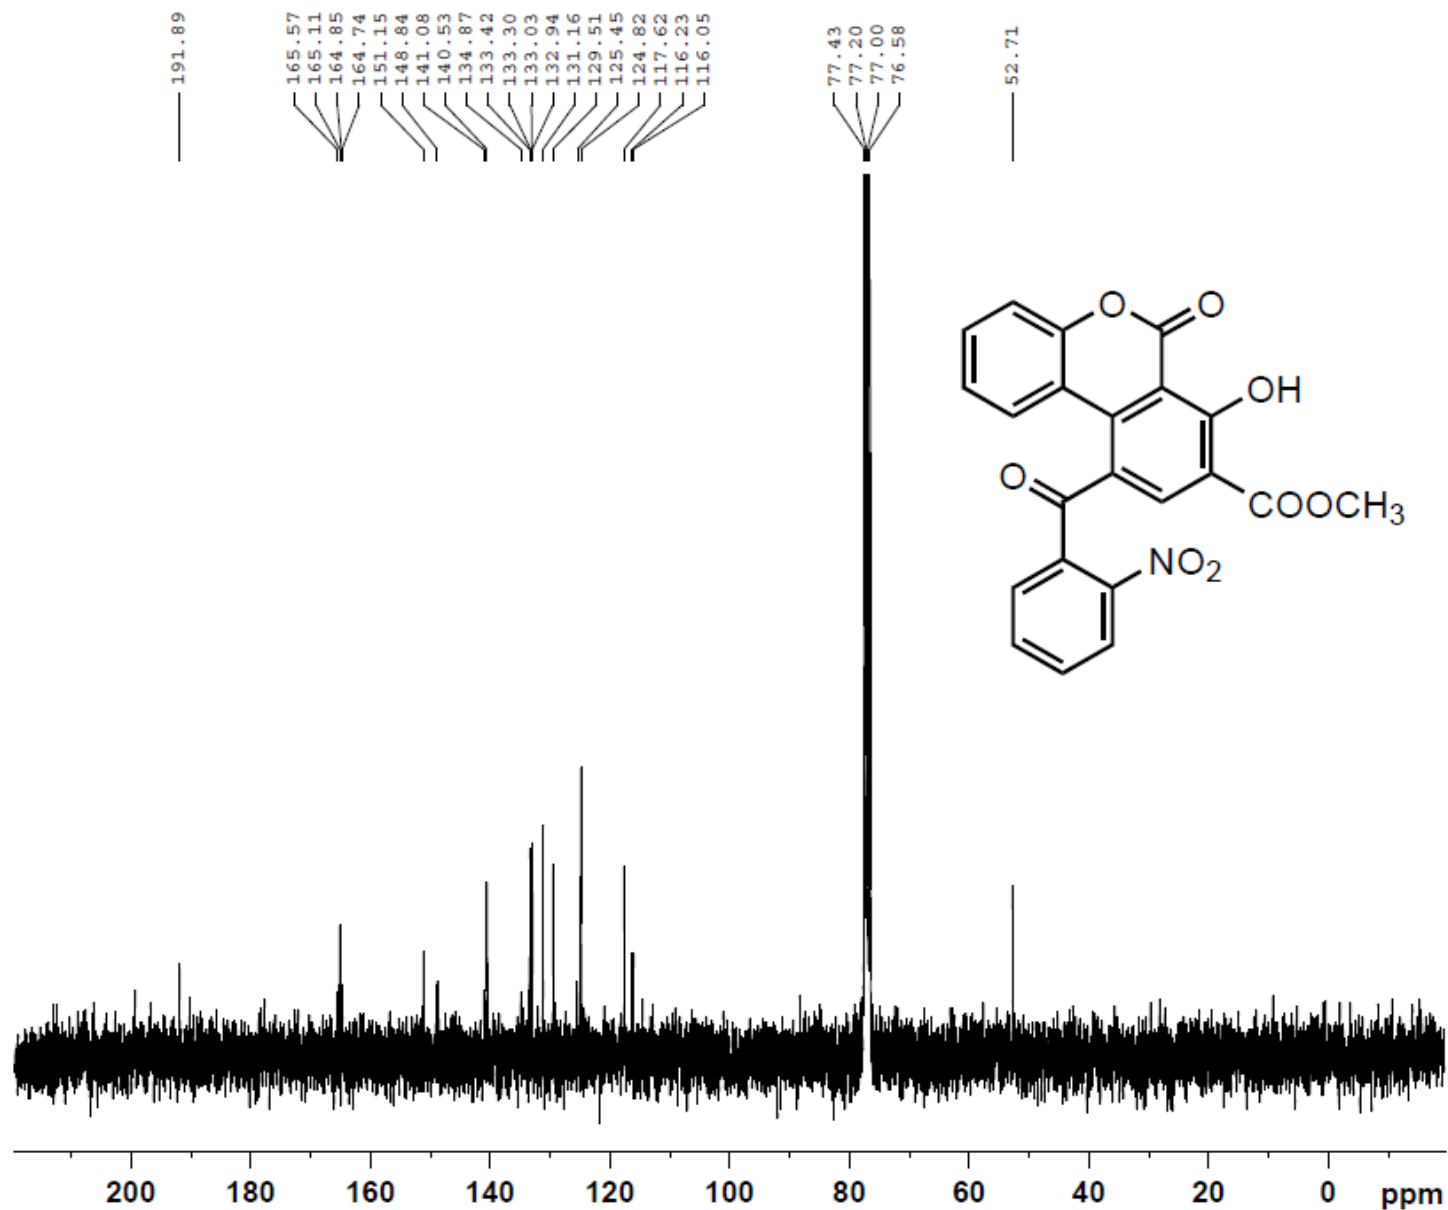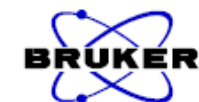

Current Data Parameters  
NAME 110811.u321 IS-149  
EXPNO 11  
PROCNO 1

F2 - Acquisition Parameters  
Date\_ 20110812  
Time 5.15  
INSTRUM spect  
PROBHD 5 mm PABBO BB-  
PULPROG zgpg30  
TD 65536  
SOLVENT CDCl3  
NS 1024  
DS 4  
SWH 18028.846 Hz  
FIDRES 0.275098 Hz  
AQ 1.8175818 sec  
RG 2050  
DW 27.733 usec  
DE 10.00 usec  
TE 298.2 K  
D1 2.00000000 sec  
D11 0.03000000 sec  
TD0 1

===== CHANNEL f1 =====  
NUC1 13C  
P1 10.00 usec  
PL1 -0.50 dB  
PL1W 33.25691986 W  
SFO1 75.4752953 MHz

===== CHANNEL f2 =====  
CPDPRG2 waltz16  
NUC2 1H  
PCPD2 72.00 usec  
PL2 0.00 dB  
PL12 17.00 dB  
PL13 17.00 dB  
PL2W 11.25325108 W  
PL12W 0.22453187 W  
PL13W 0.22453187 W  
SFO2 300.1312005 MHz

F2 - Processing parameters  
SI 32768  
SF 75.4677509 MHz  
WDW EM  
SSB 0  
LB 1.00 Hz  
GB 0  
PC 1.40

Savych, IS-153, DMSO, 1H

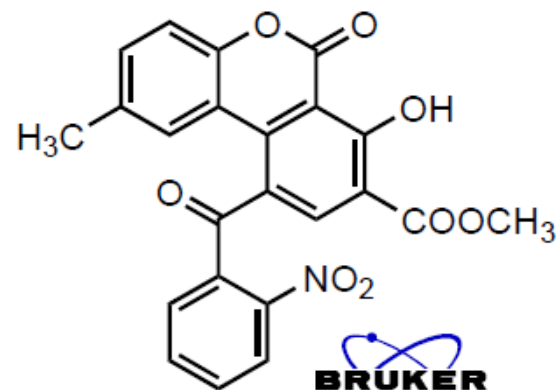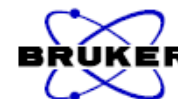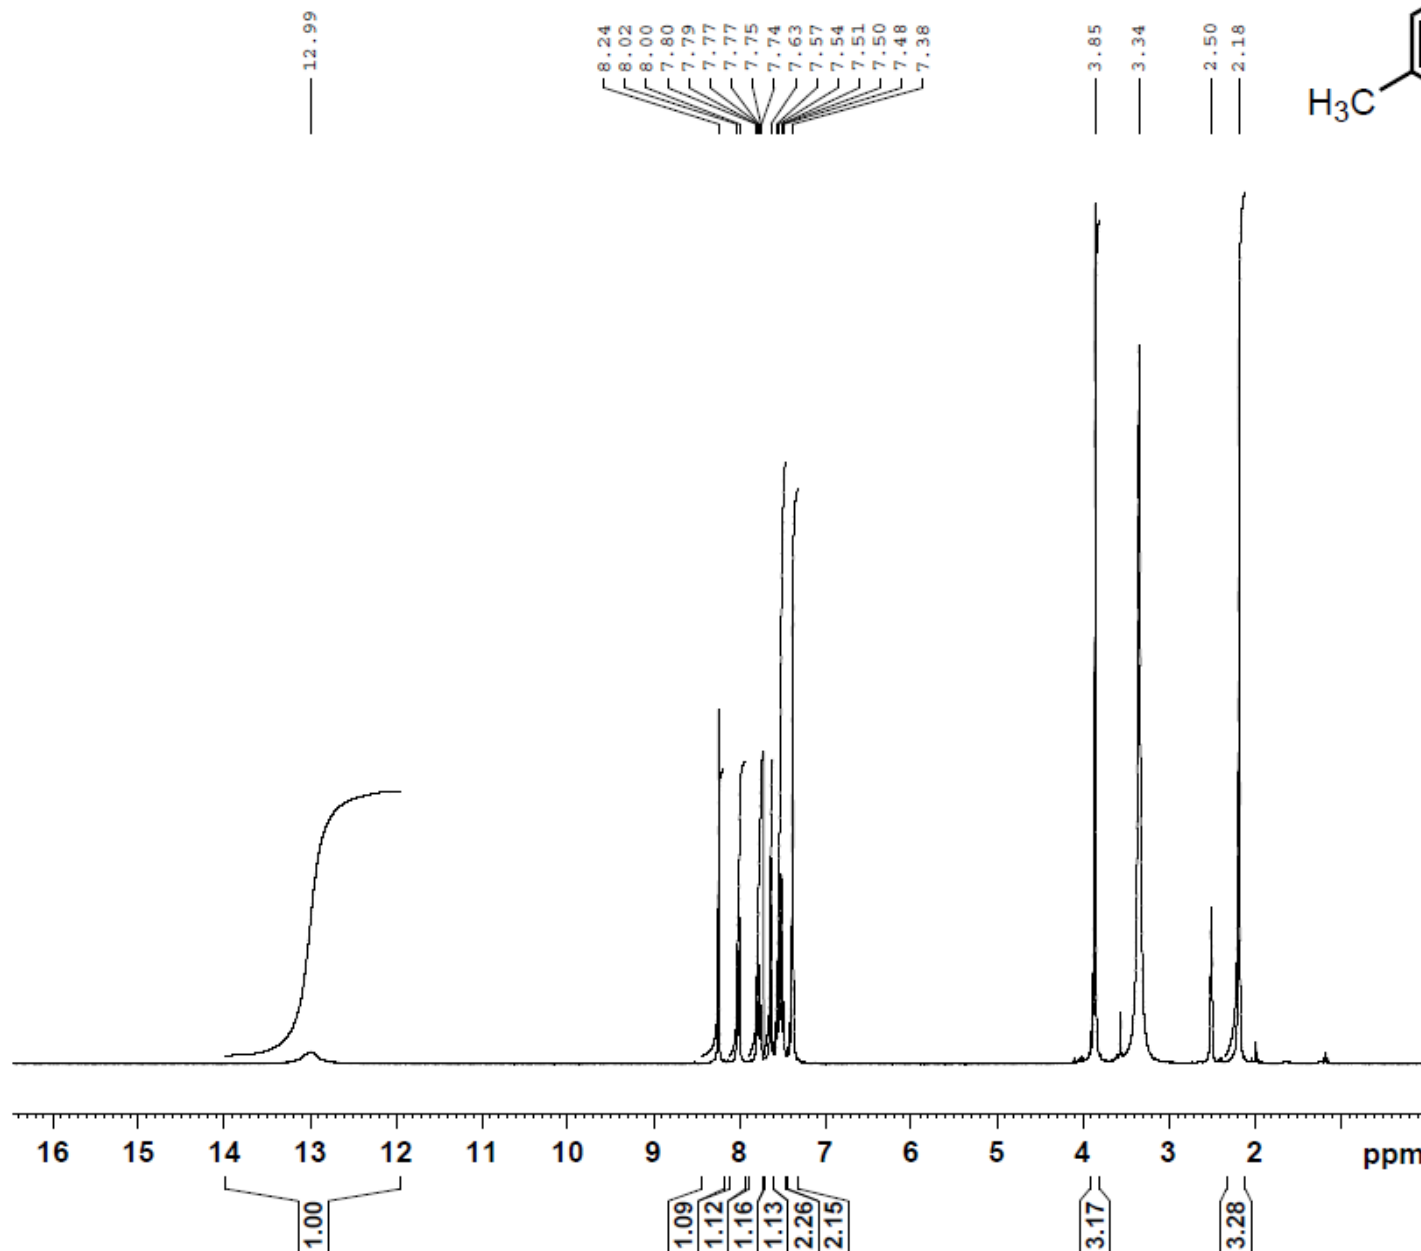

Current Data Parameters  
 NAME 110822.u320 IS-153  
 EXPNO 10  
 PROCNO 1

F2 - Acquisition Parameters  
 Date\_ 20110822  
 Time 15.00  
 INSTRUM spect  
 PROBHD 5 mm PABBO BB-  
 PULPROG zg30  
 TD 65536  
 SOLVENT DMSO  
 NS 16  
 DS 2  
 SWH 6188.119 Hz  
 FIDRES 0.094423 Hz  
 AQ 5.2953587 sec  
 RG 114  
 DW 80.800 usec  
 DE 10.00 usec  
 TE 298.2 K  
 D1 1.00000000 sec  
 TD0 1

===== CHANNEL f1 =====  
 NUC1 1H  
 P1 10.00 usec  
 PL1 0.00 dB  
 PL1W 11.25325108 W  
 SFO1 300.1318534 MHz

F2 - Processing parameters  
 SI 32768  
 SF 300.1300094 MHz  
 WDW EM  
 SSB 0  
 LB 0.30 Hz  
 GB 0  
 PC 1.00

Savych, IS153, DMSO, 13C

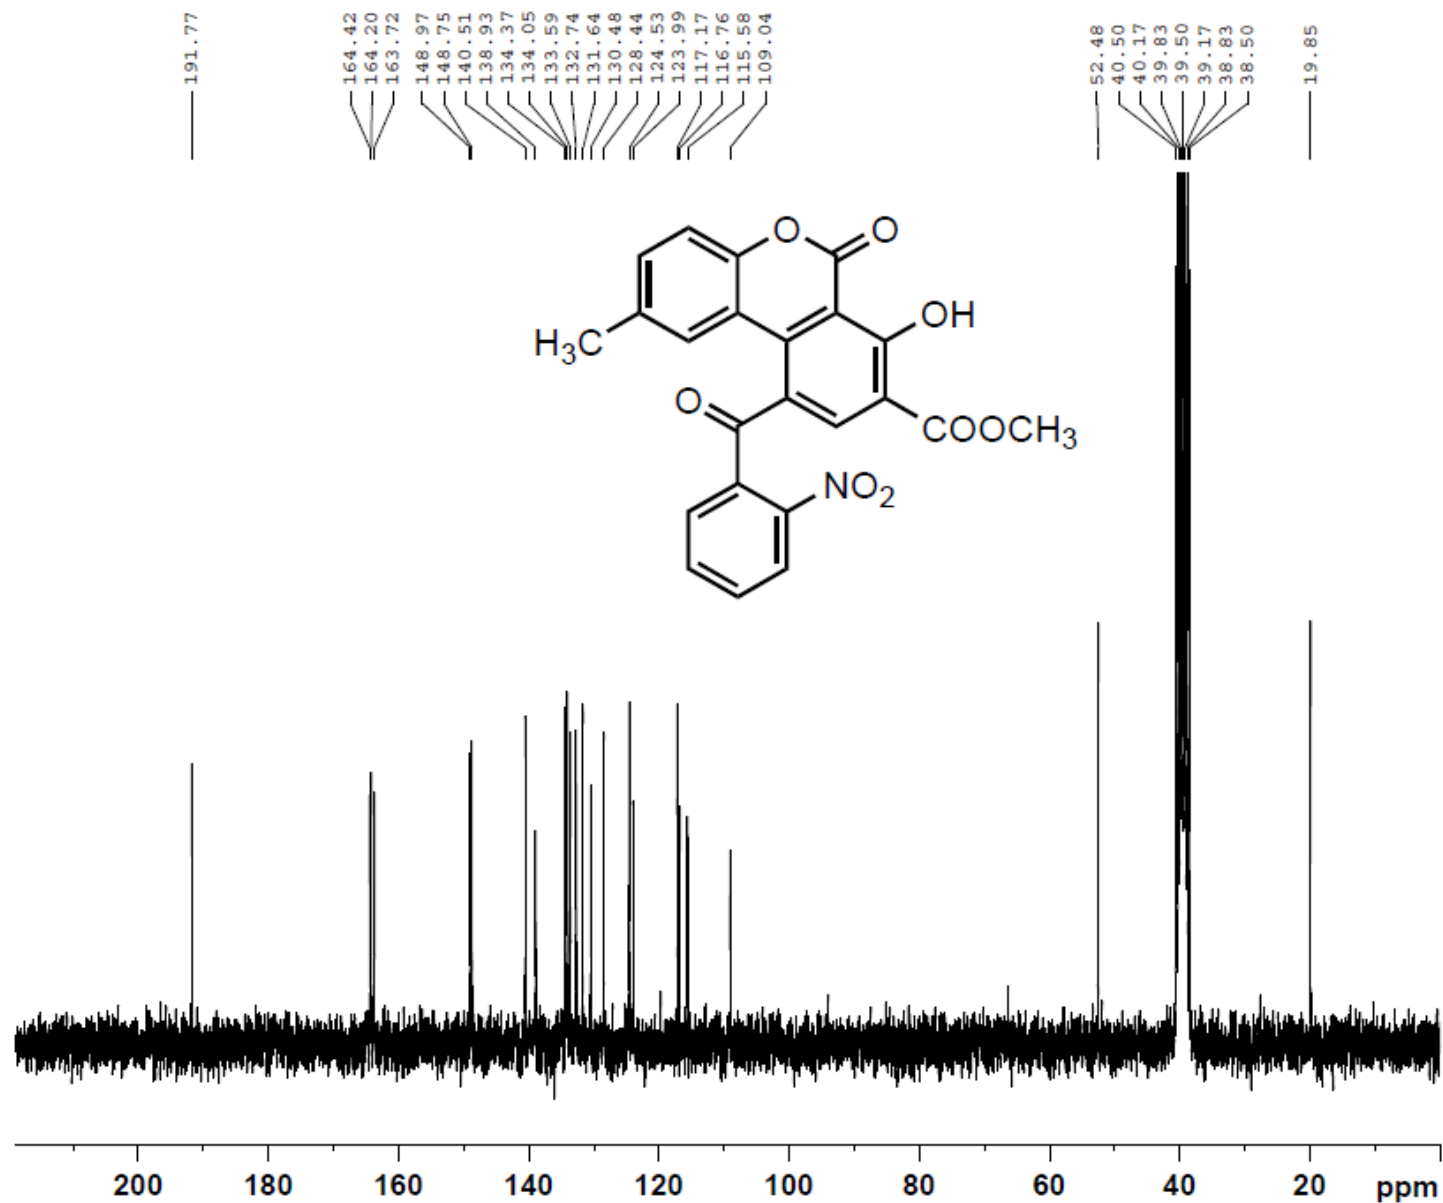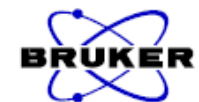

Current Data Parameters  
NAME 110822.205  
EXPNO 10  
PROCNO 1

F2 - Acquisition Parameters  
Date\_ 20110822  
Time 18.45  
INSTRUM spect  
PROBHD 5 mm PABBO BB-  
PULPROG zgpg30  
TD 65536  
SOLVENT DMSO  
NS 1024  
DS 4  
SWH 15000.000 Hz  
FIDRES 0.228882 Hz  
AQ 2.1845834 sec  
RG 2050  
DW 33.333 usec  
DE 10.00 usec  
TE 298.8 K  
D1 2.00000000 sec  
d11 0.03000000 sec  
DELTA 1.89999998 sec  
TD0 1

==== CHANNEL f1 =====  
NUC1 13C  
P1 10.00 usec  
PL1 -1.00 dB  
SFO1 62.9015280 MHz

==== CHANNEL f2 =====  
CPDPRG2 waltz16  
NUC2 1H  
PCPD2 70.00 usec  
PL12 15.00 dB  
PL13 15.00 dB  
PL2 -2.50 dB  
SFO2 250.1310005 MHz

F2 - Processing parameters  
SI 32768  
SF 62.8952683 MHz  
WDW EM  
SSB 0  
LB 1.00 Hz  
GB 0  
PC 1.40

Savych IS-162.2 1H DMSO

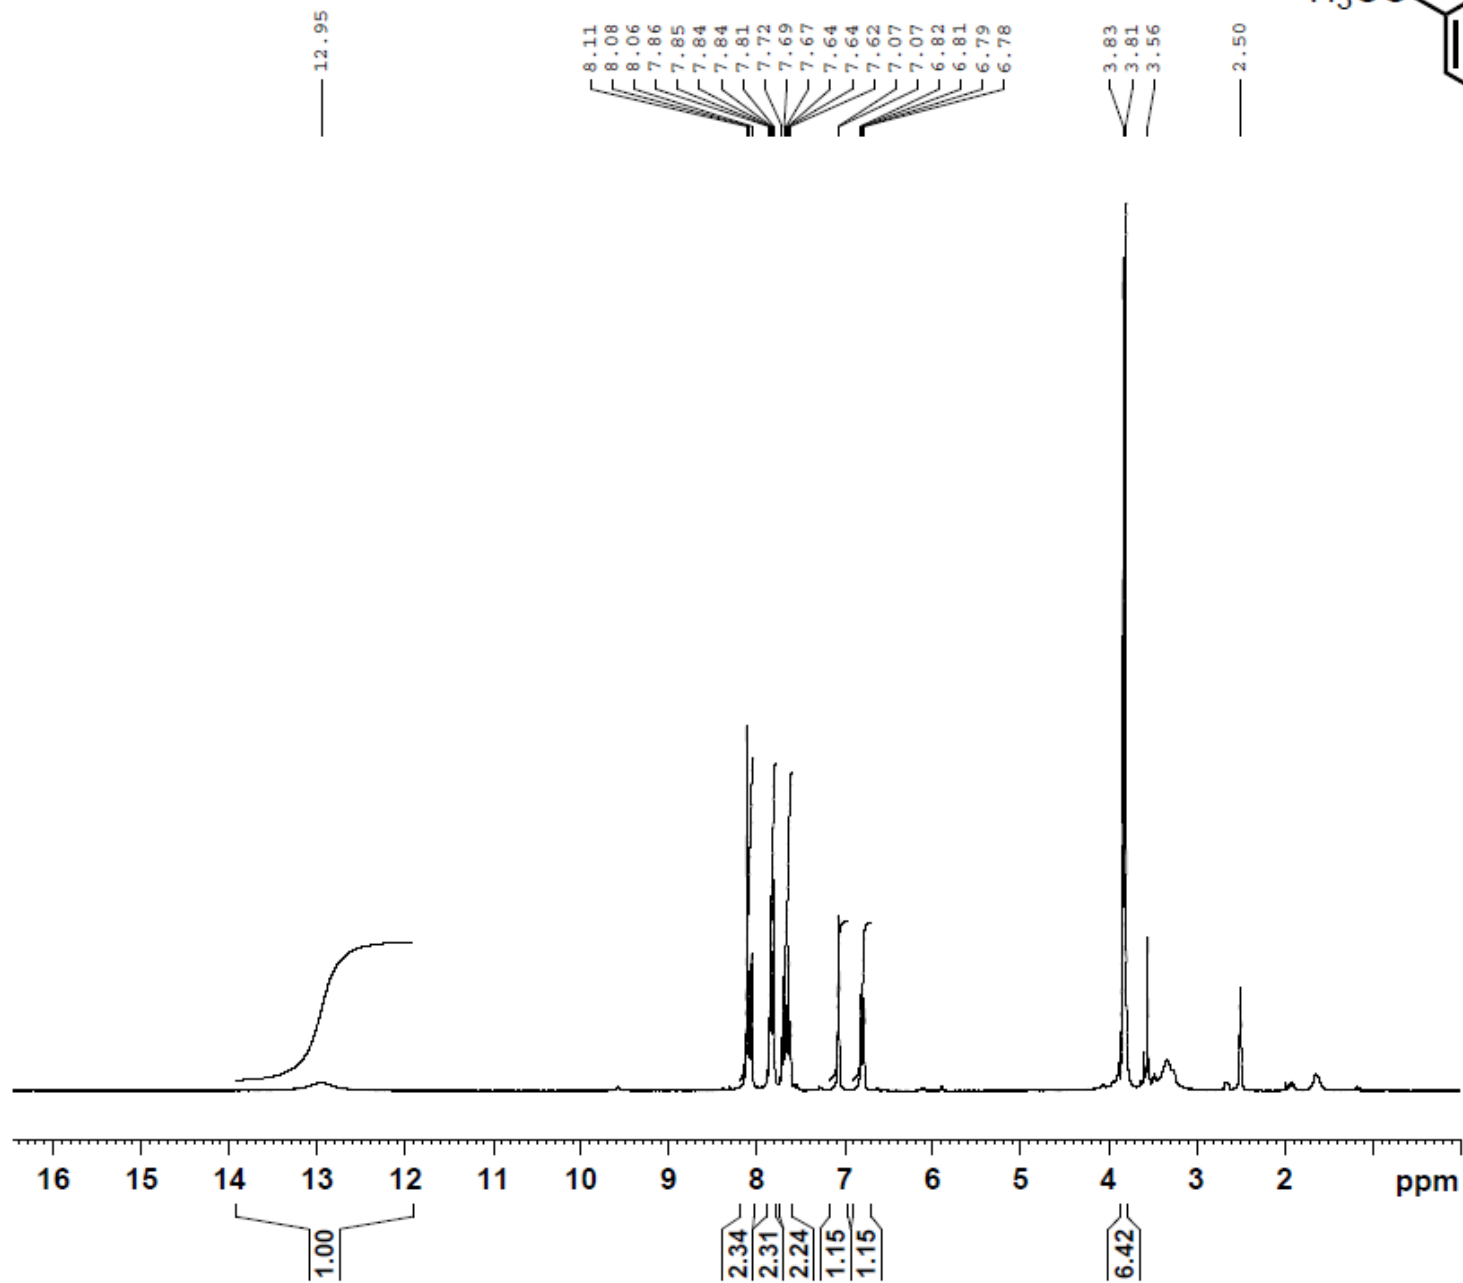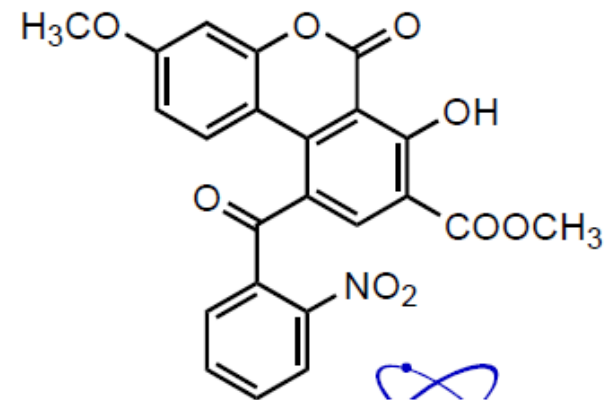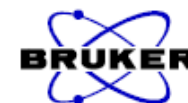

Current Data Parameters  
 NAME 110921.u324 IS-162.2  
 EXPNO 10  
 PROCNO 1

F2 - Acquisition Parameters  
 Date\_ 20110921  
 Time 15.32  
 INSTRUM spect  
 PROBHD 5 mm PABBO BB-  
 PULPROG zg30  
 TD 65536  
 SOLVENT DMSO  
 NS 16  
 DS 2  
 SWH 6188.119 Hz  
 FIDRES 0.094423 Hz  
 AQ 5.2953587 sec  
 RG 114  
 DW 80.800 usec  
 DE 10.00 usec  
 TE 297.4 K  
 D1 1.00000000 sec  
 TD0 1

===== CHANNEL f1 =====  
 NUC1 1H  
 P1 10.00 usec  
 PL1 0.00 dB  
 PL1W 11.25325108 W  
 SFO1 300.1318534 MHz

F2 - Processing parameters  
 SI 32768  
 SF 300.1300104 MHz  
 WDW EM  
 SSB 0  
 LB 0.30 Hz  
 GB 0  
 PC 1.00

Savych IS-162.2 13C DMSO

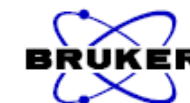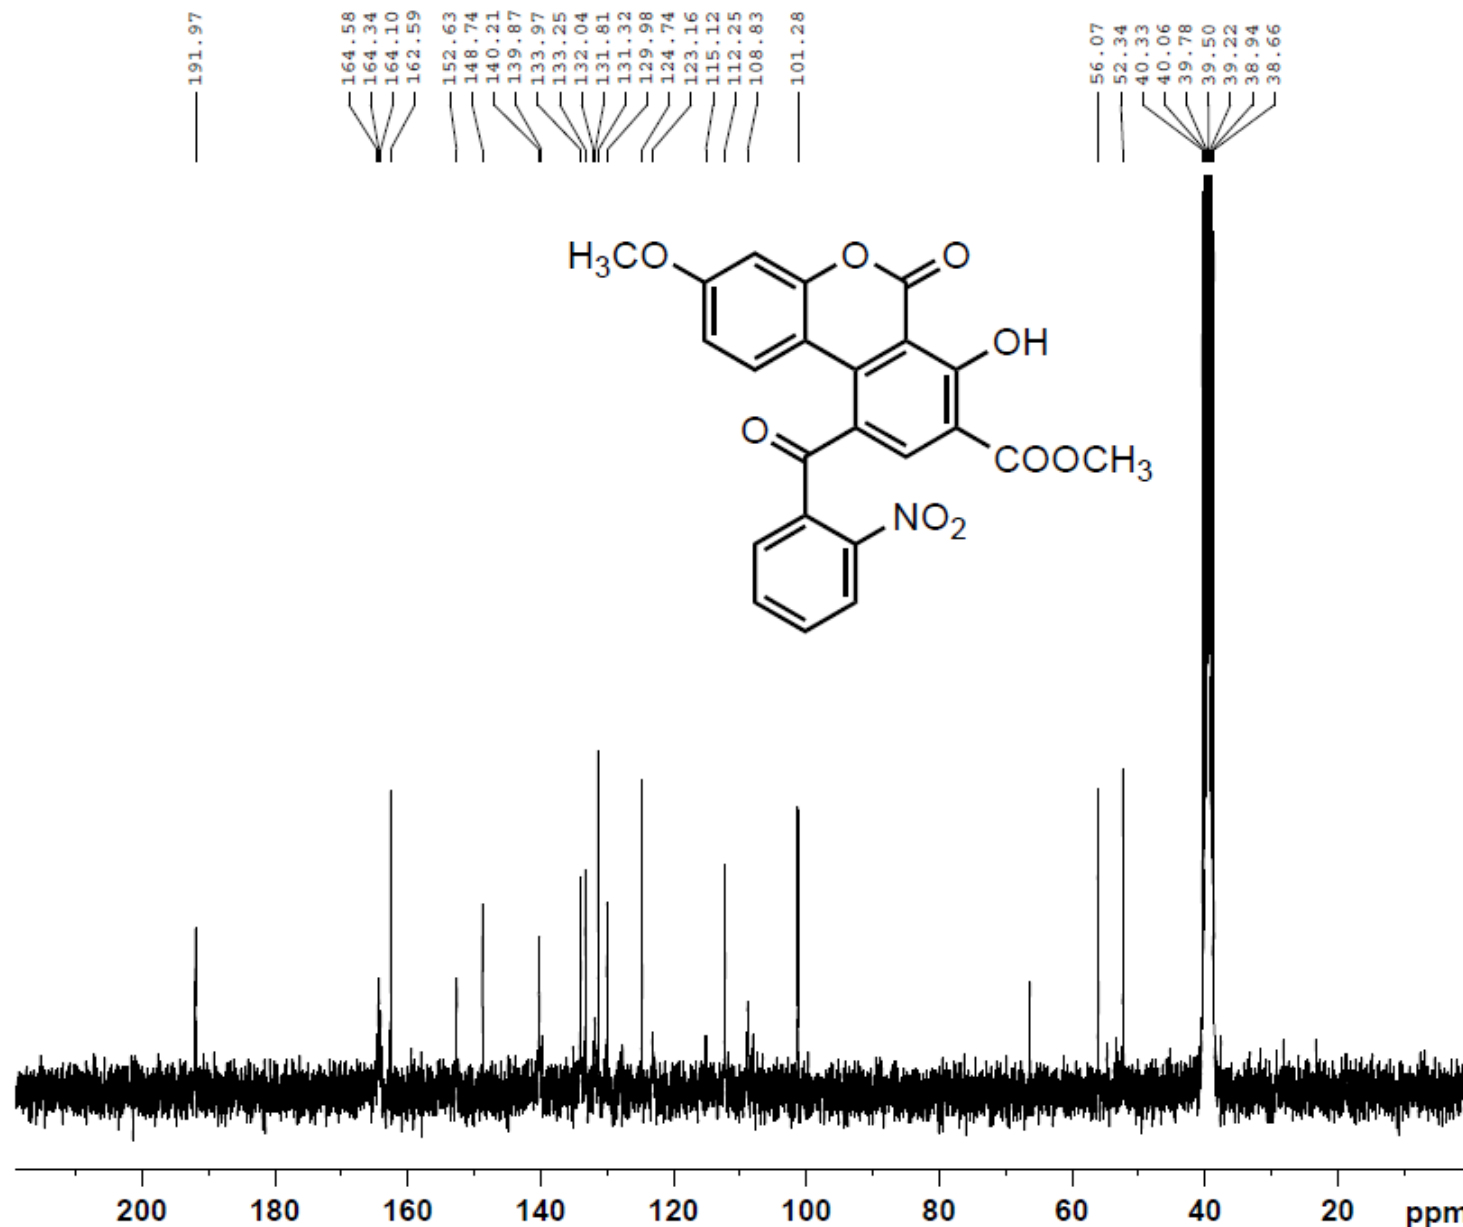

Current Data Parameters  
NAME 110921.u324 IS-162.2  
EXPNO 12  
PROCNO 1

F2 - Acquisition Parameters  
Date\_ 20110921  
Time 17.06  
INSTRUM spect  
PROBHD 5 mm PABBO BB-  
PULPROG zgpg30  
TD 65536  
SOLVENT DMSO  
NS 1024  
DS 4  
SWH 18028.846 Hz  
FIDRES 0.275098 Hz  
AQ 1.8175818 sec  
RG 2050  
DW 27.733 usec  
DE 10.00 usec  
TE 298.4 K  
D1 2.0000000 sec  
D11 0.03000000 sec  
TD0 1

===== CHANNEL f1 =====  
NUC1 13C  
P1 10.00 usec  
PL1 -0.50 dB  
PL1W 33.25691986 W  
SFO1 75.4752953 MHz

===== CHANNEL f2 =====  
CPDPRG2 waltz16  
NUC2 1H  
PCPD2 72.00 usec  
PL2 0.00 dB  
PL12 17.00 dB  
PL13 17.00 dB  
PL2W 11.25325108 W  
PL12W 0.22453187 W  
PL13W 0.22453187 W  
SFO2 300.1312005 MHz

F2 - Processing parameters  
SI 32768  
SF 75.4677898 MHz  
WDW EM  
SSB 0  
LB 1.00 Hz  
GB 0  
PC 1.40

Savych IS-200.2 1H DMSO

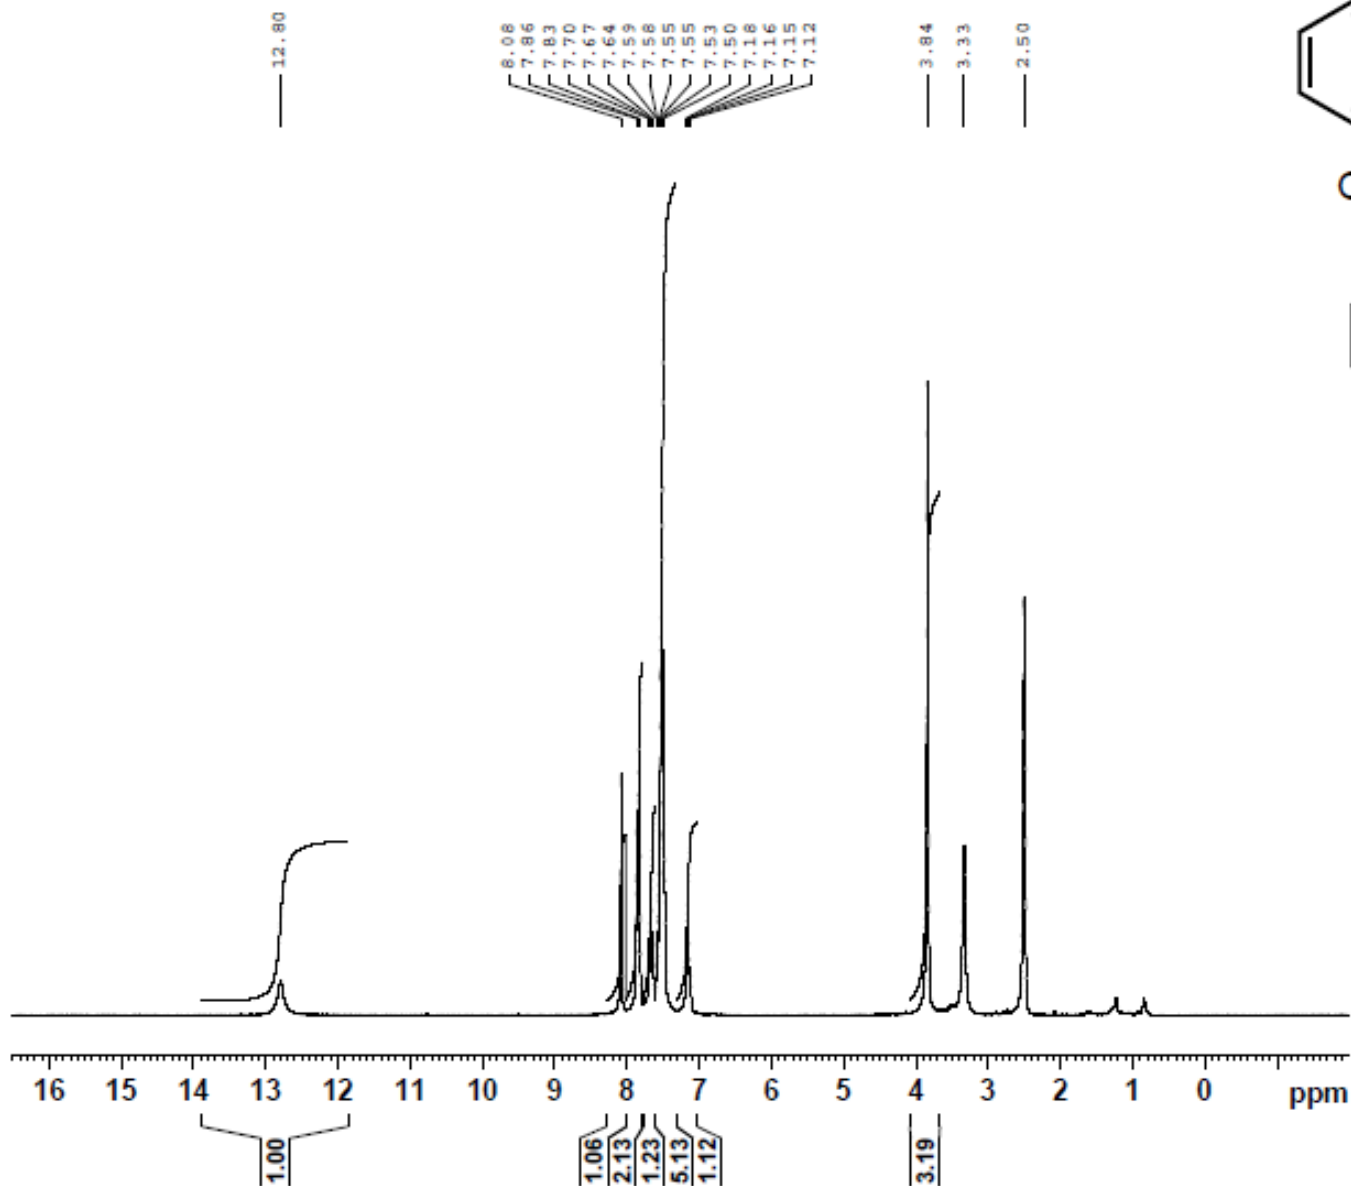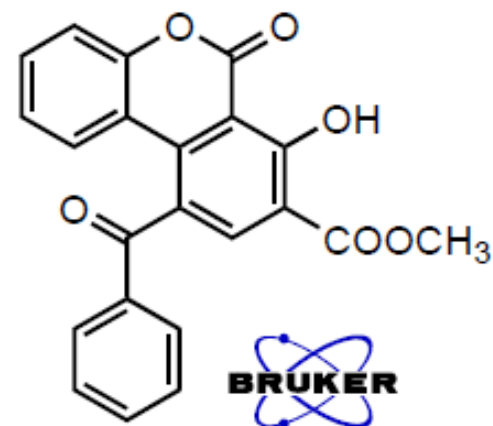

Current Data Parameters

NAME 120322.205  
 EXPNO 10  
 PROCNO 1

F2 - Acquisition Parameters

Date\_ 20120322  
 Time\_ 8.47  
 INSTRUM spect  
 PROBHD 5 mm PABBO BB-  
 PULPROG zg30  
 TD 65536  
 SOLVENT DMSO  
 NS 16  
 DS 2  
 SWH 5165.289 Hz  
 FIDRES 0.078816 Hz  
 AQ 6.3439350 sec  
 RG 645  
 DW 96.800 usec  
 DE 10.00 usec  
 TE 298.2 K  
 D1 1.00000000 sec  
 TD0 1

==== CHANNEL f1 =====

NUC1 1H  
 P1 10.00 usec  
 PL1 -2.50 dB  
 SFO1 250.1315447 MHz

F2 - Processing parameters

SI 32768  
 SF 250.1299979 MHz  
 WDW EM  
 SSB 0  
 LB 0.30 Hz  
 GB 0  
 PC 1.00

Savych IS-200.2 13C DMSO

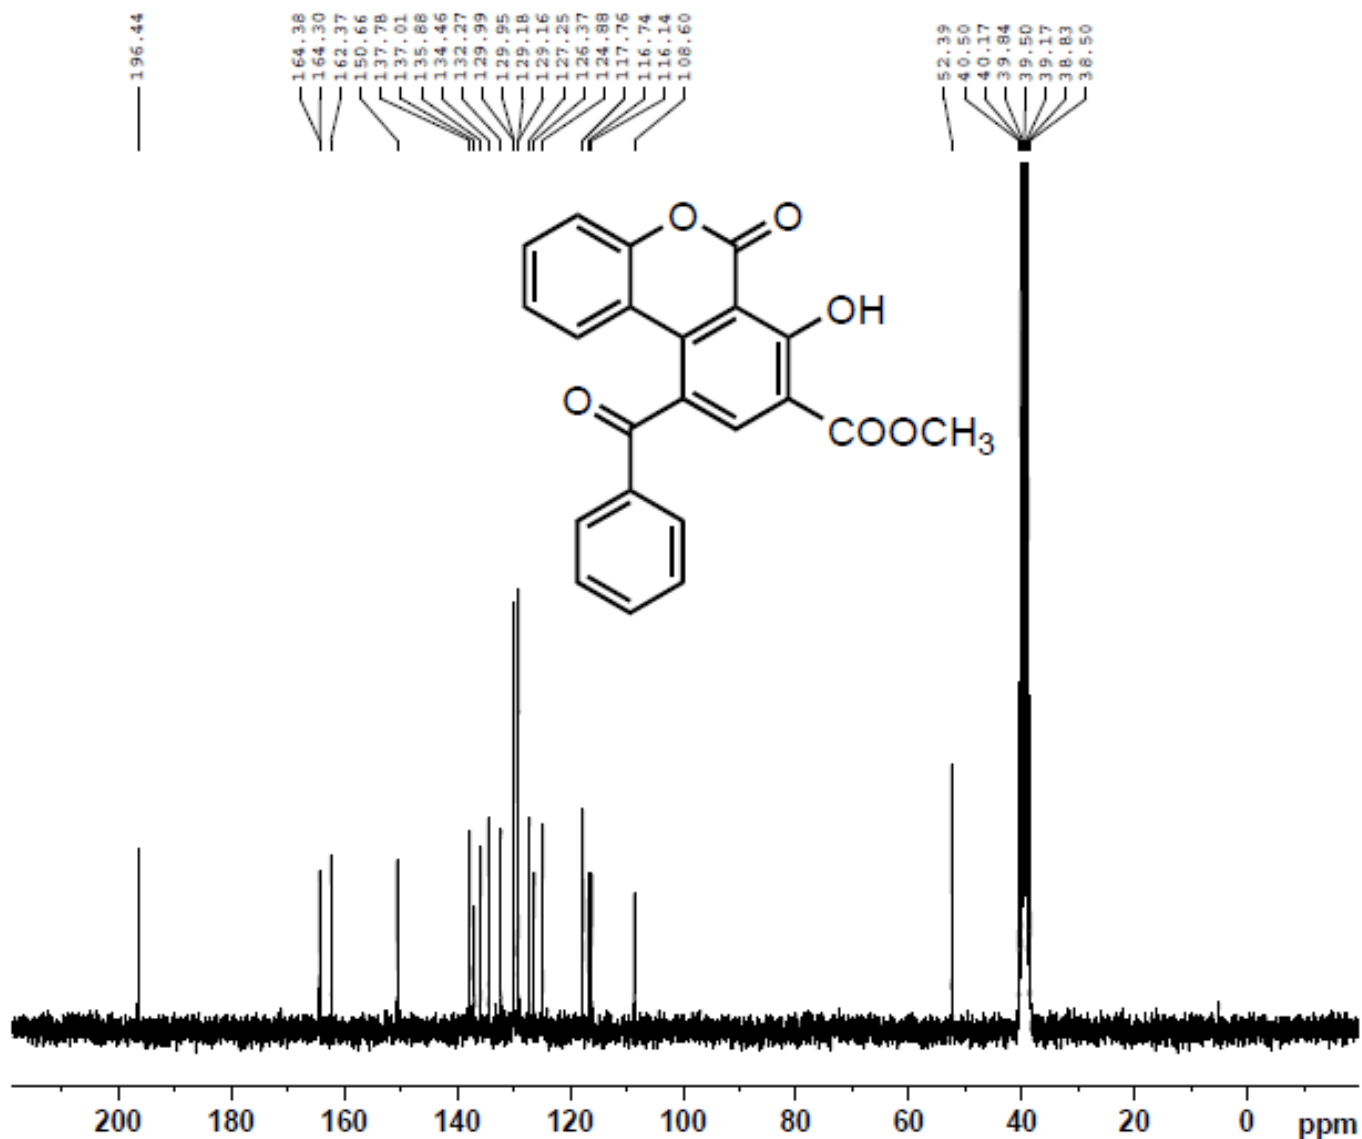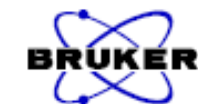

Current Data Parameters  
NAME 120322.205  
EXPNO 11  
PROCNO 1

F2 - Acquisition Parameters  
Date\_ 20120322  
Time 10.01  
INSTRUM spect  
PROBHD 5 mm PABBO BB-  
PULPROG zgpg30  
TD 65536  
SOLVENT DMSO  
NS 1024  
DS 4  
SWH 15000.000 Hz  
FIDRES 0.228882 Hz  
AQ 2.1845834 sec  
RG 2050  
DW 33.333 usec  
DE 10.00 usec  
TE 297.9 K  
D1 2.00000000 sec  
d11 0.03000000 sec  
DELTA 1.89999998 sec  
TD0 1

==== CHANNEL f1 =====  
NUC1 13C  
P1 10.00 usec  
PL1 -1.00 dB  
SFO1 62.9015280 MHz

==== CHANNEL f2 =====  
CPDPRG2 waltz16  
NUC2 1H  
PCPD2 70.00 usec  
PL12 15.00 dB  
PL13 15.00 dB  
PL2 -2.50 dB  
SFO2 250.1310005 MHz

F2 - Processing parameters  
SI 32768  
SF 62.8952687 MHz  
WDW EM  
SSB 0  
LB 1.00 Hz  
GB 0  
PC 1.40



Savych IS-173 1H DMSO

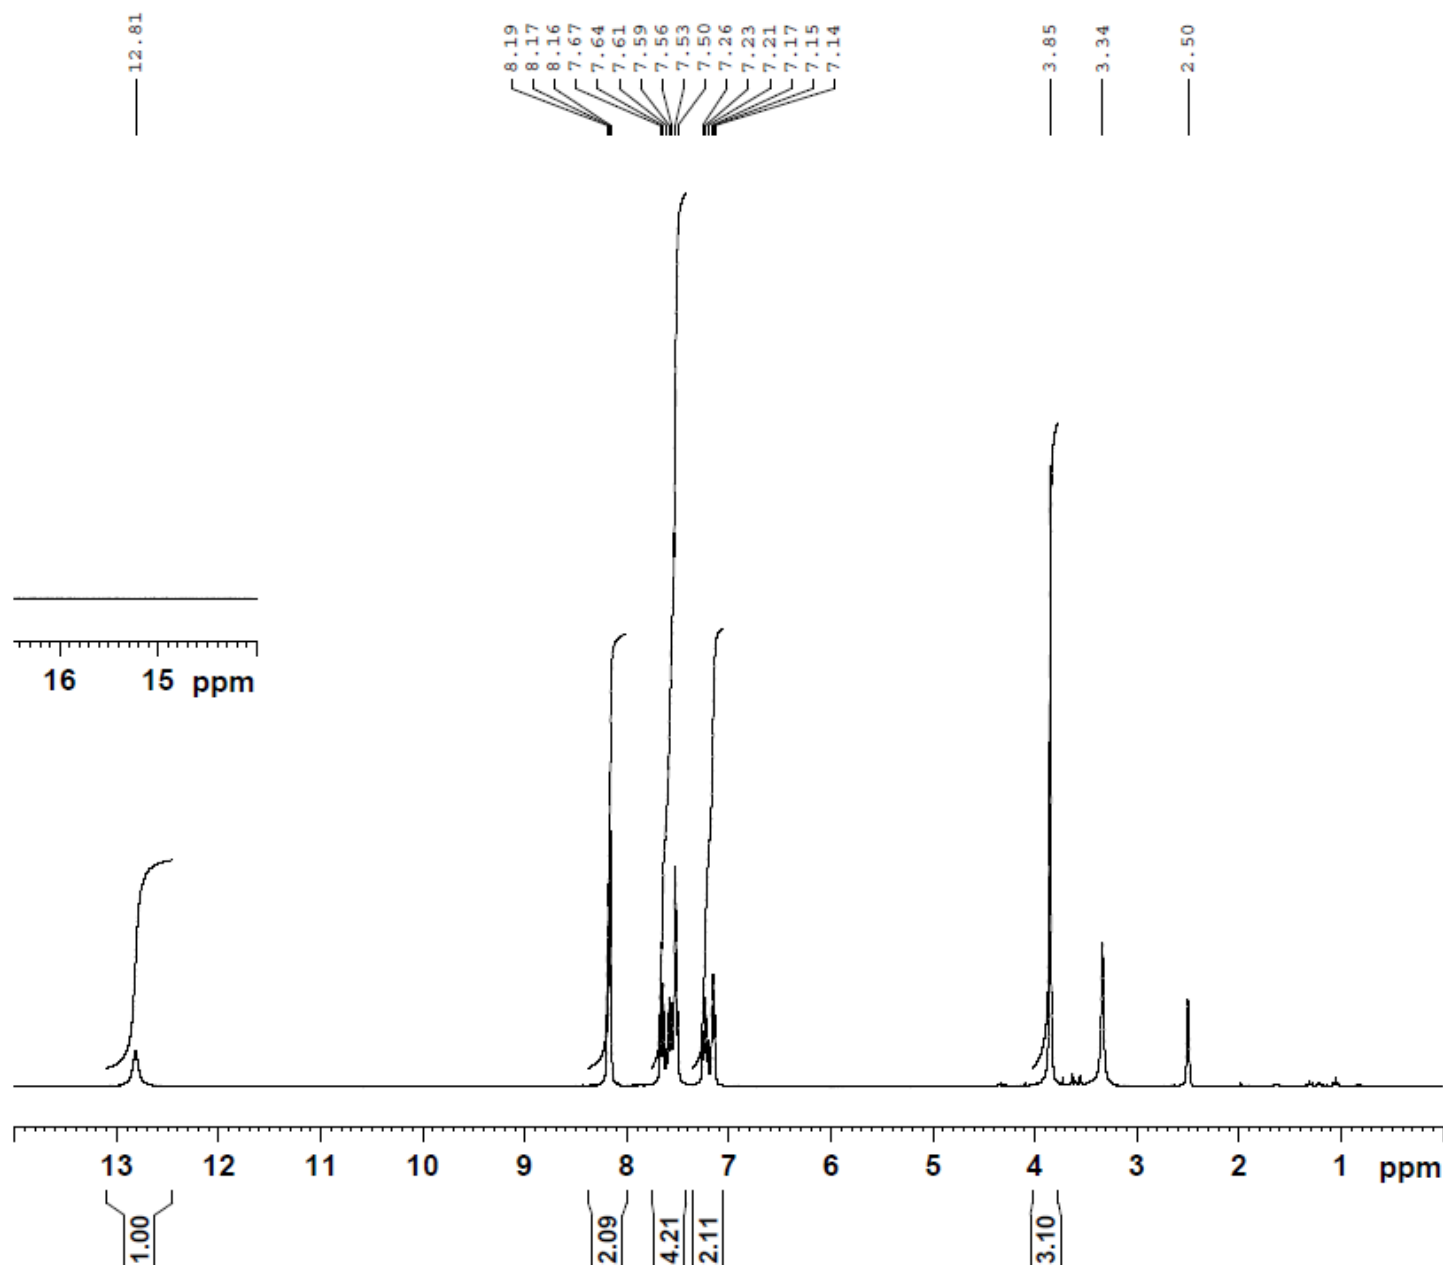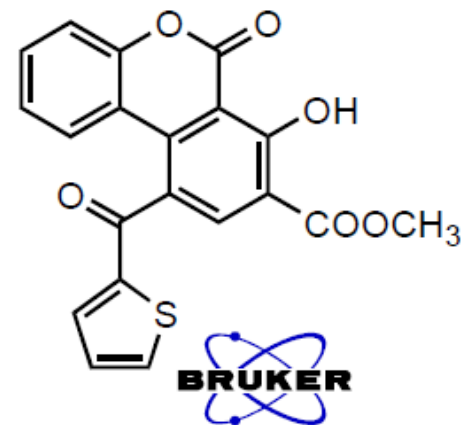

Current Data Parameters  
 NAME 111020.u312 IS-173  
 EXPNO 10  
 PROCNO 1

F2 - Acquisition Parameters  
 Date\_ 20111020  
 Time 10.42  
 INSTRUM spect  
 PROBHD 5 mm PABBO BB-  
 PULPROG zg30  
 TD 65536  
 SOLVENT DMSO  
 NS 16  
 DS 2  
 SWH 6188.119 Hz  
 FIDRES 0.094423 Hz  
 AQ 5.2953587 sec  
 RG 128  
 DW 80.800 usec  
 DE 10.00 usec  
 TE 295.6 K  
 D1 1.00000000 sec  
 TD0 1

===== CHANNEL f1 =====  
 NUC1 1H  
 P1 10.00 usec  
 PL1 0.00 dB  
 PL1W 11.25325108 W  
 SFO1 300.1318534 MHz

F2 - Processing parameters  
 SI 32768  
 SF 300.1300086 MHz  
 WDW EM  
 SSB 0  
 LB 0.30 Hz  
 GB 0  
 PC 1.00

Savych IS-173 13C DMSO

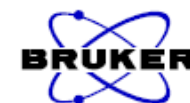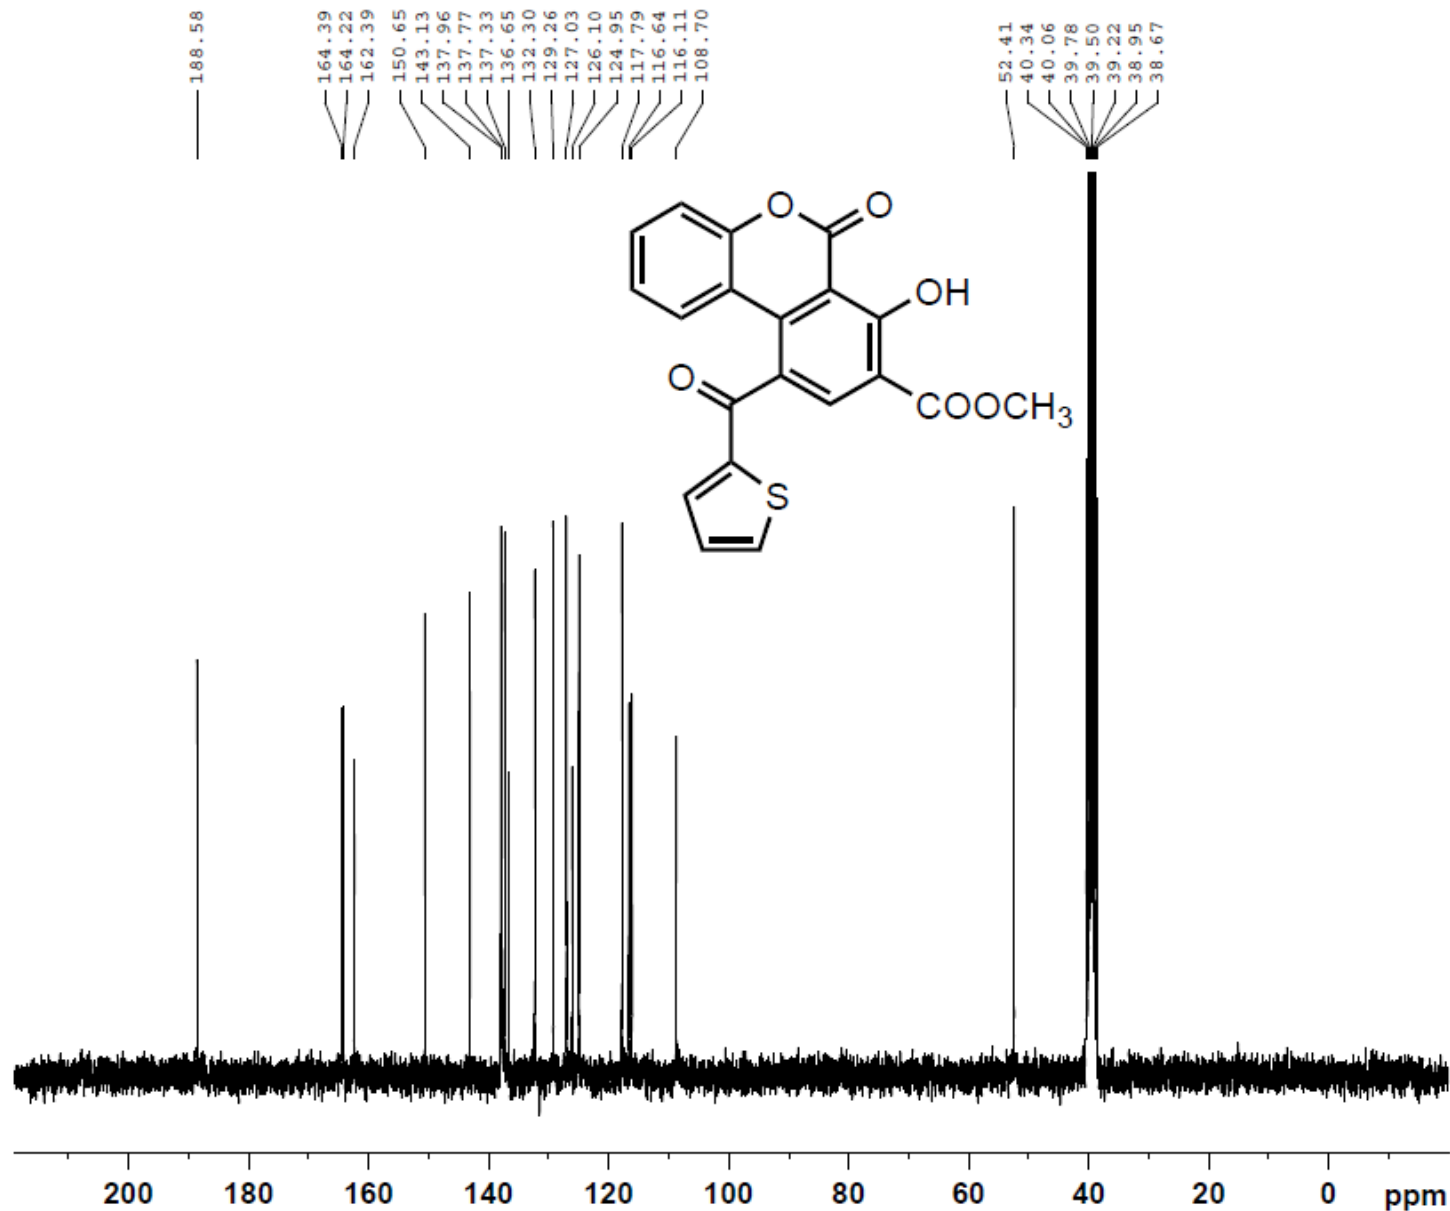

Current Data Parameters  
 NAME 111020.u312 IS-173  
 EXPNO 11  
 PROCNO 1

F2 - Acquisition Parameters  
 Date\_ 20111020  
 Time 23.23  
 INSTRUM spect  
 PROBHD 5 mm PABBO BB-  
 PULPROG zgpg30  
 TD 65536  
 SOLVENT DMSO  
 NS 1024  
 DS 4  
 SWH 18028.846 Hz  
 FIDRES 0.275098 Hz  
 AQ 1.8175818 sec  
 RG 2050  
 DW 27.733 usec  
 DE 10.00 usec  
 TE 298.2 K  
 D1 2.00000000 sec  
 D11 0.03000000 sec  
 TD0 1

===== CHANNEL f1 =====  
 NUC1 13C  
 P1 10.00 usec  
 PL1 -0.50 dB  
 PL1W 33.25691986 W  
 SFO1 75.4752953 MHz

===== CHANNEL f2 =====  
 CPDPRG2 waltz16  
 NUC2 1H  
 PCPD2 72.00 usec  
 PL2 0.00 dB  
 PL12 17.00 dB  
 PL13 17.00 dB  
 PL2W 11.25325108 W  
 PL12W 0.22453187 W  
 PL13W 0.22453187 W  
 SFO2 300.1312005 MHz

F2 - Processing parameters  
 SI 32768  
 SF 75.4677876 MHz  
 WDW EM  
 SSB 0  
 LB 1.00 Hz  
 GB 0  
 PC 1.40

Savych IS-93 1H DMSO

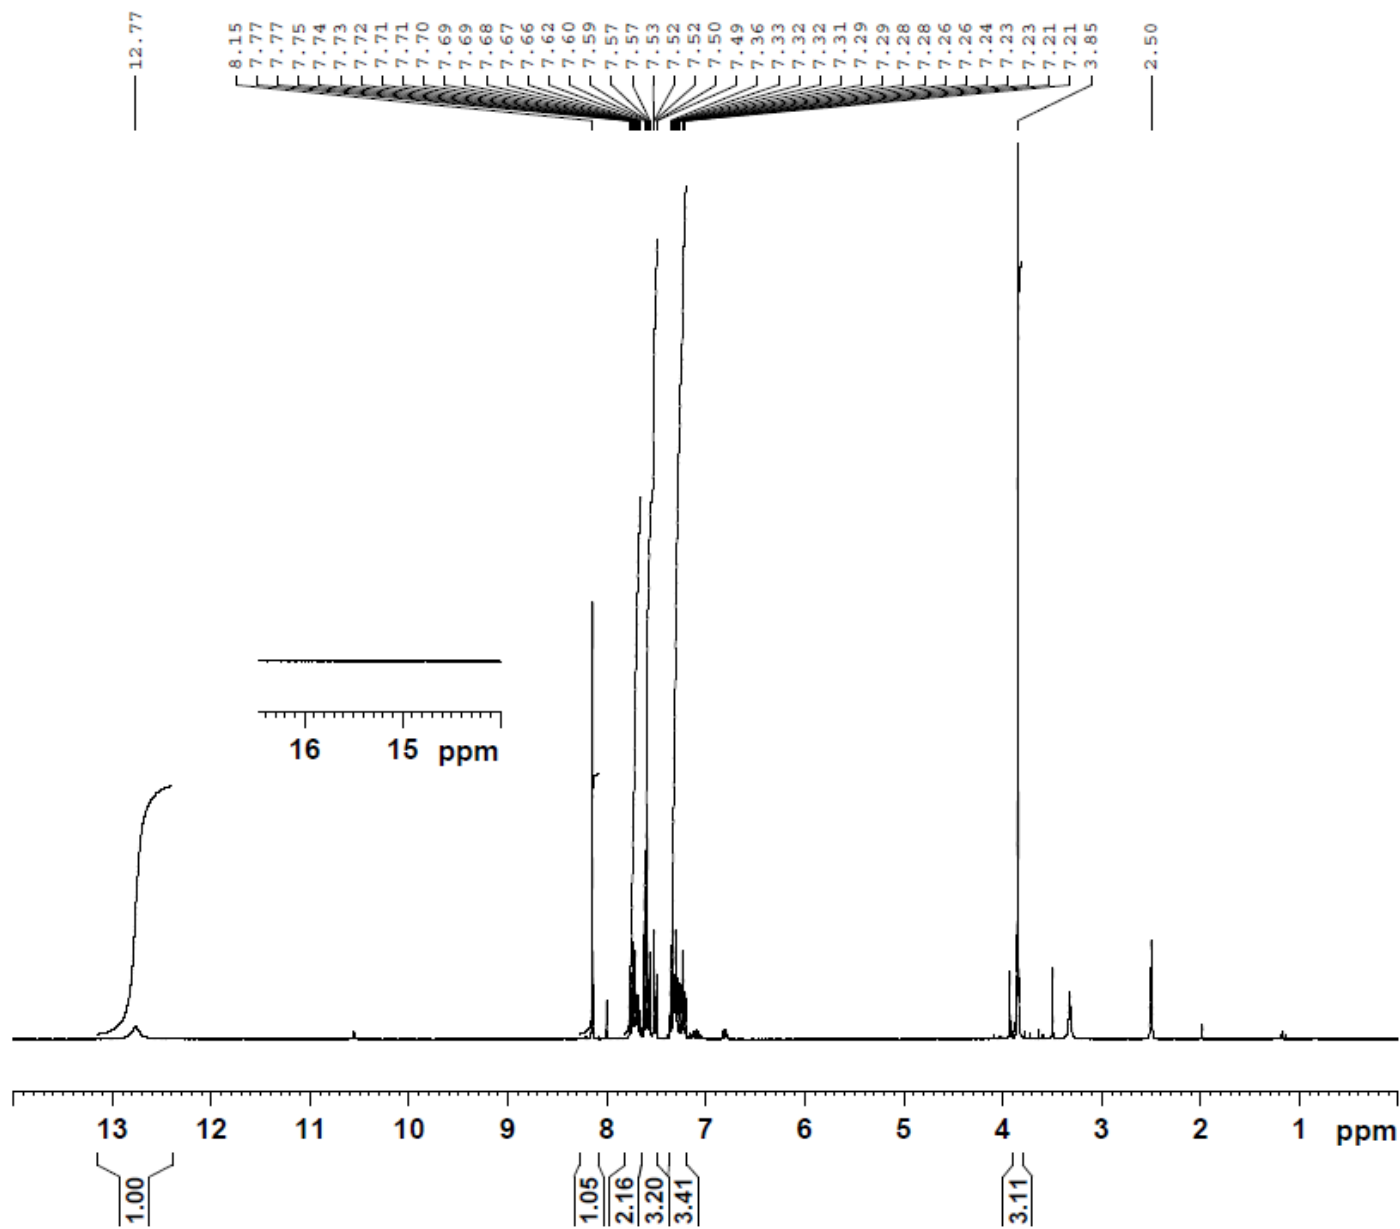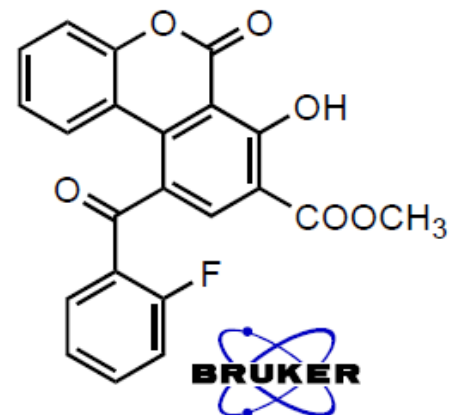

Current Data Parameters

NAME 111116.u309 IS-93  
 EXPNO 10  
 PROCNO 1

F2 - Acquisition Parameters

Date\_ 20111116  
 Time 8.44  
 INSTRUM spect  
 PROBHD 5 mm PABBO BB-  
 PULPROG zg30  
 TD 65536  
 SOLVENT DMSO  
 NS 16  
 DS 2  
 SWH 6188.119 Hz  
 FIDRES 0.094423 Hz  
 AQ 5.2953587 sec  
 RG 144  
 DW 80.800 usec  
 DE 10.00 usec  
 TE 298.2 K  
 D1 1.00000000 sec  
 TD0 1

===== CHANNEL f1 =====

NUC1 1H  
 P1 10.00 usec  
 PL1 0.00 dB  
 PL1W 11.25325108 W  
 SFO1 300.1318534 MHz

F2 - Processing parameters

SI 32768  
 SF 300.1300054 MHz  
 WDW EM  
 SSB 0  
 LB 0.30 Hz  
 GB 0  
 PC 1.00

Savych IS-93 13C DMSO

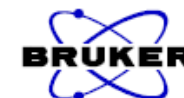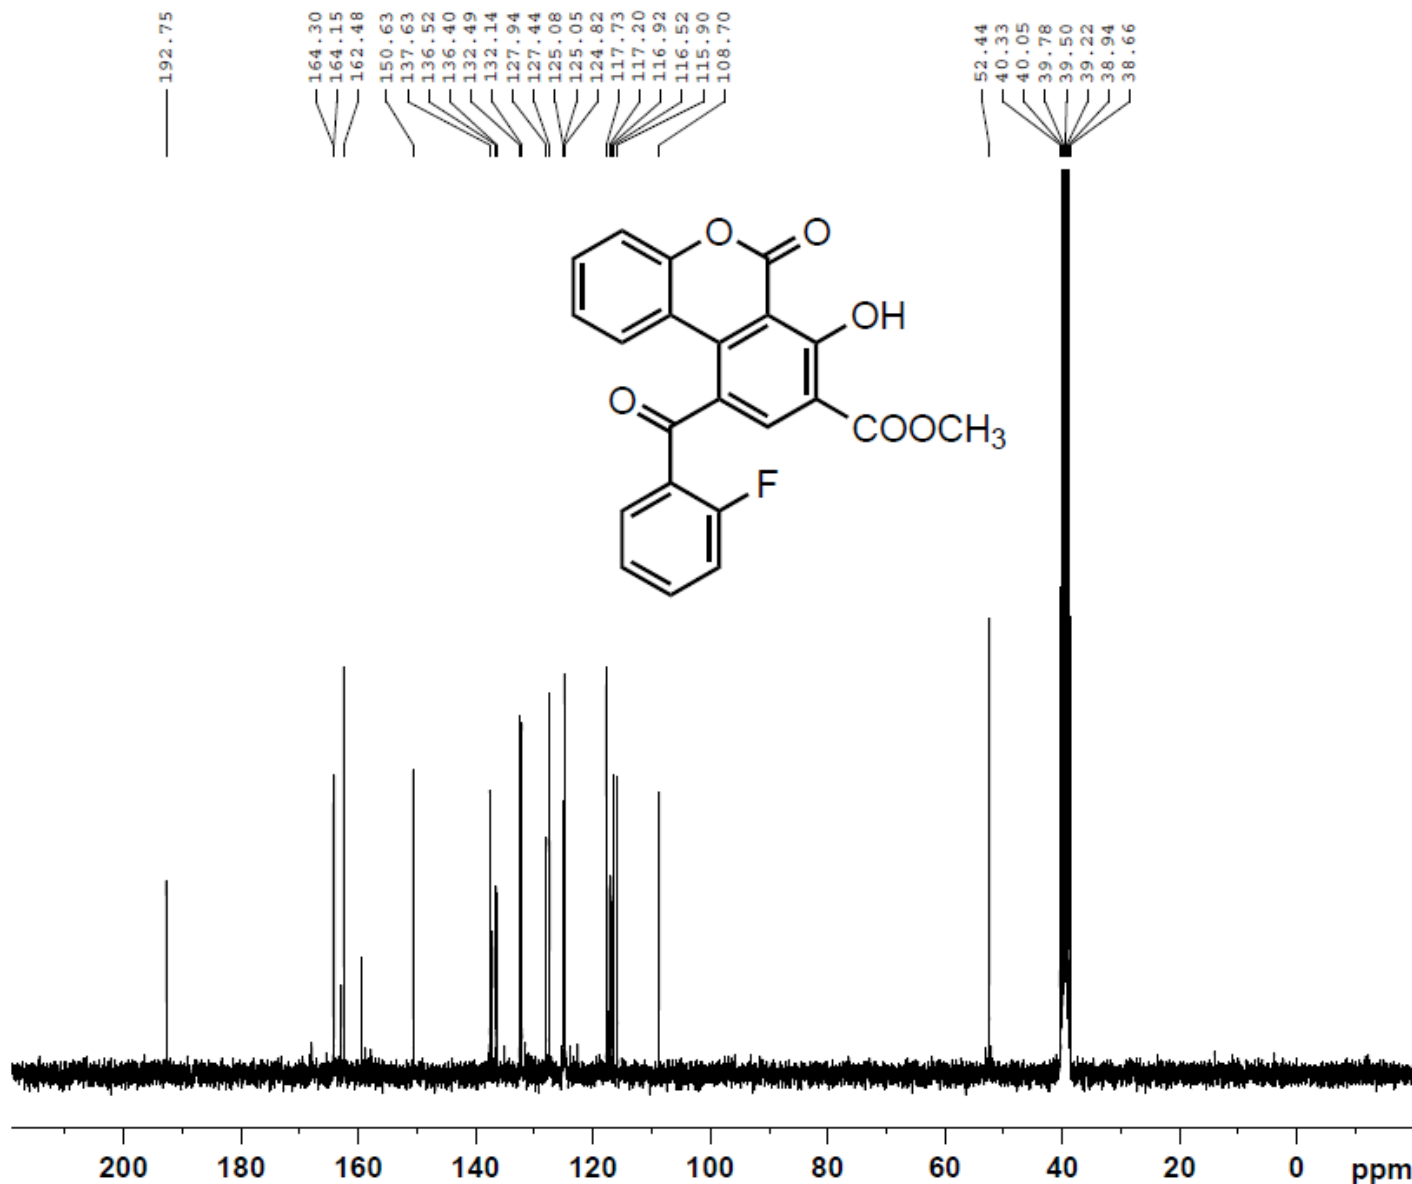

Current Data Parameters  
NAME 111116.u309 IS-93  
EXPNO 11  
PROCNO 1

F2 - Acquisition Parameters  
Date\_ 20111116  
Time 21.54  
INSTRUM spect  
PROBHD 5 mm PABBO BB-  
PULPROG zgpg30  
TD 65536  
SOLVENT DMSO  
NS 1024  
DS 4  
SWH 18028.846 Hz  
FIDRES 0.275098 Hz  
AQ 1.8175818 sec  
RG 2050  
DW 27.733 usec  
DE 10.00 usec  
TE 298.2 K  
D1 2.00000000 sec  
D11 0.03000000 sec  
TD0 1

===== CHANNEL f1 =====  
NUC1 13C  
P1 10.00 usec  
PL1 -0.50 dB  
PL1W 33.25691986 W  
SFO1 75.4752953 MHz

===== CHANNEL f2 =====  
CPDPRG2 waltz16  
NUC2 1H  
PCPD2 72.00 usec  
PL2 0.00 dB  
PL12 17.00 dB  
PL13 17.00 dB  
PL2W 11.25325108 W  
PL12W 0.22453187 W  
PL13W 0.22453187 W  
SFO2 300.1312005 MHz

F2 - Processing parameters  
SI 32768  
SF 75.4677876 MHz  
WDW EM  
SSB 0  
LB 1.00 Hz  
GB 0  
PC 1.40

Savych IS-93 19F CDC13

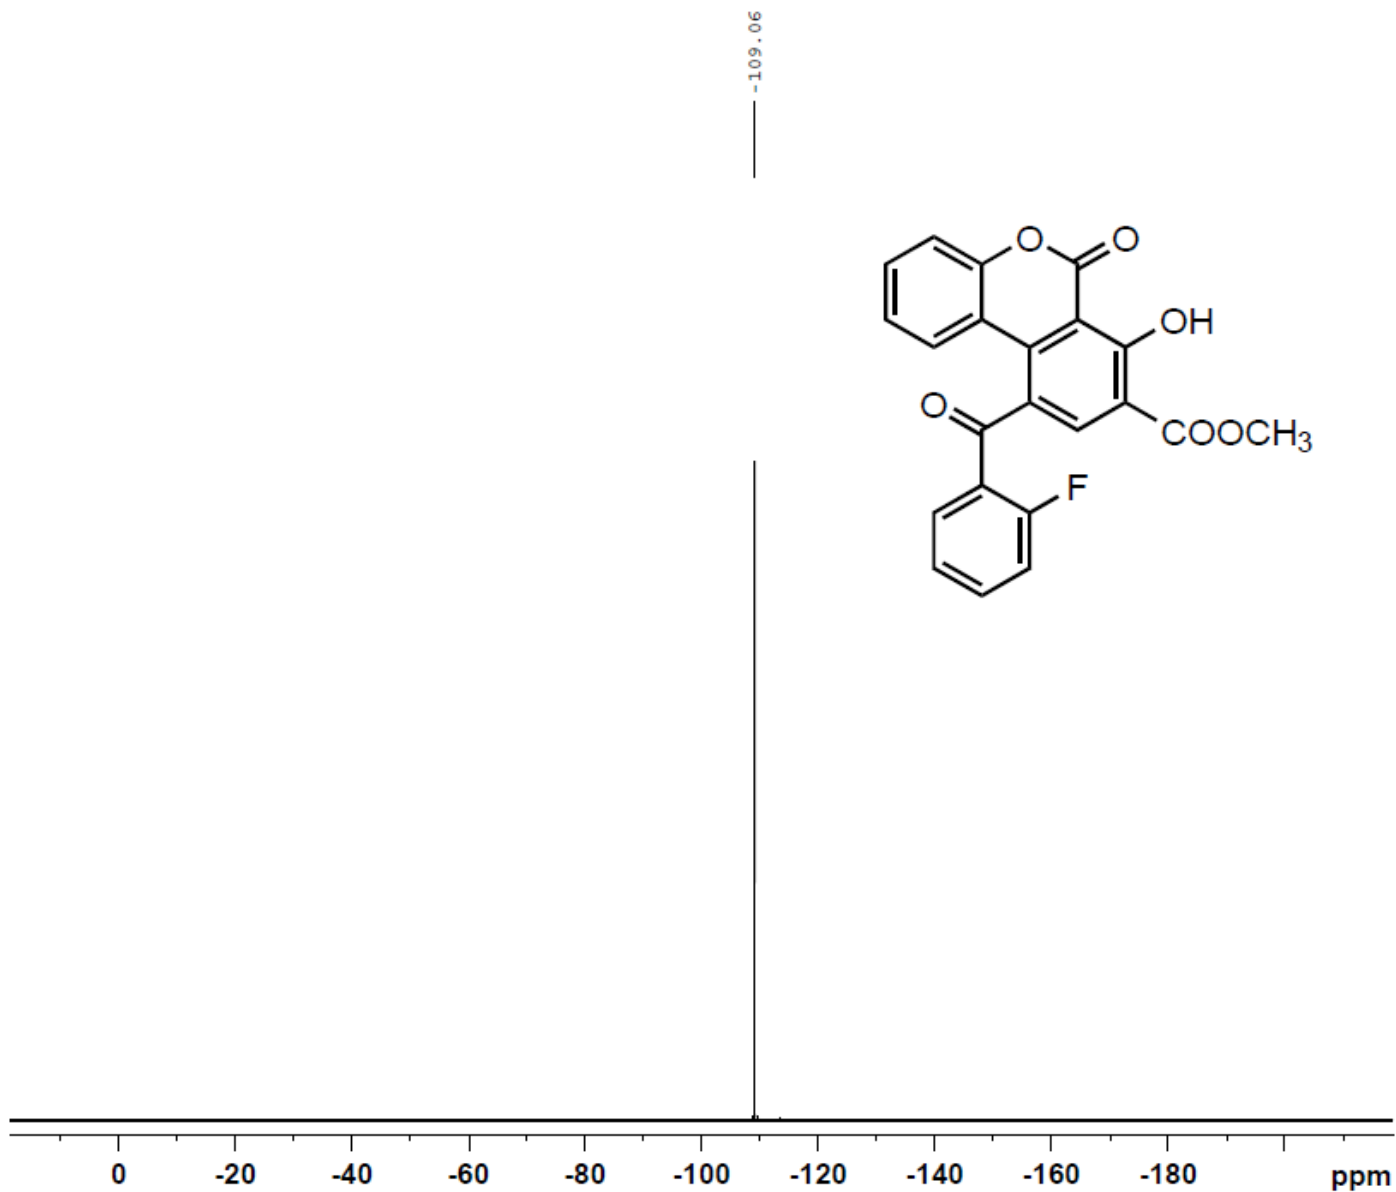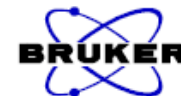

Current Data Parameters  
NAME 110825.u307  
EXPNO 11  
PROCNO 1

F2 - Acquisition Parameters  
Date\_ 20110825  
Time 14.49  
INSTRUM spect  
PROBHD 5 mm PABBO BB-  
PULPROG zgfhigqn  
TD 131072  
SOLVENT CDC13  
NS 8  
DS 4  
SWH 66964.289 Hz  
FIDRES 0.510897 Hz  
AQ 0.9787210 sec  
RG 2050  
DW 7.467 usec  
DE 10.00 usec  
TE 298.4 K  
D1 1.00000000 sec  
D11 0.03000000 sec  
D12 0.00002000 sec  
TD0 1

===== CHANNEL f1 =====  
NUC1 19F  
P1 10.00 usec  
PL1 -3.00 dB  
PL1W 15.53680420 W  
SFO1 282.3761148 MHz

===== CHANNEL f2 =====  
CPDPRG2 waltz16  
NUC2 1H  
PCPD2 72.00 usec  
PL2 0.00 dB  
PL12 17.00 dB  
PL2W 11.25325108 W  
PL12W 0.22453187 W  
SFO2 300.1312005 MHz

F2 - Processing parameters  
SI 65536  
SF 282.4043550 MHz  
WDW EM  
SSB 0  
LB 0.30 Hz  
GB 0  
PC 1.00

Savych, IS-132, DMSO, 1H

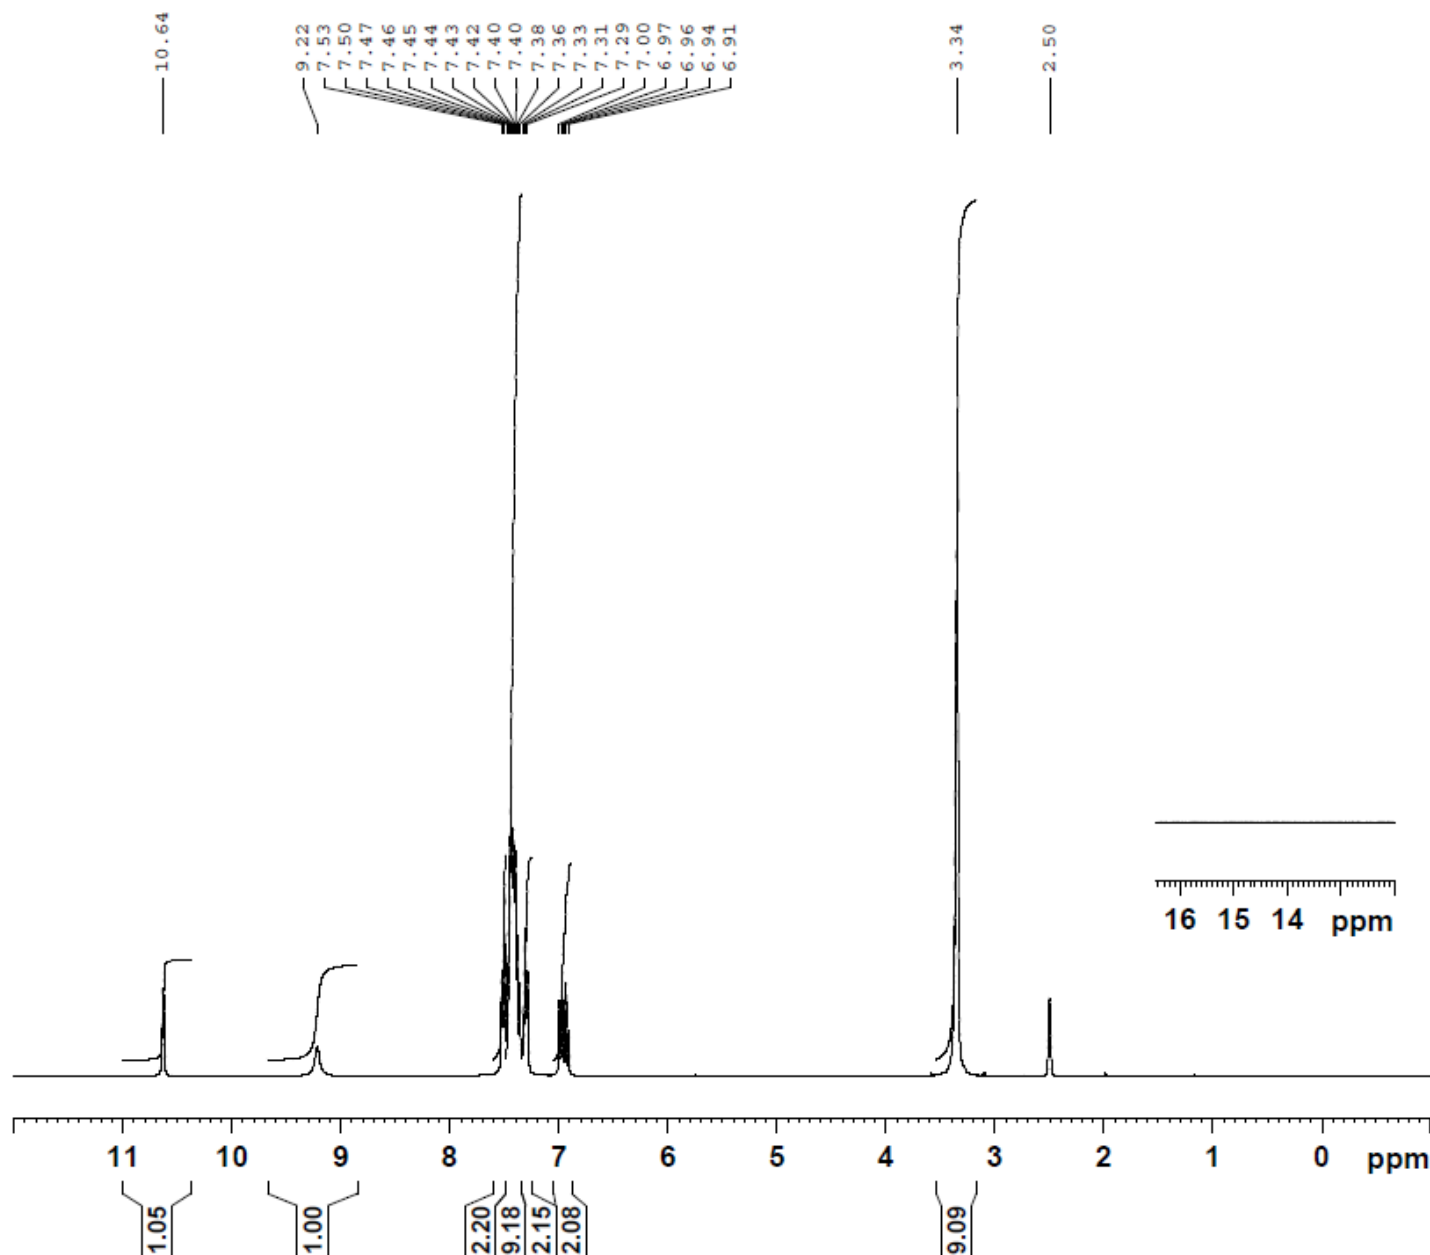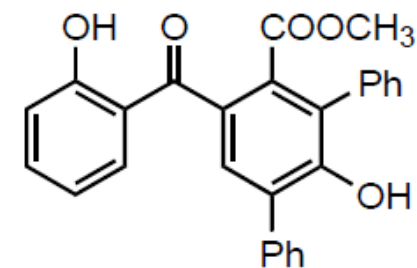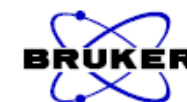

Current Data Parameters  
 NAME 110627.u312 IS-132  
 EXPNO 10  
 PROCNO 1

F2 - Acquisition Parameters  
 Date\_ 20110627  
 Time 11.33  
 INSTRUM spect  
 PROBHD 5 mm PABBO BB-  
 PULPROG zg30  
 TD 65536  
 SOLVENT DMSO  
 NS 16  
 DS 2  
 SWH 6188.119 Hz  
 FIDRES 0.094423 Hz  
 AQ 5.2953587 sec  
 RG 101  
 DW 80.800 usec  
 DE 10.00 usec  
 TE 298.2 K  
 D1 1.00000000 sec  
 TD0 1

===== CHANNEL f1 =====  
 NUC1 1H  
 P1 10.00 usec  
 PL1 0.00 dB  
 PL1W 11.25325108 W  
 SFO1 300.1318534 MHz

F2 - Processing parameters  
 SI 32768  
 SF 300.1300079 MHz  
 WDW EM  
 SSB 0  
 LB 0.30 Hz  
 GB 0  
 PC 1.00

Savych, IS-132, DMSO, 13C

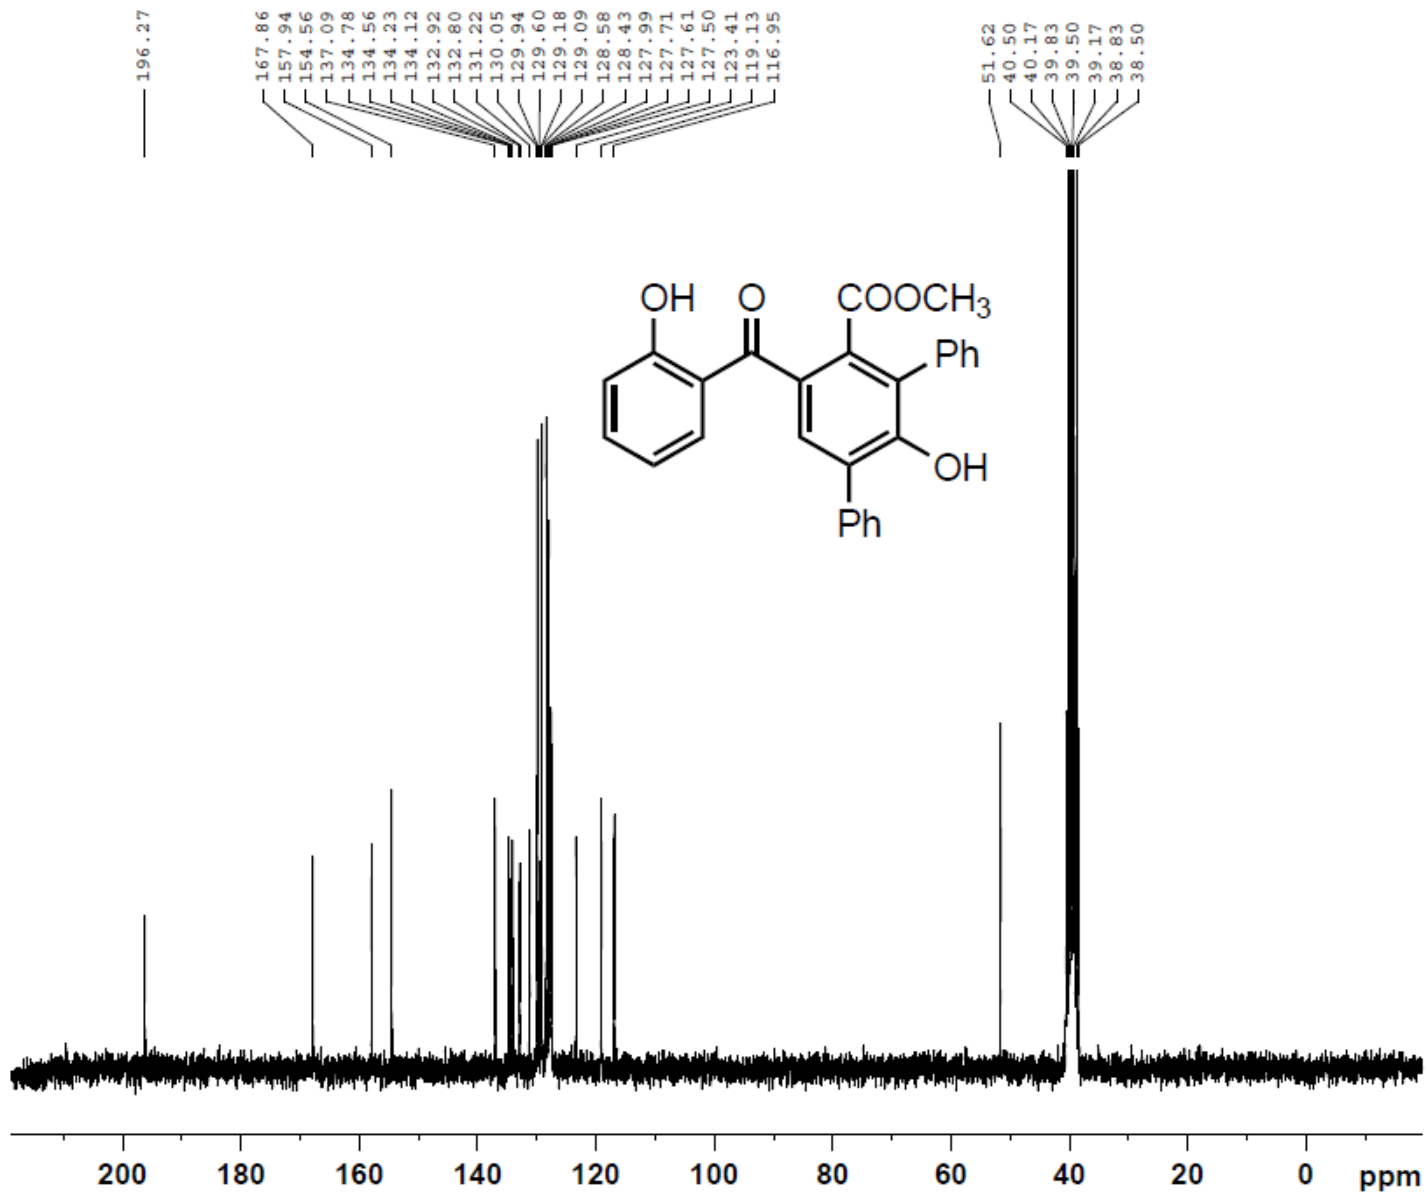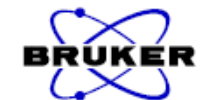

Current Data Parameters  
NAME 110629.208 IS-132  
EXPNO 10  
PROCNO 1

F2 - Acquisition Parameters  
Date\_ 20110629  
Time 13.31  
INSTRUM spect  
PROBHD 5 mm PABBO BB-  
PULPROG zgpg30  
TD 65536  
SOLVENT DMSO  
NS 1024  
DS 4  
SWH 15000.000 Hz  
FIDRES 0.228882 Hz  
AQ 2.1845834 sec  
RG 2050  
DW 33.333 usec  
DE 10.00 usec  
TE 300.6 K  
D1 2.00000000 sec  
d11 0.03000000 sec  
DELTA 1.89999998 sec  
TD0 1

===== CHANNEL f1 =====  
NUC1 13C  
P1 10.00 usec  
PL1 -1.00 dB  
SFO1 62.9015280 MHz

===== CHANNEL f2 =====  
CPDPRG2 waltz16  
NUC2 1H  
PCPD2 70.00 usec  
PL12 15.00 dB  
PL13 15.00 dB  
PL2 -2.50 dB  
SFO2 250.1310005 MHz

F2 - Processing parameters  
SI 32768  
SF 62.8952692 MHz  
WDW EM  
SSB 0  
LB 1.00 Hz  
GB 0  
PC 1.40

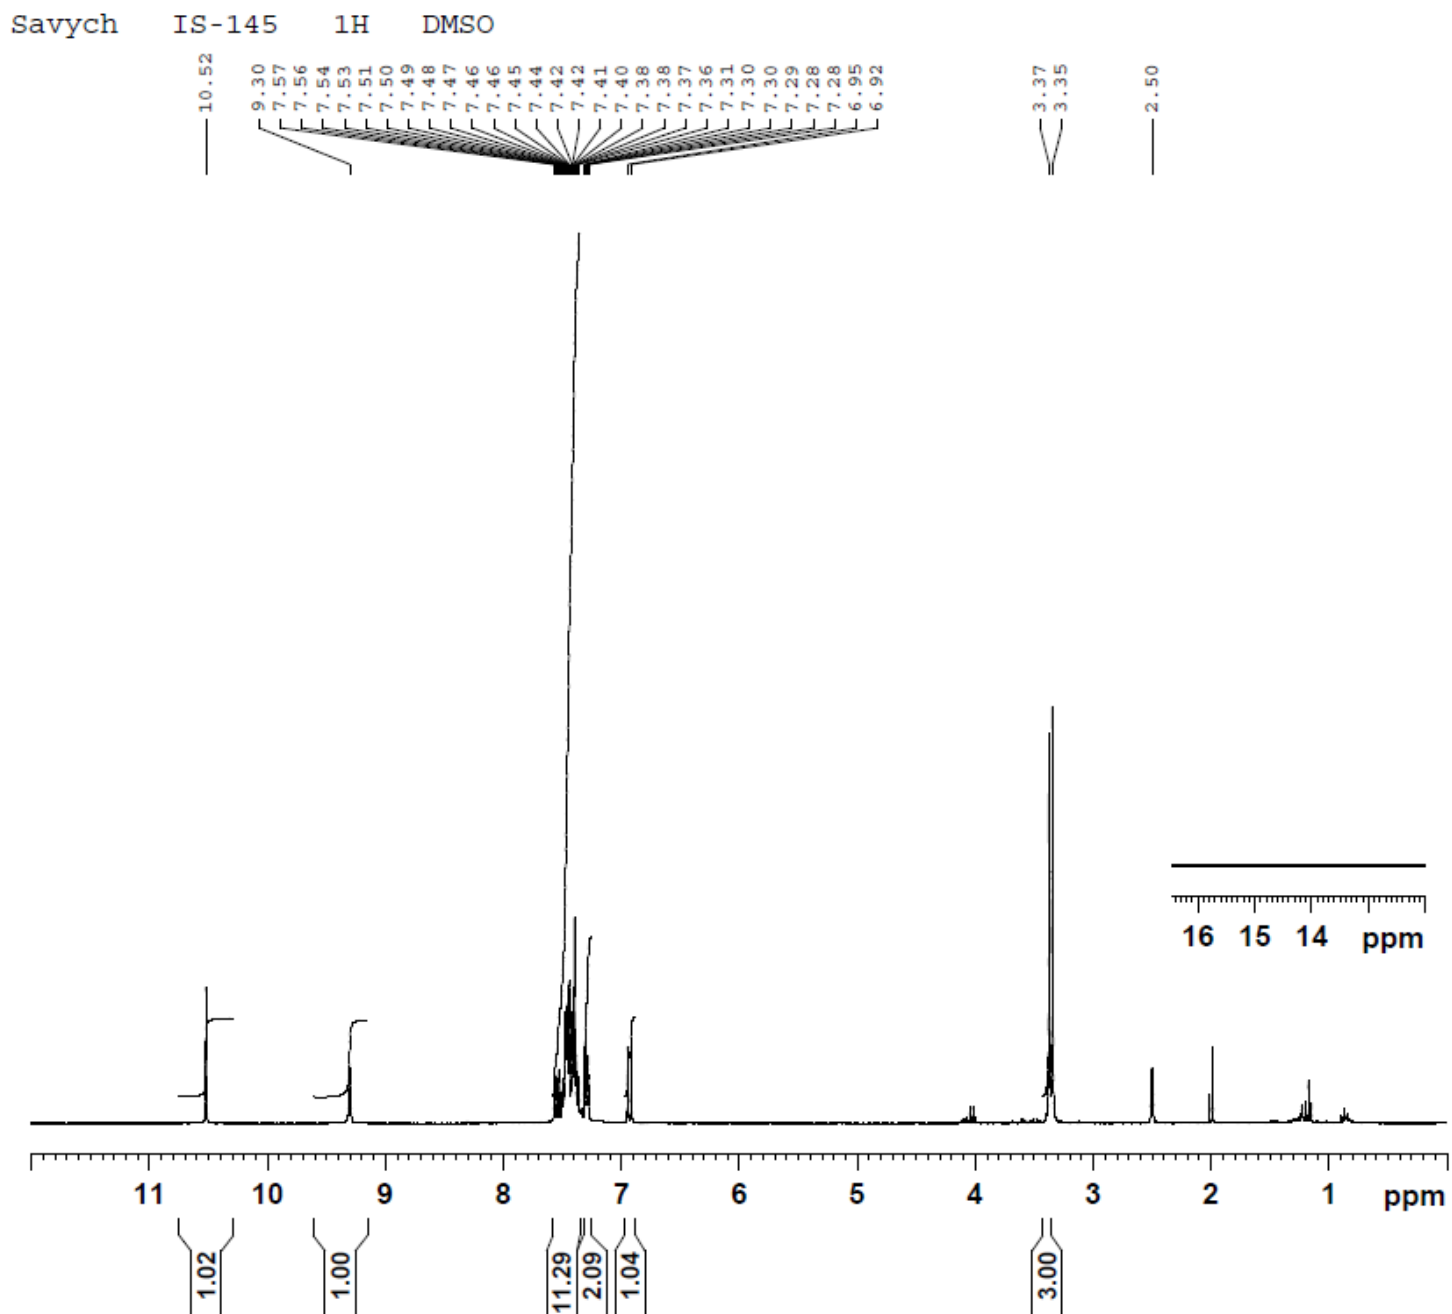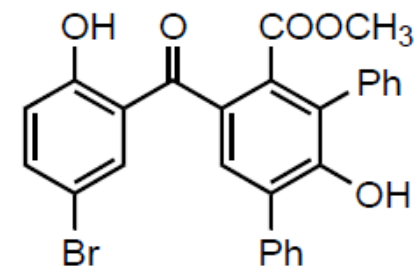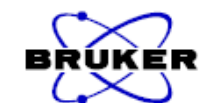

Current Data Parameters  
 NAME 110801.u322 IS-145  
 EXPNO 10  
 PROCNO 1

F2 - Acquisition Parameters  
 Date\_ 20110801  
 Time 13.50  
 INSTRUM spect  
 PROBHD 5 mm PABBO BB-  
 PULPROG zg30  
 TD 65536  
 SOLVENT DMSO  
 NS 16  
 DS 2  
 SWH 6188.119 Hz  
 FIDRES 0.094423 Hz  
 AQ 5.2953587 sec  
 RG 114  
 DW 80.800 usec  
 DE 10.00 usec  
 TE 298.2 K  
 D1 1.00000000 sec  
 TD0 1

===== CHANNEL f1 =====  
 NUC1 1H  
 P1 10.00 usec  
 PL1 0.00 dB  
 PL1W 11.25325108 W  
 SFO1 300.1318534 MHz

F2 - Processing parameters  
 SI 32768  
 SF 300.1300079 MHz  
 WDW EM  
 SSB 0  
 LB 0.30 Hz  
 GB 0  
 PC 1.00



Savych IS-145 13C DMSO

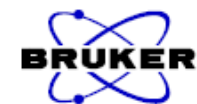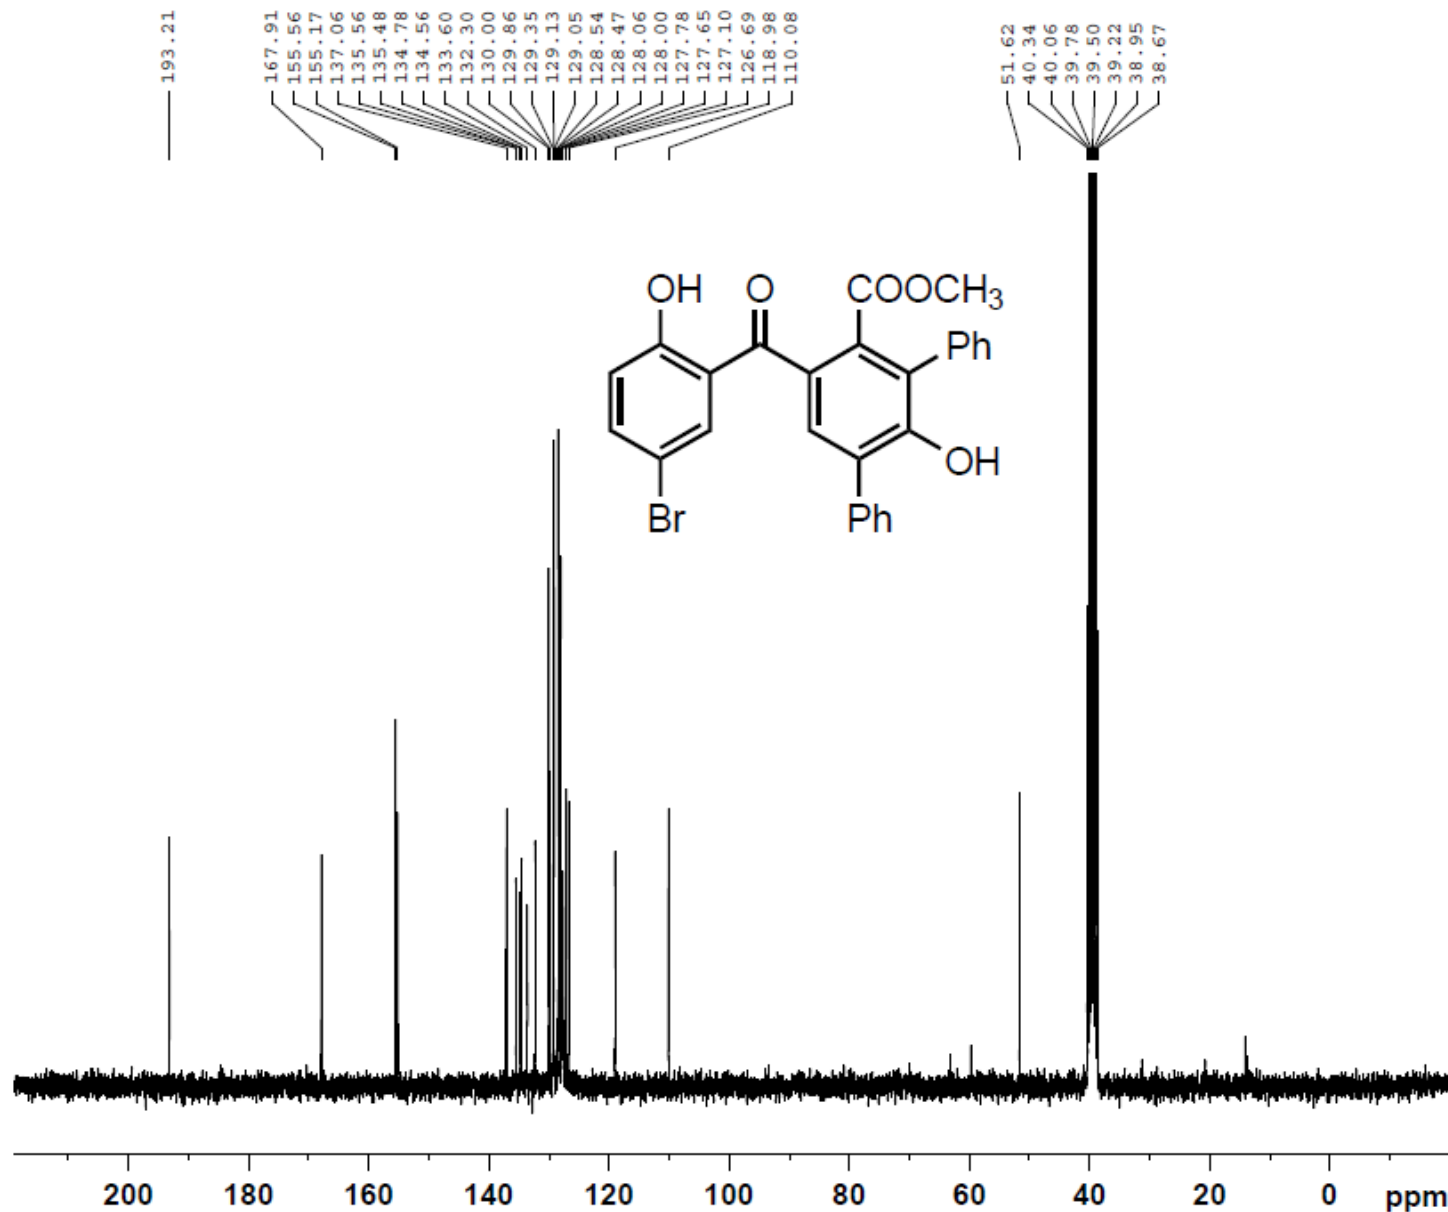

Current Data Parameters  
 NAME 110801.u322 IS-145  
 EXPNO 11  
 PROCNO 1

F2 - Acquisition Parameters  
 Date\_ 20110802  
 Time 3.02  
 INSTRUM spect  
 PROBHD 5 mm PABBO BB-  
 PULPROG zgpg30  
 TD 65536  
 SOLVENT DMSO  
 NS 1024  
 DS 4  
 SWH 18028.846 Hz  
 FIDRES 0.275098 Hz  
 AQ 1.8175818 sec  
 RG 2050  
 DW 27.733 usec  
 DE 10.00 usec  
 TE 298.2 K  
 D1 2.00000000 sec  
 D11 0.03000000 sec  
 TD0 1

===== CHANNEL f1 =====  
 NUC1 13C  
 P1 10.00 usec  
 PL1 -0.50 dB  
 PL1W 33.25691986 W  
 SF01 75.4752953 MHz

===== CHANNEL f2 =====  
 CPDPRG2 waltz16  
 NUC2 1H  
 PCPD2 72.00 usec  
 PL2 0.00 dB  
 PL12 17.00 dB  
 PL13 17.00 dB  
 PL2W 11.25325108 W  
 PL12W 0.22453187 W  
 PL13W 0.22453187 W  
 SFO2 300.1312005 MHz

F2 - Processing parameters  
 SI 32768  
 SF 75.4677870 MHz  
 WDW EM  
 SSB 0  
 LB 1.00 Hz  
 GB 0  
 PC 1.40

Savych IS-202.1 1H DMSO

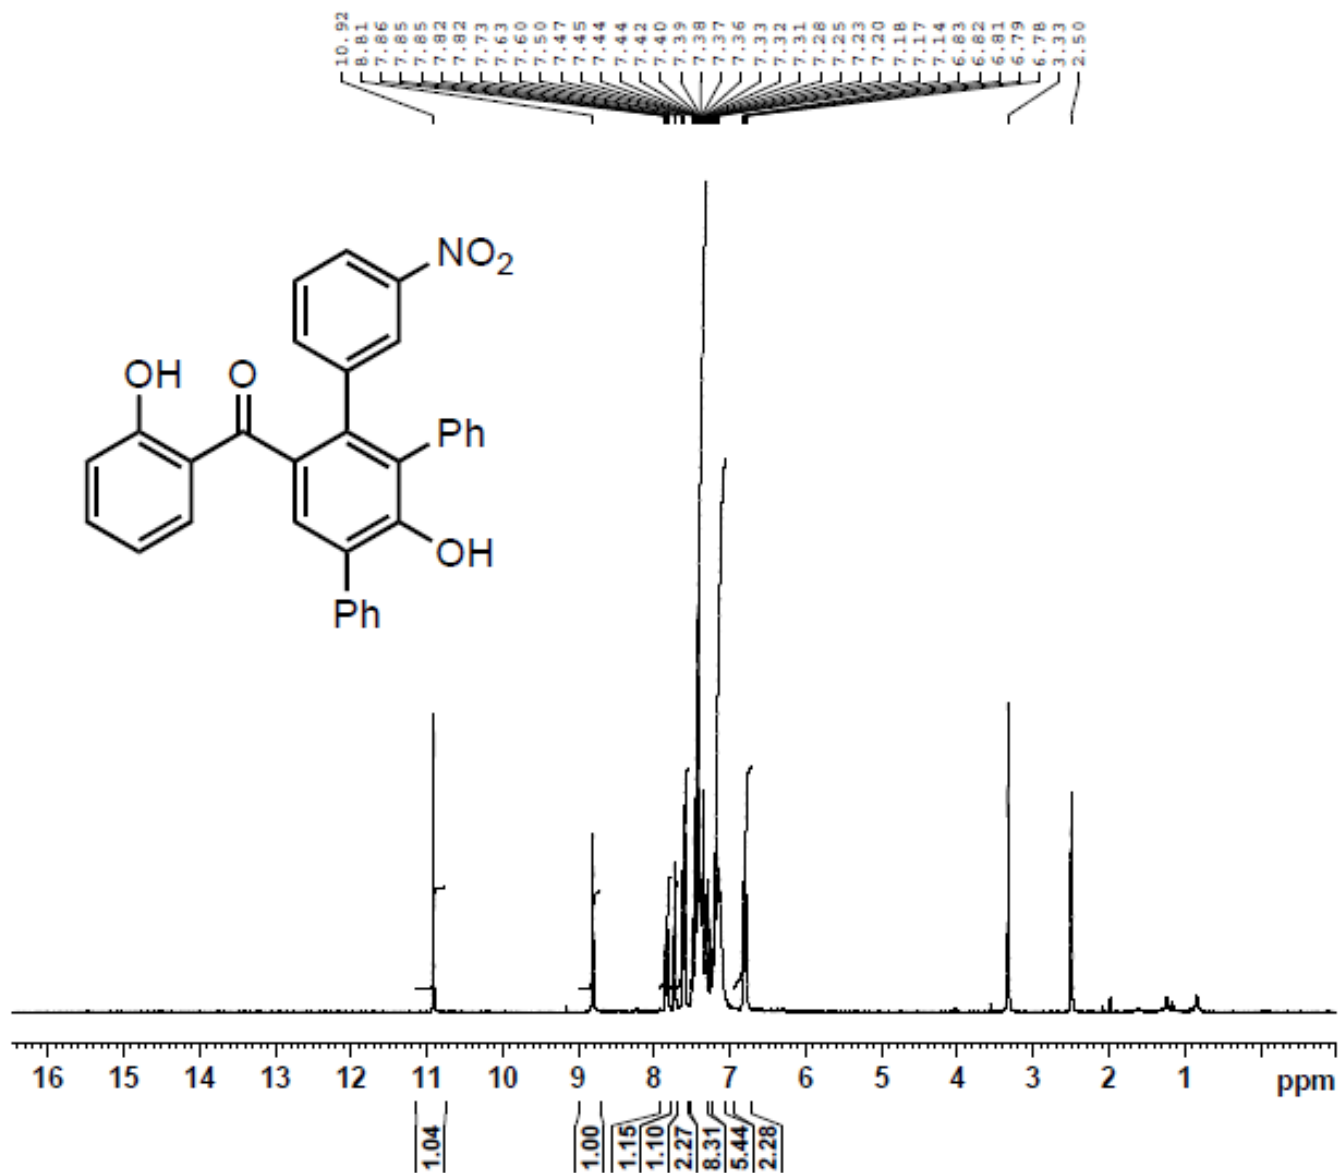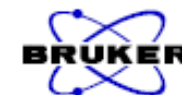

Current Data Parameters  
NAME 120217.202 IS-202.1  
EXPNO 10  
PROCNO 1

F2 - Acquisition Parameters  
Date\_ 20120217  
Time 7.59  
INSTRUM spect  
PROBHD 5 mm QNP 1H/13  
PULPROG zg30  
TD 65536  
SOLVENT DMSO  
NS 16  
DS 2  
SWH 5165.289 Hz  
FIDRES 0.078816 Hz  
AQ 6.3439350 sec  
RG 645  
DW 96.800 usec  
DE 10.00 usec  
TE 298.2 K  
D1 1.00000000 sec  
TD0 1

==== CHANNEL f1 =====  
NUC1 1H  
P1 11.40 usec  
PL1 -3.00 dB  
SFO1 250.1315447 MHz

F2 - Processing parameters  
SI 32768  
SF 250.1299951 MHz  
WDW EM  
SSB 0  
LB 0.30 Hz  
GB 0  
PC 1.00

Savych IS-202.1 13C DMSO

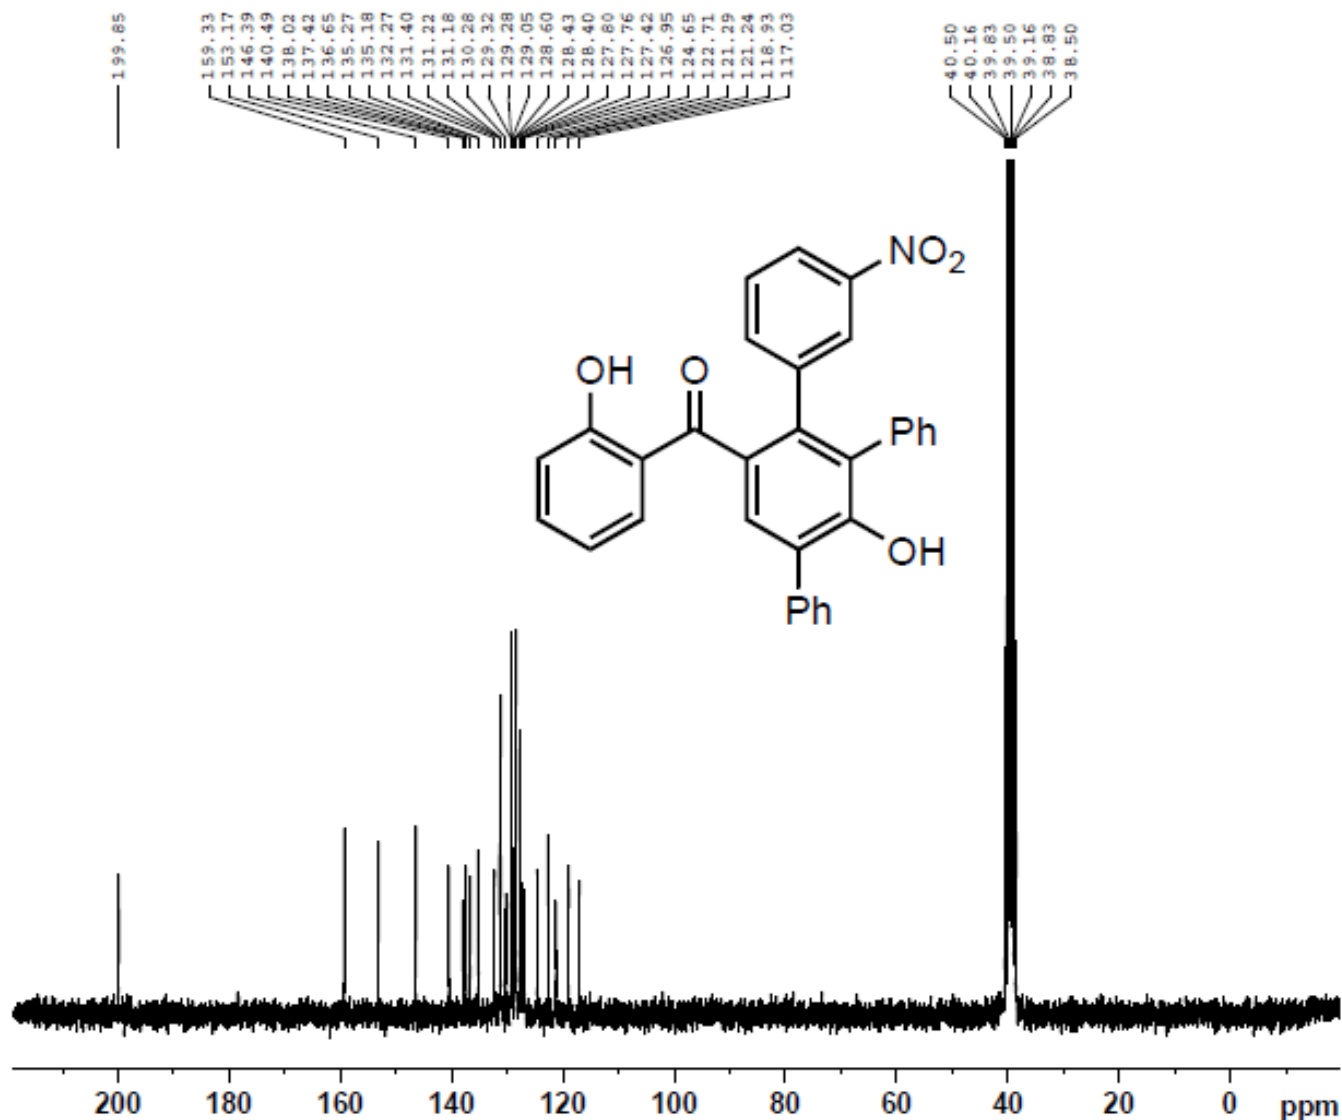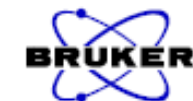

Current Data Parameters  
NAME 120217.202 IS-202.1  
EXPNO 11  
PROCNO 1

F2 - Acquisition Parameters  
Date\_ 20120217  
Time 9.28  
INSTRUM spect  
PROBHD 5 mm QNP 1H/13  
PULPROG zgpg30  
TD 65536  
SOLVENT DMSO  
NS 1024  
DS 4  
SWH 15000.000 Hz  
FIDRES 0.228882 Hz  
AQ 2.1845834 sec  
RG 2050  
DW 33.333 usec  
DE 10.00 usec  
TE 298.1 K  
D1 2.0000000 sec  
d11 0.0300000 sec  
DELTA 1.89999998 sec  
TD0 1

===== CHANNEL f1 =====  
NUC1 13C  
P1 10.20 usec  
PL1 0.00 dB  
SFO1 62.9015280 MHz

===== CHANNEL f2 =====  
CPDPRG2 waltz16  
NUC2 1H  
PCPD2 70.00 usec  
PL12 14.00 dB  
PL13 14.00 dB  
PL2 -3.00 dB  
SFO2 250.1310005 MHz

F2 - Processing parameters  
SI 32768  
SF 62.8952683 MHz  
WDW EM  
SSB 0  
LB 1.00 Hz  
GB 0  
PC 1.40

Savych IS-209 1H DMSO

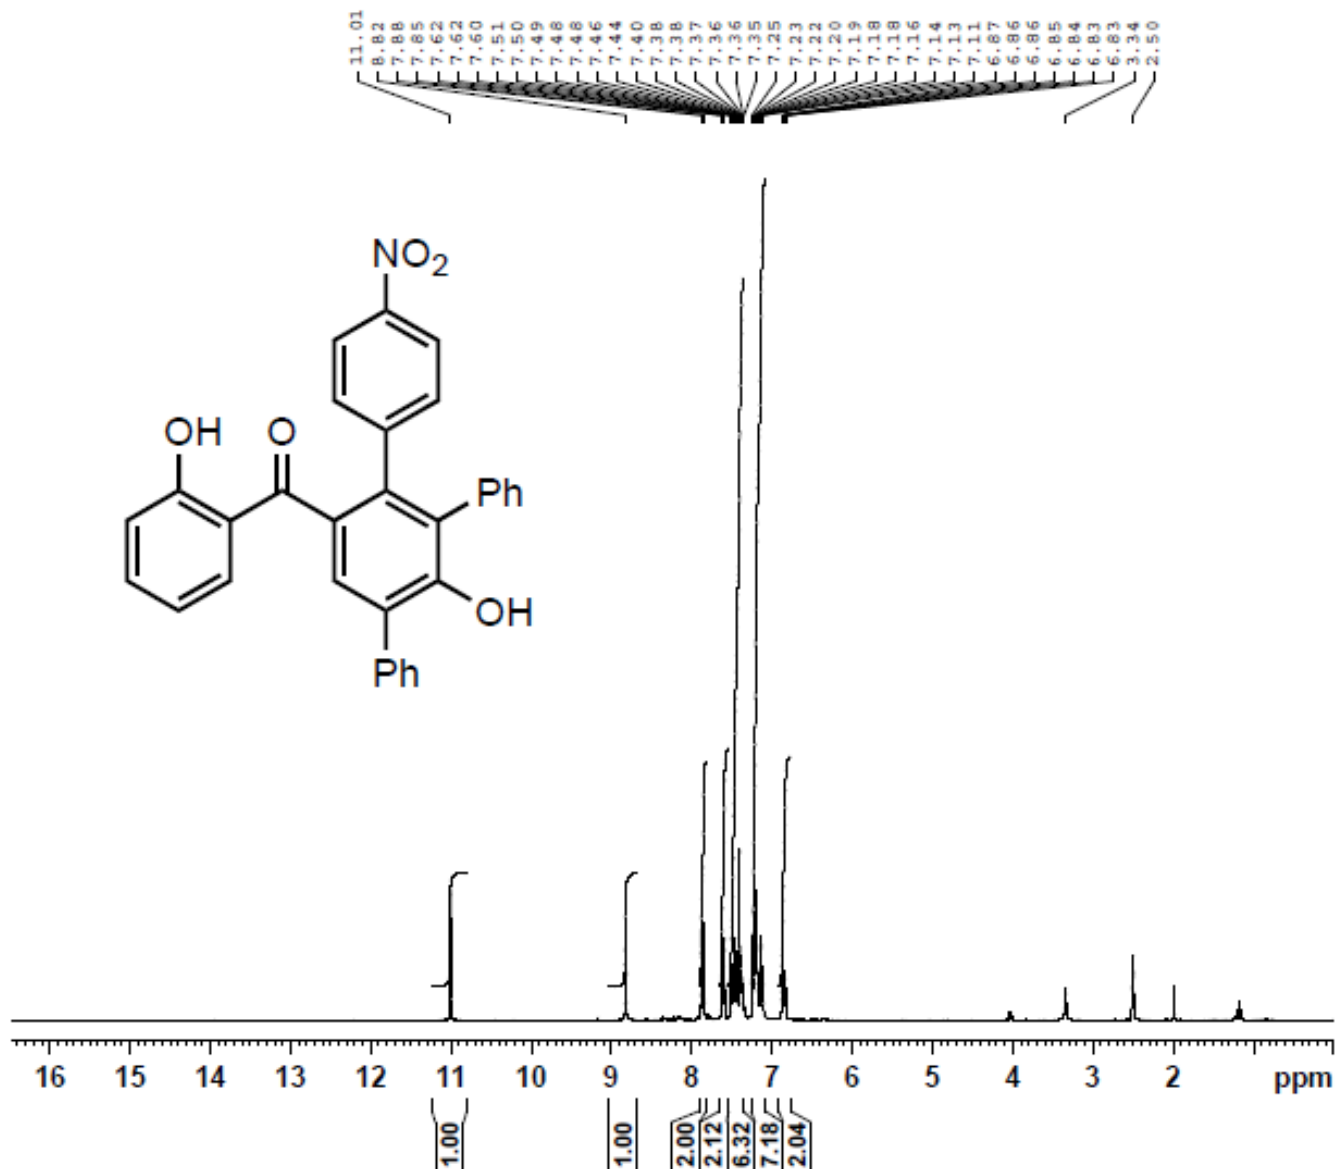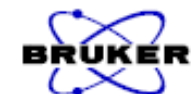

Current Data Parameters  
 NAME 120202.u335 IS-209  
 EXPNO 10  
 PROCNO 1

F2 - Acquisition Parameters  
 Date\_ 20120202  
 Time 15.42  
 INSTRUM spect  
 PROBHD 5 mm PABBO BB-  
 PULPROG zg30  
 TD 65536  
 SOLVENT DMSO  
 NS 16  
 DS 2  
 SWH 6188.119 Hz  
 FIDRES 0.094423 Hz  
 AQ 5.2953587 sec  
 RG 101  
 DW 80.800 usec  
 DE 10.00 usec  
 TE 298.2 K  
 D1 1.00000000 sec  
 TD0 1

===== CHANNEL f1 =====  
 NUC1 1H  
 P1 10.00 usec  
 PL1 0.00 dB  
 PL1W 11.25325108 W  
 SFO1 300.1318534 MHz

F2 - Processing parameters  
 SI 32768  
 SF 300.130062 MHz  
 WDW EM  
 SSB 0  
 LB 0.30 Hz  
 GB 0  
 PC 1.00

Savych IS-209 13C DMSO

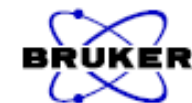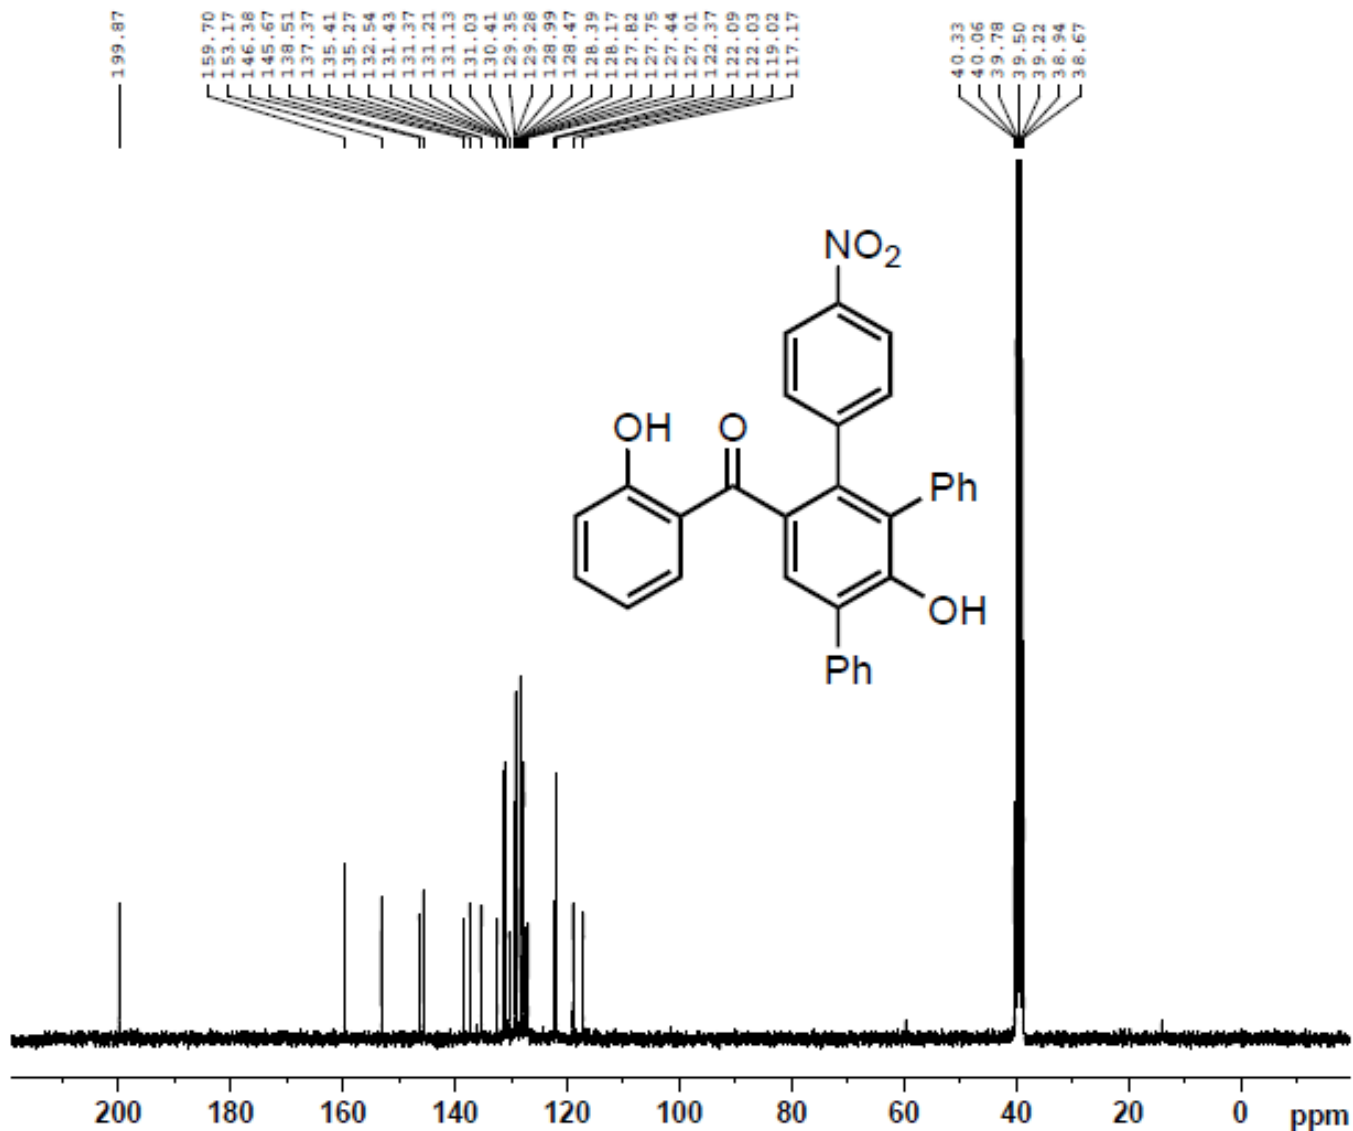

Current Data Parameters  
NAME 120202.u335 IS-209  
EXPNO 11  
PROCNO 1

F2 - Acquisition Parameters  
Date\_ 20120202  
Time 16.50  
INSTRUM spect  
PROBHD 5 mm PABBO BB-  
PULPROG zgpg30  
TD 65536  
SOLVENT DMSO  
NS 1024  
DS 4  
SWH 18028.846 Hz  
FIDRES 0.275098 Hz  
AQ 1.8175818 sec  
RG 2050  
DW 27.733 usec  
DE 10.00 usec  
TE 298.2 K  
D1 2.00000000 sec  
D11 0.03000000 sec  
TD0 1

==== CHANNEL f1 =====  
NUC1 13C  
P1 10.00 usec  
PL1 -0.50 dB  
PL1W 33.25691986 W  
SFO1 75.4752953 MHz

==== CHANNEL f2 =====  
CPDPRG2 waltz16  
NUC2 1H  
PCPD2 72.00 usec  
PL2 0.00 dB  
PL12 17.00 dB  
PL13 17.00 dB  
PL2W 11.25325108 W  
PL12W 0.22453187 W  
PL13W 0.22453187 W  
SFO2 300.1312005 MHz

F2 - Processing parameters  
SI 32768  
SF 75.4677876 MHz  
WDW EM  
SSB 0  
LB 1.00 Hz  
GB 0  
PC 1.40

Savych IS-220 1H DMSO

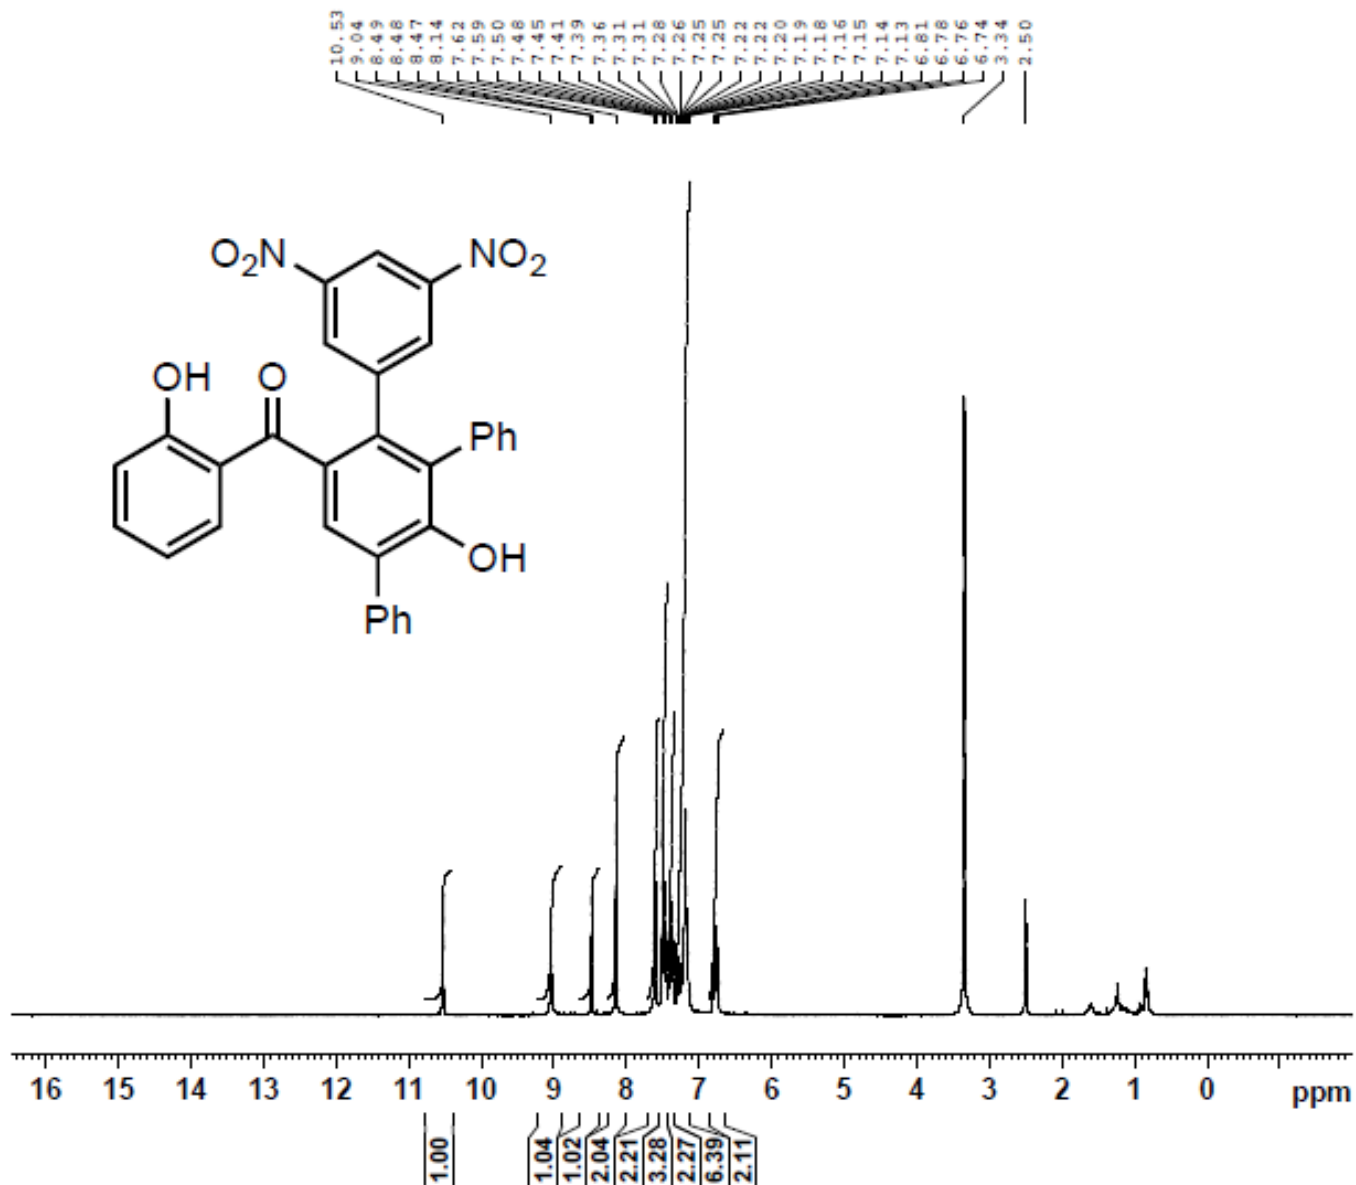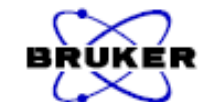

Current Data Parameters  
 NAME 120223.u312 IS-220  
 EXPNO 10  
 PROCNO 1

F2 - Acquisition Parameters  
 Date\_ 20120223  
 Time 11.56  
 INSTRUM spect  
 PROBHD 5 mm PABBO BB-  
 PULPROG zg30  
 TD 65536  
 SOLVENT DMSO  
 NS 16  
 DS 2  
 SWH 6188.119 Hz  
 FIDRES 0.094423 Hz  
 AQ 5.2953587 sec  
 RG 50.8  
 DW 80.800 usec  
 DE 10.00 usec  
 TE 298.2 K  
 D1 1.00000000 sec  
 TD0 1

===== CHANNEL f1 =====  
 NUC1 1H  
 P1 10.00 usec  
 PL1 0.00 dB  
 PL1W 11.25325108 W  
 SFO1 300.1318534 MHz

F2 - Processing parameters  
 SI 32768  
 SF 300.1300076 MHz  
 WDW EM  
 SSB 0  
 LB 0.30 Hz  
 GB 0  
 PC 1.00

Savych IS-220 13C DMSO

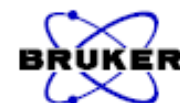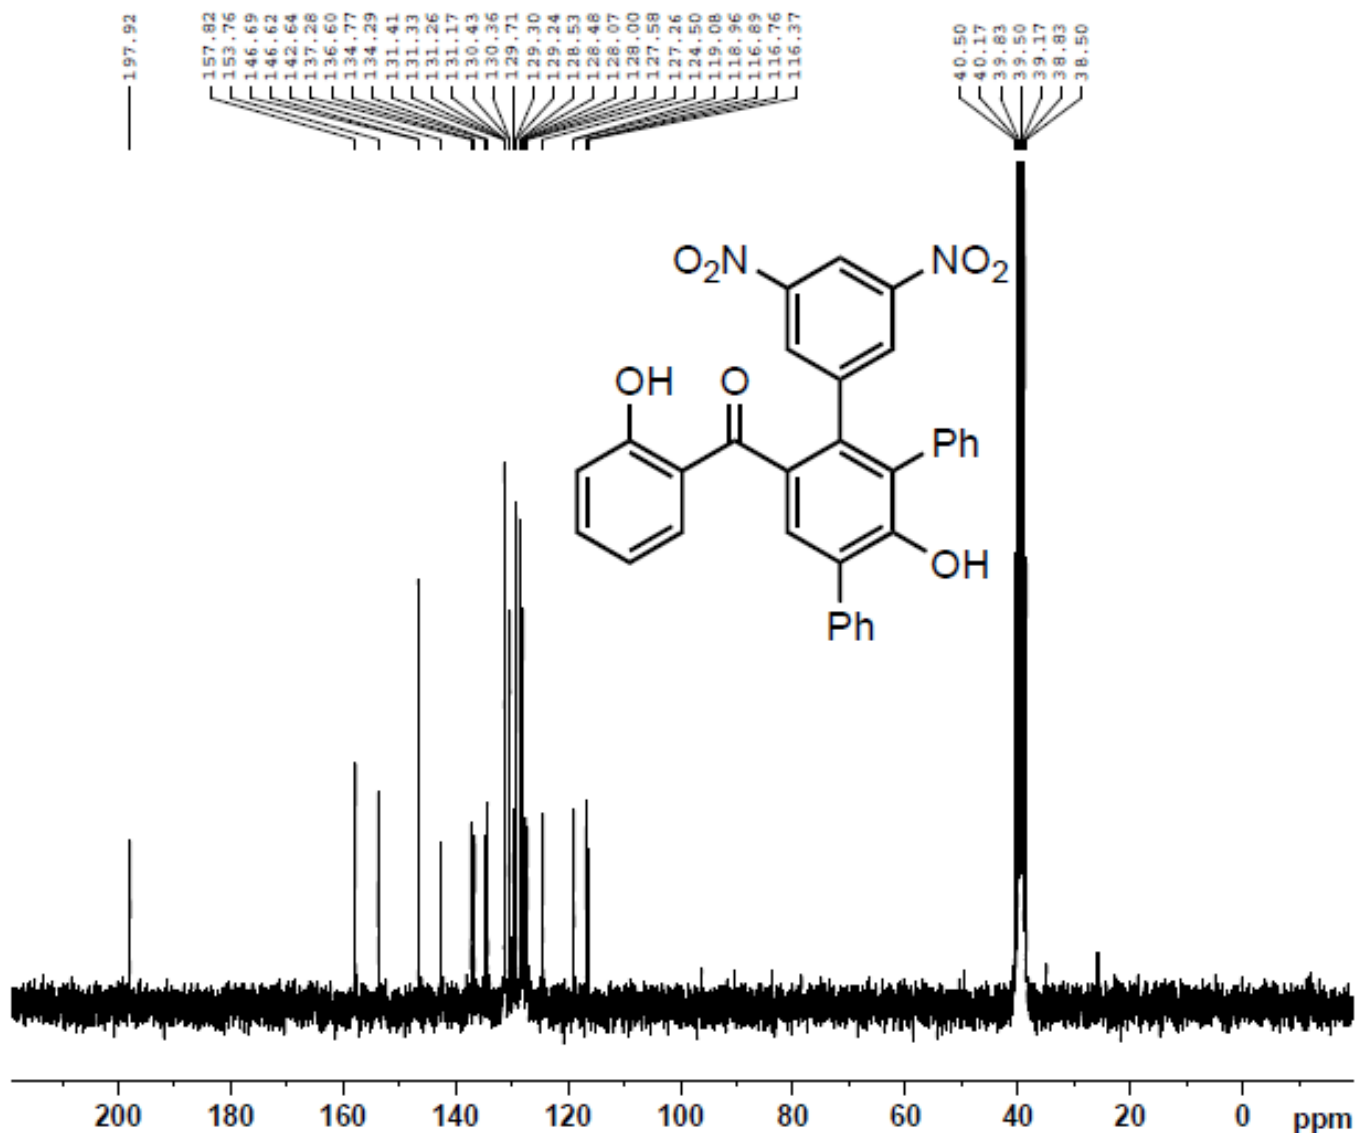

Current Data Parameters  
 NAME 120223.206 IS-220  
 EXPNO 10  
 PROCNO 1

F2 - Acquisition Parameters  
 Date 20120223  
 Time 20.34  
 INSTRUM spect  
 PROBHD 5 mm QNP 1H/13  
 PULPROG zgpg30  
 TD 65536  
 SOLVENT DMSO  
 NS 1024  
 DS 4  
 SWH 15000.000 Hz  
 FIDRES 0.228882 Hz  
 AQ 2.1845834 sec  
 RG 2050  
 DW 33.333 usec  
 DE 10.00 usec  
 TE 298.1 K  
 D1 2.0000000 sec  
 d11 0.0300000 sec  
 DELTA 1.89999998 sec  
 TD0 1

===== CHANNEL f1 =====  
 NUC1 13C  
 P1 10.20 usec  
 PL1 0.00 dB  
 SFO1 62.9015280 MHz

===== CHANNEL f2 =====  
 CPDPRG2 waltz16  
 NUC2 1H  
 PCPD2 70.00 usec  
 PL12 14.00 dB  
 PL13 14.00 dB  
 PL2 -3.00 dB  
 SFO2 250.1310005 MHz

F2 - Processing parameters  
 SI 32768  
 SF 62.8952667 MHz  
 WDW EM  
 SSB 0  
 LB 1.00 Hz  
 GB 0  
 PC 1.40



Savych IS-208.1 1H DMSO

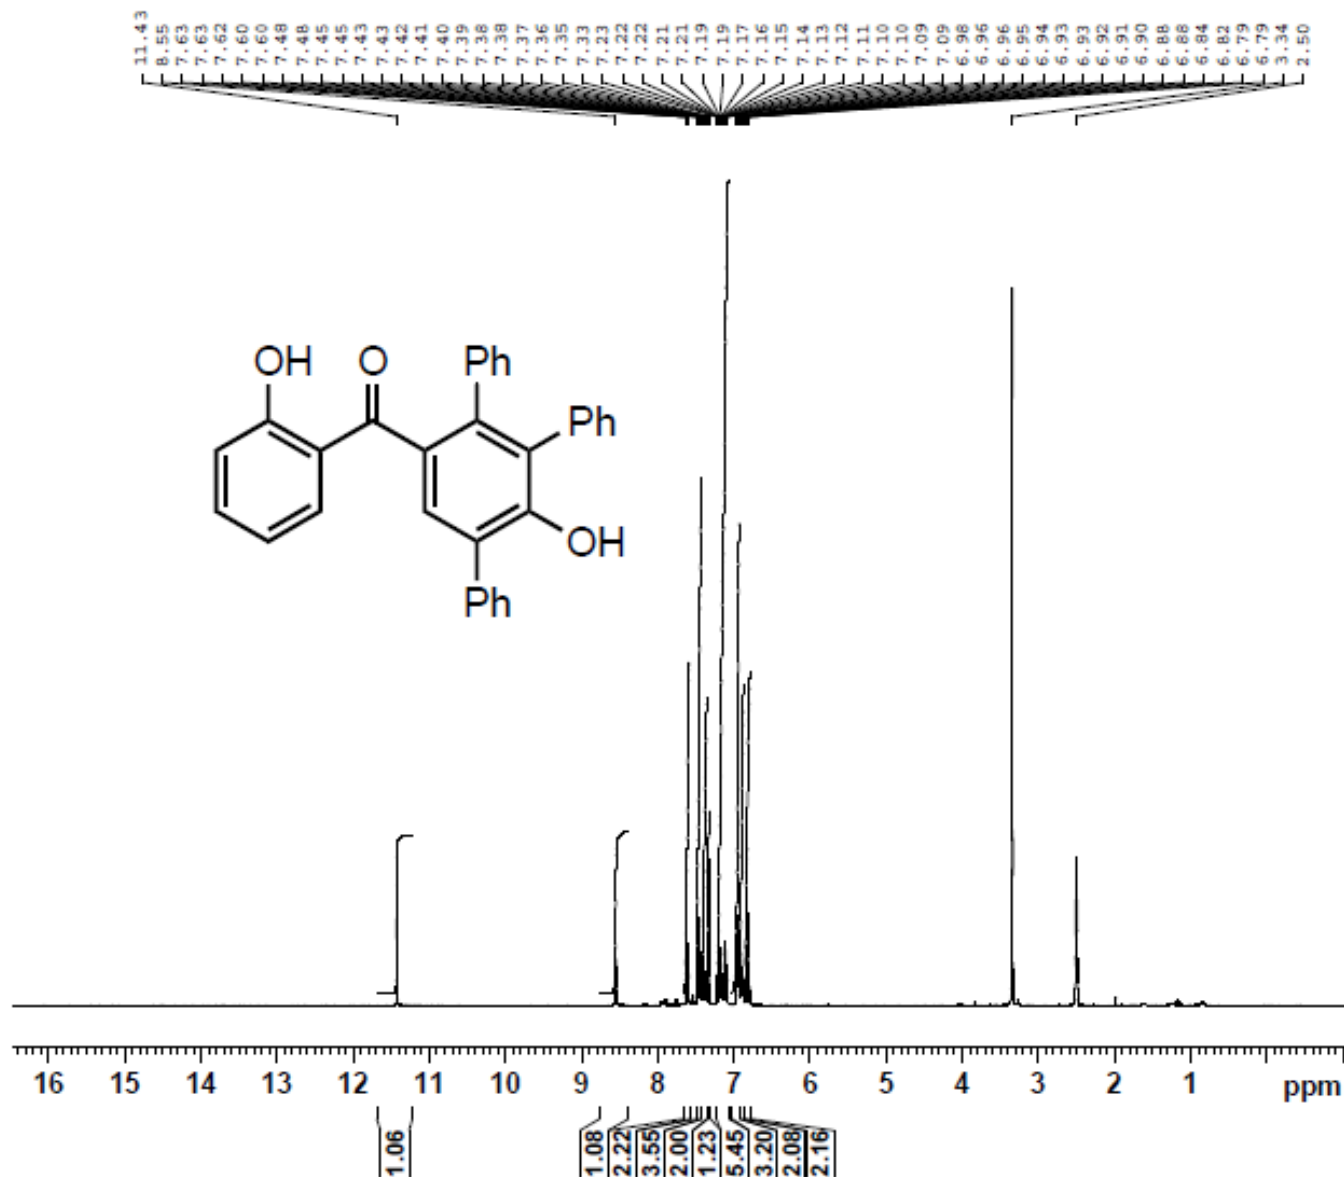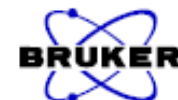

Current Data Parameters  
 NAME 120507.u319 IS-208.1  
 EXPNO 10  
 PROCNO 1

F2 - Acquisition Parameters  
 Date\_ 20120507  
 Time 11.04  
 INSTRUM spect  
 PROBHD 5 mm PABBO BB-  
 PULPROG zg30  
 TD 65536  
 SOLVENT DMSO  
 NS 16  
 DS 2  
 SWH 6188.119 Hz  
 FIDRES 0.094423 Hz  
 AQ 5.2953587 sec  
 RG 90.5  
 DW 80.800 usec  
 DE 10.00 usec  
 TE 298.2 K  
 D1 1.00000000 sec  
 TD0 1

===== CHANNEL f1 =====  
 NUC1 1H  
 P1 10.00 usec  
 PL1 0.00 dB  
 PL1W 11.25325108 W  
 SFO1 300.1318534 MHz

F2 - Processing parameters  
 SI 32768  
 SF 300.1300066 MHz  
 WDW EM  
 SSB 0  
 LB 0.30 Hz  
 GB 0  
 PC 1.00



Savych IS-208.1 13C DMSO

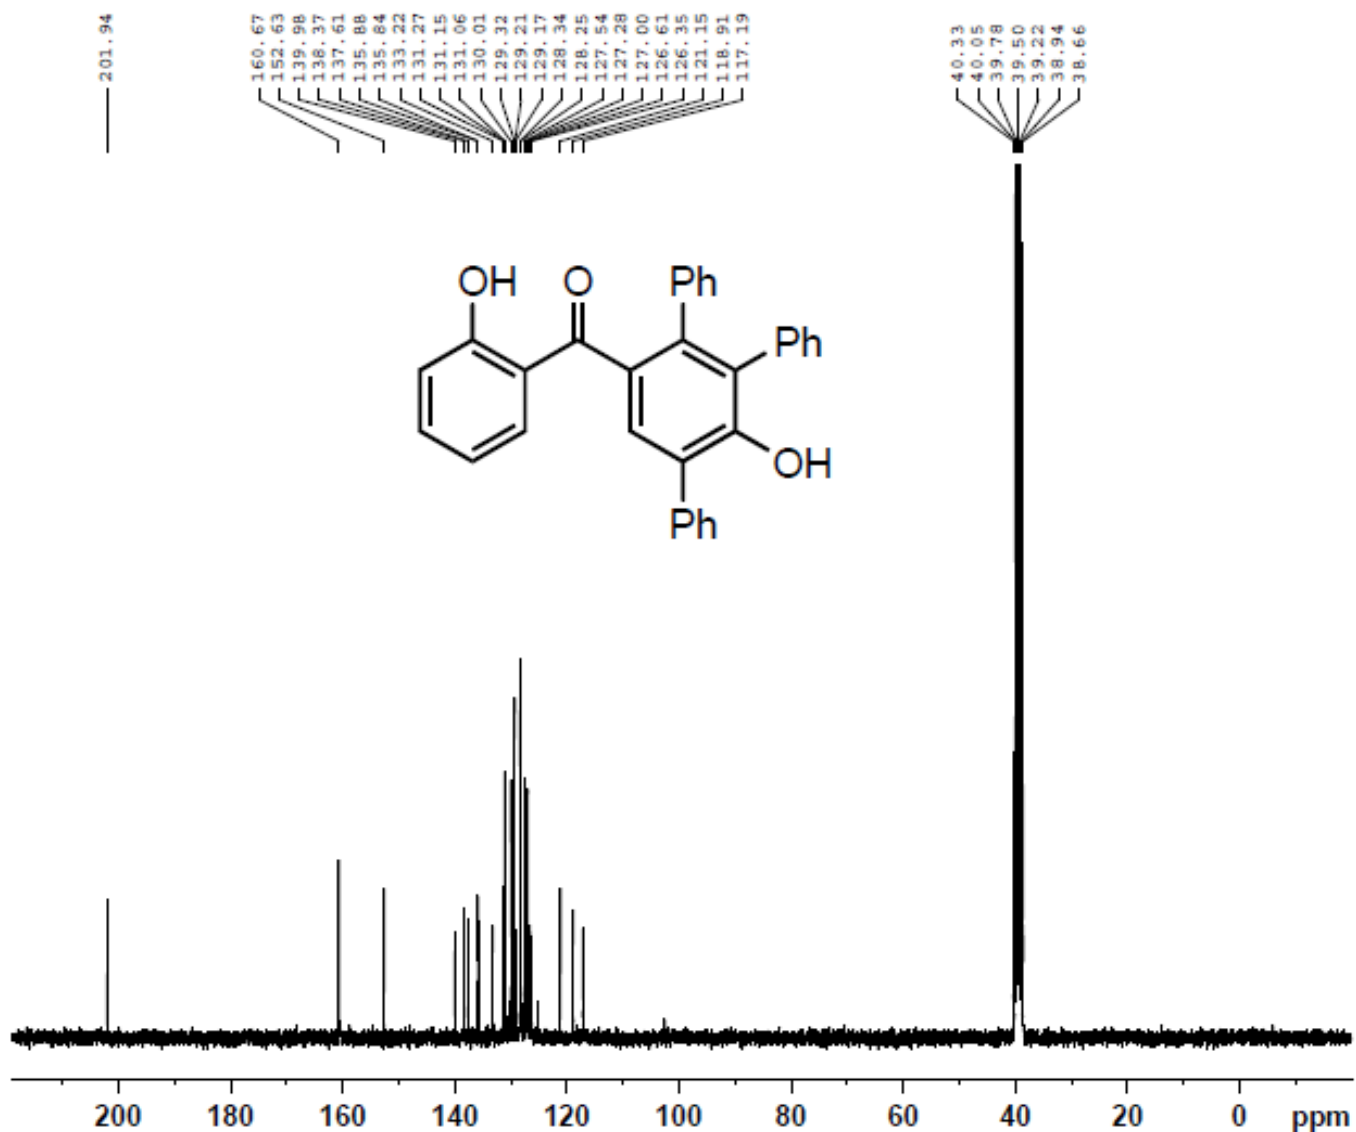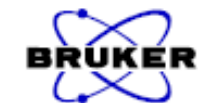

Current Data Parameters  
NAME 120507.u319 IS-208.1  
EXPNO 11  
PROCNO 1

F2 - Acquisition Parameters  
Date\_ 20120507  
Time 22.42  
INSTRUM spect  
PROBHD 5 mm PABBO BB-  
PULPROG zgpg30  
TD 65536  
SOLVENT DMSO  
NS 1024  
DS 4  
SWH 18028.846 Hz  
FIDRES 0.275098 Hz  
AQ 1.8175818 sec  
RG 2050  
DW 27.733 usec  
DE 10.00 usec  
TE 298.4 K  
D1 2.00000000 sec  
D11 0.03000000 sec  
TD0 1

==== CHANNEL f1 =====  
NUC1 13C  
P1 10.00 usec  
PL1 -0.50 dB  
PL1W 33.25691986 W  
SFO1 75.4752953 MHz

==== CHANNEL f2 =====  
CPDPRG2 waltz16  
NUC2 1H  
PCPD2 72.00 usec  
PL2 0.00 dB  
PL12 17.00 dB  
PL13 17.00 dB  
PL2W 11.25325108 W  
PL12W 0.22453187 W  
PL13W 0.22453187 W  
SFO2 300.1312005 MHz

F2 - Processing parameters  
SI 32768  
SF 75.4677870 MHz  
WDW EM  
SSB 0  
LB 1.00 Hz  
GB 0  
PC 1.40

Savych IS-176.1 1H DMSO

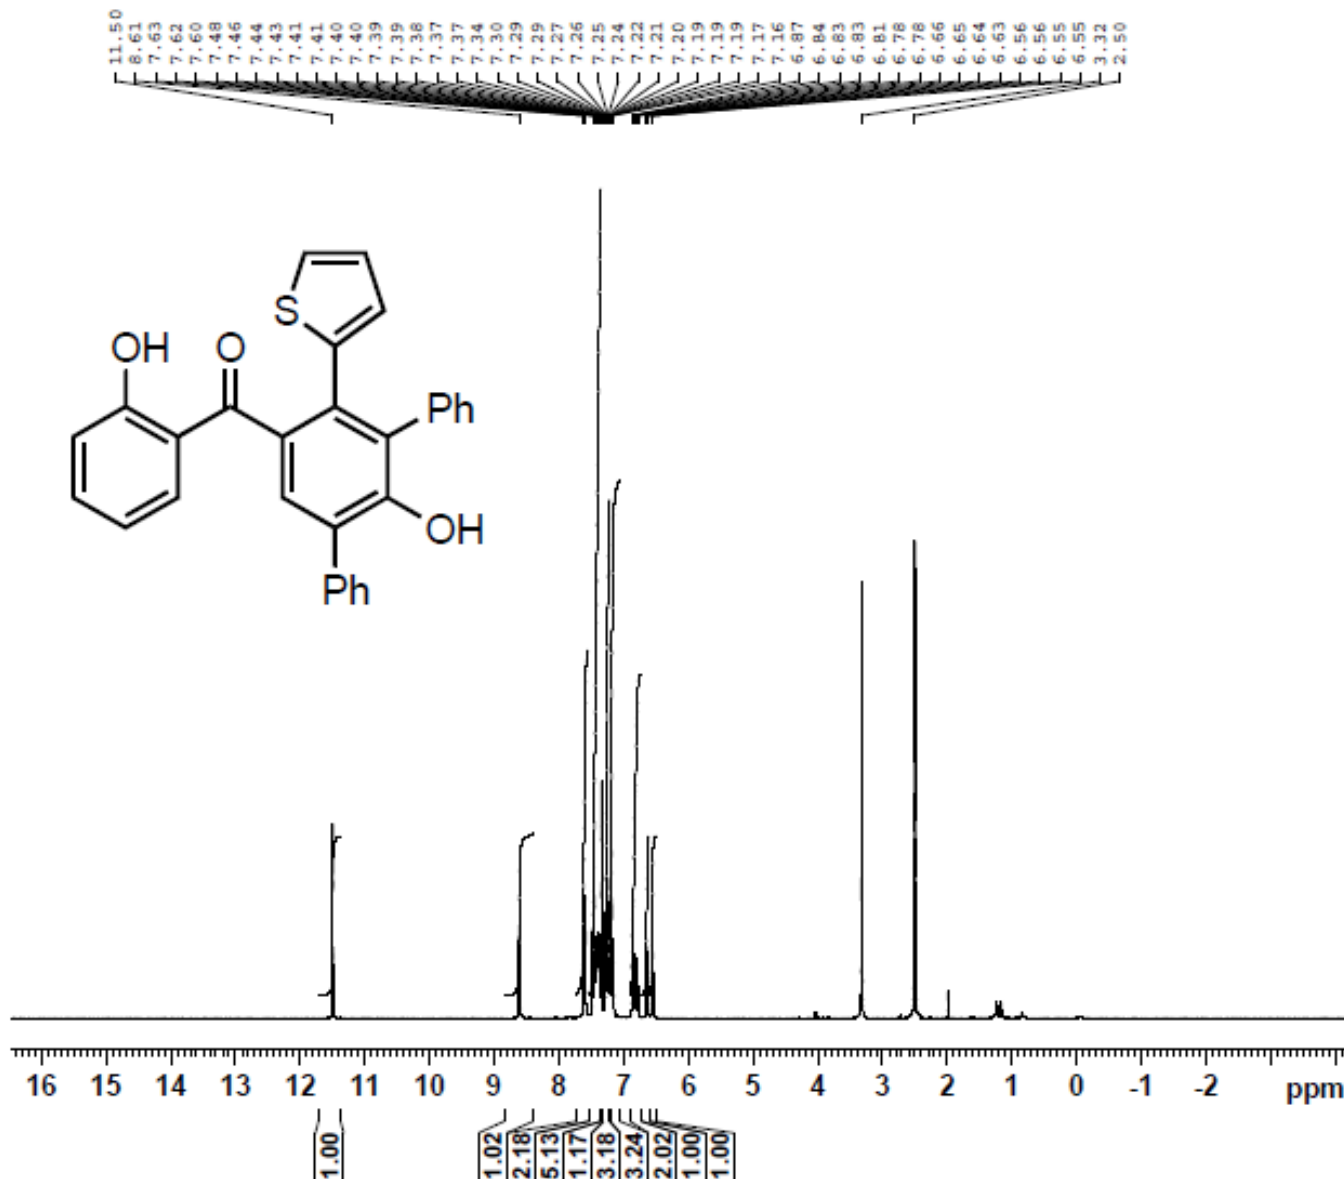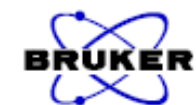

Current Data Parameters  
 NAME 120514.u303 IS-176.1  
 EXPNO 10  
 PROCNO 1

F2 - Acquisition Parameters  
 Date\_ 20120514  
 Time 8.29  
 INSTRUM spect  
 PROBHD 5 mm PABBO BB-  
 PULPROG zg30  
 TD 65536  
 SOLVENT DMSO  
 NS 16  
 DS 2  
 SWH 6188.119 Hz  
 FIDRES 0.094423 Hz  
 AQ 5.2953587 sec  
 RG 181  
 DW 80.800 usec  
 DE 10.00 usec  
 TE 298.2 K  
 D1 1.00000000 sec  
 TD0 1

===== CHANNEL f1 =====  
 NUC1 1H  
 P1 10.00 usec  
 PL1 0.00 dB  
 PL1W 11.25325108 W  
 SFO1 300.1318534 MHz

F2 - Processing parameters  
 SI 32768  
 SF 300.1300075 MHz  
 WDW EM  
 SSB 0  
 LB 0.30 Hz  
 GB 0  
 PC 1.00

Savych IS-176.1 13C DMSO

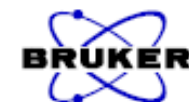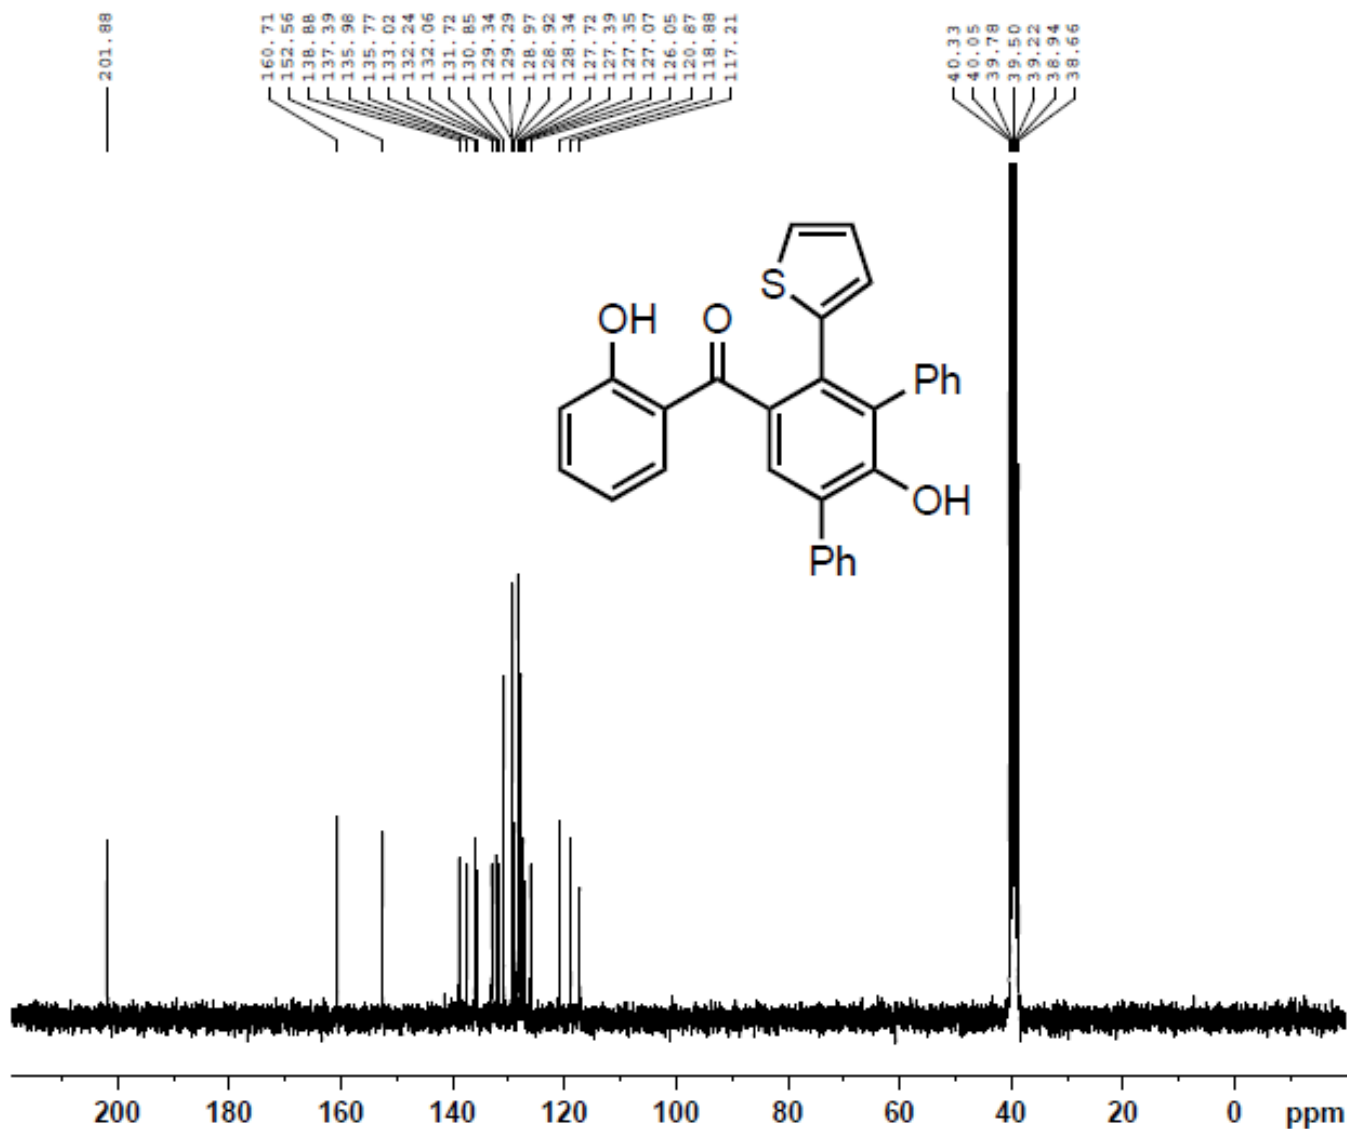

Current Data Parameters  
NAME 120514.u303 IS-176.1  
EXPNO 12  
PROCNO 1

F2 - Acquisition Parameters  
Date 20120515  
Time 2.31  
INSTRUM spect  
PROBHD 5 mm PABBO BB-  
PULPROG zgpg30  
TD 65536  
SOLVENT DMSO  
NS 1400  
DS 4  
SWH 18028.846 Hz  
FIDRES 0.275098 Hz  
AQ 1.8175818 sec  
RG 2050  
DW 27.733 usec  
DE 10.00 usec  
TE 298.2 K  
D1 2.00000000 sec  
D11 0.03000000 sec  
TD0 1

==== CHANNEL f1 =====  
NUC1 13C  
P1 10.00 usec  
PL1 -0.50 dB  
PL1W 33.25691986 W  
SFO1 75.4752953 MHz

==== CHANNEL f2 =====  
CPDPRG2 waltz16  
NUC2 1H  
PCPD2 72.00 usec  
PL2 0.00 dB  
PL12 17.00 dB  
PL13 17.00 dB  
PL2W 11.25325108 W  
PL12W 0.22453187 W  
PL13W 0.22453187 W  
SFO2 300.1312005 MHz

F2 - Processing parameters  
SI 32768  
SF 75.4677881 MHz  
WDW EM  
SSB 0  
LB 1.00 Hz  
GB 0  
PC 1.40

Savych IS-151 1H DMSO

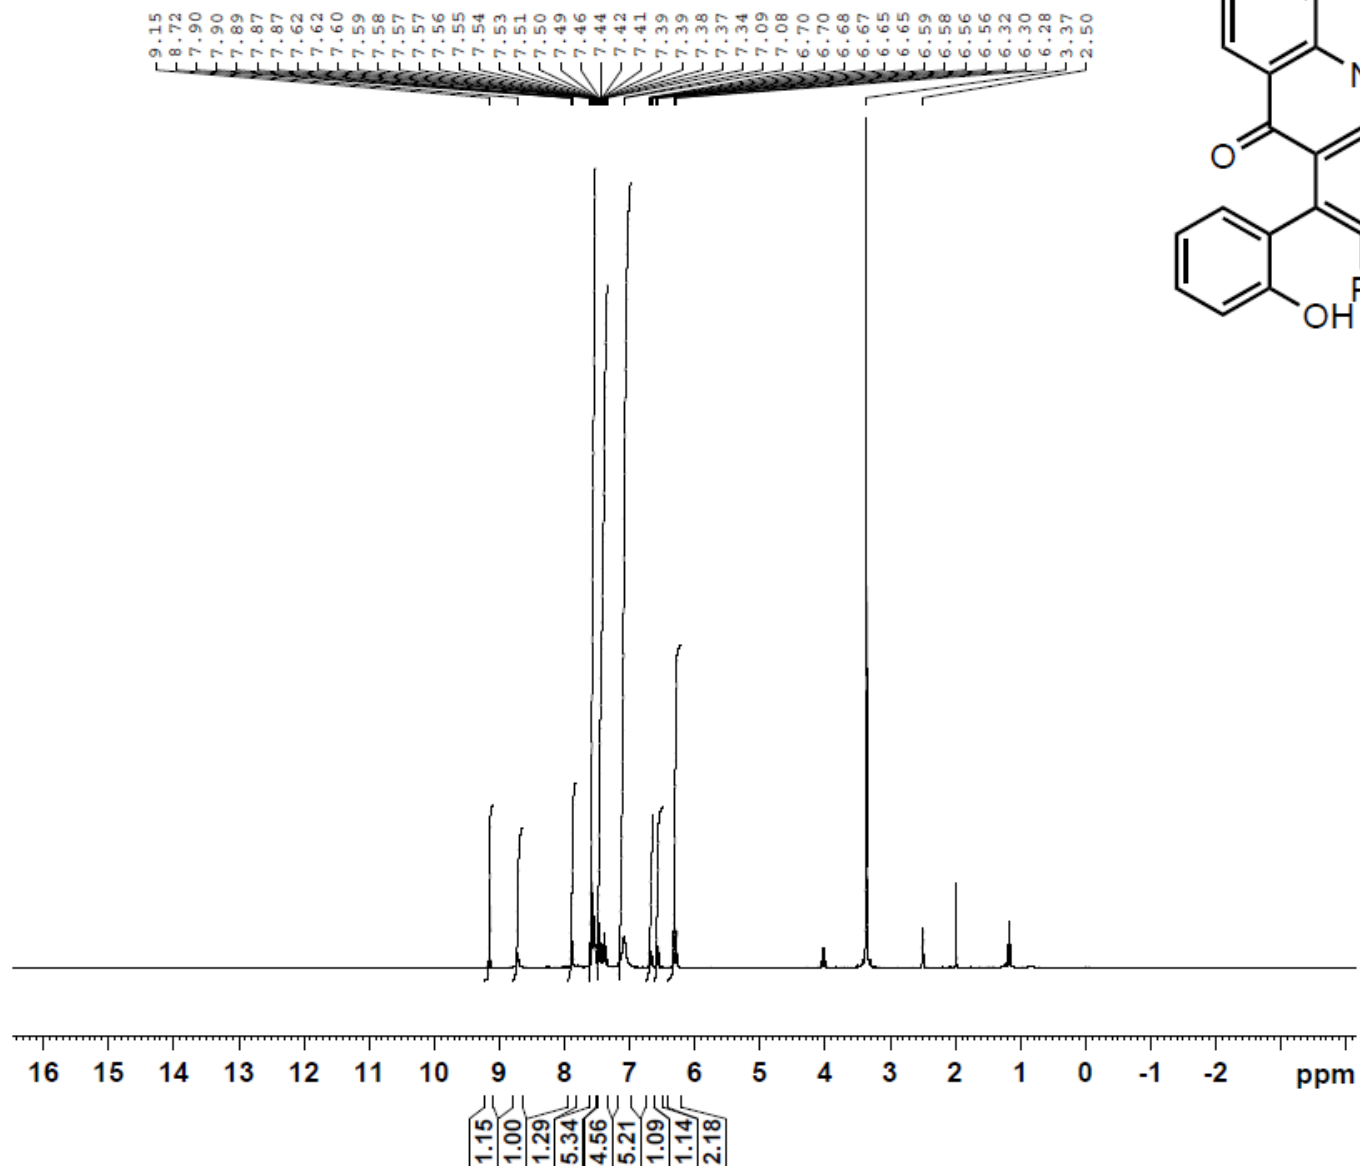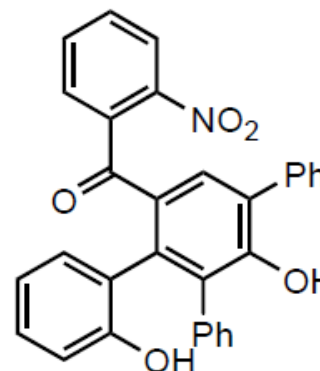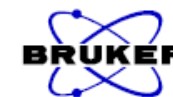

Current Data Parameters  
NAME 110902.u310 IS-151  
EXPNO 10  
PROCNO 1

F2 - Acquisition Parameters  
Date\_ 20110902  
Time 10.27  
INSTRUM spect  
PROBHD 5 mm PABBO BB-  
PULPROG zg30  
TD 65536  
SOLVENT DMSO  
NS 16  
DS 2  
SWH 6188.119 Hz  
FIDRES 0.094423 Hz  
AQ 5.2953587 sec  
RG 128  
DW 80.800 usec  
DE 10.00 usec  
TE 298.2 K  
D1 1.00000000 sec  
TD0 1

===== CHANNEL f1 =====  
NUC1 1H  
P1 10.00 usec  
PL1 0.00 dB  
PL1W 11.25325108 W  
SFO1 300.1318534 MHz

F2 - Processing parameters  
SI 32768  
SF 300.1300078 MHz  
WDW EM  
SSB 0  
LB 0.30 Hz  
GB 0  
PC 1.00

Savych IS-151 13C DMSO

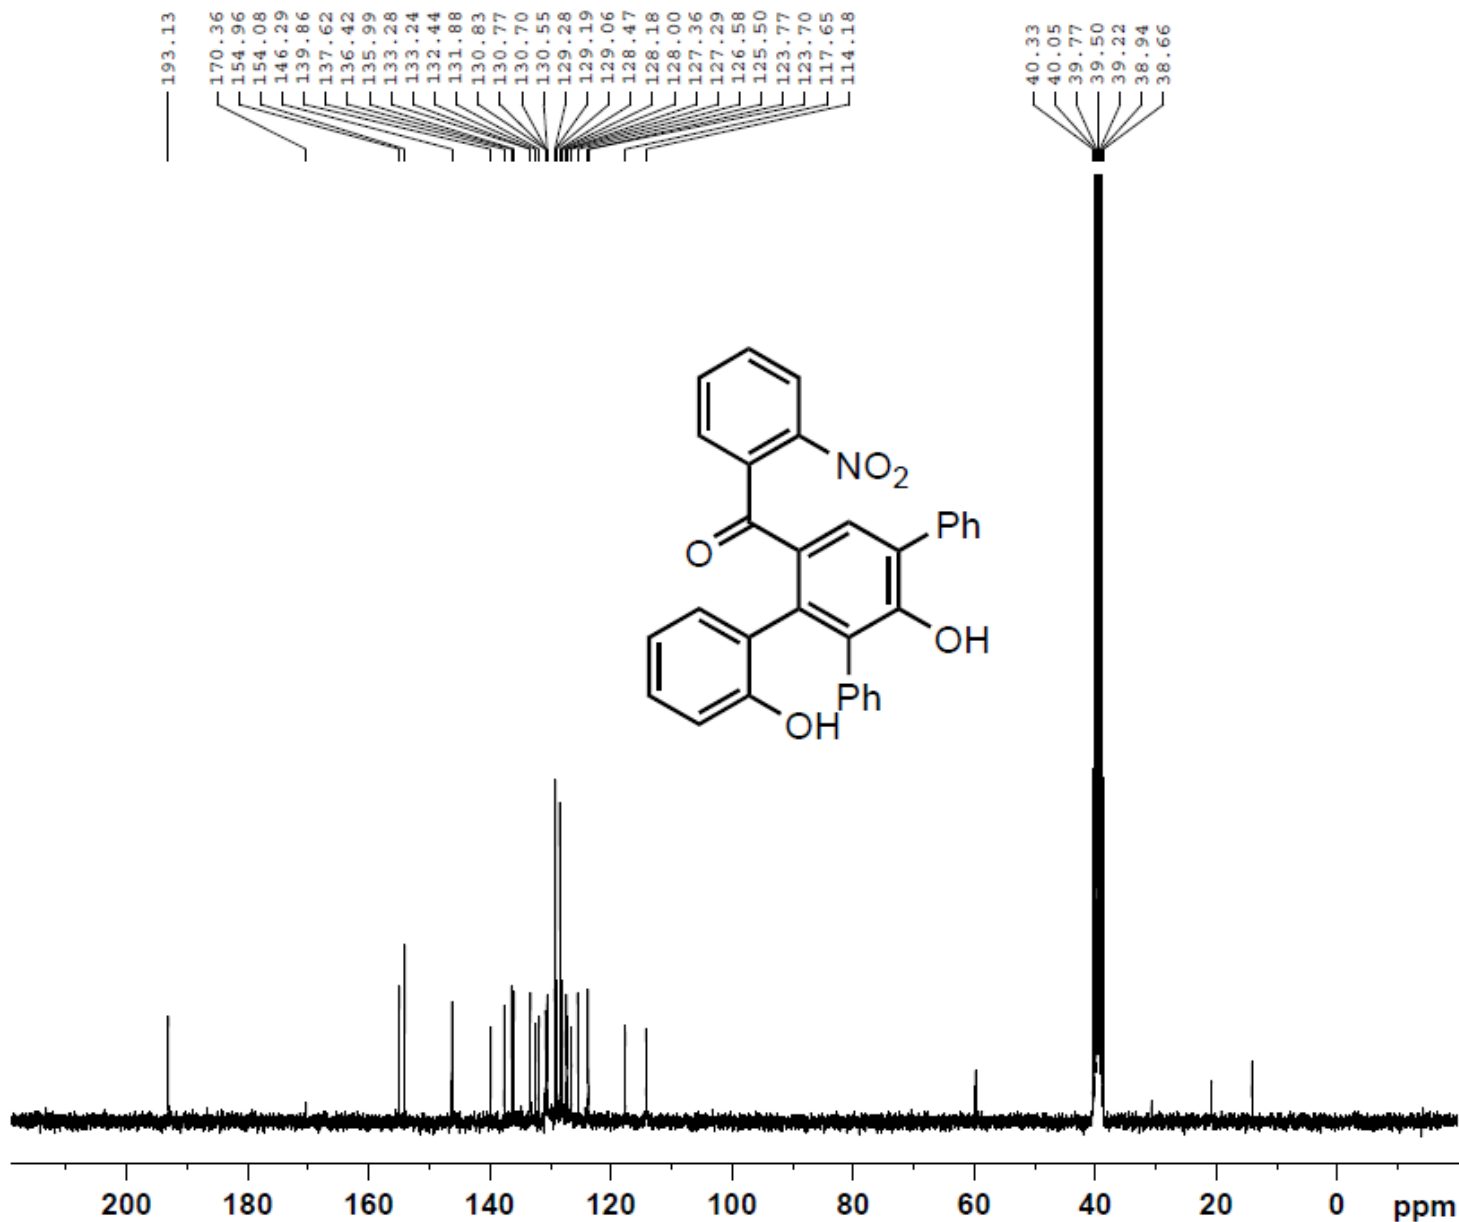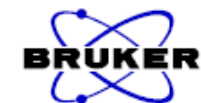

Current Data Parameters  
NAME 110902.u310 IS-151  
EXPNO 11  
PROCNO 1

F2 - Acquisition Parameters  
Date\_ 20110903  
Time 23.03  
INSTRUM spect  
PROBHD 5 mm PABBO BB-  
PULPROG zgpg30  
TD 65536  
SOLVENT DMSO  
NS 1400  
DS 4  
SWH 18028.846 Hz  
FIDRES 0.275098 Hz  
AQ 1.8175818 sec  
RG 2050  
DW 27.733 usec  
DE 10.00 usec  
TE 298.2 K  
D1 2.00000000 sec  
D11 0.03000000 sec  
TD0 1

===== CHANNEL f1 =====  
NUC1 13C  
P1 10.00 usec  
PL1 -0.50 dB  
PL1W 33.25691986 W  
SFO1 75.4752953 MHz

===== CHANNEL f2 =====  
CPDPRG2 waltz16  
NUC2 1H  
PCPD2 72.00 usec  
PL2 0.00 dB  
PL12 17.00 dB  
PL13 17.00 dB  
PL2W 11.25325108 W  
PL12W 0.22453187 W  
PL13W 0.22453187 W  
SFO2 300.1312005 MHz

F2 - Processing parameters  
SI 32768  
SF 75.4677854 MHz  
WDW EM  
SSB 0  
LB 1.00 Hz  
GB 0  
PC 1.40

Savych IS-174 1H DMSO

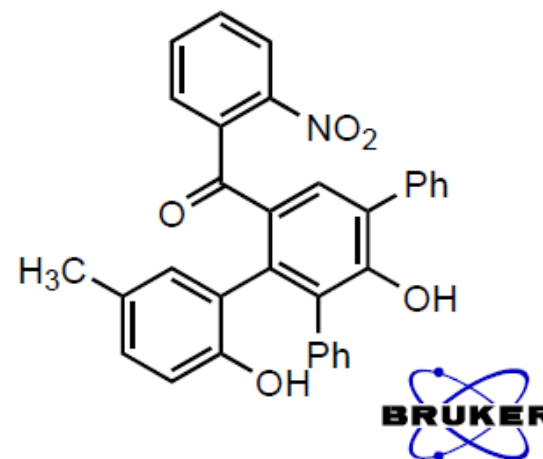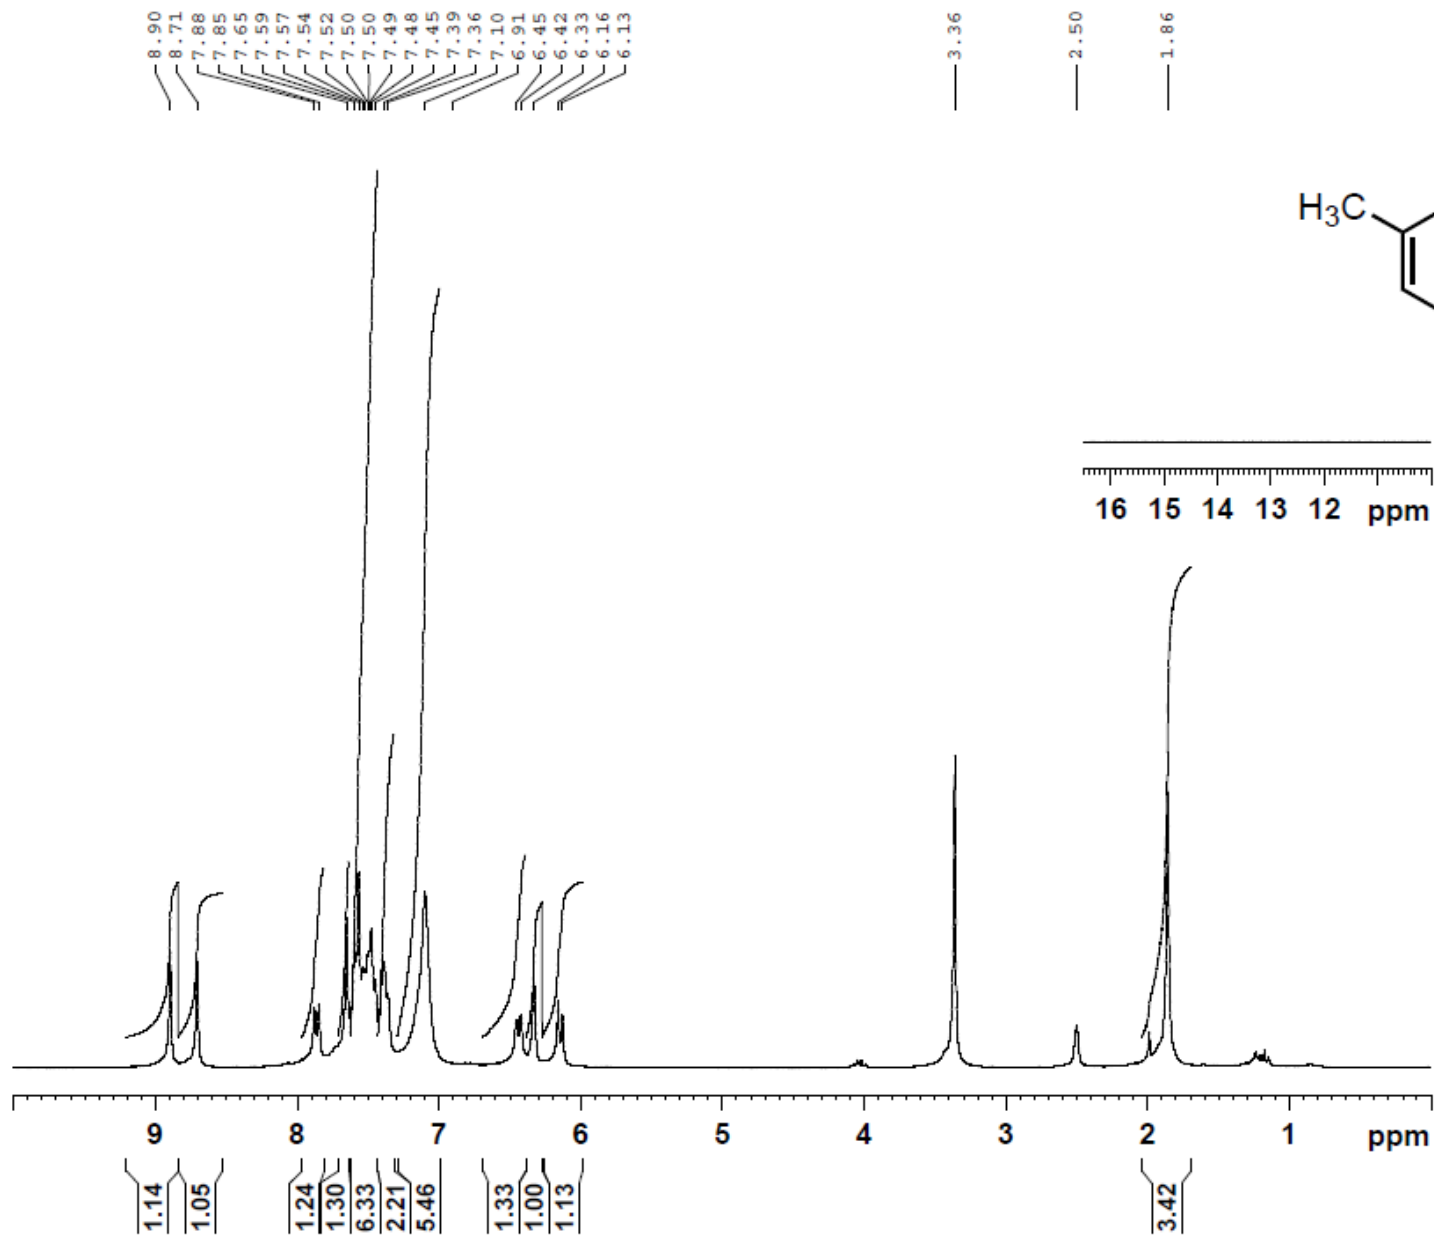

Current Data Parameters  
NAME 111028.209 IS-174  
EXPNO 10  
PROCNO 1

F2 - Acquisition Parameters  
Date\_ 20111028  
Time 10.56  
INSTRUM spect  
PROBHD 5 mm PABBO BB-  
PULPROG zg30  
TD 65536  
SOLVENT DMSO  
NS 16  
DS 2  
SWH 5165.289 Hz  
FIDRES 0.078816 Hz  
AQ 6.3439350 sec  
RG 256  
DW 96.800 usec  
DE 10.00 usec  
TE 298.1 K  
D1 1.00000000 sec  
TD0 1

===== CHANNEL f1 =====  
NUC1 1H  
P1 10.00 usec  
PL1 -2.50 dB  
SFO1 250.1315447 MHz

F2 - Processing parameters  
SI 32768  
SF 250.1299975 MHz  
WDW EM  
SSB 0  
LB 0.30 Hz  
GB 0  
PC 1.00

Savych IS-174 13C DMSO

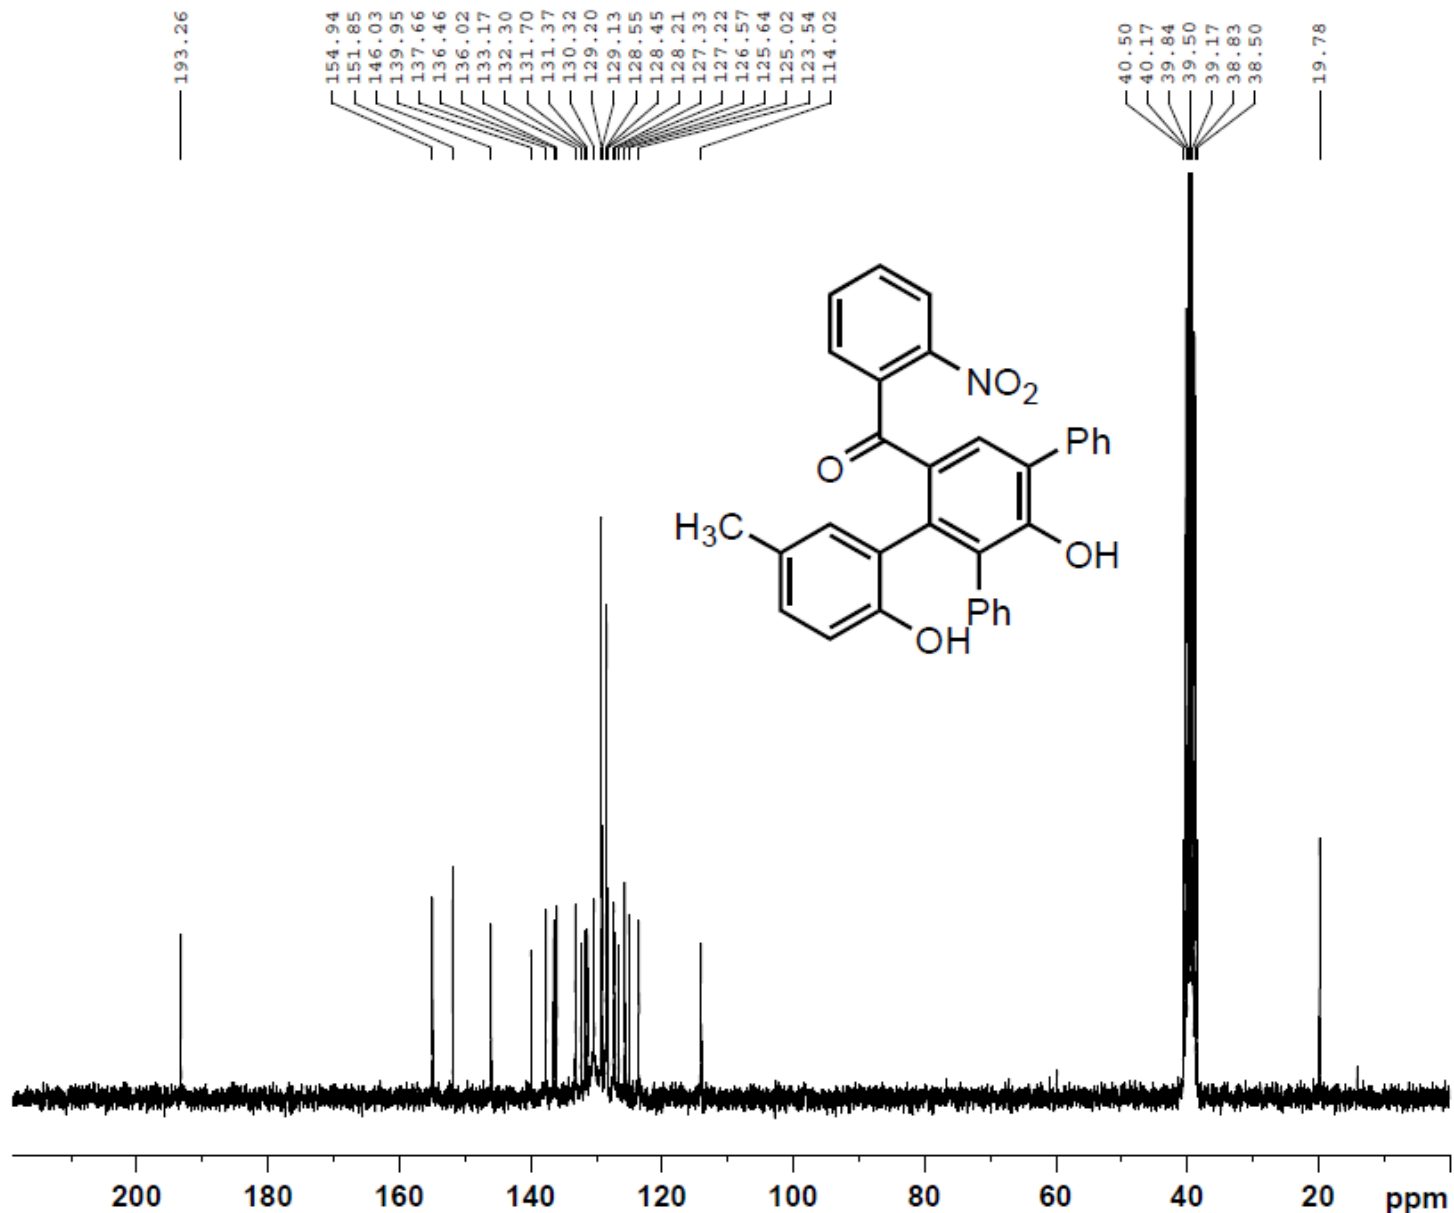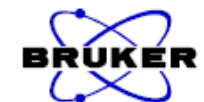

Current Data Parameters  
 NAME 111028.209 IS-174  
 EXPNO 11  
 PROCNO 1

F2 - Acquisition Parameters  
 Date\_ 20111028  
 Time 17.44  
 INSTRUM spect  
 PROBHD 5 mm PABBO BB-  
 PULPROG zgpg30  
 TD 65536  
 SOLVENT DMSO  
 NS 1024  
 DS 4  
 SWH 15000.000 Hz  
 FIDRES 0.228882 Hz  
 AQ 2.1845834 sec  
 RG 2050  
 DW 33.333 usec  
 DE 10.00 usec  
 TE 298.1 K  
 D1 2.00000000 sec  
 d11 0.03000000 sec  
 DELTA 1.89999998 sec  
 TD0 1

==== CHANNEL f1 =====  
 NUC1 13C  
 P1 10.00 usec  
 PL1 -1.00 dB  
 SFO1 62.9015280 MHz

==== CHANNEL f2 =====  
 CPDPRG2 waltz16  
 NUC2 1H  
 PCPD2 70.00 usec  
 PL12 15.00 dB  
 PL13 15.00 dB  
 PL2 -2.50 dB  
 SFO2 250.1310005 MHz

F2 - Processing parameters  
 SI 32768  
 SF 62.8952683 MHz  
 WDW EM  
 SSB 0  
 LB 1.00 Hz  
 GB 0  
 PC 1.40

Savych IS-163 1H DMSO

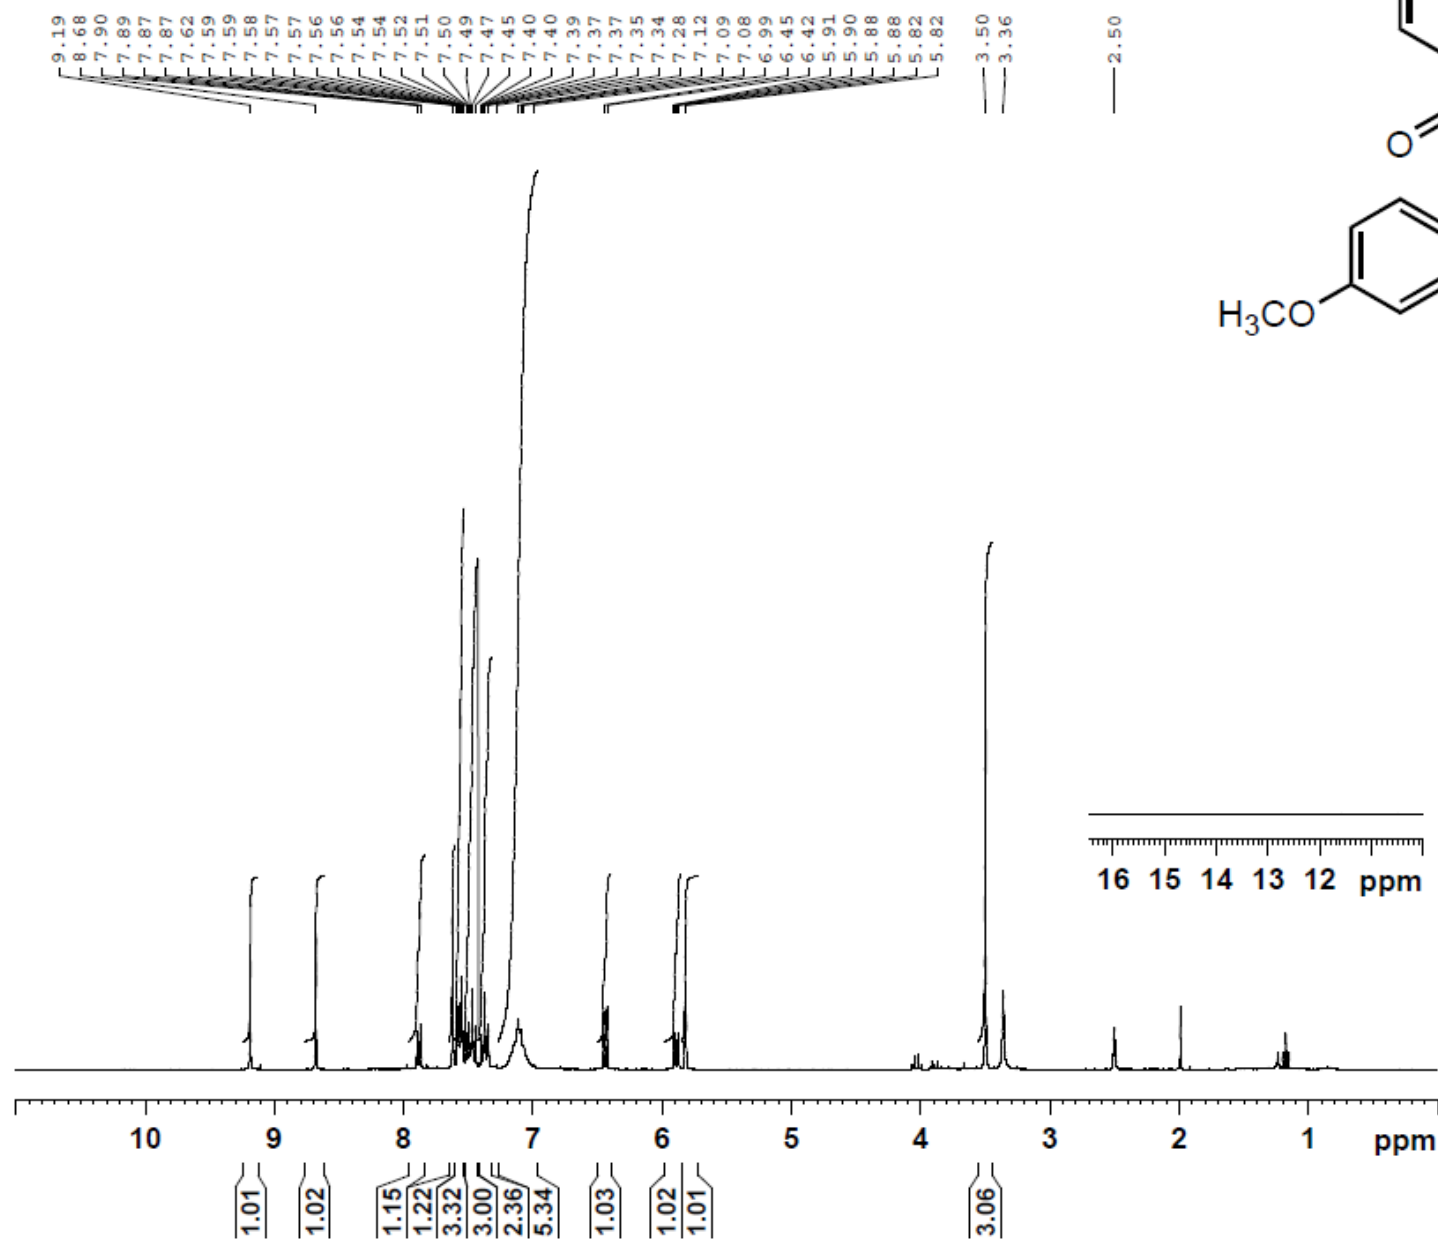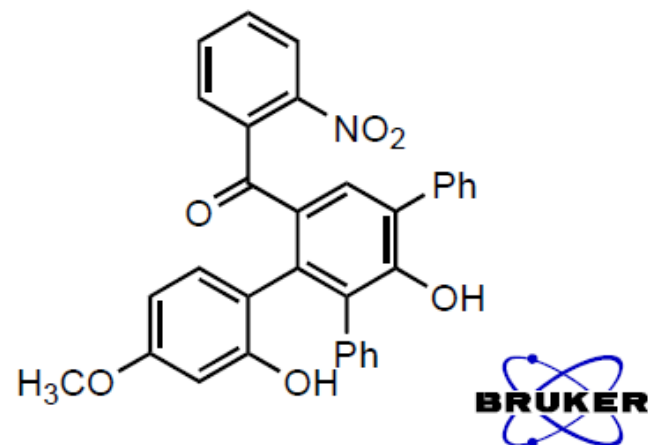

Current Data Parameters  
 NAME 110920.u304 IS-163  
 EXPNO 10  
 PROCNO 1

F2 - Acquisition Parameters  
 Date\_ 20110920  
 Time 7.58  
 INSTRUM spect  
 PROBHD 5 mm PABBO BB-  
 PULPROG zg30  
 TD 65536  
 SOLVENT DMSO  
 NS 16  
 DS 2  
 SWH 6188.119 Hz  
 FIDRES 0.094423 Hz  
 AQ 5.2953587 sec  
 RG 101  
 DW 80.800 usec  
 DE 10.00 usec  
 TE 296.4 K  
 D1 1.0000000 sec  
 TD0 1

===== CHANNEL f1 =====  
 NUC1 1H  
 P1 10.00 usec  
 PL1 0.00 dB  
 PL1W 11.25325108 W  
 SFO1 300.1318534 MHz

F2 - Processing parameters  
 SI 32768  
 SF 300.1300071 MHz  
 WDW EM  
 SSB 0  
 LB 0.30 Hz  
 GB 0  
 PC 1.00



Savych IS-163 13C DMSO

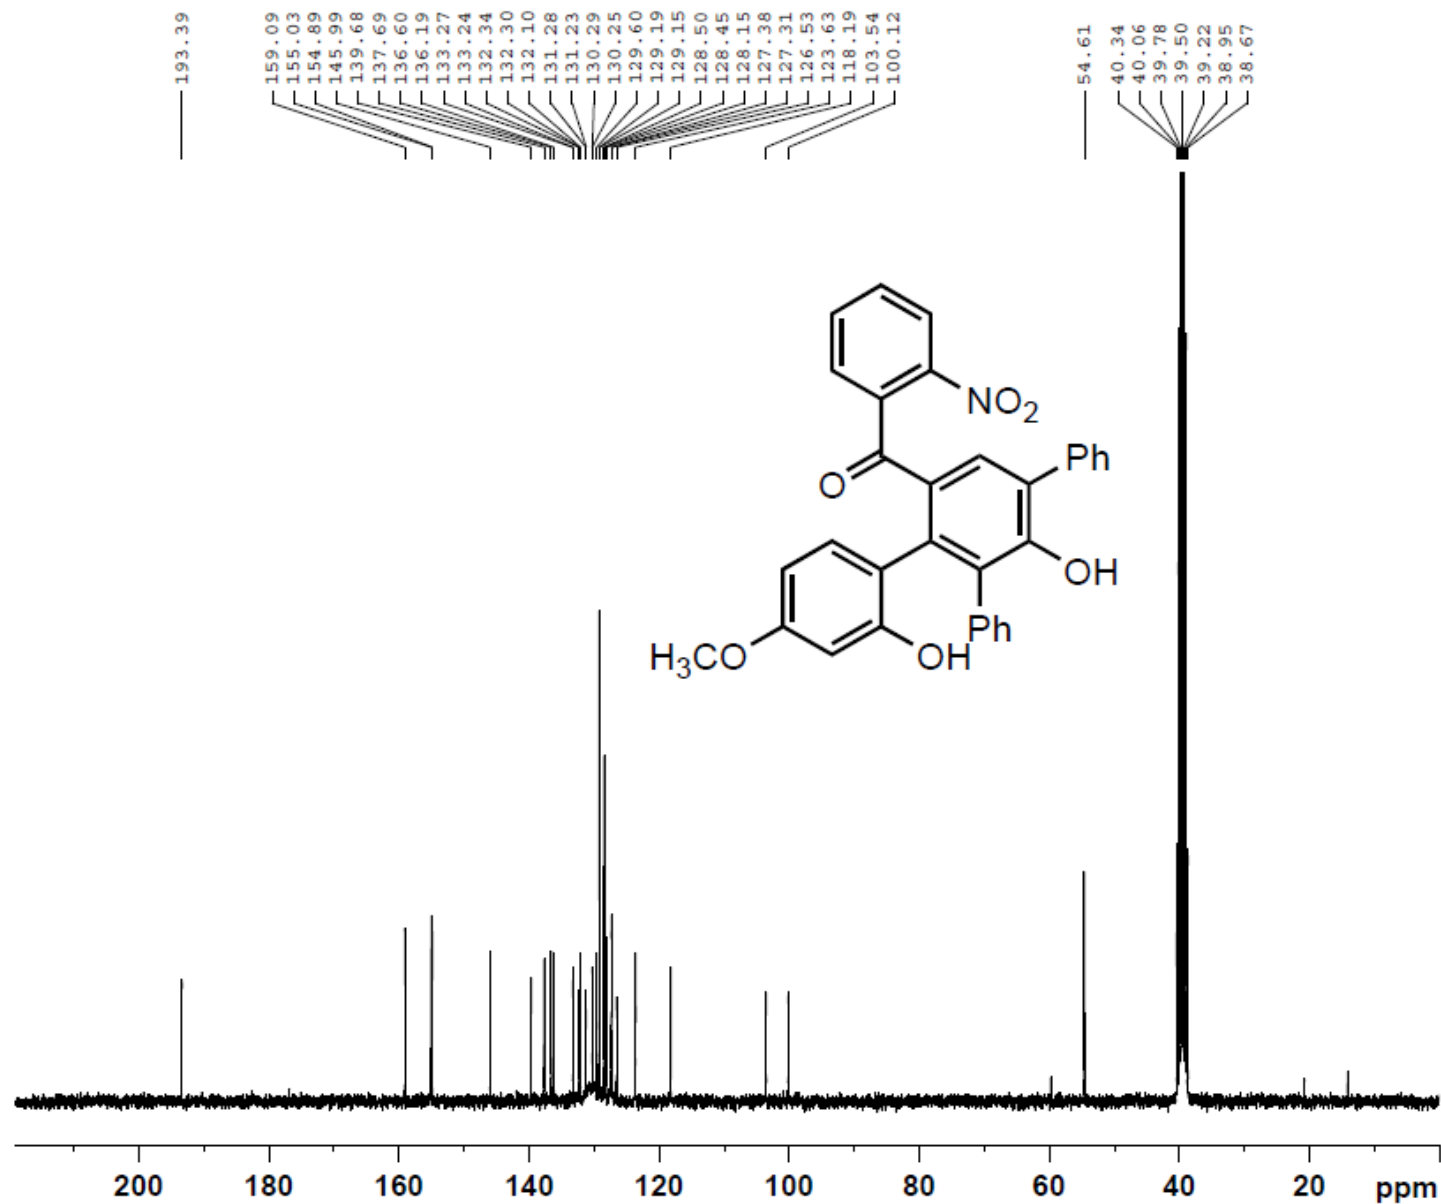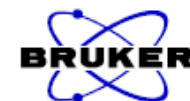

Current Data Parameters  
NAME 110920.u304 IS-163  
EXPNO 11  
PROCNO 1

F2 - Acquisition Parameters  
Date\_ 20110920  
Time 9.06  
INSTRUM spect  
PROBHD 5 mm PABBO BB-  
PULPROG zgpg30  
TD 65536  
SOLVENT DMSO  
NS 1024  
DS 4  
SWH 18028.846 Hz  
FIDRES 0.275098 Hz  
AQ 1.8175818 sec  
RG 2050  
DW 27.733 usec  
DE 10.00 usec  
TE 297.5 K  
D1 2.00000000 sec  
D11 0.03000000 sec  
TD0 1

===== CHANNEL f1 =====  
NUC1 13C  
P1 10.00 usec  
PL1 -0.50 dB  
PL1W 33.25691986 W  
SFO1 75.4752953 MHz

===== CHANNEL f2 =====  
CPDPRG2 waltz16  
NUC2 1H  
PCPD2 72.00 usec  
PL2 0.00 dB  
PL12 17.00 dB  
PL13 17.00 dB  
PL2W 11.25325108 W  
PL12W 0.22453187 W  
PL13W 0.22453187 W  
SFO2 300.1312005 MHz

F2 - Processing parameters  
SI 32768  
SF 75.4677865 MHz  
WDW EM  
SSB 0  
LB 1.00 Hz  
GB 0  
PC 1.40

Savych IS-208.1 1H DMSO

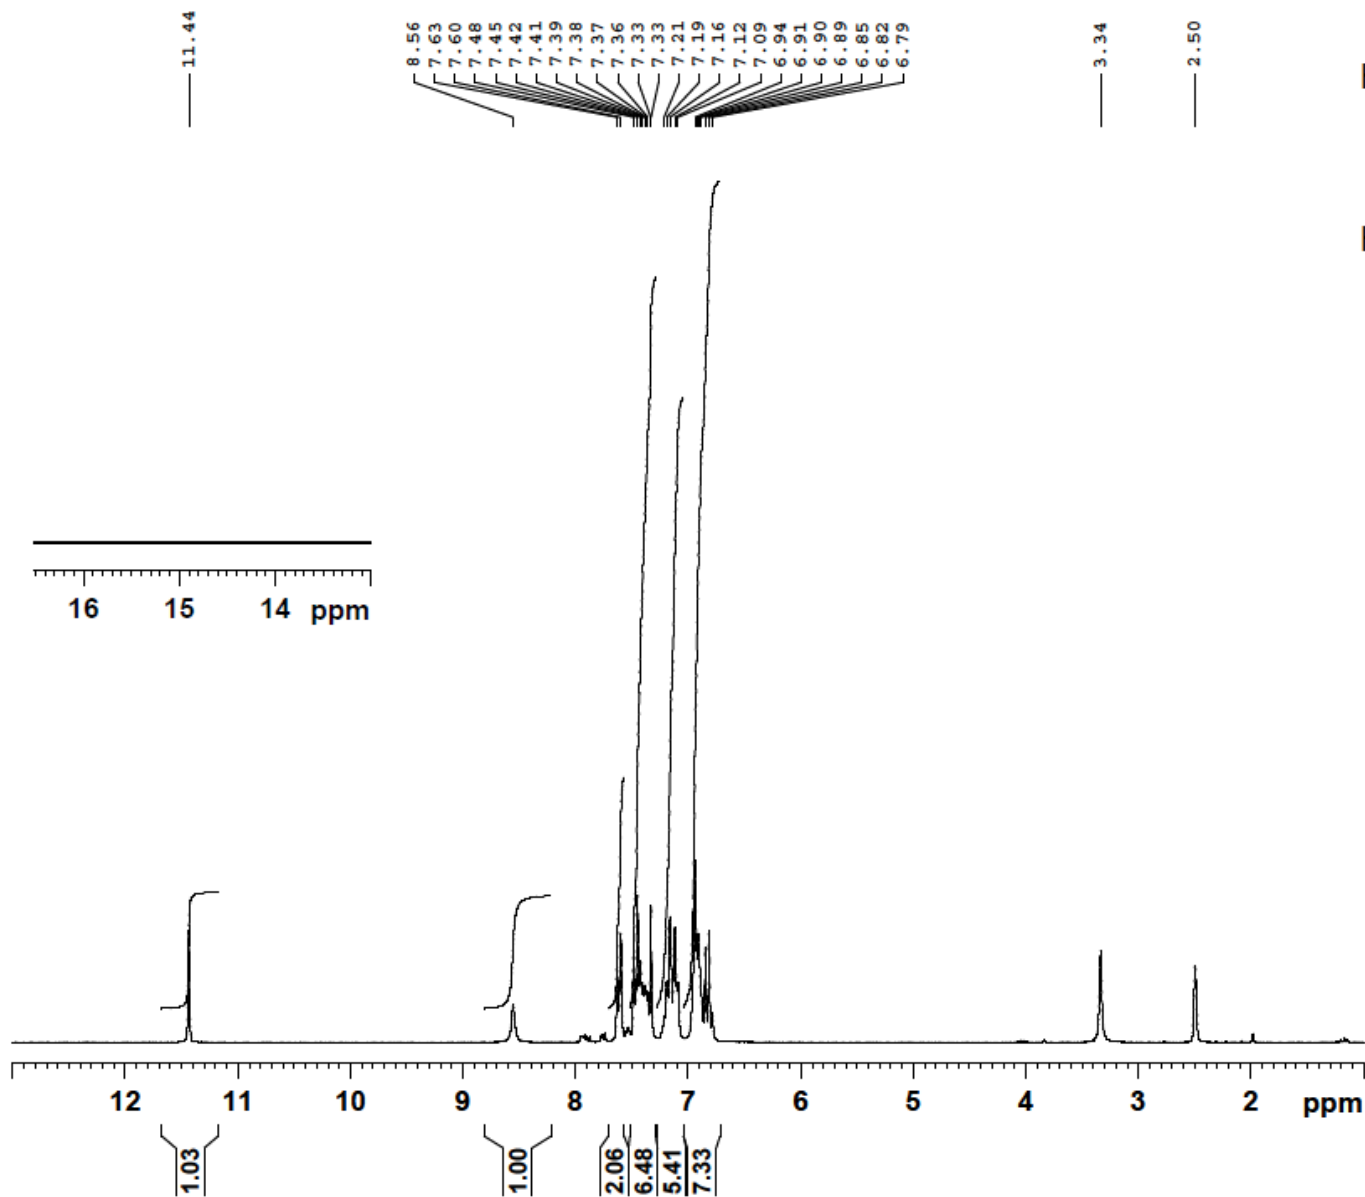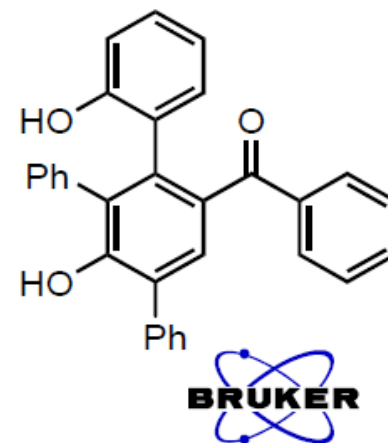

Current Data Parameters  
 NAME 120220.201  
 EXPNO 10  
 PROCNO 1

F2 - Acquisition Parameters  
 Date\_ 20120220  
 Time 8.38  
 INSTRUM spect  
 PROBHD 5 mm QNP 1H/13  
 PULPROG zg30  
 TD 65536  
 SOLVENT DMSO  
 NS 16  
 DS 2  
 SWH 5165.289 Hz  
 FIDRES 0.078816 Hz  
 AQ 6.3439350 sec  
 RG 645  
 DW 96.800 usec  
 DE 10.00 usec  
 TE 298.1 K  
 D1 1.00000000 sec  
 TD0 1

===== CHANNEL f1 =====  
 NUC1 1H  
 P1 11.40 usec  
 PL1 -3.00 dB  
 SFO1 250.1315447 MHz

F2 - Processing parameters  
 SI 32768  
 SF 250.1299947 MHz  
 WDW EM  
 SSB 0  
 LB 0.30 Hz  
 GB 0  
 PC 1.00

Savych IS-208.1 13C CDCl3

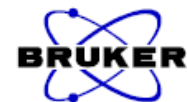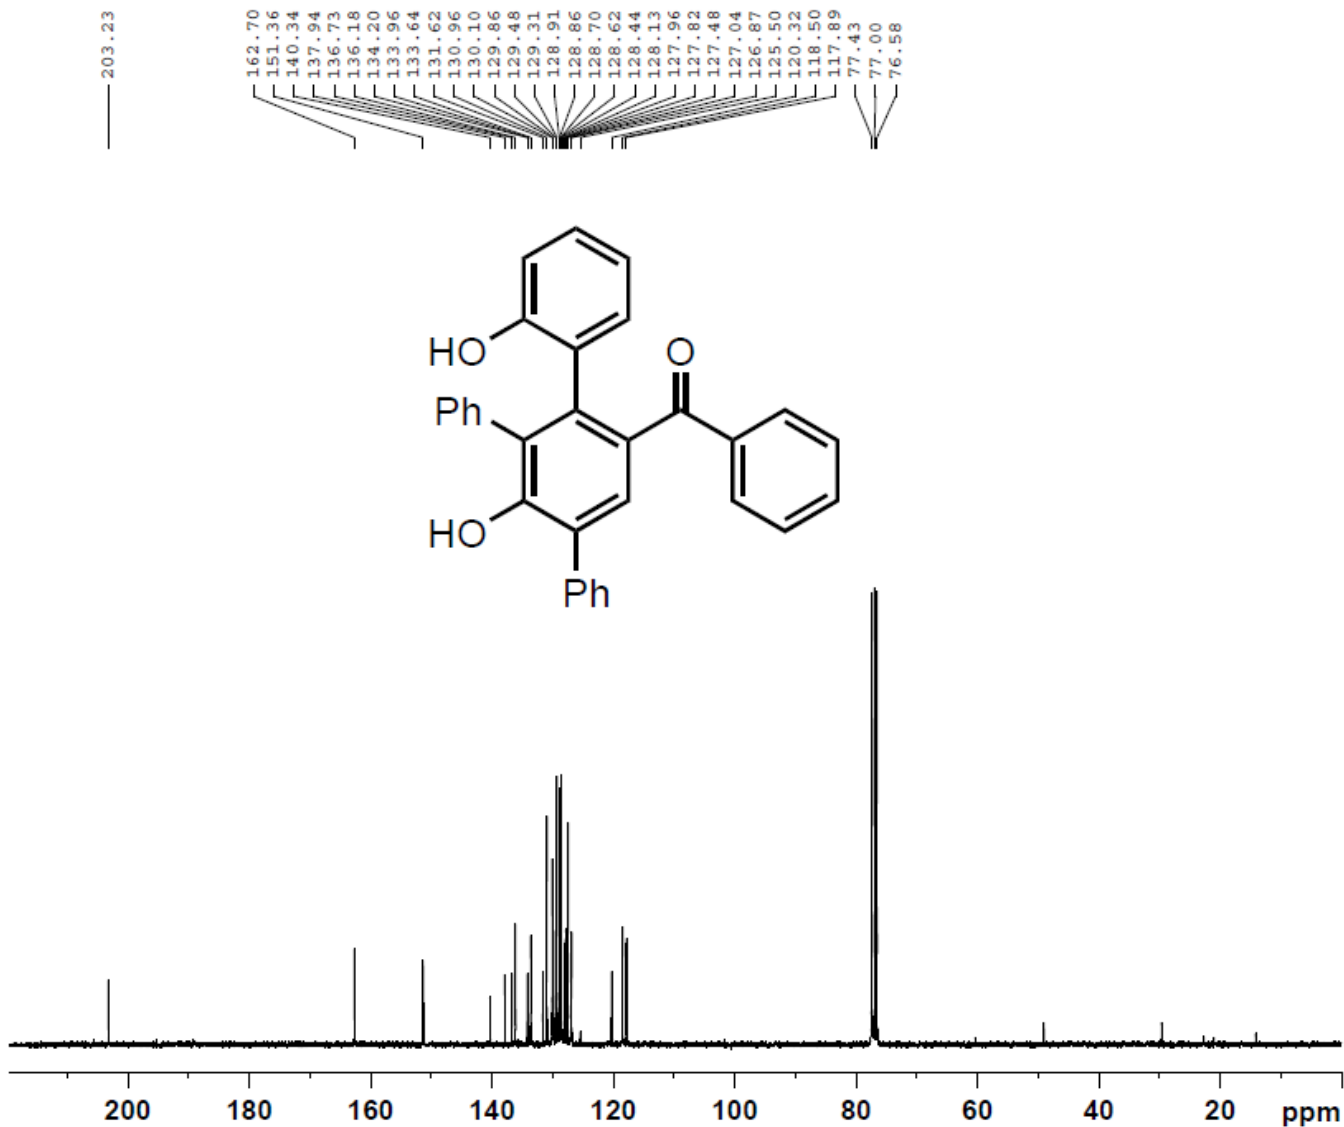

Current Data Parameters  
 NAME 120309.u312  
 EXPNO 11  
 PROCNO 1

F2 - Acquisition Parameters  
 Date\_ 20120310  
 Time 3.48  
 INSTRUM spect  
 PROBHD 5 mm PABBO BB-  
 PULPROG zgpg30  
 TD 65536  
 SOLVENT CDCl3  
 NS 2048  
 DS 4  
 SWH 18028.846 Hz  
 FIDRES 0.275098 Hz  
 AQ 1.8175818 sec  
 RG 2050  
 DW 27.733 usec  
 DE 10.00 usec  
 TE 298.2 K  
 D1 2.0000000 sec  
 D11 0.0300000 sec  
 TD0 1

===== CHANNEL f1 =====  
 NUC1 13C  
 P1 10.00 usec  
 PL1 -0.50 dB  
 PL1W 33.25691986 W  
 SFO1 75.4752953 MHz

===== CHANNEL f2 =====  
 CPDPRG2 waltz16  
 NUC2 1H  
 PCPD2 72.00 usec  
 PL2 0.00 dB  
 PL12 17.00 dB  
 PL13 17.00 dB  
 PL2W 11.25325108 W  
 PL12W 0.22453187 W  
 PL13W 0.22453187 W  
 SFO2 300.1312005 MHz

F2 - Processing parameters  
 SI 32768  
 SF 75.4677525 MHz  
 WDW EM  
 SSB 0  
 LB 1.00 Hz  
 GB 0  
 PC 1.40

Savych IS-176.4 1H DMSO

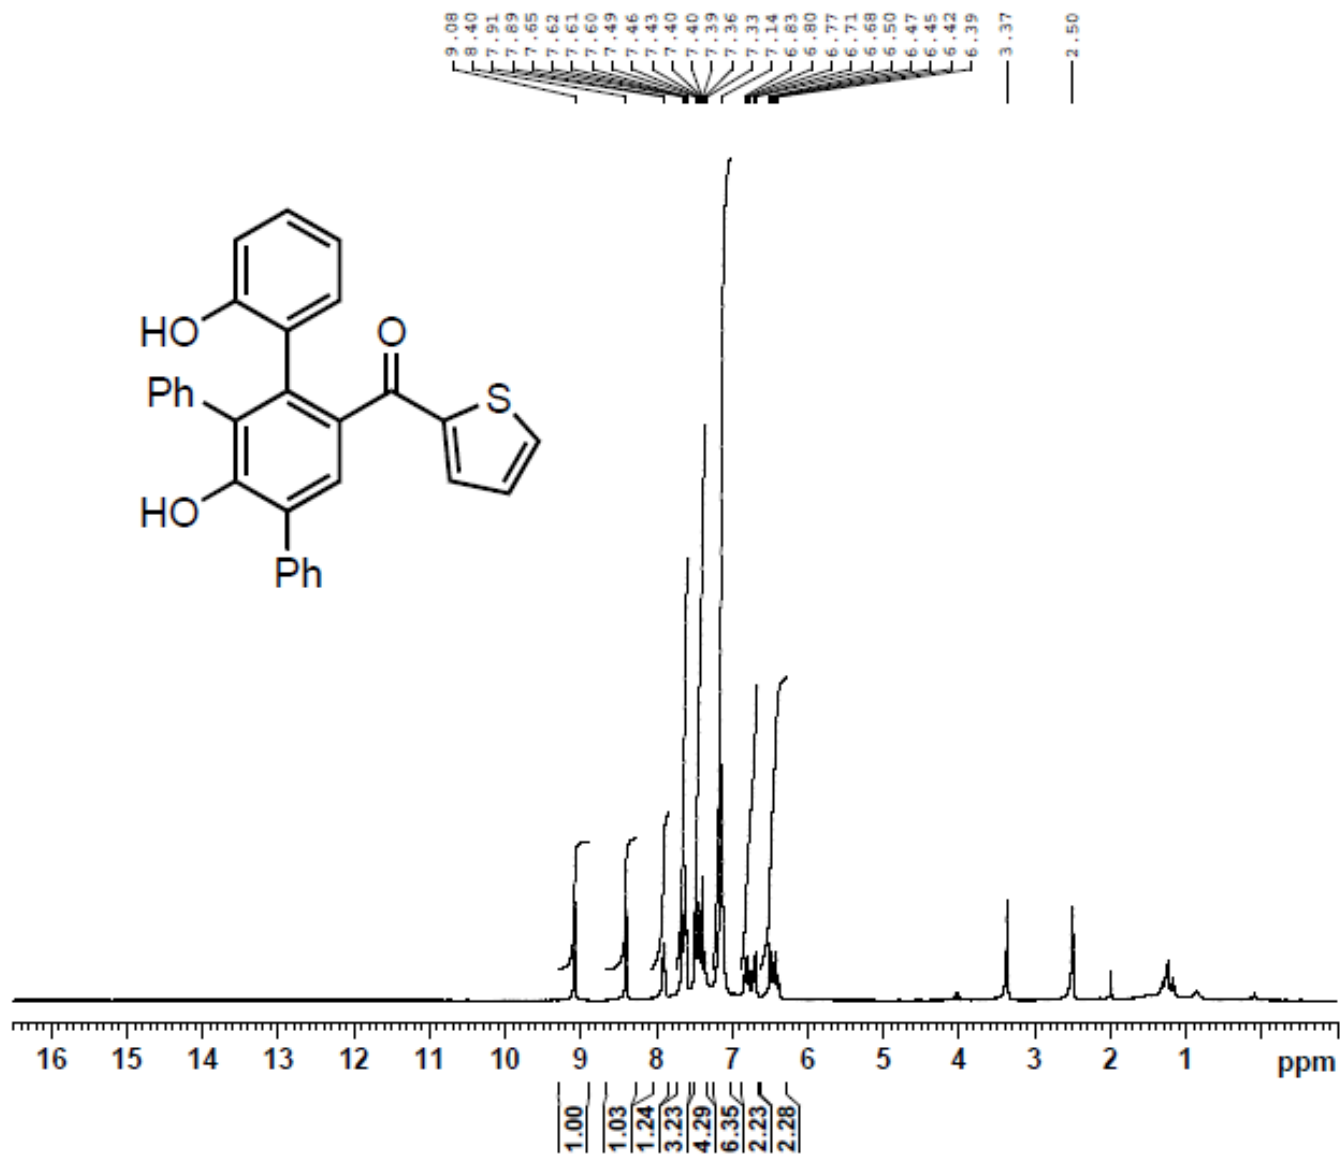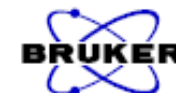

Current Data Parameters  
NAME 120711.201 IS-176.4  
EXPNO 10  
PROCNO 1

F2 - Acquisition Parameters  
Date\_ 20120711  
Time 8.13  
INSTRUM spect  
PROBHD 5 mm PABBO BB-  
PULPROG zg30  
TD 65536  
SOLVENT DMSO  
NS 16  
DS 2  
SWH 5165.289 Hz  
FIDRES 0.078816 Hz  
AQ 6.3439350 sec  
RG 181  
DW 96.800 usec  
DE 10.00 usec  
TE 298.2 K  
D1 1.0000000 sec  
TD0 1

===== CHANNEL f1 =====  
NUC1 1H  
P1 10.00 usec  
PL1 -2.50 dB  
SFO1 250.1315447 MHz

F2 - Processing parameters  
SI 32768  
SF 250.1299980 MHz  
WDW EM  
SSB 0  
LB 0.30 Hz  
GB 0  
PC 1.00

Savych IS-176.2 13C DMSO

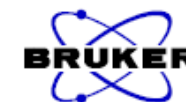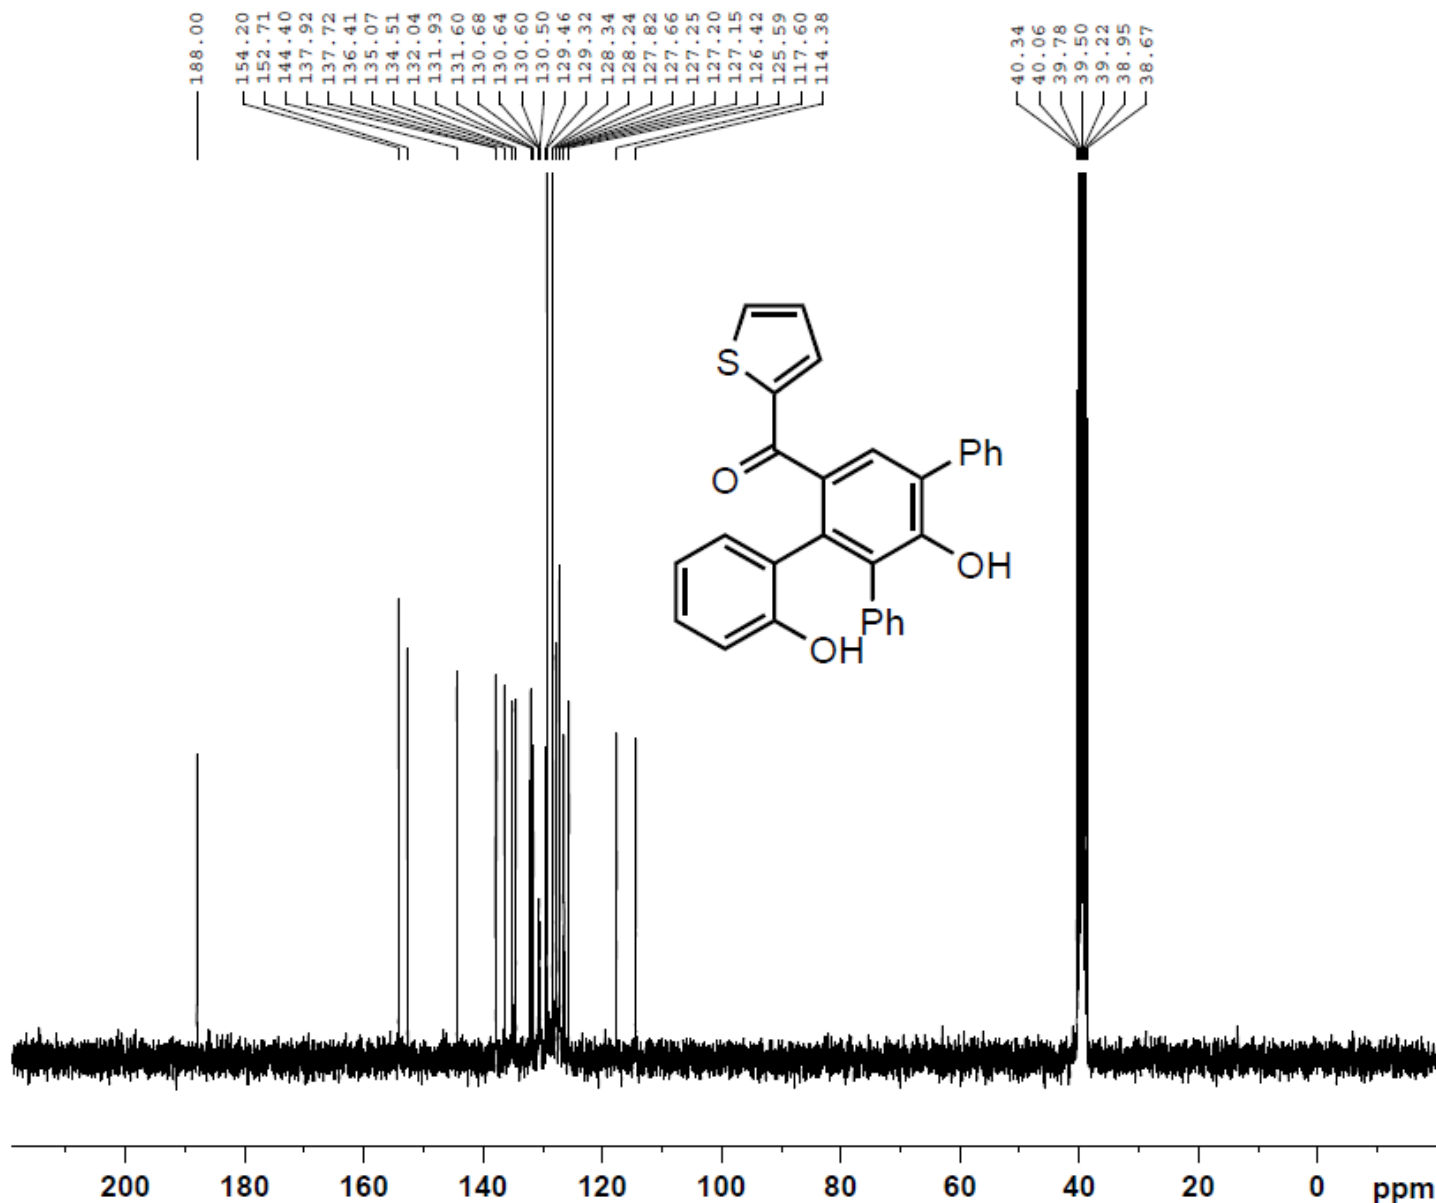

Current Data Parameters  
NAME 111026.u310 IS-176.2  
EXPNO 12  
PROCNO 1

F2 - Acquisition Parameters  
Date\_ 20111026  
Time 21.20  
INSTRUM spect  
PROBHD 5 mm PABBO BB-  
PULPROG zgpg30  
TD 65536  
SOLVENT DMSO  
NS 1024  
DS 4  
SWH 18028.846 Hz  
FIDRES 0.275098 Hz  
AQ 1.8175818 sec  
RG 2050  
DW 27.733 usec  
DE 10.00 usec  
TE 298.2 K  
D1 2.00000000 sec  
D11 0.03000000 sec  
TD0 1

===== CHANNEL f1 =====  
NUC1 13C  
P1 10.00 usec  
PL1 -0.50 dB  
PL1W 33.25691986 W  
SFO1 75.4752953 MHz

===== CHANNEL f2 =====  
CPDPRG2 waltz16  
NUC2 1H  
PCPD2 72.00 usec  
PL2 0.00 dB  
PL12 17.00 dB  
PL13 17.00 dB  
PL2W 11.25325108 W  
PL12W 0.22453187 W  
PL13W 0.22453187 W  
SFO2 300.1312005 MHz

F2 - Processing parameters  
SI 32768  
SF 75.4677870 MHz  
WDW EM  
SSB 0  
LB 1.00 Hz  
GB 0  
PC 1.40

Savych IS-124 1H DMSO

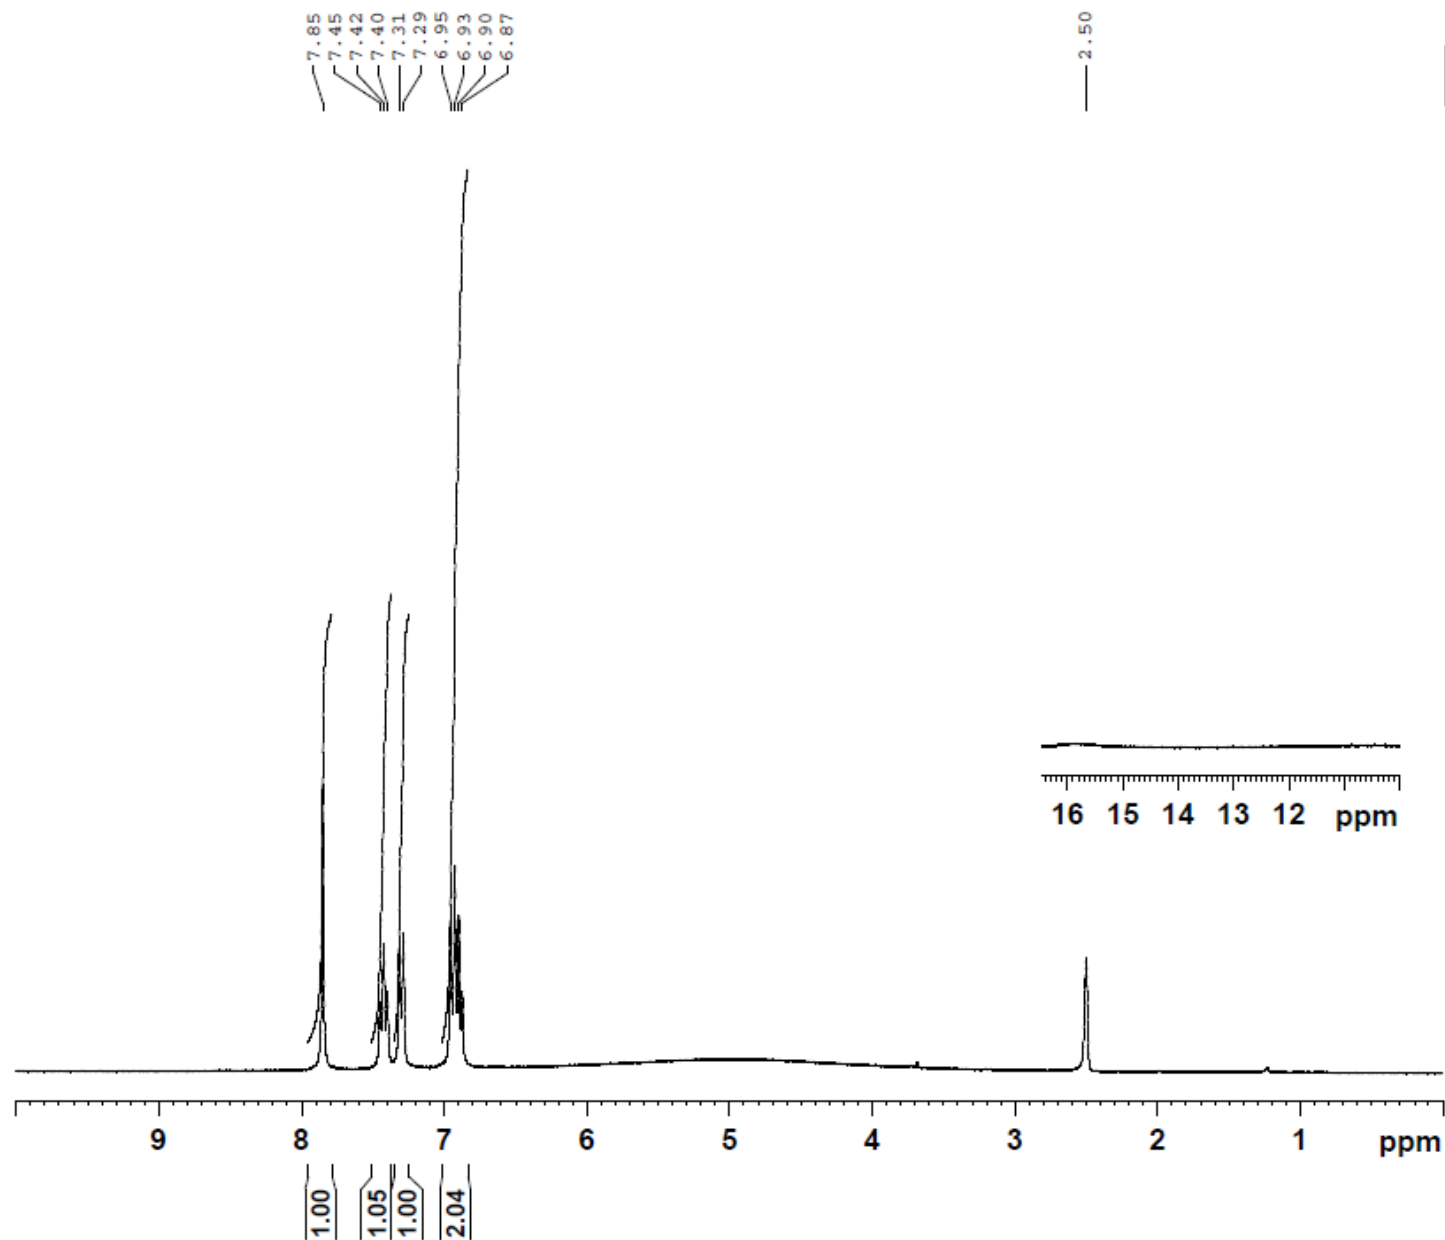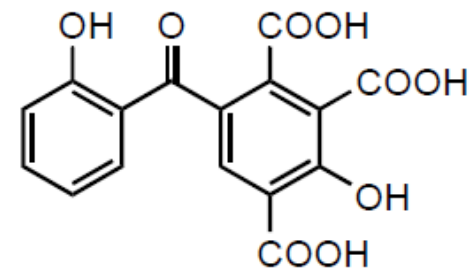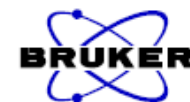

Current Data Parameters  
NAME 110616.u309 IS-124  
EXPNO 10  
PROCNO 1

F2 - Acquisition Parameters  
Date\_ 20110616  
Time 10.51  
INSTRUM spect  
PROBHD 5 mm PABBO BB-  
PULPROG zg30  
TD 65536  
SOLVENT DMSO  
NS 16  
DS 2  
SWH 6188.119 Hz  
FIDRES 0.094423 Hz  
AQ 5.2953587 sec  
RG 114  
DW 80.800 usec  
DE 10.00 usec  
TE 298.2 K  
D1 1.00000000 sec  
TD0 1

===== CHANNEL f1 =====  
NUC1 1H  
P1 10.00 usec  
PL1 0.00 dB  
PL1W 11.25325108 W  
SFO1 300.1318534 MHz

F2 - Processing parameters  
SI 32768  
SF 300.1300106 MHz  
WDW no  
SSB 0  
LB 0.00 Hz  
GB 0  
PC 1.00

Savych IS-124 13C DMSO

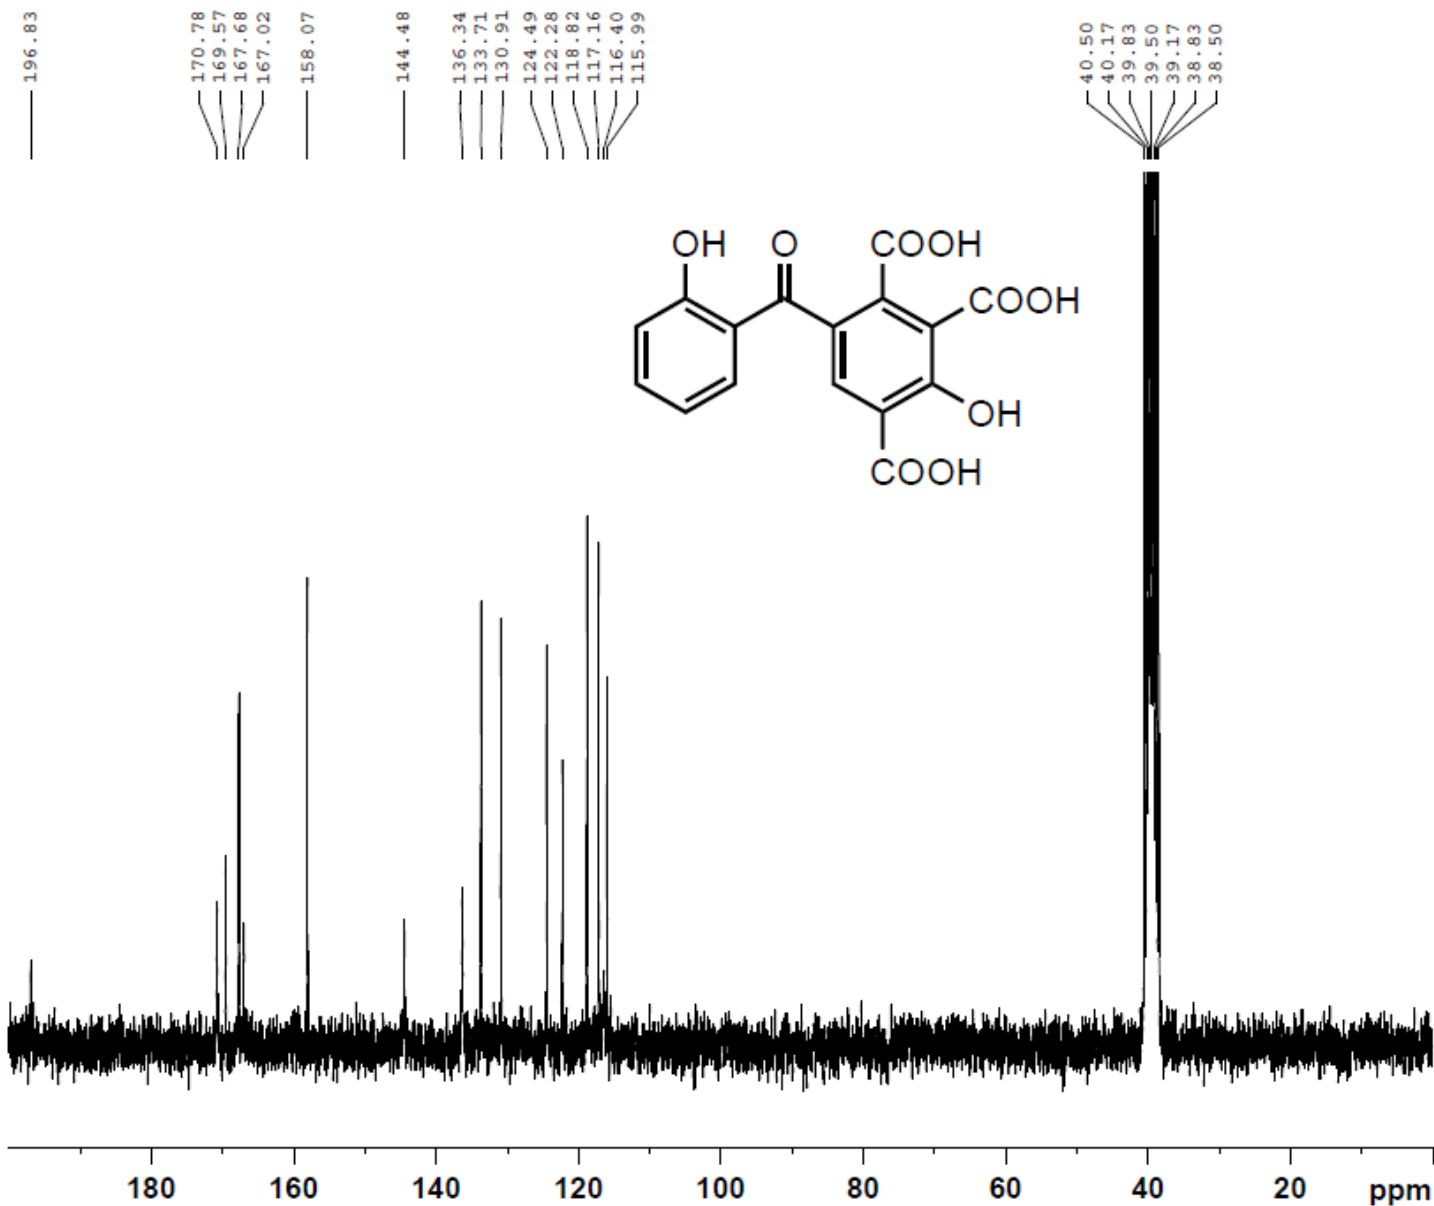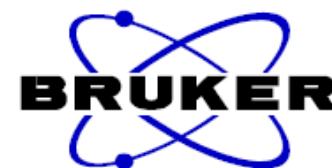

Current Data Parameters  
NAME 110616.206  
EXPNO 10  
PROCNO 1

F2 - Acquisition Parameters  
Date\_ 20110617  
Time 4.35  
INSTRUM spect  
PROBHD 5 mm PABBO BB-  
PULPROG zgpg30  
TD 65536  
SOLVENT DMSO  
NS 1024  
DS 4  
SWH 15000.000 Hz  
FIDRES 0.228882 Hz  
AQ 2.1845834 sec  
RG 2050  
DW 33.333 usec  
DE 10.00 usec  
TE 297.8 K  
D1 2.00000000 sec  
d11 0.03000000 sec  
DELTA 1.89999998 sec  
TD0 1

===== CHANNEL f1 =====  
NUC1 13C  
P1 10.00 usec  
PL1 -1.00 dB  
SFO1 62.9015280 MHz

===== CHANNEL f2 =====  
CPDPRG2 waltz16  
NUC2 1H  
PCPD2 70.00 usec  
PL12 15.00 dB  
PL13 15.00 dB  
PL2 -2.50 dB  
SFO2 250.1310005 MHz

F2 - Processing parameters  
SI 32768  
SF 62.8952651 MHz  
WDW EM  
SSB 0  
LB 1.00 Hz  
GB 0  
PC 1.40

Savych IS-139 1H DMSO

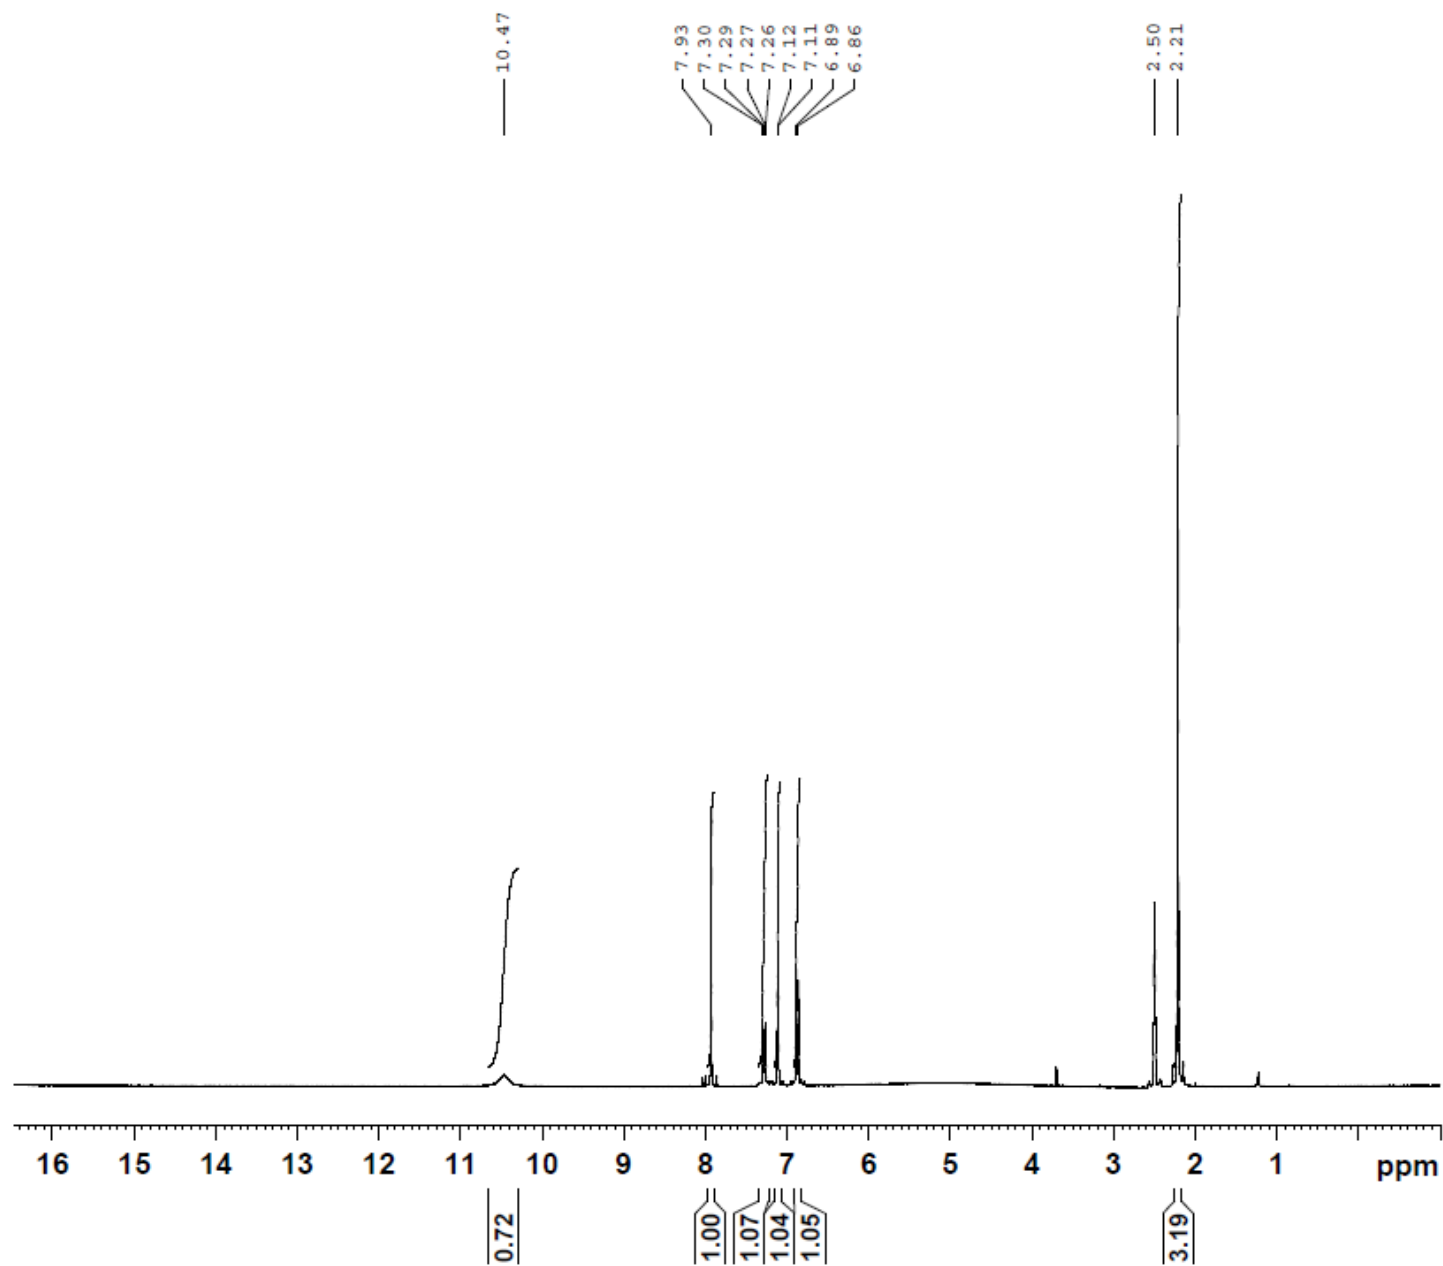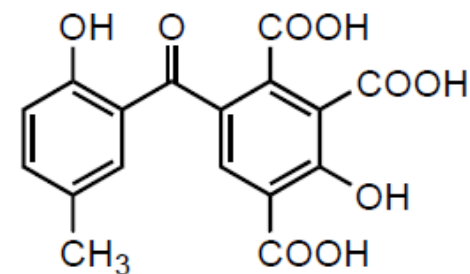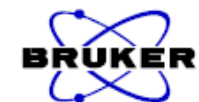

Current Data Parameters  
NAME 110725.u324 IS-139  
EXPNO 10  
PROCNO 1

F2 - Acquisition Parameters  
Date\_ 20110725  
Time 13.19  
INSTRUM spect  
PROBHD 5 mm PABBO BB-  
PULPROG zg30  
TD 65536  
SOLVENT DMSO  
NS 16  
DS 2  
SWH 6188.119 Hz  
FIDRES 0.094423 Hz  
AQ 5.2953587 sec  
RG 161  
DW 80.800 usec  
DE 10.00 usec  
TE 298.2 K  
D1 1.00000000 sec  
TD0 1

===== CHANNEL f1 =====  
NUC1 1H  
P1 10.00 usec  
PL1 0.00 dB  
PL1W 11.25325108 W  
SFO1 300.1318534 MHz

F2 - Processing parameters  
SI 32768  
SF 300.1300073 MHz  
WDW EM  
SSB 0  
LB 0.30 Hz  
GB 0  
PC 1.00



Savych IS-139 13C DMSO

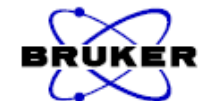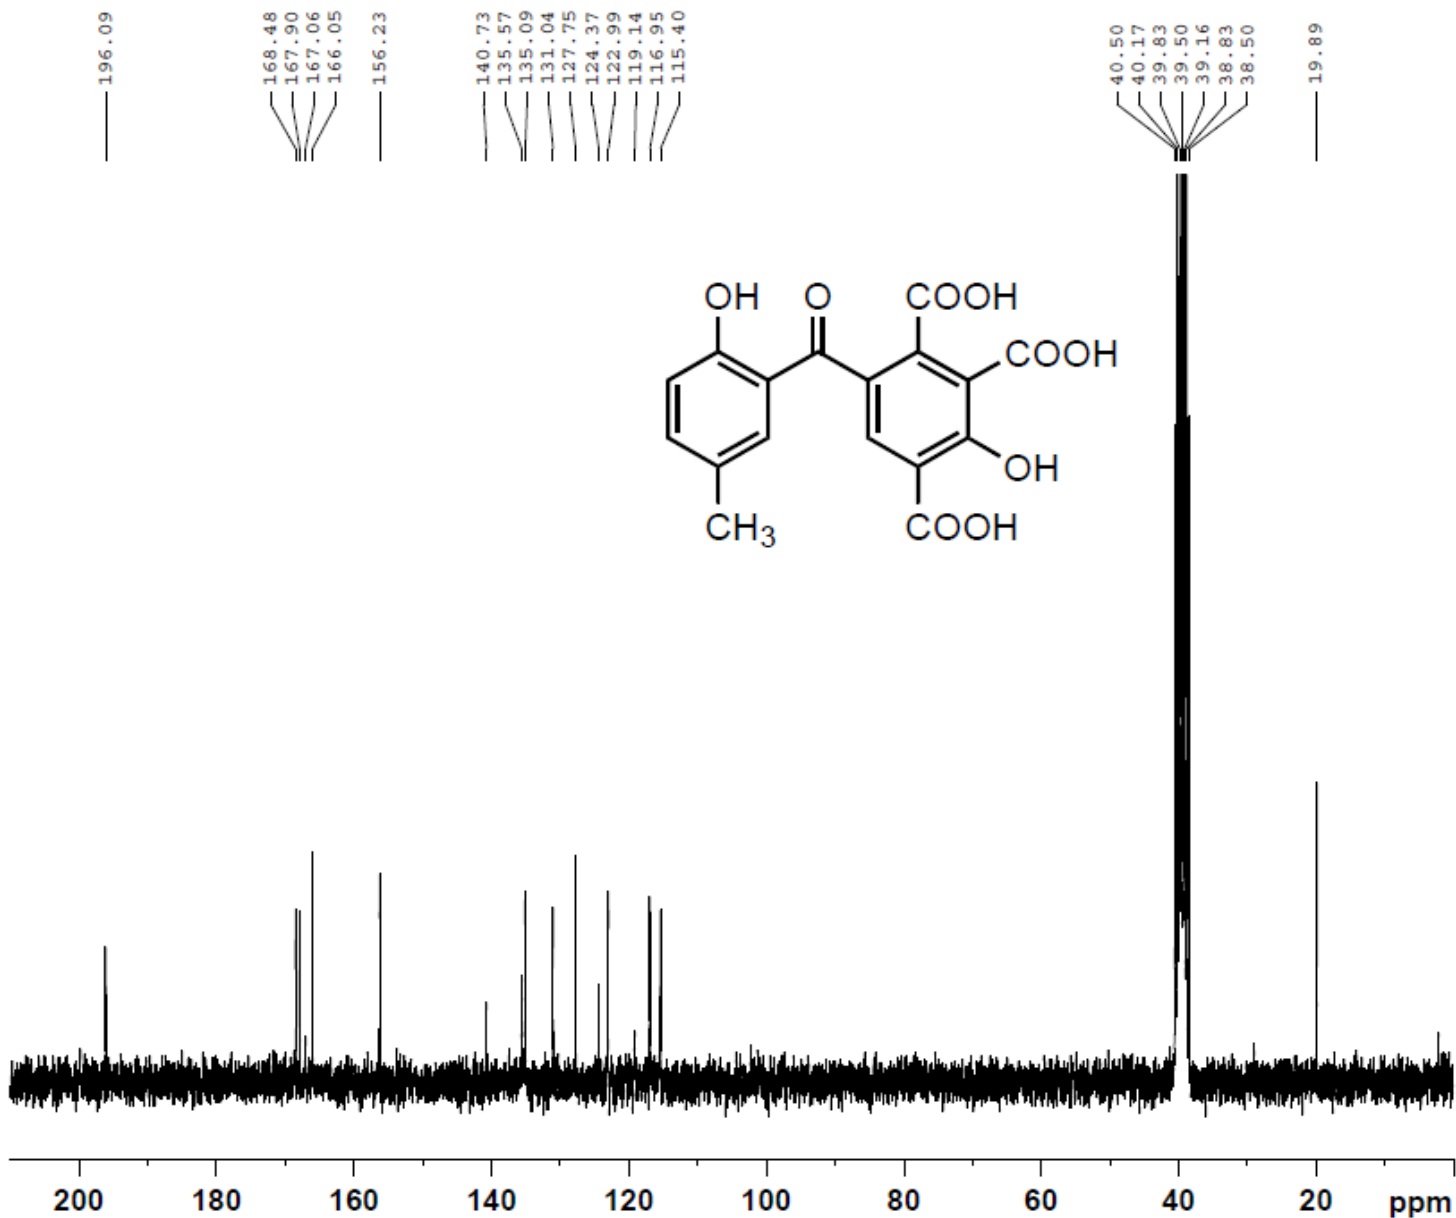

Current Data Parameters  
 NAME 110725.209 IS-139  
 EXPNO 10  
 PROCNO 1

F2 - Acquisition Parameters  
 Date\_ 20110725  
 Time 18.09  
 INSTRUM spect  
 PROBHD 5 mm PABBO BB-  
 PULPROG zgpg30  
 TD 65536  
 SOLVENT DMSO  
 NS 1024  
 DS 4  
 SWH 15000.000 Hz  
 FIDRES 0.228882 Hz  
 AQ 2.1845834 sec  
 RG 2050  
 DW 33.333 usec  
 DE 10.00 usec  
 TE 297.9 K  
 D1 2.00000000 sec  
 d11 0.03000000 sec  
 DELTA 1.89999998 sec  
 TD0 1

===== CHANNEL f1 =====  
 NUC1 13C  
 P1 10.00 usec  
 PL1 -1.00 dB  
 SFO1 62.9015280 MHz

===== CHANNEL f2 =====  
 CPDPRG2 waltz16  
 NUC2 1H  
 PCPD2 70.00 usec  
 PL12 15.00 dB  
 PL13 15.00 dB  
 PL2 -2.50 dB  
 SFO2 250.1310005 MHz

F2 - Processing parameters  
 SI 32768  
 SF 62.8952674 MHz  
 WDW EM  
 SSB 0  
 LB 1.00 Hz  
 GB 0  
 PC 1.40

Savych IS-140 1H DMSO

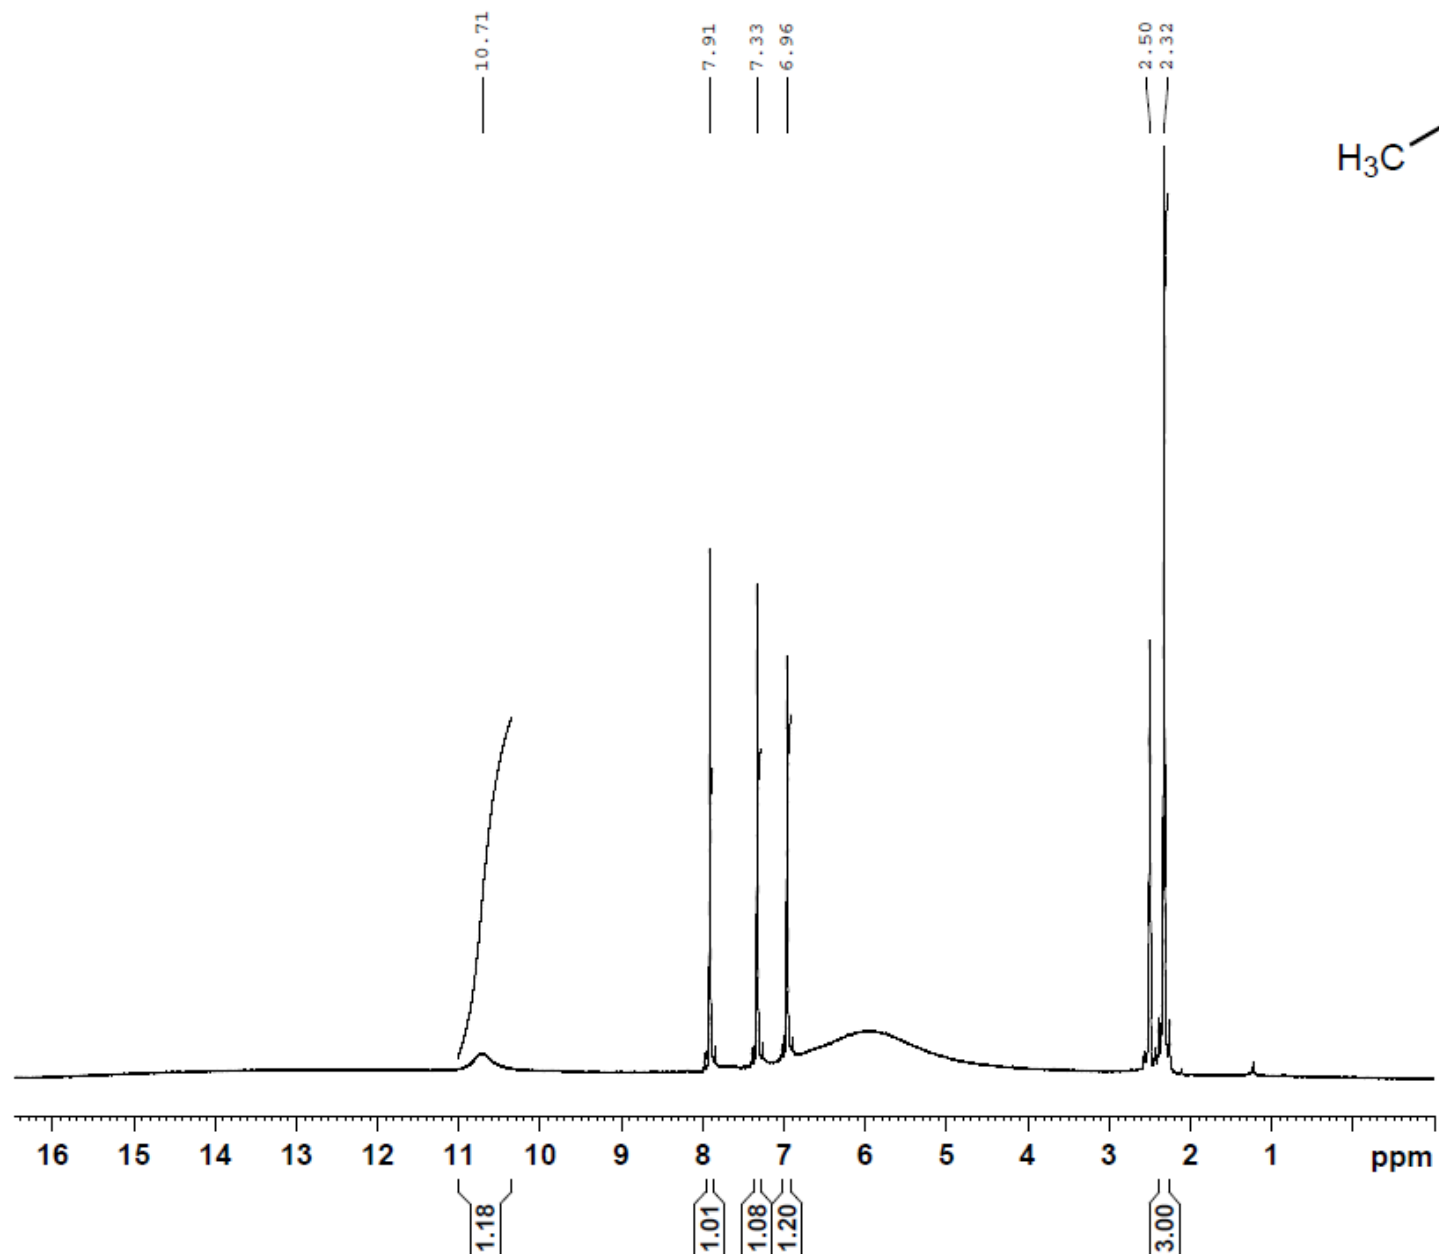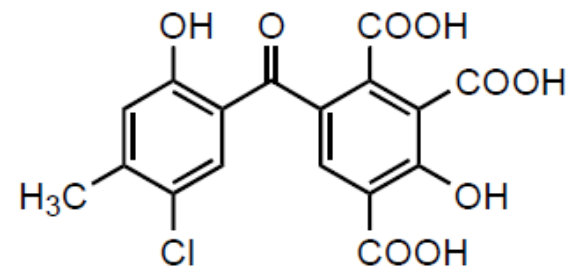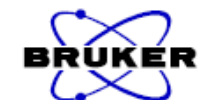

Current Data Parameters

NAME 110725.u325 IS-140  
EXPNO 10  
PROCNO 1

F2 - Acquisition Parameters

Date\_ 20110725  
Time 13.24  
INSTRUM spect  
PROBHD 5 mm PABBO BB-  
PULPROG zg30  
TD 65536  
SOLVENT DMSO  
NS 16  
DS 2  
SWH 6188.119 Hz  
FIDRES 0.094423 Hz  
AQ 5.2953587 sec  
RG 161  
DW 80.800 usec  
DE 10.00 usec  
TE 298.2 K  
D1 1.00000000 sec  
TD0 1

----- CHANNEL f1 -----

NUC1 1H  
P1 10.00 usec  
PL1 0.00 dB  
PL1W 11.25325108 W  
SFO1 300.1318534 MHz

F2 - Processing parameters

SF 32768  
SF 300.1300081 MHz  
WDW EM  
SSB 0  
LB 0.30 Hz  
GB 0  
PC 1.00

Savych IS-140 13C DMSO

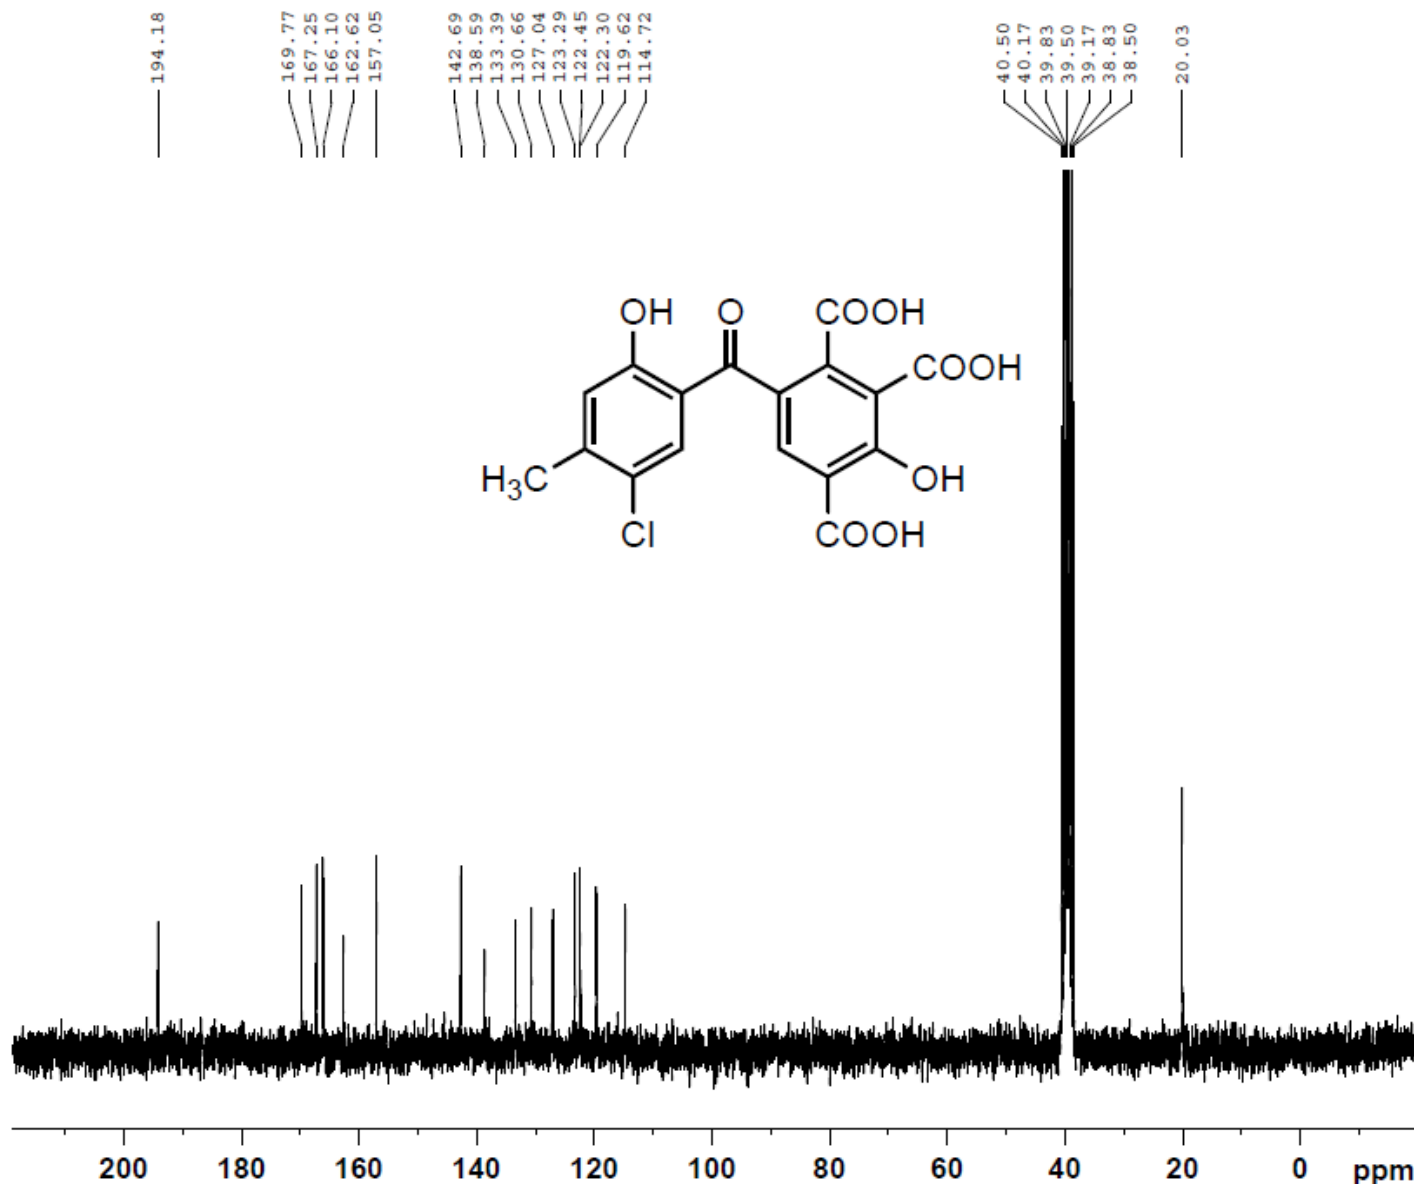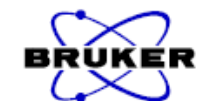

Current Data Parameters  
 NAME 110725.210 IS-140  
 EXPNO 10  
 PROCNO 1

F2 - Acquisition Parameters  
 Date\_ 20110725  
 Time 19.46  
 INSTRUM spect  
 PROBHD 5 mm PABBO BB-  
 PULPROG zgpg30  
 TD 65536  
 SOLVENT DMSO  
 NS 1024  
 DS 4  
 SWH 15000.000 Hz  
 FIDRES 0.228882 Hz  
 AQ 2.1845834 sec  
 RG 2050  
 DW 33.333 usec  
 DE 10.00 usec  
 TE 298.0 K  
 D1 2.00000000 sec  
 d11 0.03000000 sec  
 DELTA 1.89999998 sec  
 TD0 1

===== CHANNEL f1 =====  
 NUC1 13C  
 P1 10.00 usec  
 PL1 -1.00 dB  
 SFO1 62.9015280 MHz

===== CHANNEL f2 =====  
 CPDPRG2 waltz16  
 NUC2 1H  
 PCPD2 70.00 usec  
 PL12 15.00 dB  
 PL13 15.00 dB  
 PL2 -2.50 dB  
 SFO2 250.1310005 MHz

F2 - Processing parameters  
 SI 32768  
 SF 62.8952660 MHz  
 WDW EM  
 SSB 0  
 LB 1.00 Hz  
 GB 0  
 PC 1.40

Savych IS-142 1H DMSO

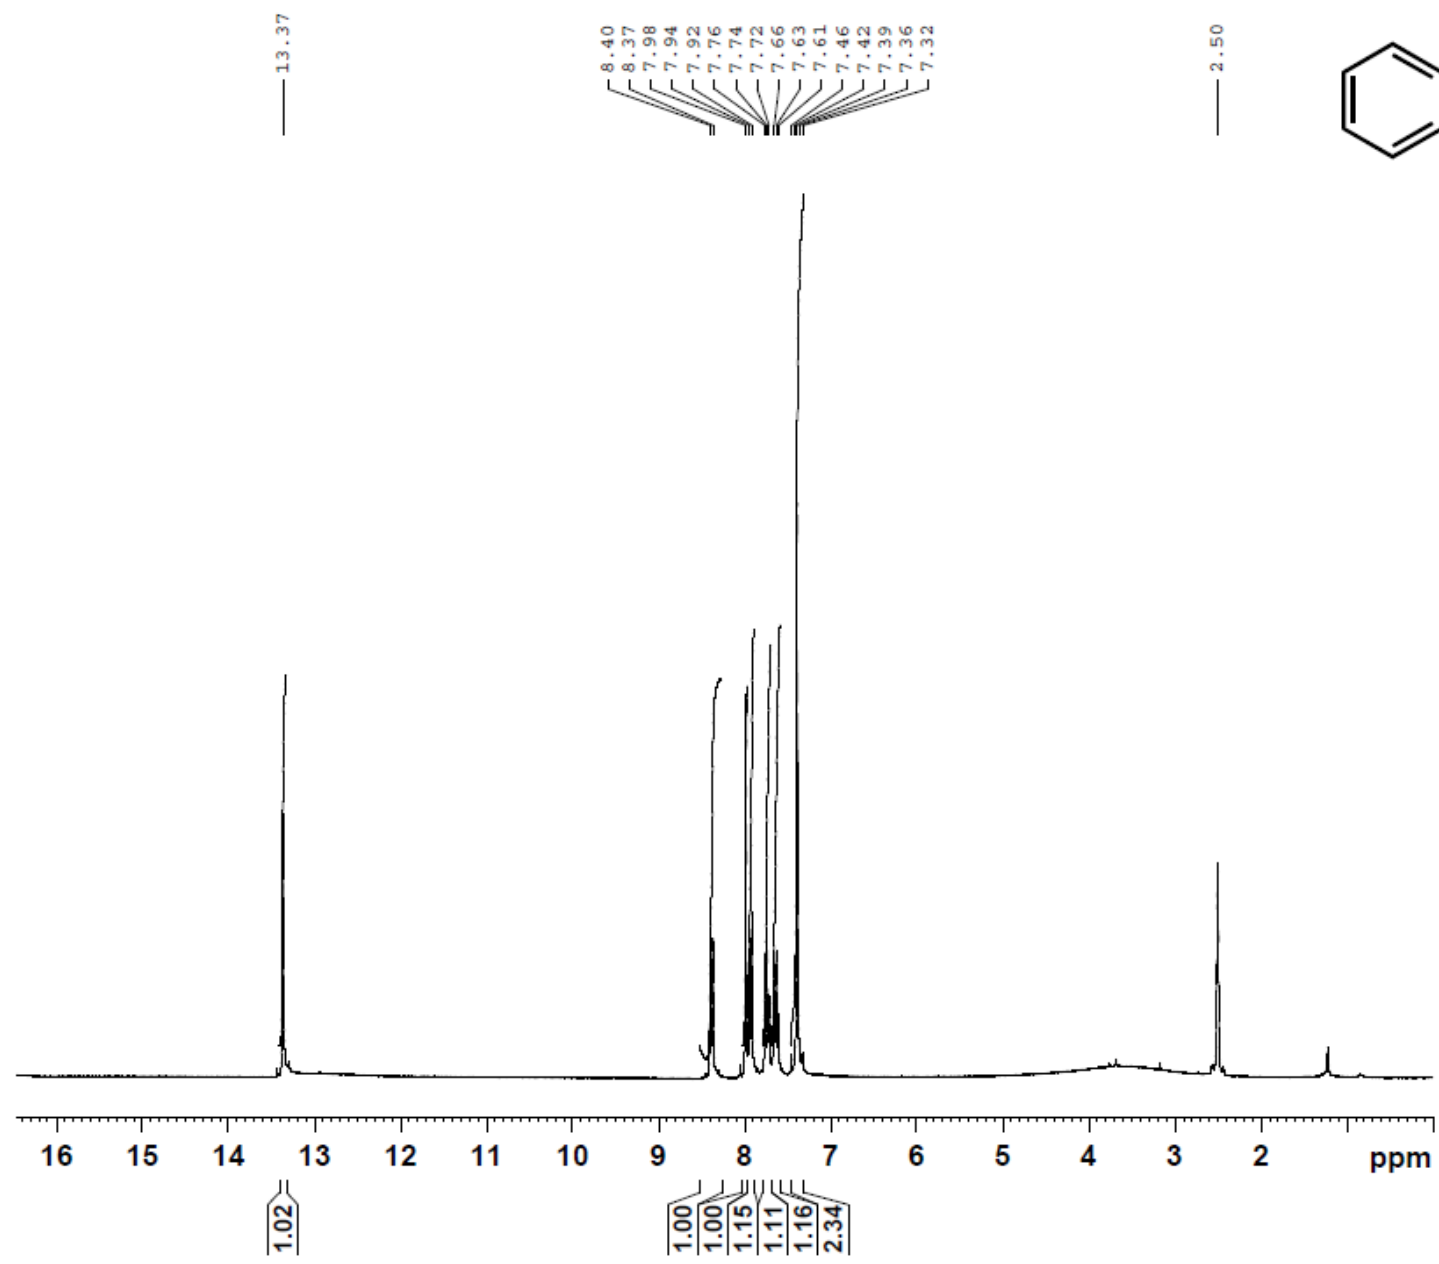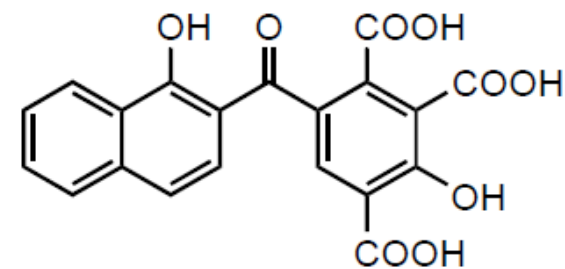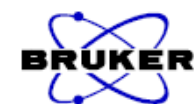

Current Data Parameters  
NAME 110725.u326 IS-142  
EXPNO 10  
PROCNO 1

F2 - Acquisition Parameters  
Date\_ 20110725  
Time 13.29  
INSTRUM spect  
PROBHD 5 mm PABBO BB-  
PULPROG zg30  
TD 65536  
SOLVENT DMSO  
NS 16  
DS 2  
SWH 6188.119 Hz  
FIDRES 0.094423 Hz  
AQ 5.2953587 sec  
RG 161  
DW 80.800 usec  
DE 10.00 usec  
TE 298.2 K  
D1 1.00000000 sec  
TD0 1

===== CHANNEL f1 =====  
NUC1 1H  
P1 10.00 usec  
PL1 0.00 dB  
PL1W 11.25325108 W  
SFO1 300.1318534 MHz

F2 - Processing parameters  
SI 32768  
SF 300.1300095 MHz  
WDW EM  
SSB 0  
LB 0.30 Hz  
GB 0  
PC 1.00

Savych IS-142 13C DMSO

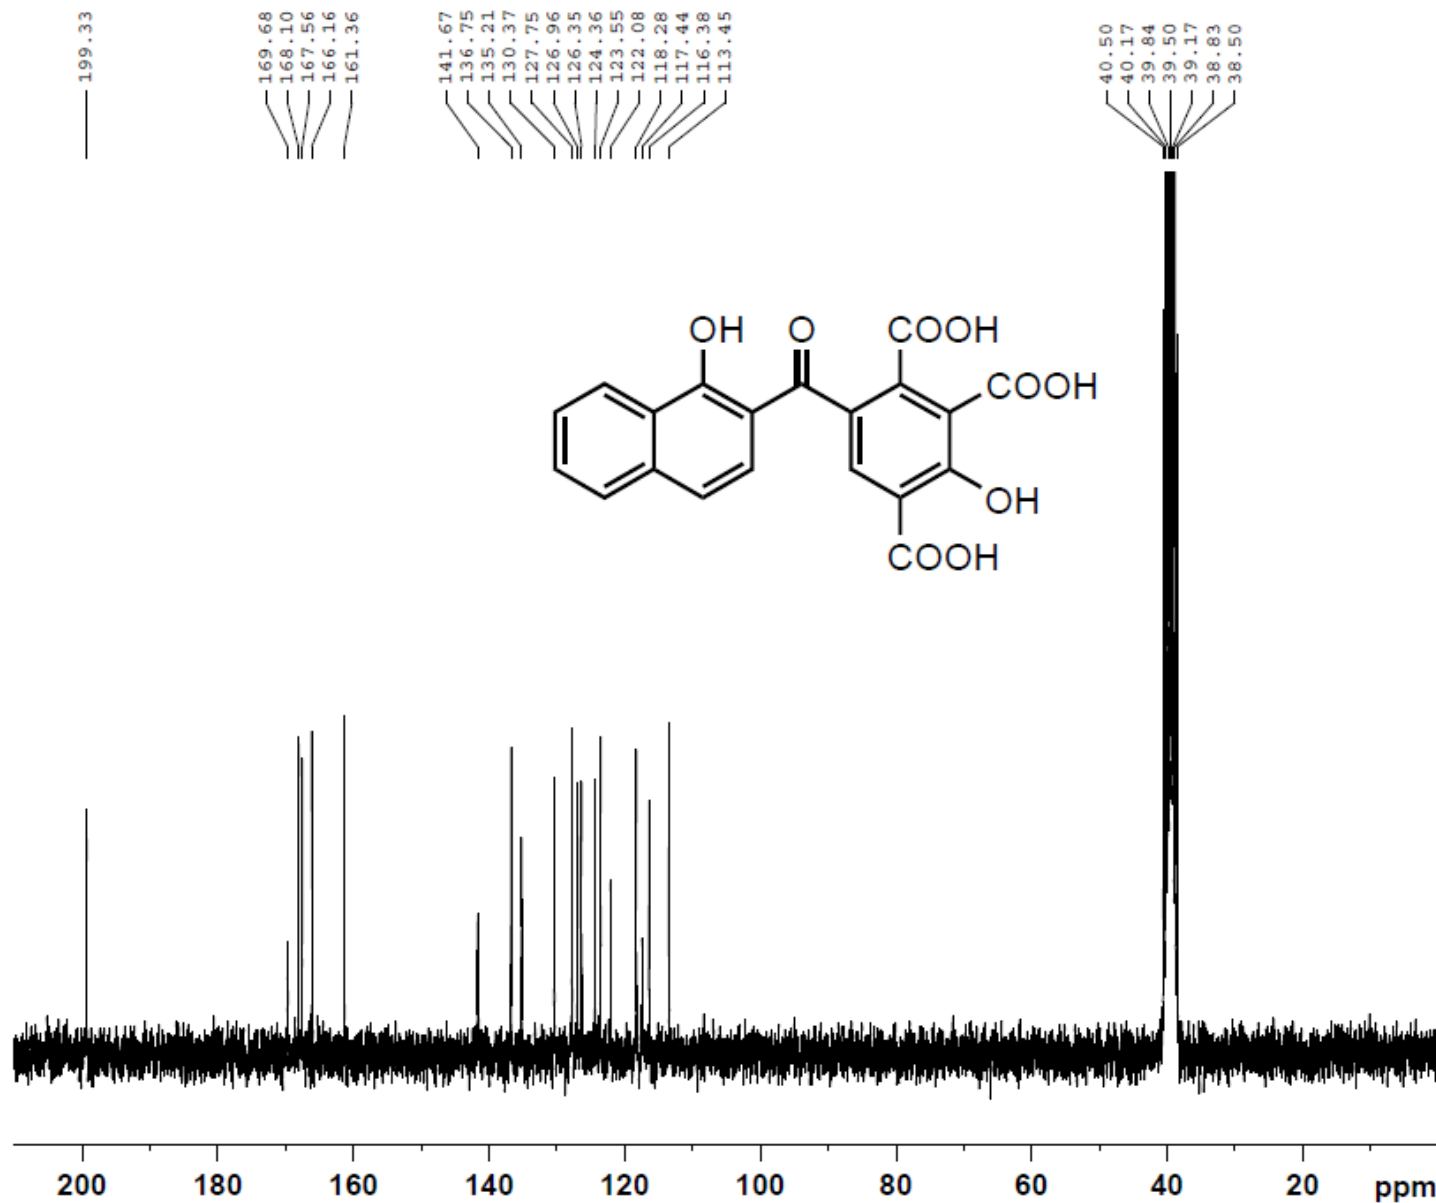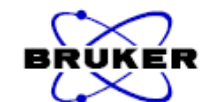

Current Data Parameters  
NAME 110725.211 IS-142  
EXPNO 10  
PROCNO 1

F2 - Acquisition Parameters  
Date\_ 20110725  
Time 21.23  
INSTRUM spect  
PROBHD 5 mm PABBO BB-  
PULPROG zgpg30  
TD 65536  
SOLVENT DMSO  
NS 1024  
DS 4  
SWH 15000.000 Hz  
FIDRES 0.228882 Hz  
AQ 2.1845834 sec  
RG 1620  
DW 33.333 usec  
DE 10.00 usec  
TE 297.9 K  
D1 2.00000000 sec  
d11 0.03000000 sec  
DELTA 1.89999998 sec  
TD0 1

===== CHANNEL f1 =====  
NUC1 13C  
P1 10.00 usec  
PL1 -1.00 dB  
SFO1 62.9015280 MHz

===== CHANNEL f2 =====  
CPDPRG2 waltz16  
NUC2 1H  
PCPD2 70.00 usec  
PL12 15.00 dB  
PL13 15.00 dB  
PL2 -2.50 dB  
SFO2 250.1310005 MHz

F2 - Processing parameters  
SI 32768  
SF 62.8952674 MHz  
WDW EM  
SSB 0  
LB 1.00 Hz  
GB 0  
PC 1.40

Savych IS-144 1H DMSO

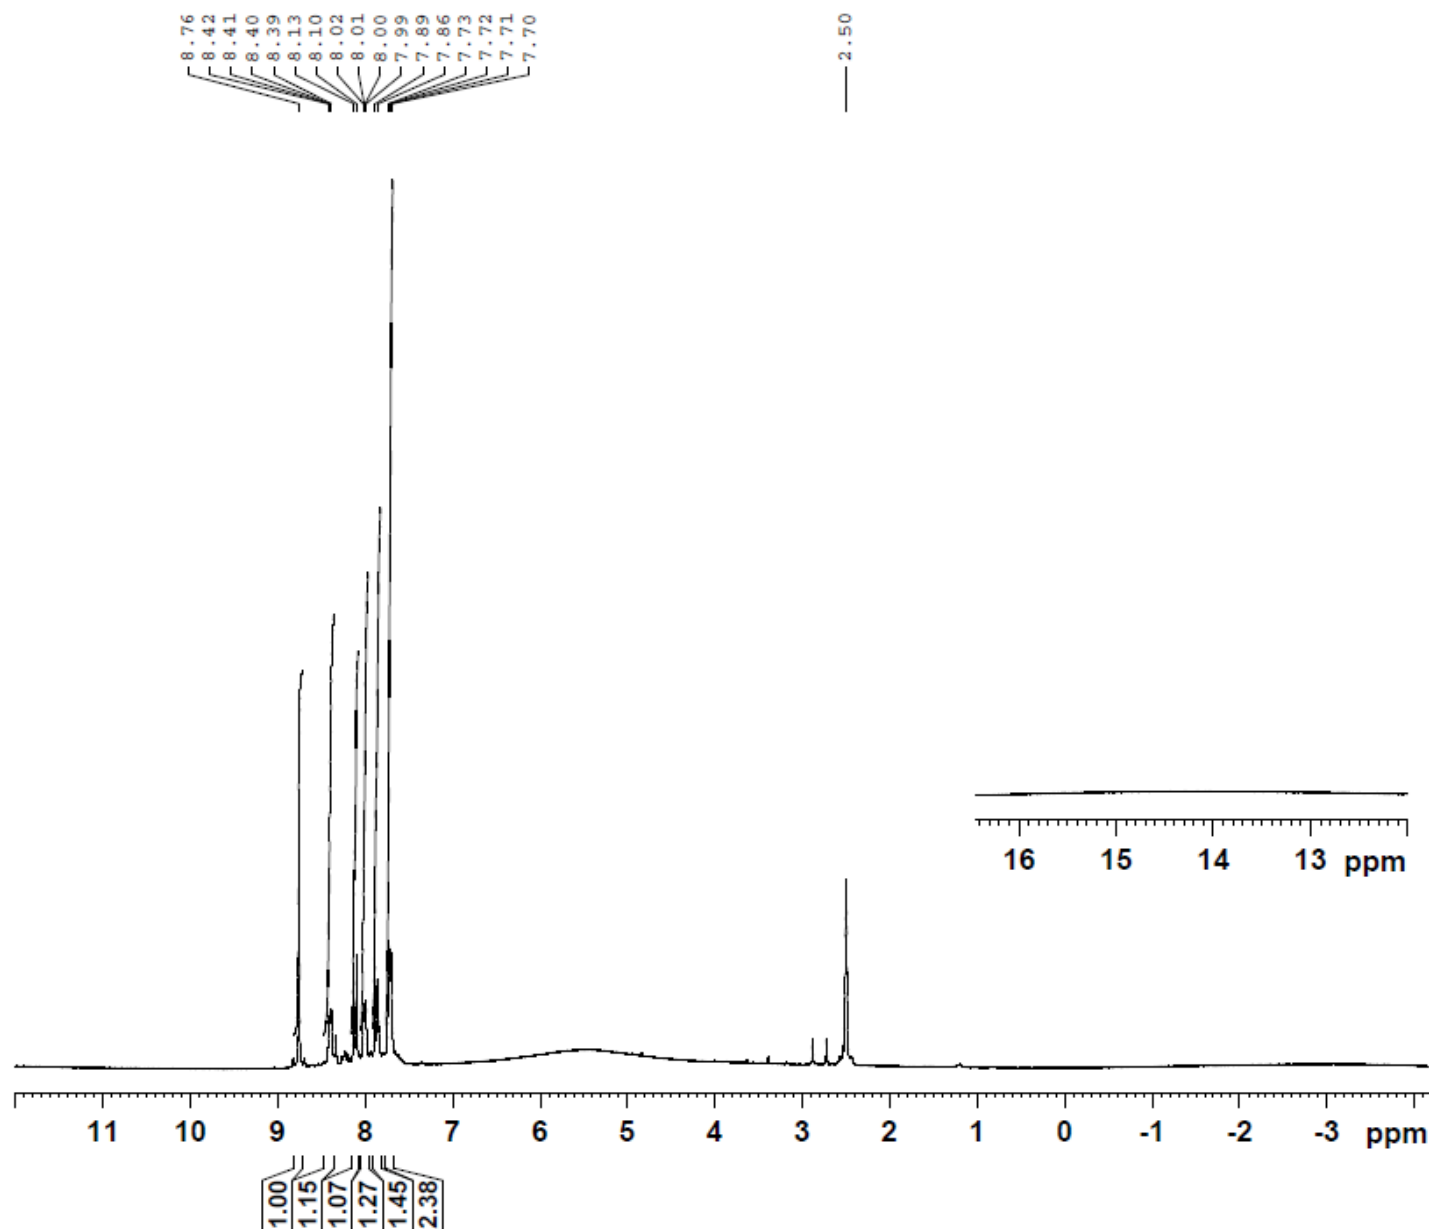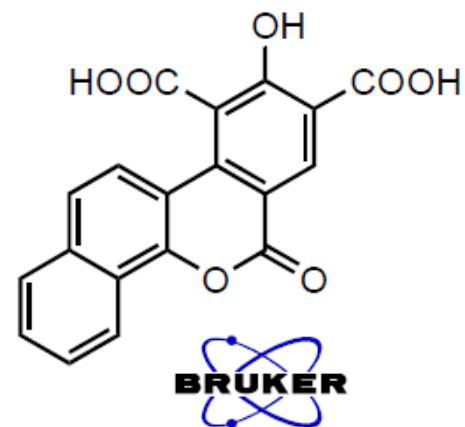

Current Data Parameters  
NAME 110727.u323 IS-144  
EXPNO 10  
PROCNO 1

F2 - Acquisition Parameters  
Date\_ 20110727  
Time 12.57  
INSTRUM spect  
PROBHD 5 mm PABBO BB-  
PULPROG zg30  
TD 65536  
SOLVENT DMSO  
NS 16  
DS 2  
SWH 6188.119 Hz  
FIDRES 0.094423 Hz  
AQ 5.2953587 sec  
RG 181  
DW 80.800 usec  
DE 10.00 usec  
TE 298.2 K  
D1 1.00000000 sec  
TD0 1

==== CHANNEL f1 =====  
NUC1 1H  
P1 10.00 usec  
PL1 0.00 dB  
PL1W 11.25325108 W  
SFO1 300.1318534 MHz

F2 - Processing parameters  
SI 32768  
SF 300.1300105 MHz  
WDW EM  
SSB 0  
LB 0.30 Hz  
GB 0  
PC 1.00

Savych IS-144 13C DMSO

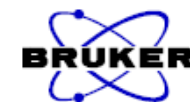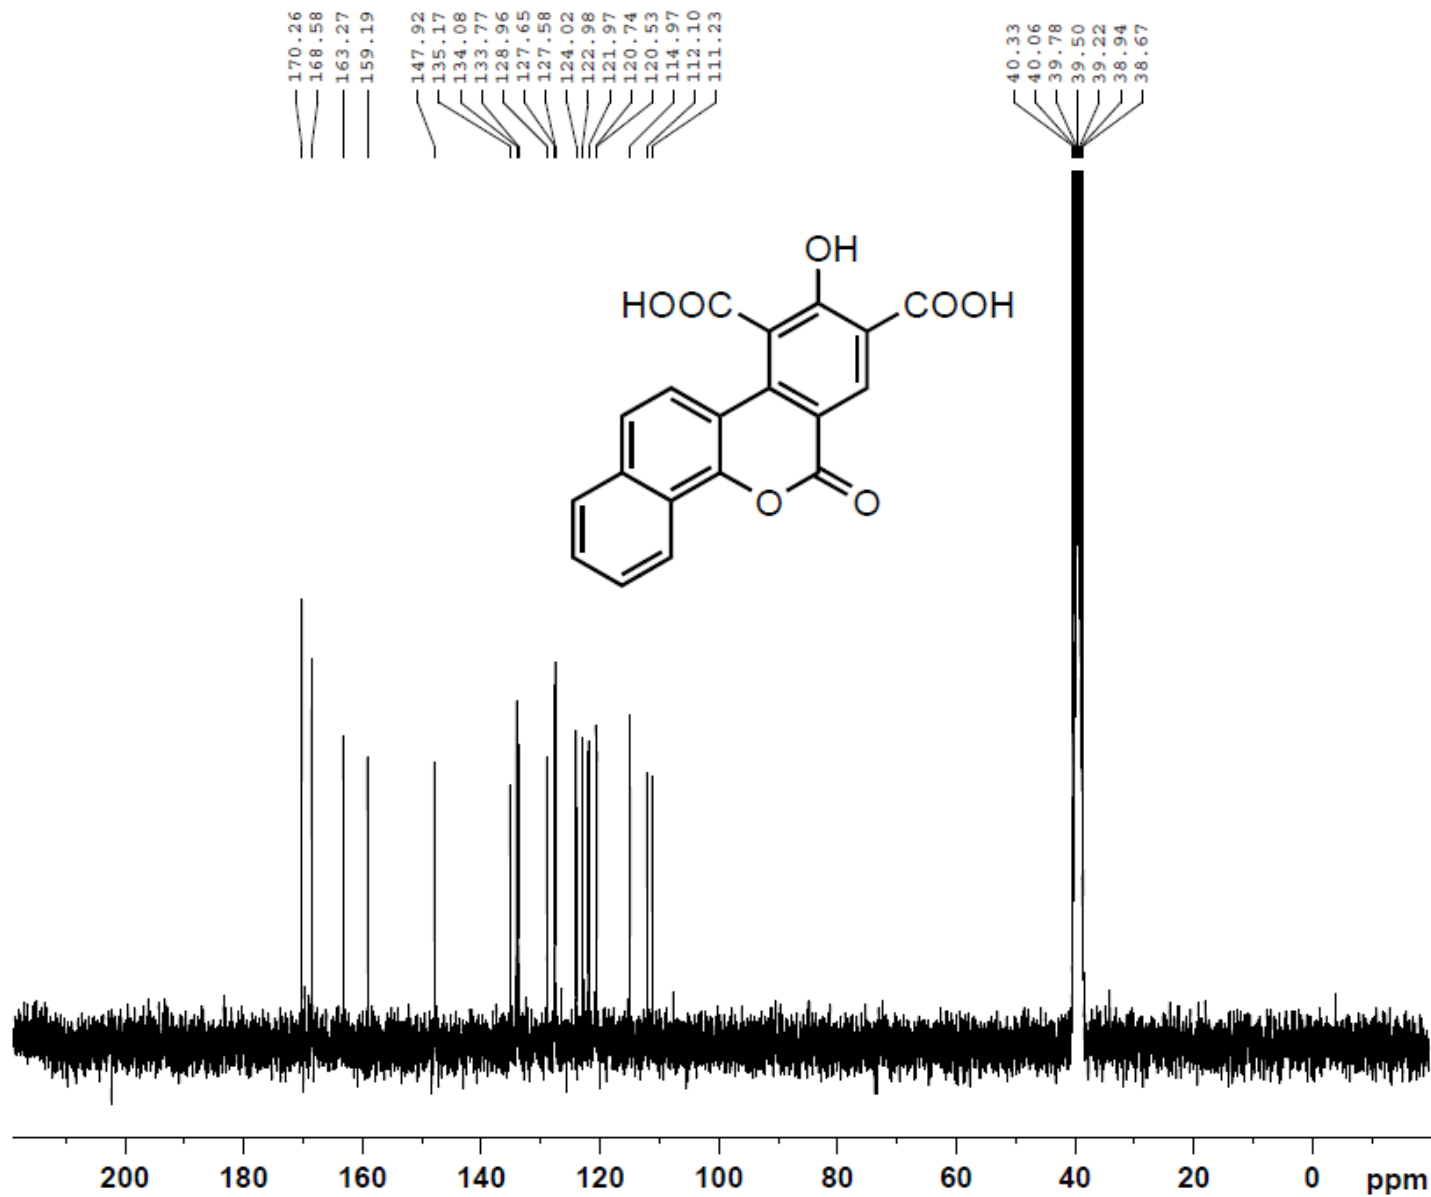

Current Data Parameters  
NAME 110727.u323 IS-144  
EXPNO 13  
PROCNO 1

F2 - Acquisition Parameters  
Date\_ 20110728  
Time 5.36  
INSTRUM spect  
PROBHD 5 mm PABBO BB-  
PULPROG zgpg30  
TD 65536  
SOLVENT DMSO  
NS 1200  
DS 4  
SWH 18028.846 Hz  
FIDRES 0.275098 Hz  
AQ 1.8175818 sec  
RG 2050  
DW 27.733 usec  
DE 10.00 usec  
TE 298.2 K  
D1 2.00000000 sec  
D11 0.03000000 sec  
TD0 1

===== CHANNEL f1 =====  
NUC1 13C  
P1 10.00 usec  
PL1 -0.50 dB  
PL1W 33.25691986 W  
SFO1 75.4752953 MHz

===== CHANNEL f2 =====  
CPDPRG2 waltz16  
NUC2 1H  
PCPD2 72.00 usec  
PL2 0.00 dB  
PL12 17.00 dB  
PL13 17.00 dB  
PL2W 11.25325108 W  
PL12W 0.22453187 W  
PL13W 0.22453187 W  
SFO2 300.1312005 MHz

F2 - Processing parameters  
SI 32768  
SF 75.4677859 MHz  
WDW EM  
SSB 0  
LB 1.00 Hz  
GB 0  
PC 1.40

Savych, IS-136, DMSO, 1H

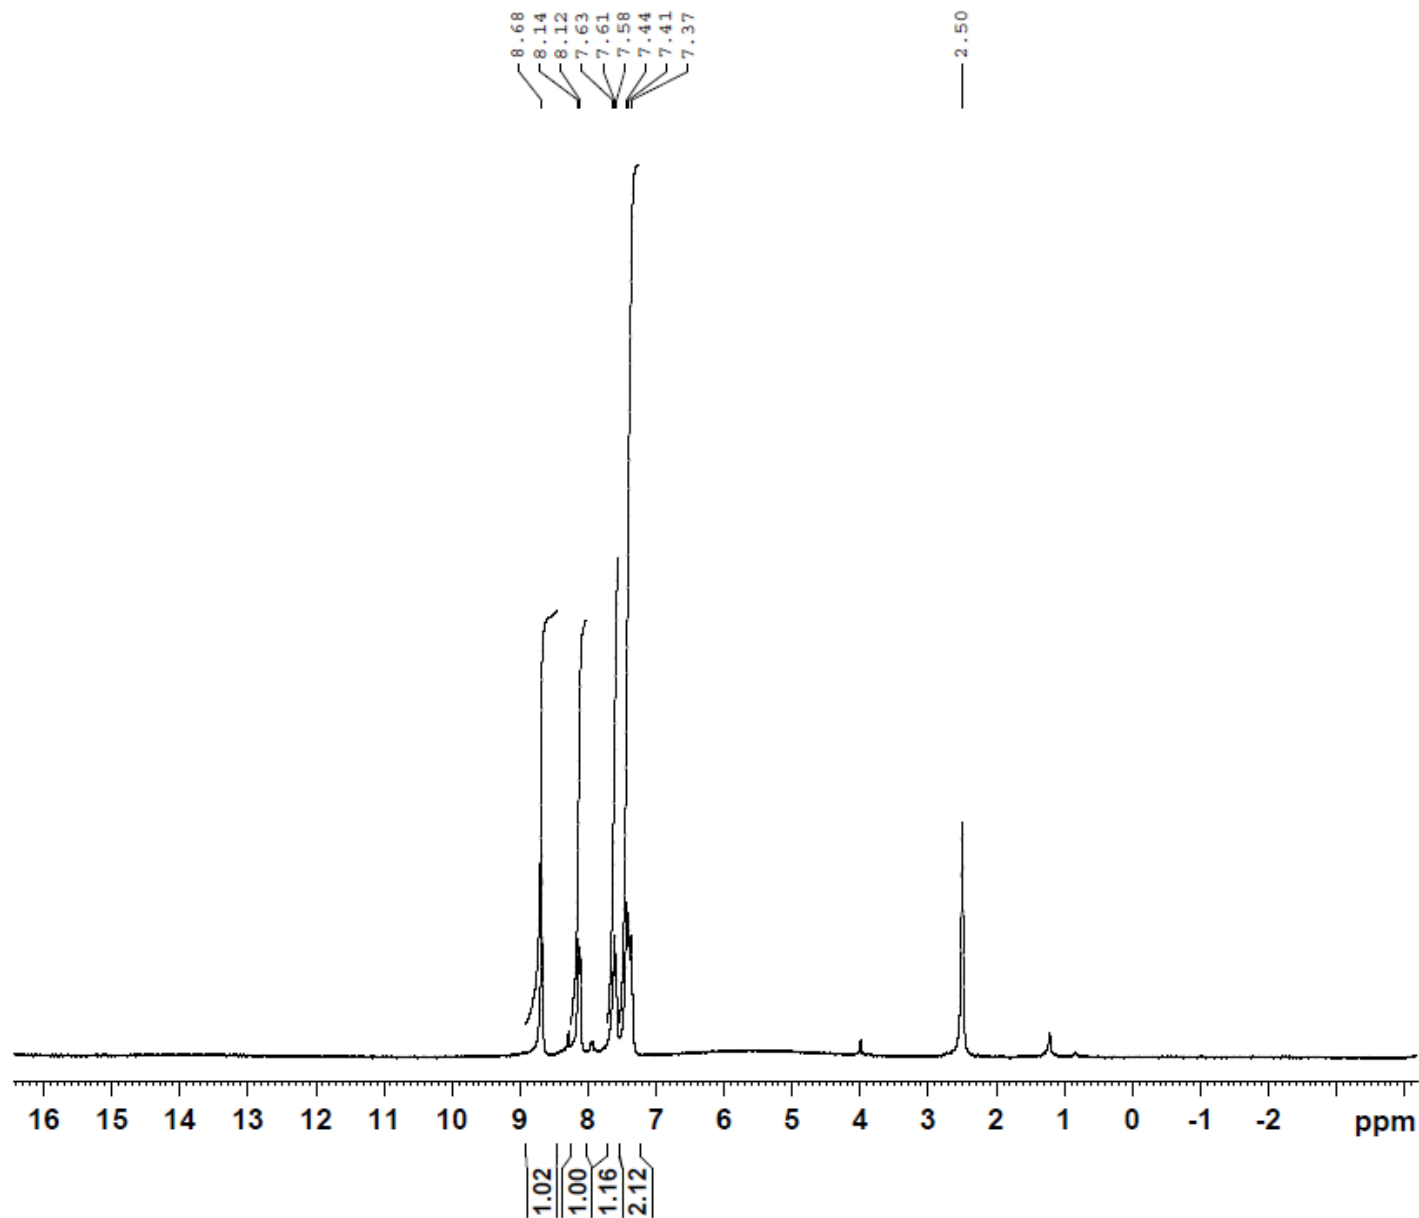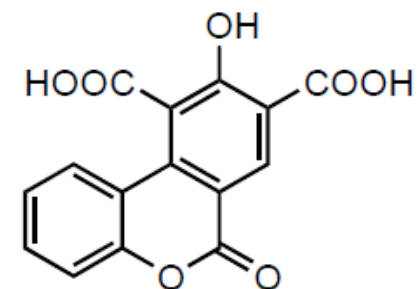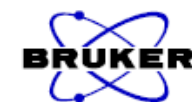

Current Data Parameters  
NAME 110627.u314 IS-136  
EXPNO 10  
PROCNO 1

F2 - Acquisition Parameters  
Date\_ 20110627  
Time 11.50  
INSTRUM spect  
PROBHD 5 mm PABBO BB-  
PULPROG zg30  
TD 65536  
SOLVENT DMSO  
NS 16  
DS 2  
SWH 6188.119 Hz  
FIDRES 0.094423 Hz  
AQ 5.2953587 sec  
RG 161  
DW 80.800 usec  
DE 10.00 usec  
TE 298.2 K  
D1 1.00000000 sec  
TD0 1

----- CHANNEL f1 -----  
NUC1 1H  
P1 10.00 usec  
PL1 0.00 dB  
PL1W 11.25325108 W  
SFO1 300.1318534 MHz

F2 - Processing parameters  
SI 32768  
SF 300.1300165 MHz  
WDW EM  
SSB 0  
LB 0.30 Hz  
GB 0  
PC 1.00



Savych, IS-136, DMSO, 13C

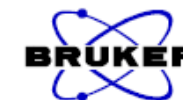

169.59  
169.15  
166.08  
159.60  
151.43

133.65  
133.60  
131.67  
125.06  
124.40  
120.53  
117.90  
116.92  
116.26  
109.85

40.50  
40.17  
39.83  
39.50  
39.16  
38.83  
38.50

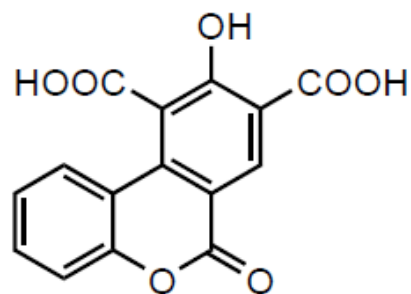

Current Data Parameters  
NAME 110629.209 IS-136  
EXPNO 10  
PROCNO 1

F2 - Acquisition Parameters  
Date\_ 20110629  
Time 15.12  
INSTRUM spect  
PROBHD 5 mm PABBO BB-  
PULPROG zgpg30  
TD 65536  
SOLVENT DMSO  
NS 1024  
DS 4  
SWH 15000.000 Hz  
FIDRES 0.228882 Hz  
AQ 2.1845834 sec  
RG 2050  
DW 33.333 usec  
DE 10.00 usec  
TE 301.1 K  
D1 2.00000000 sec  
d11 0.03000000 sec  
DELTA 1.89999998 sec  
TD0 1

===== CHANNEL f1 =====  
NUC1 13C  
P1 10.00 usec  
PL1 -1.00 dB  
SFO1 62.9015280 MHz

===== CHANNEL f2 =====  
CPDPRG2 waltz16  
NUC2 1H  
PCPD2 70.00 usec  
PL12 15.00 dB  
PL13 15.00 dB  
PL2 -2.50 dB  
SFO2 250.1310005 MHz

F2 - Processing parameters  
SI 32768  
SF 62.8952696 MHz  
WDW EM  
SSB 0  
LB 1.00 Hz  
GB 0  
PC 1.40

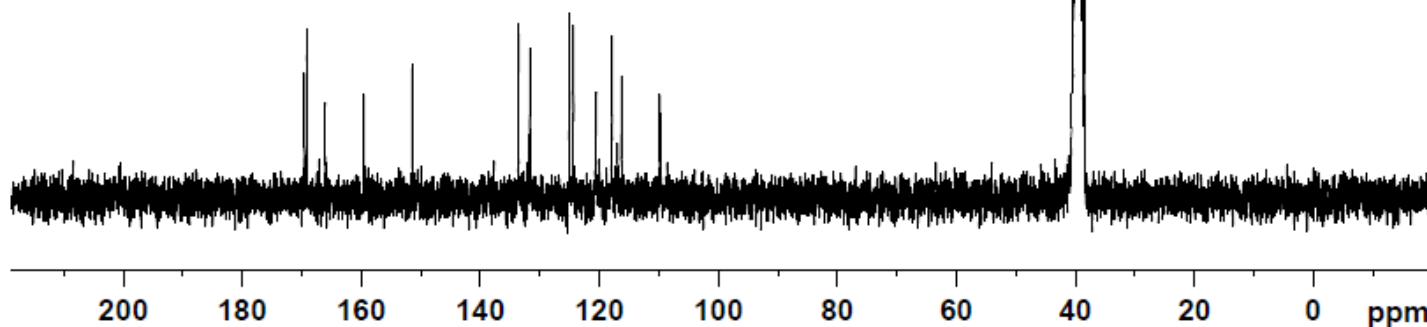

## (F) UV Study

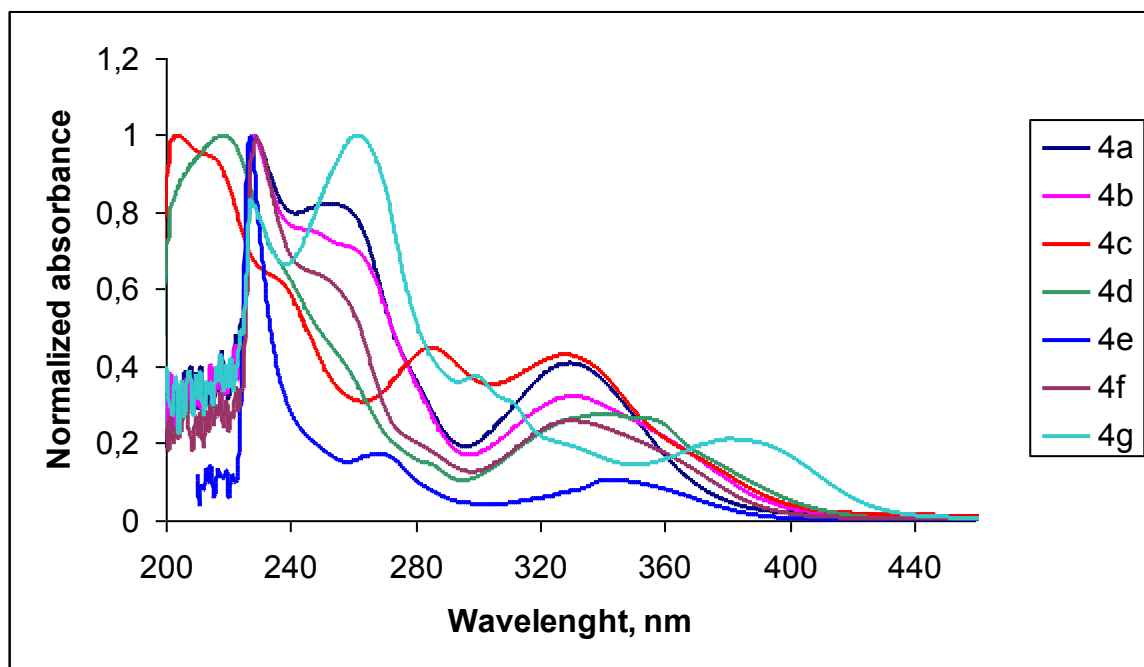

The UV properties of **5a–g**

|           | <b>c</b><br>(mol/l) | $\lambda_{\max,1}$<br>(nm) | <b>A<sub>1</sub></b> | $\epsilon_1$<br>(l cm <sup>-1</sup> mol <sup>-1</sup> ) | <b>log <math>\epsilon_1</math></b> | $\lambda_{\max,2}$<br>(nm) | <b>A<sub>2</sub></b> | $\epsilon_2$<br>(l cm <sup>-1</sup> mol <sup>-1</sup> ) | <b>log <math>\epsilon_2</math></b> | $\lambda_{\max,3}$<br>(nm) | <b>A<sub>3</sub></b> | $\epsilon_3$<br>(l cm <sup>-1</sup> mol <sup>-1</sup> ) | <b>log <math>\epsilon_3</math></b> |
|-----------|---------------------|----------------------------|----------------------|---------------------------------------------------------|------------------------------------|----------------------------|----------------------|---------------------------------------------------------|------------------------------------|----------------------------|----------------------|---------------------------------------------------------|------------------------------------|
| <b>5a</b> | 1,21E-05            | 232                        | 0,356                | 29421                                                   | 4,47                               | 287                        | 0,340                | 28099                                                   | 4,45                               | 337                        | 0,211                | 17438                                                   | 4,24                               |
| <b>5b</b> | 1,31E-05            | 227                        | 0,578                | 44122                                                   | 4,64                               | 288                        | 0,153                | 11679                                                   | 4,07                               | 344                        | 0,105                | 8015                                                    | 3,90                               |
| <b>5c</b> | 1,38E-05            | 215                        | 0,618                | 44783                                                   | 4,65                               | 286                        | 0,302                | 21884                                                   | 4,34                               | 333                        | 0,213                | 15435                                                   | 4,19                               |
| <b>5d</b> | 1,06E-05            | 228                        | 0,641                | 60472                                                   | 4,78                               | 299                        | 0,180                | 16981                                                   | 4,23                               | 344                        | 0,373                | 35189                                                   | 4,55                               |
| <b>5e</b> | 1,25E-05            | 231                        | 0,445                | 35600                                                   | 4,55                               | 291                        | 0,388                | 31040                                                   | 4,49                               | 341                        | 0,288                | 23040                                                   | 4,36                               |
| <b>5f</b> | 6,92E-06            | 227                        | 0,583                | 84249                                                   | 4,93                               | 288                        | 0,152                | 21965                                                   | 4,34                               | 344                        | 0,094                | 13584                                                   | 4,13                               |
| <b>5g</b> | 1,19E-05            | 232                        | 0,812                | 68235                                                   | 4,83                               | 325<br>284                 | 0,336<br>0,679       | 28235<br>57059                                          | 4,45<br>4,76                       | 365                        | 0,251                | 21092                                                   | 4,32                               |

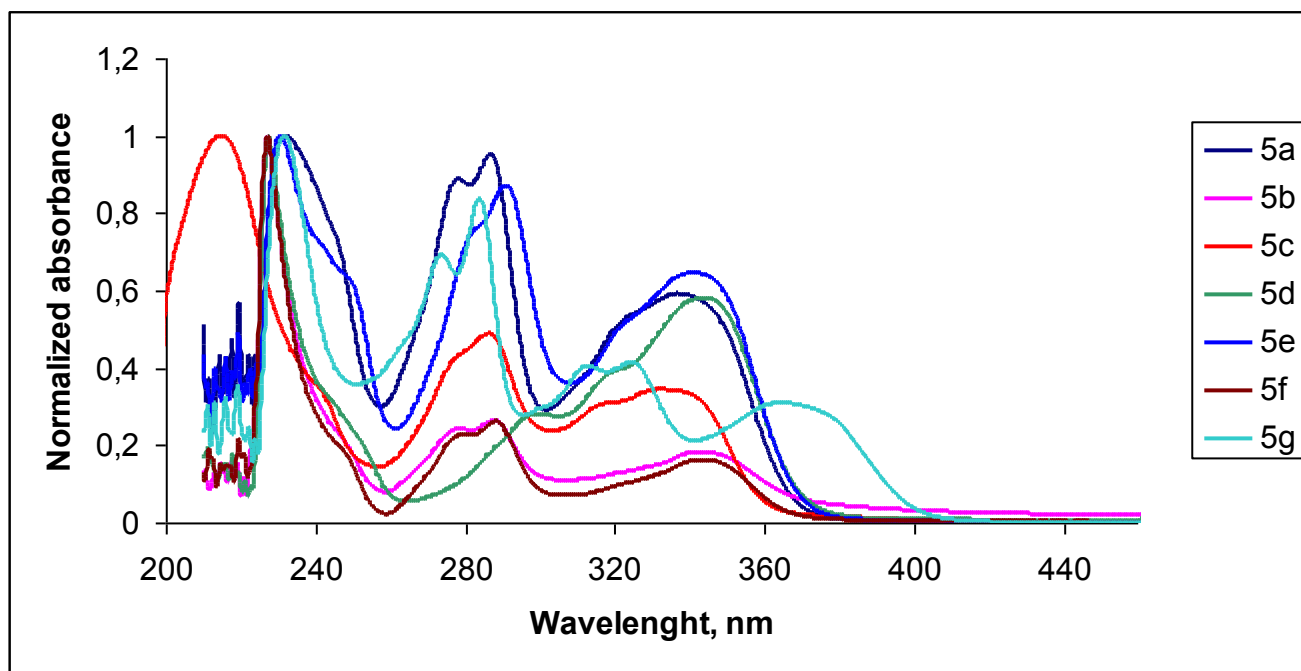

The UV properties of **5h–n**

|           | <b>c</b><br>(mol/l) | $\lambda_{\max,1}$<br>(nm) | $A_1$ | $\epsilon_1$<br>(l cm <sup>-1</sup> mol <sup>-1</sup> ) | log $\epsilon_1$ | $\lambda_{\max,2}$<br>(nm) | $A_2$          | $\epsilon_2$<br>(l cm <sup>-1</sup> mol <sup>-1</sup> ) | log $\epsilon_2$ | $\lambda_{\max,3}$<br>(nm) | $A_3$ | $\epsilon_3$<br>(l cm <sup>-1</sup> mol <sup>-1</sup> ) | log $\epsilon_3$ |
|-----------|---------------------|----------------------------|-------|---------------------------------------------------------|------------------|----------------------------|----------------|---------------------------------------------------------|------------------|----------------------------|-------|---------------------------------------------------------|------------------|
| <b>5h</b> | 9,57E-06            | 227                        | 0,630 | 65831                                                   | 4,82             | 289                        | 0,241          | 25183                                                   | 4,40             | 339                        | 0,168 | 17555                                                   | 4,24             |
| <b>5i</b> | 1,31E-05            | 216                        | 0,620 | 47328                                                   | 4,68             | 289                        | 0,305          | 23282                                                   | 4,37             | 339                        | 0,209 | 15954                                                   | 4,20             |
| <b>5j</b> | 1,31E-05            | 227                        | 0,633 | 48321                                                   | 4,68             | 344                        | 0,368          | 28092                                                   | 4,45             |                            |       |                                                         |                  |
| <b>5k</b> | 8,39E-06            | 227                        | 0,740 | 88200                                                   | 4,95             | 287                        | 0,173          | 20620                                                   | 4,31             | 344                        | 0,106 | 12634                                                   | 4,10             |
| <b>5l</b> | 1,09E-05            | 232                        | 0,371 | 34037                                                   | 4,53             | 291                        | 0,308          | 28257                                                   | 4,45             | 341                        | 0,227 | 20826                                                   | 4,32             |
| <b>5m</b> | 4,69E-06            | 229                        | 0,361 | 76972                                                   | 4,89             | 288                        | 0,225          | 47974                                                   | 4,68             | 334                        | 0,146 | 31130                                                   | 4,49             |
| <b>5n</b> | 1,04E-05            | 232                        | 0,535 | 51442                                                   | 4,71             | 323<br>283                 | 0,219<br>0,450 | 21058                                                   | 4,32             | 365                        | 0,159 | 15288                                                   | 4,18             |

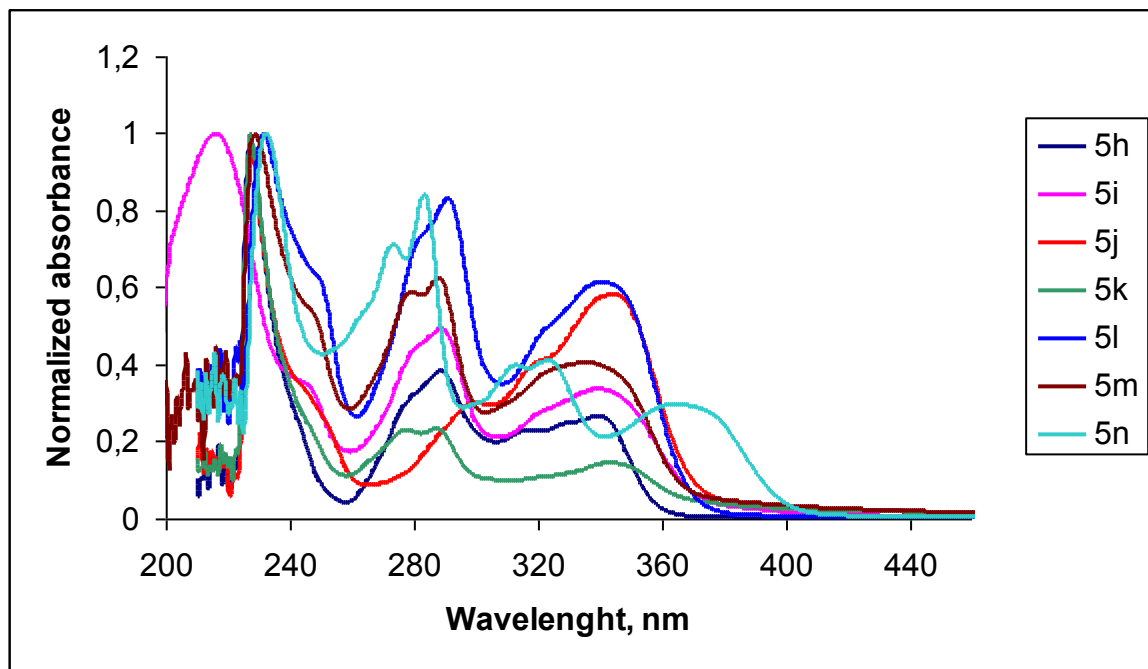

The UV properties of **6–8**

|           | <b>c</b><br>(mol/l) | $\lambda_{\max,1}$<br>(nm) | <b>A<sub>1</sub></b> | $\epsilon_1$<br>(l cm <sup>-1</sup> mol <sup>-1</sup> ) | <b>log <math>\epsilon_1</math></b> | $\lambda_{\max,2}$<br>(nm) | <b>A<sub>2</sub></b> | $\epsilon_2$<br>(l cm <sup>-1</sup> mol <sup>-1</sup> ) | <b>log <math>\epsilon_2</math></b> | $\lambda_{\max,3}$<br>(nm) | <b>A<sub>3</sub></b> | $\epsilon_3$<br>(l cm <sup>-1</sup> mol <sup>-1</sup> ) | <b>log <math>\epsilon_3</math></b> |
|-----------|---------------------|----------------------------|----------------------|---------------------------------------------------------|------------------------------------|----------------------------|----------------------|---------------------------------------------------------|------------------------------------|----------------------------|----------------------|---------------------------------------------------------|------------------------------------|
| <b>6a</b> | 1,21E-05            | 226                        | 0,343                | 28347                                                   | 4,45                               | 266                        | 0,147                | 12149                                                   | 4,08                               | 274                        | 0,162                | 13388                                                   | 4,13                               |
| <b>6b</b> | 1,05E-05            | 225                        | 0,279                | 26571                                                   | 4,42                               | 266                        | 0,106                | 10095                                                   | 4,00                               | 277                        | 0,129                | 12286                                                   | 4,09                               |
| <b>6c</b> | 2,32E-05            | 204                        | 0,918                | 39569                                                   | 4,60                               | 316                        | 0,236                | 10172                                                   | 4,01                               |                            |                      |                                                         |                                    |
| <b>6e</b> | 1,33E-05            | 223                        | 0,304                | 22857                                                   | 4,36                               | 267                        | 0,237                | 17820                                                   | 4,25                               | 398                        | 0,065                | 4887                                                    | 3,69                               |
|           |                     |                            |                      |                                                         |                                    | 280                        | 0,266                | 20000                                                   | 4,30                               |                            |                      |                                                         |                                    |
| <b>7a</b> | 1,11E-05            | 233                        | 0,483                | 43514                                                   | 4,64                               | 262                        | 0,494                | 44505                                                   | 4,65                               | 301                        | 0,181                | 16306                                                   | 4,21                               |
| <b>7b</b> | 1,27E-05            | 224                        | 0,440                | 34646                                                   | 4,54                               | 271                        | 0,163                | 12835                                                   | 4,11                               | 307                        | 0,105                | 8268                                                    | 3,92                               |
| <b>8a</b> | 1,15E-05            | 204                        | 1,256                | 109217                                                  | 5,04                               | 250                        | 0,721                | 62696                                                   | 4,80                               |                            |                      |                                                         |                                    |
| <b>8b</b> | 4,54E-05            | 222                        | 1,462                | 32203                                                   | 4,51                               | 250                        | 1,365                | 30066                                                   | 4,48                               |                            |                      |                                                         |                                    |

|           |          |     |       |       |      |     |       |       |      |     |       |       |      |
|-----------|----------|-----|-------|-------|------|-----|-------|-------|------|-----|-------|-------|------|
| <b>8c</b> | 2,51E-05 | 205 | 1,476 | 58805 | 4,77 | 251 | 0,808 | 32191 | 4,51 |     |       |       |      |
| <b>8d</b> | 1,12E-05 | 223 | 0,389 | 34732 | 4,54 | 266 | 0,247 | 22054 | 4,34 | 273 | 0,252 | 22500 | 4,35 |

The UV properties of **9a,b,e,g** and **10c**

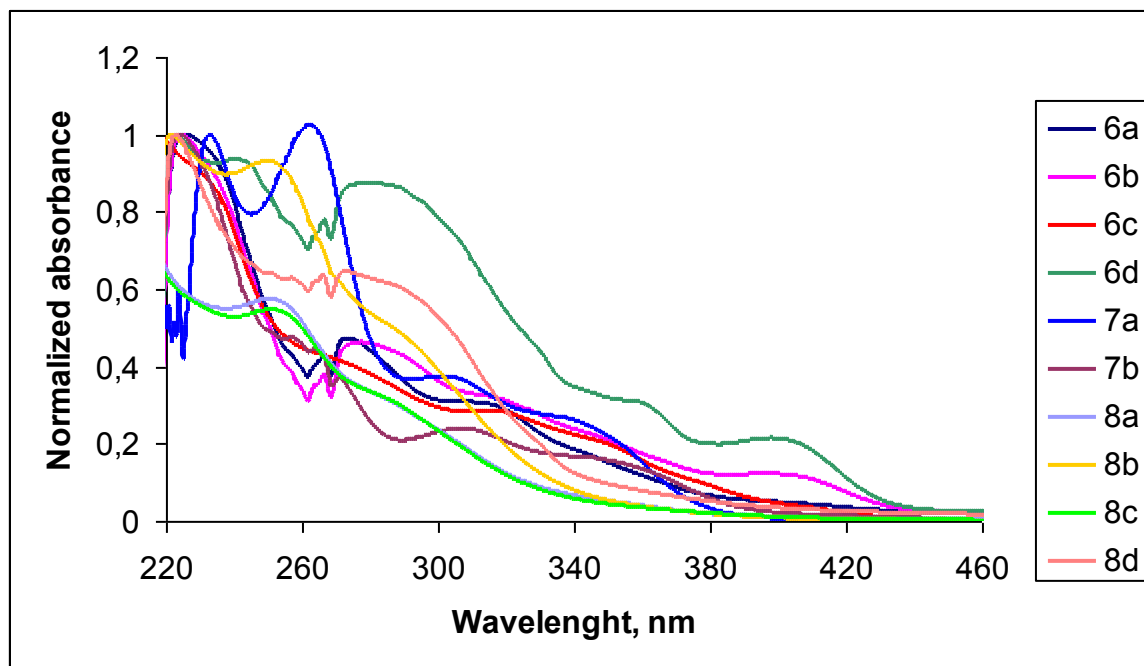

| Compound   | c (mol/l) | $\lambda_{\max,1}$ (nm) | $A_1$ | $\epsilon_1$ (l cm <sup>-1</sup> mol <sup>-1</sup> ) | log $\epsilon_1$ | $\lambda_{\max,2}$ (nm) | $A_2$ | $\epsilon_2$ (l cm <sup>-1</sup> mol <sup>-1</sup> ) | log $\epsilon_2$ | $\lambda_{\max,3}$ (nm) | $A_3$ | $\epsilon_3$ (l cm <sup>-1</sup> mol <sup>-1</sup> ) | log $\epsilon_3$ |
|------------|-----------|-------------------------|-------|------------------------------------------------------|------------------|-------------------------|-------|------------------------------------------------------|------------------|-------------------------|-------|------------------------------------------------------|------------------|
| <b>9a</b>  | 1,30E-05  | 206                     | 0,860 | 66154                                                | 4,82             | 256                     | 0,374 | 28769                                                | 4,46             | 335                     | 0,224 | 17231                                                | 4,24             |
| <b>9b</b>  | 1,20E-05  | 218                     | 0,805 | 67083                                                | 4,83             | 256                     | 0,422 | 35167                                                | 4,55             | 346                     | 0,257 | 21417                                                | 4,33             |
| <b>9e</b>  | 1,10E-05  | 221                     | 0,831 | 75545                                                | 4,88             | 259                     | 0,397 | 36091                                                | 4,56             | 342                     | 0,235 | 21364                                                | 4,33             |
| <b>9g</b>  | 1,32E-05  | 219                     | 1,307 | 99015                                                | 5,00             | 260                     | 1,076 | 81515                                                | 4,91             | 360                     | 0,298 | 22576                                                | 4,35             |
|            |           |                         |       |                                                      |                  | 299                     | 0,387 | 29318                                                | 4,47             |                         |       |                                                      |                  |
| <b>10c</b> | 1,50E-05  | 202                     | 0,735 | 49000                                                | 4,69             | 264                     | 1,198 | 79867                                                | 4,90             | 308                     | 0,289 | 19267                                                | 4,28             |

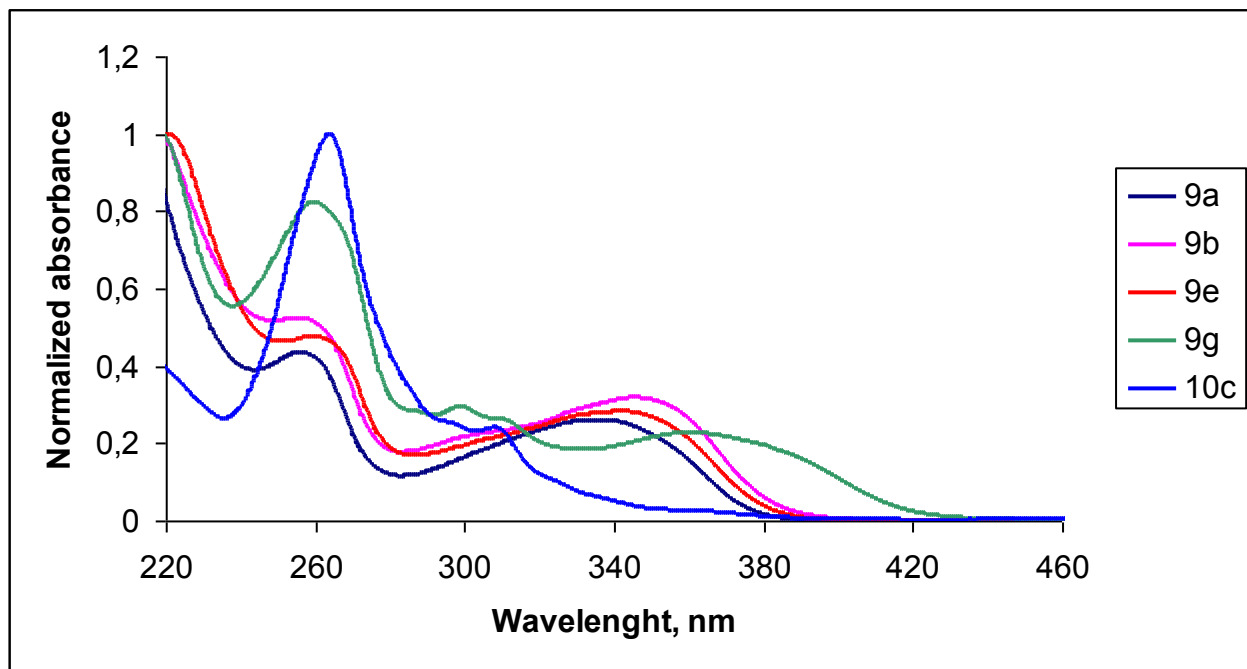

Supplement: c2ob07020k_2.pdf [file c2ob07020k_2.pdf]
